# Supplementary material for: Integrative multi-omic analysis identifies new drivers and pathways in molecularly distinct subtypes of ALS
Source: PubMed Central journal article supplement (PMC6620285; doi:10.1038/s41598-019-46355-w), 2019-07-10
Supplement: 41598_2019_46355_MOESM1_ESM.pdf [file 41598_2019_46355_MOESM1_ESM.pdf]

## Original Article

### **Integrative multi-omic analysis identifies new drivers and pathways in molecularly distinct subtypes of ALS**

Giovanna Morello<sup>a</sup>, Maria Guarnaccia<sup>a</sup>, Antonio Gianmaria Spampinato<sup>a</sup>, Salvatore Salomone<sup>b</sup>,  
Velia D'Agata<sup>c</sup>, Francesca Luisa Conforti<sup>f</sup>, Eleonora Aronica<sup>d,e</sup> and Sebastiano Cavallaro<sup>a,#</sup>

<sup>a</sup>*Institute of Neurological Sciences, Italian National Research Council, Catania, Italy; Department of Biomedical and Biotechnological Sciences, Section of <sup>b</sup>Pharmacology and <sup>c</sup>Human Anatomy and Histology, University of Catania, Catania, Italy.* <sup>d</sup>*Department of NeuroPathology, Academic Medical Center, Amsterdam, the Netherlands;* <sup>e</sup>*Swammerdam Institute for Life Sciences, Center for Neuroscience; University of Amsterdam, Amsterdam, The Netherlands;* <sup>f</sup>*Department of Pharmacy, Health and Nutritional Sciences, University of Calabria, Rende (Cosenza), Italy*

<sup>#</sup>Corresponding author: Sebastiano Cavallaro, M.D., Ph.D., Institute of Neurological Sciences (ISN), CNR, Via Paolo Gaifami, 18, 95125 Catania, Italy. Phone: +39.095.7338111; Fax: +39.095.7338110; E-mail: [sebastiano.cavallaro@cnr.it](mailto:sebastiano.cavallaro@cnr.it)

## Supplementary Information

### **Supplementary Figure and Table Legends**

**Supplementary Figure 1.** Legend describing symbols used in the interaction map.

**Supplementary Figure 2.** Correlation analysis of DNA copy number and expression variation in two randomized SALS patient subgroup. Venn diagrams compare the number of protein-coding genes obtained from CNV analyses with the genes found to be differentially expressed Random group 1 (A) and Random group 2 (B) of SALS patients.

**Supplementary Table 1.** General information of patients and individual controls.

**Supplementary Table 2.** List of genes represented in the *NeuroArray* aCGH v.2.0 design.

**Supplementary Table 3.** Comparison of the data obtained for 5 selected genes by *NeuroArray* aCGH analysis and Real-Time RT-PCR.

**Supplementary Table 4.** Chromosomal regions with amplifications and deletions present in > 10% of SALS patients.

**Supplementary Table 5.** Chromosomal regions with gains and losses present in > 10% of SALS1 patients.

**Supplementary Table 6.** Chromosomal regions with gains and losses present in > 10% of SALS2 patients.

**Supplementary Table 7.** List of genes located in the most recurrent CNVs of SALS patients (penetrance > 10%).

**Supplementary Table 8.** List of genes located in the most recurrent CNVs of SALS1 patients (penetrance > 10%).

**Supplementary Table 9.** List of genes located in the most recurrent CNVs of SALS2 patients (penetrance > 10%).

**Supplementary Table 10.** List of CNV-driven differentially expressed genes in SALS1 patients.

**Supplementary Table 11.** List of CNV-driven differentially expressed genes in SALS2 patients.

**Supplementary Table 12.** The top 15 functional enrichment of CNV-associated DEGs in SALS.

**Supplementary Table 13.** The signal pathway enrichment of CNV-associated DEGs.

**Supplementary Table 14.** Cluster random assignment of SALS patients.

### **Supplementary Materials and Methods**

**Gene selection and aCGH design strategy.** Our customized *NeuroArray v.2.0* aCGH platform was built to permit a high-density probe coverage in the coding region of clinically relevant genes associated with ALS (n=154). In order to perform a differential diagnosis with other neurological disorders, we also included genes related to other neurological conditions, such as Alzheimer's disease and other dementias, Parkinson's disease, Epilepsies, Rett Syndrome, Autosomal dominant and recessive Limb-Girdle Muscular Dystrophy, Muscular Duchenne/Becker Dystrophy, Hereditary Spastic Paraplegia, Spinocerebellar Ataxia, Neurofibromatosis, Tuberous sclerosis, Peripheral Neuropathy and Stroke.

The selection of genes included in the array, relied on our extensive expertise in clinics and genetics of neurological diseases and on updated literature data, has been extended to the entire

currently known sets of disease-linked genes collected in specific public databases available online, such as ALSgene (<http://www.alsgene.org/>), ALZgene (<http://www.alzgene.org/>), PDgene (<http://www.pdgene.org/>). The set of selected genes embraces known and putative risk factors, disease-causing genes, and other related genetic regions affected by different types of mutations was reported in the **Supplementary Table 2**.

The array design was carried out as previously described <sup>1</sup> by using the web-based Agilent SureDesign Software (Agilent Technologies, Santa Clara, CA). This web application allows to define regions of interest and select the “best-performing” probes from the High-Density (HD) Agilent probe library. Chromosomal coordinates of all RefSeq genes were extrapolated from open-source databases, Biomart (<http://www.biomart.org/>) and UCSC Genome Browser according to Human Feb. 2009 Assembly (GRCh37/hg19) (<http://genome.ucsc.edu>). Exon coordinates of neuro-related genes were selected and formatted using a homemade R script <sup>2</sup> and then uploaded on SureDesign. In particular, The exon coordinates were sorted and separated in to 3 bins: exons that were up to 150 bp (“small” group), 151-500 bp (“medium” group) and 500bp< (“large” group). For the small and medium groups, we have added 100 bp and 50 bp, respectively, each side of the interval in order to facilitate picking probes for smaller exons. For the large exon group, we performed search in SureDesign test server with The exon coordinates were sorted and separated in to 3 bins: exons that are up to 150 bp (“small” group), 151-500 bp (“medium” group) and 500bp< (“large” group). For the small and medium groups, we have added 100 bp and 50 bp, respectively, each side of the interval in order to facilitate accurate picking probes for smaller exons. Candidate probes (3 probes per interval) were scored and filtered using bioinformatics prediction criteria for probe sensitivity, specificity, and responsiveness under appropriate conditions. We also selected a limited number of probes (1109) with the SureDesign Genomic Tiling option to cover regions inadequately represented in the Agilent database. All probes had similar characteristics: isothermal probes, with melting temperature (T<sub>m</sub>) of 80° C and probe length of about 60-mers, in accordance to the manufacturer's specifications. Biological probes were randomly distributed in an 8x60K array format that allows to process simultaneously eight samples in a single experiment. The routinely used the Agilent Human CGH Replicate Probe Groups (5000 features) and 8700 probes scattered along the genome, with a probe density of around 1 probe every about 355 kb, that constituted the backbone were also included in the array design. Microarray slides were produced using Agilent's Sure-Print Inkjet technology (Agilent Technologies, Santa Clara, CA). The final design of the microarray included 44858 target-specific probes for 1099 selected genes with a median probe spacing of 310.102 kbp. Gene and locus positions are based on the Human Genome GRCh37 (hg19) assembly of UCSC genome browser.

**NeuroArray v.2.0 design**

|                                             |                                                                    |
|---------------------------------------------|--------------------------------------------------------------------|
| Total genes                                 | 1099                                                               |
| Genes in common among two or more disorders | 317                                                                |
| Total exonic targets                        | 16271                                                              |
| Target coverage                             | 99,5%                                                              |
| Total target size                           | 7.294275 Mb                                                        |
| Total probes                                | 44858                                                              |
| Total unique probes from HD Database        | 43749                                                              |
| Total unique probes by genomic tiling       | 1109                                                               |
| Median probe spacing                        | 310.102 Kbp                                                        |
| Mean target size                            | 448.2991211Kbp                                                     |
| Uncovered targets                           | 79                                                                 |
| Globally disease- targeted gene panels      | ALS, Epilepsies, RTT, LGMD, DMD/BMD, HSP, SCA, NF, TSC, PN, Stroke |

**Supplementary References**

1. La Cognata, V. *et al.* A customized high-resolution array-comparative genomic hybridization to explore copy number variations in Parkinson's disease. *Neurogenetics* **17**, 233–244 (2016).
2. Development Core Team, R. *R: A Language and Environment for Statistical Computing*. *R. Found. Stat. Comput.* **1**, (2011). URL [www.R-project.org/](http://www.R-project.org/)



# FIGURE LEGEND

## Enzymes

 Generic enzyme

## Kinase

 Generic kinase

 Protein kinase

## Phosphatase

 Generic phosphatase

## Protease

 Generic protease

 Metalloprotease

## Phospholipase

 Generic phospholipase

## Channels/Transporters

 Voltage-gated ion channel

 Transporter

 Ligand-gated ion channel

## Receptors

 Generic receptor

 GPCR

 Receptors with kinase activity

## Generic classes

 Generic binding protein

 Receptor ligand

 Compound

 Transcription factor

 Protein

## Objects on maps

 A complex or a group

 Drug

## G-protein Adaptor/Regulator

 G beta/gamma

 Regulators (GDI, GAP, GEF,...)

## Localization

 Extracellular

 Cytoplasm

 Nucleus

 EPR

 Mitochondria

 Golgi

## Mechanisms

 Binding

 Influence on expression

 Co-regulation of transcription

 Cleavage

 Phosphorylation

## Link Legend

 Positive effect

 Negative effect

 Unspecified effect

 Technical link

## CNV-GE deregulated level

 Up-regulation

 Down-regulation

SALS1/  
CTRL

SALS2/  
CTRL

**A.**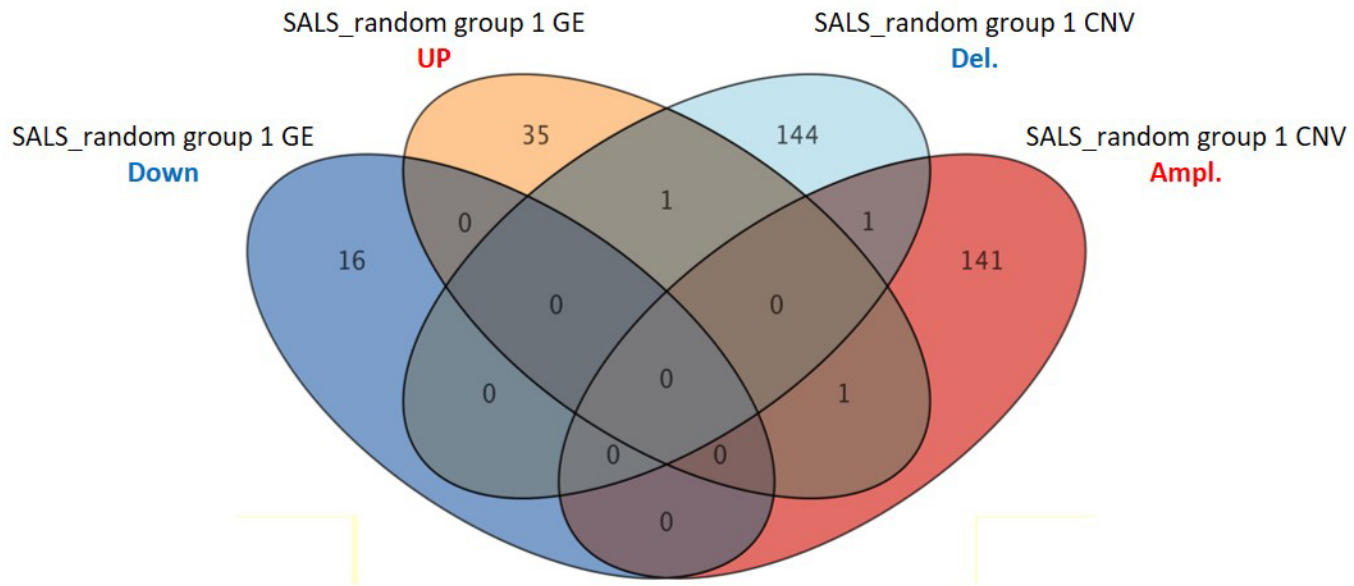**B.**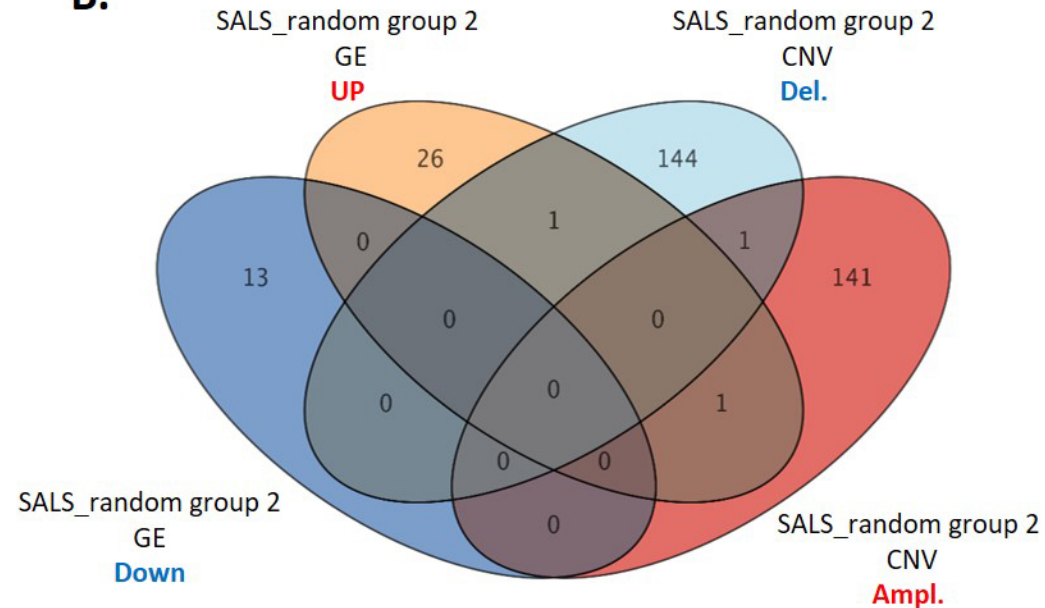

**Supplementary Table 1. General information of patients and individual controls.**

| Patient number | Ethnicity | Gender | Age (years) | PMI (hours) | Disease state | Survival from initial diagnosis (months) | Cluster assignment |
|----------------|-----------|--------|-------------|-------------|---------------|------------------------------------------|--------------------|
| 1              | caucasian | Male   | 31          | 8           | Control       | n/a                                      | Control            |
| 2              | caucasian | Male   | 59          | 7           | Control       | n/a                                      | Control            |
| 3              | caucasian | Male   | 68          | 8           | Control       | n/a                                      | Control            |
| 4              | caucasian | Female | 71          | 9           | Control       | n/a                                      | Control            |
| 5              | caucasian | Male   | 48          | 4           | Control       | n/a                                      | Control            |
| 6              | caucasian | Male   | 58          | 7           | Control       | n/a                                      | Control            |
| 7              | caucasian | Male   | 60          | 6.5         | Control       | n/a                                      | Control            |
| 8              | caucasian | Male   | 44          | 9           | Control       | n/a                                      | SALS 1             |
| 9              | caucasian | Male   | 73          | 10          | Control       | n/a                                      | SALS 2             |
| 10             | caucasian | Male   | 39          | 8           | Control       | n/a                                      | SALS 2             |
| 11             | caucasian | Male   | 67          | 8           | SALS          | 90                                       | SALS 1             |
| 12             | caucasian | Male   | 41          | 10          | SALS          | 96                                       | SALS 1             |
| 13             | caucasian | Male   | 65          | 6.5         | SALS          | 38                                       | SALS 1             |
| 14             | caucasian | Male   | 68          | 6           | SALS          | 30                                       | SALS 1             |
| 15             | caucasian | Female | 67          | 8           | SALS          | 27                                       | SALS 1             |
| 16             | caucasian | Male   | 43          | 6           | SALS          | 38                                       | SALS 1             |
| 17             | caucasian | Male   | 54          | 3           | SALS          | 31                                       | SALS 1             |
| 18             | caucasian | Male   | 38          | 7           | SALS          | 42                                       | SALS 1             |
| 19             | caucasian | Male   | 45          | 6.5         | SALS          | 38                                       | SALS 1             |
| 20             | caucasian | Female | 46          | 7           | SALS          | 31                                       | SALS 1             |
| 21             | caucasian | Female | 65          | 7           | SALS          | 52                                       | SALS 1             |
| 22             | caucasian | Male   | 54          | 8           | SALS          | 49                                       | SALS 1             |
| 23             | caucasian | Male   | 51          | 4           | SALS          | 60                                       | SALS 1             |
| 24             | caucasian | Male   | 69          | 10          | SALS          | 20                                       | SALS 1             |
| 25             | caucasian | Male   | 68          | 7           | SALS          | 18                                       | SALS 1             |
| 26             | caucasian | Female | 68          | 8           | SALS          | 22                                       | SALS 1             |
| 27             | caucasian | Male   | 61          | 3           | SALS          | 11                                       | SALS 1             |
| 29             | caucasian | Female | 40          | 5           | SALS          | 130                                      | SALS 2             |
| 30             | caucasian | Male   | 41          | 3           | SALS          | 72                                       | SALS 2             |
| 31             | caucasian | Female | 61          | 6           | SALS          | 43                                       | SALS 2             |
| 32             | caucasian | Female | 61          | 10          | SALS          | 29                                       | SALS 2             |
| 33             | caucasian | Female | 51          | 7           | SALS          | 29                                       | SALS 2             |
| 34             | caucasian | Male   | 63          | 7.5         | SALS          | 27                                       | SALS 2             |
| 35             | caucasian | Female | 70          | 4           | SALS          | 30                                       | SALS 2             |
| 36             | caucasian | Female | 69          | 9           | SALS          | 52                                       | SALS 2             |
| 37             | caucasian | Female | 64          | 5.3         | SALS          | 71                                       | SALS 2             |
| 38             | caucasian | Male   | 46          | 7.5         | SALS          | 48                                       | SALS 2             |
| 39             | caucasian | Male   | 55          | 6           | SALS          | 18                                       | SALS 2             |
| 40             | caucasian | Male   | 51          | 8           | SALS          | 23                                       | SALS 2             |
| 41             | caucasian | Male   | 59          | 8           | SALS          | 13                                       | SALS 2             |

Fresh-frozen motor cortex samples were obtained from the Department of Neuropathology of the Academic Medical Center, University of Amsterdam, The Netherlands. Control patients died from a non-neurological disease (myocardial infarction, renal failure, or pulmonary embolism). All patients included in the study displayed no signs of infection before death. Informed consent was obtained for the use of brain tissue and for access to medical records for research purposes, approval was obtained from the local ethical committees for medical research.

Supplementary Table 2. List of genes represented in the *NeuroArray* aCGH v.2.0 design.

| Gene name    | Gene description                                          | Chromosome | Gene start (bp) | Gene end (bp) | Size (bp) |
|--------------|-----------------------------------------------------------|------------|-----------------|---------------|-----------|
| A2M          | alpha-2-macroglobulin                                     | 12         | 9220260         | 9268825       | 48566     |
| A2M-AS1      | A2M antisense RNA 1 (head to head)                        | 12         | 9217773         | 9220651       | 2879      |
| A2MP1        | alpha-2-macroglobulin pseudogene 1                        | 12         | 9381129         | 9428413       | 47285     |
| A4GALT       | alpha 1,4-galactosyltransferase (P blood group)           | 22         | 43088127        | 43117304      | 29178     |
| A4GNT        | alpha-1,4-N-acetylglucosaminyltransferase                 | 3          | 137842560       | 137851229     | 8670      |
| AAK1         | AP2 associated kinase 1                                   | 2          | 69688532        | 69901481      | 212950    |
| AARS         | alanyl-tRNA synthetase                                    | 16         | 70286198        | 70323446      | 37249     |
| AATF         | apoptosis antagonizing transcription factor               | 17         | 35306175        | 35414171      | 107997    |
| AATK         | apoptosis associated tyrosine kinase                      | 17         | 79091095        | 79139877      | 48783     |
| ABCA1        | ATP binding cassette subfamily A member 1                 | 9          | 107543283       | 107690518     | 147236    |
| ABCA12       | ATP binding cassette subfamily A member 12                | 2          | 215796266       | 216003151     | 206886    |
| ABCA13       | ATP binding cassette subfamily A member 13                | 7          | 48211055        | 48687092      | 476038    |
| ABCA2        | ATP binding cassette subfamily A member 2                 | 9          | 139901686       | 139923367     | 21682     |
| ABCA3        | ATP binding cassette subfamily A member 3                 | 16         | 2325882         | 2390747       | 64866     |
| ABCA4        | ATP binding cassette subfamily A member 4                 | 1          | 94458393        | 94586688      | 128296    |
| ABCA6        | ATP binding cassette subfamily A member 6                 | 17         | 67074843        | 67138029      | 63187     |
| ABCB1        | ATP binding cassette subfamily B member 1                 | 7          | 87133175        | 87342611      | 209437    |
| ABCB11       | ATP binding cassette subfamily B member 11                | 2          | 169779448       | 169887832     | 108385    |
| ABCB4        | ATP binding cassette subfamily B member 4                 | 7          | 87031013        | 87109751      | 78739     |
| ABCB7        | ATP binding cassette subfamily B member 7                 | X          | 74273115        | 74376567      | 103453    |
| ABCC1        | ATP binding cassette subfamily C member 1                 | 16         | 16043434        | 16236931      | 193498    |
| ABCC4        | ATP binding cassette subfamily C member 4                 | 13         | 95672083        | 95953687      | 281605    |
| ABCC5        | ATP binding cassette subfamily C member 5                 | 3          | 183637722       | 183735803     | 98082     |
| ABCC6        | ATP binding cassette subfamily C member 6                 | 16         | 16242785        | 16317379      | 74595     |
| ABCC6P1      | ATP binding cassette subfamily C member 6 pseudogene 1    | 16         | 18582484        | 18609650      | 27167     |
| ABCC8        | ATP binding cassette subfamily C member 8                 | 11         | 17414432        | 17498449      | 84018     |
| ABCC9        | ATP binding cassette subfamily C member 9                 | 12         | 21950335        | 22094336      | 144002    |
| ABCD3        | ATP binding cassette subfamily D member 3                 | 1          | 94883933        | 94984222      | 100290    |
| ABCE1        | ATP binding cassette subfamily E member 1                 | 4          | 146019084       | 146050331     | 31248     |
| ABCG1        | ATP binding cassette subfamily G member 1                 | 21         | 43619799        | 43717354      | 97556     |
| ABCG4        | ATP binding cassette subfamily G member 4                 | 11         | 119019722       | 119033360     | 13639     |
| ABCG5        | ATP binding cassette subfamily G member 5                 | 2          | 44039611        | 44066004      | 26394     |
| ABHD14A-ACY1 | ABHD14A-ACY1 readthrough                                  | 3          | 52009066        | 52023199      | 14134     |
| ABHD17B      | abhydrolase domain containing 17B                         | 9          | 74477368        | 74525847      | 48480     |
| ABHD17C      | abhydrolase domain containing 17C                         | 15         | 80972025        | 81047962      | 75938     |
| ABHD2        | abhydrolase domain containing 2                           | 15         | 89630690        | 89745591      | 114902    |
| ABHD3        | abhydrolase domain containing 3                           | 18         | 19230858        | 19284766      | 53909     |
| ABL1         | ABL proto-oncogene 1, non-receptor tyrosine kinase        | 9          | 133589333       | 133763062     | 173730    |
| ABL2         | ABL proto-oncogene 2, non-receptor tyrosine kinase        | 1          | 179068462       | 179198819     | 130358    |
| ABLIM1       | actin binding LIM protein 1                               | 10         | 116190872       | 116444762     | 253891    |
| ABLIM2       | actin binding LIM protein family member 2                 | 4          | 7967039         | 8160559       | 193521    |
| ACACA        | acetyl-CoA carboxylase alpha                              | 17         | 35441923        | 35766909      | 324987    |
| ACAD11       | acyl-CoA dehydrogenase family member 11                   | 3          | 132276982       | 132379567     | 102586    |
| ACAD8        | acyl-CoA dehydrogenase family member 8                    | 11         | 134123389       | 134135749     | 12361     |
| ACADL        | acyl-CoA dehydrogenase, long chain                        | 2          | 211052663       | 211090215     | 37553     |
| ACADM        | acyl-CoA dehydrogenase, C-4 to C-12 straight chain        | 1          | 76190036        | 76253260      | 63225     |
| ACAN         | aggrecan                                                  | 15         | 89346674        | 89418585      | 71912     |
| ACAP2        | ArfGAP with coiled-coil, ankyrin repeat and PH domains 2  | 3          | 194995465       | 195163807     | 168343    |
| ACE          | angiotensin I converting enzyme                           | 17         | 61554422        | 61599205      | 44784     |
| ACE2         | angiotensin I converting enzyme 2                         | X          | 15579156        | 15620271      | 41116     |
| ACER3        | alkaline ceramidase 3                                     | 11         | 76571911        | 76737841      | 165931    |
| ACHE         | acetylcholinesterase (Cartwright blood group)             | 7          | 100487615       | 100494594     | 6980      |
| ACKR3        | atypical chemokine receptor 3                             | 2          | 237476430       | 237491001     | 14572     |
| ACMSD        | aminocarboxymuconate semialdehyde decarboxylase           | 2          | 135596117       | 135659604     | 63488     |
| ACO1         | aconitase 1                                               | 9          | 32384618        | 32454767      | 70150     |
| ACOX1        | acyl-CoA oxidase 1                                        | 17         | 73937588        | 73975515      | 37928     |
| ACOXL        | acyl-CoA oxidase like                                     | 2          | 111490150       | 111875799     | 385650    |
| ACSF2        | acyl-CoA synthetase family member 2                       | 17         | 48503519        | 48552206      | 48688     |
| ACTA2        | actin, alpha 2, smooth muscle, aorta                      | 10         | 90694831        | 90751147      | 56317     |
| ACTN4        | actinin alpha 4                                           | 19         | 39138289        | 39222223      | 83935     |
| ACTR3        | ARP3 actin related protein 3 homolog                      | 2          | 114647537       | 114720173     | 72637     |
| ACTR3C       | ARP3 actin-related protein 3 homolog C                    | 7          | 149941005       | 150020814     | 79810     |
| ACVR1B       | activin A receptor type 1B                                | 12         | 52345451        | 52390862      | 45412     |
| ACVR2B       | activin A receptor type 2B                                | 3          | 38495342        | 38534633      | 39292     |
| ADAM10       | ADAM metallopeptidase domain 10                           | 15         | 58887403        | 59042177      | 154775    |
| ADAM12       | ADAM metallopeptidase domain 12                           | 10         | 127700950       | 128077024     | 376075    |
| ADAM17       | ADAM metallopeptidase domain 17                           | 2          | 9628615         | 9695921       | 67307     |
| ADAM19       | ADAM metallopeptidase domain 19                           | 5          | 156822542       | 157002783     | 180242    |
| ADAM2        | ADAM metallopeptidase domain 2                            | 8          | 39601254        | 39695808      | 94555     |
| ADAM22       | ADAM metallopeptidase domain 22                           | 7          | 87563458        | 87832204      | 268747    |
| ADAM29       | ADAM metallopeptidase domain 29                           | 4          | 175750819       | 175899331     | 148513    |
| ADAM32       | ADAM metallopeptidase domain 32                           | 8          | 38964509        | 39142430      | 177922    |
| ADAM9        | ADAM metallopeptidase domain 9                            | 8          | 38854388        | 38962663      | 108276    |
| ADAMTS12     | ADAM metallopeptidase with thrombospondin type 1 motif 12 | 5          | 33523640        | 33892297      | 368658    |
| ADAMTS16     | ADAM metallopeptidase with thrombospondin type 1 motif 16 | 5          | 5140443         | 5320417       | 179975    |

|             |                                                                         |    |           |           |         |
|-------------|-------------------------------------------------------------------------|----|-----------|-----------|---------|
| ADAMTS17    | ADAM metallopeptidase with thrombospondin type 1 motif 17               | 15 | 100511794 | 100882210 | 370417  |
| ADAMTS18    | ADAM metallopeptidase with thrombospondin type 1 motif 18               | 16 | 77281710  | 77469011  | 187302  |
| ADAMTS19    | ADAM metallopeptidase with thrombospondin type 1 motif 19               | 5  | 128795958 | 129074376 | 278419  |
| ADAMTS20    | ADAM metallopeptidase with thrombospondin type 1 motif 2                | 5  | 178537852 | 178772431 | 234580  |
| ADAMTS22    | ADAM metallopeptidase with thrombospondin type 1 motif 20               | 12 | 43747669  | 43945724  | 198056  |
| ADAMTS6     | ADAM metallopeptidase with thrombospondin type 1 motif 6                | 5  | 64444563  | 64777747  | 333185  |
| ADAMTS9-AS2 | ADAMTS9 antisense RNA 2                                                 | 3  | 64670585  | 64997143  | 326559  |
| ADAMTSL1    | ADAMTS like 1                                                           | 9  | 18473892  | 18910948  | 437057  |
| ADAMTSL3    | ADAMTS like 3                                                           | 15 | 84322838  | 84708594  | 385757  |
| ADAP2       | ArfGAP with dual PH domains 2                                           | 17 | 29233362  | 29286340  | 52979   |
| ADAR        | adenosine deaminase, RNA specific                                       | 1  | 154554538 | 154600475 | 45938   |
| ADARB1      | adenosine deaminase, RNA specific B1                                    | 21 | 46493768  | 46646478  | 152711  |
| ADARB2      | adenosine deaminase, RNA specific B2 (inactive)                         | 10 | 1228073   | 1779670   | 551598  |
| ADCY1       | adenylate cyclase 1                                                     | 7  | 45613739  | 45762715  | 148977  |
| ADCY10      | adenylate cyclase 10, soluble                                           | 1  | 167778625 | 167883453 | 104829  |
| ADCY2       | adenylate cyclase 2                                                     | 5  | 7396321   | 7830194   | 433874  |
| ADCY5       | adenylate cyclase 5                                                     | 3  | 123001143 | 123168605 | 167463  |
| ADCY8       | adenylate cyclase 8                                                     | 8  | 131792547 | 132054672 | 262126  |
| ADCY9       | adenylate cyclase 9                                                     | 16 | 4003388   | 4166186   | 162799  |
| ADCYAP1R1   | ADCYAP receptor type I                                                  | 7  | 31092076  | 31151089  | 59014   |
| ADD3        | adducin 3                                                               | 10 | 111756126 | 111895323 | 139198  |
| ADGRG1      | adhesion G protein-coupled receptor G1                                  | 16 | 57653442  | 57698944  | 45503   |
| ADH1C       | alcohol dehydrogenase 1C (class I), gamma polypeptide                   | 4  | 100257649 | 100274184 | 16536   |
| ADH5        | alcohol dehydrogenase 5 (class III), chi polypeptide                    | 4  | 99992132  | 100009952 | 17821   |
| ADIPOR2     | adiponectin receptor 2                                                  | 12 | 1797740   | 1897844   | 100105  |
| ADK         | adenosine kinase                                                        | 10 | 75910960  | 76469061  | 558102  |
| ADNP        | activity dependent neuroprotector homeobox                              | 20 | 49505585  | 49547958  | 42374   |
| ADORA2B     | adenosine A2b receptor                                                  | 17 | 15848231  | 15879060  | 30830   |
| ADRA1A      | adrenoceptor alpha 1A                                                   | 8  | 26605667  | 26724790  | 119124  |
| ADRA1B      | adrenoceptor alpha 1B                                                   | 5  | 159343790 | 159399551 | 55762   |
| ADRA2A      | adrenoceptor alpha 2A                                                   | 10 | 112836790 | 112840658 | 3869    |
| ADRB1       | adrenoceptor beta 1                                                     | 10 | 115803806 | 115806667 | 2862    |
| ADRB2       | adrenoceptor beta 2                                                     | 5  | 148206156 | 148208196 | 2041    |
| ADRB3       | adrenoceptor beta 3                                                     | 8  | 37820516  | 37824483  | 3968    |
| ADSL        | adenylosuccinate lyase                                                  | 22 | 40742507  | 40786467  | 43961   |
| ADTRP       | androgen dependent TFPI regulating protein                              | 6  | 11712287  | 11807279  | 94993   |
| AEBP2       | AE binding protein 2                                                    | 12 | 19556979  | 19873735  | 316757  |
| AFAP1       | actin filament associated protein 1                                     | 4  | 7760441   | 7941653   | 181213  |
| AFAP1L2     | actin filament associated protein 1 like 2                              | 10 | 116054583 | 116164515 | 109933  |
| AFF1        | AF4/FMR2 family member 1                                                | 4  | 87856154  | 88062206  | 206053  |
| AFF2        | AF4/FMR2 family member 2                                                | X  | 147582139 | 148082193 | 500055  |
| AFF3        | AF4/FMR2 family member 3                                                | 2  | 100162323 | 100759201 | 596879  |
| AFG3L2      | AFG3 like matrix AAA peptidase subunit 2                                | 18 | 12328943  | 12377313  | 48371   |
| AFM         | afamin                                                                  | 4  | 74347400  | 74369691  | 22292   |
| AGAP1       | ArfGAP with GTPase domain, ankyrin repeat and PH domain 1               | 2  | 236402733 | 237040444 | 637712  |
| AGBL1       | ATP/GTP binding protein like 1                                          | 15 | 86685227  | 87572283  | 887057  |
| AGBL2       | ATP/GTP binding protein like 2                                          | 11 | 47681143  | 47736941  | 55799   |
| AGBL3       | ATP/GTP binding protein like 3                                          | 7  | 134671259 | 134832715 | 161457  |
| AGBL4       | ATP/GTP binding protein like 4                                          | 1  | 48998527  | 50489585  | 1491059 |
| AGER        | advanced glycosylation end-product specific receptor                    | 6  | 32148745  | 32152101  | 3357    |
| AGFG1       | ArfGAP with FG repeats 1                                                | 2  | 228336868 | 228425930 | 89063   |
| AGMO        | alkylglycerol monooxygenase                                             | 7  | 15239943  | 15601640  | 361698  |
| AGO3        | argonate 3, RISC catalytic component                                    | 1  | 36396319  | 36538101  | 141783  |
| AGO4        | argonate 4, RISC catalytic component                                    | 1  | 36273773  | 36323491  | 49719   |
| AGPAT4      | 1-acylglycerol-3-phosphate O-acyltransferase 4                          | 6  | 161551011 | 161695093 | 144083  |
| AGT         | angiotensinogen                                                         | 1  | 230838269 | 230850043 | 11775   |
| AGTPBP1     | ATP/GTP binding protein 1                                               | 9  | 88161455  | 88356944  | 195490  |
| AHCY        | adenosylhomocysteinase                                                  | 20 | 32868074  | 32899608  | 31535   |
| AHCYL1      | adenosylhomocysteinase like 1                                           | 1  | 110527308 | 110566357 | 39050   |
| AHCYL2      | adenosylhomocysteinase like 2                                           | 7  | 128864864 | 129070052 | 205189  |
| AHI1        | Abelson helper integration site 1                                       | 6  | 135604670 | 135818914 | 214245  |
| AHR         | aryl hydrocarbon receptor                                               | 7  | 17338246  | 17385776  | 47531   |
| AHRR        | aryl-hydrocarbon receptor repressor                                     | 5  | 304291    | 438406    | 134116  |
| AHSG        | alpha 2-HS glycoprotein                                                 | 3  | 186330712 | 186339107 | 8396    |
| AIG1        | androgen induced 1                                                      | 6  | 143381633 | 143661441 | 279809  |
| AIMP1       | aminoacyl tRNA synthetase complex interacting multifunctional protein 1 | 4  | 107236701 | 107270383 | 33683   |
| AK4         | adenylate kinase 4                                                      | 1  | 65613232  | 65697828  | 84597   |
| AK8         | adenylate kinase 8                                                      | 9  | 135600965 | 135754164 | 153200  |
| AKAP12      | A-kinase anchoring protein 12                                           | 6  | 151561134 | 151679692 | 118559  |
| AKAP13      | A-kinase anchoring protein 13                                           | 15 | 85923802  | 86292586  | 368785  |
| AKAP3       | A-kinase anchoring protein 3                                            | 12 | 4724674   | 4758213   | 33540   |
| AKAP4       | A-kinase anchoring protein 4                                            | X  | 49955406  | 49965664  | 10259   |
| AKAP6       | A-kinase anchoring protein 6                                            | 14 | 32798479  | 33300567  | 502089  |
| AKAP8L      | A-kinase anchoring protein 8 like                                       | 19 | 15490859  | 15529952  | 39094   |
| AKT1        | AKT serine/threonine kinase 1                                           | 14 | 105235686 | 105262088 | 26403   |
| AKT3        | AKT serine/threonine kinase 3                                           | 1  | 243651535 | 244014381 | 362847  |

|                    |                                                                                                         |    |           |           |         |
|--------------------|---------------------------------------------------------------------------------------------------------|----|-----------|-----------|---------|
| <b>ALAD</b>        | aminolevulinatase                                                                                       | 9  | 116148597 | 116163613 | 15017   |
| <b>ALB</b>         | albumin                                                                                                 | 4  | 74262831  | 74287129  | 24299   |
| <b>ALCAM</b>       | activated leukocyte cell adhesion molecule                                                              | 3  | 105085753 | 105295744 | 209992  |
| <b>ALDH1A2</b>     | aldehyde dehydrogenase 1 family member A2                                                               | 15 | 58245622  | 58790065  | 544444  |
| <b>ALDH1L1-AS2</b> | ALDH1L1 antisense RNA 2                                                                                 | 3  | 125898908 | 125929012 | 30105   |
| <b>ALDH2</b>       | aldehyde dehydrogenase 2 family (mitochondrial)                                                         | 12 | 112204691 | 112247782 | 43092   |
| <b>ALDH4A1</b>     | aldehyde dehydrogenase 4 family member A1                                                               | 1  | 19197926  | 19229275  | 31350   |
| <b>ALDH5A1</b>     | aldehyde dehydrogenase 5 family member A1                                                               | 6  | 24495080  | 24537435  | 42356   |
| <b>ALDH6A1</b>     | aldehyde dehydrogenase 6 family member A1                                                               | 14 | 74523553  | 74551196  | 27644   |
| <b>ALDH7A1</b>     | aldehyde dehydrogenase 7 family member A1                                                               | 5  | 125877533 | 125931110 | 53578   |
| <b>ALDH9A1</b>     | aldehyde dehydrogenase 9 family member A1                                                               | 1  | 165631453 | 165668100 | 36648   |
| <b>ALG1</b>        | ALG1, chitobiosyldiphosphodolichol beta-mannosyltransferase                                             | 16 | 5083703   | 5137380   | 53678   |
| <b>ALG11</b>       | ALG11, alpha-1,2-mannosyltransferase                                                                    | 13 | 52586534  | 52603800  | 17267   |
| <b>ALG12</b>       | ALG12, alpha-1,6-mannosyltransferase                                                                    | 22 | 50293877  | 50312106  | 18230   |
| <b>ALG13</b>       | ALG13, UDP-N-acetylglucosaminyltransferase subunit                                                      | X  | 110909043 | 111003877 | 94835   |
| <b>ALG2</b>        | ALG2, alpha-1,3/1,6-mannosyltransferase                                                                 | 9  | 101978708 | 101984238 | 5531    |
| <b>ALG3</b>        | ALG3, alpha-1,3- mannosyltransferase                                                                    | 3  | 183960089 | 183967336 | 7248    |
| <b>ALG6</b>        | ALG6, alpha-1,3-glucosyltransferase                                                                     | 1  | 63833261  | 63904233  | 70973   |
| <b>ALG8</b>        | ALG8, alpha-1,3-glucosyltransferase                                                                     | 11 | 77811982  | 77850706  | 38725   |
| <b>ALG9</b>        | ALG9, alpha-1,2-mannosyltransferase                                                                     | 11 | 111657010 | 111750149 | 93140   |
| <b>ALK</b>         | ALK receptor tyrosine kinase                                                                            | 2  | 29415640  | 30144432  | 728793  |
| <b>ALMS1</b>       | ALMS1, centrosome and basal body associated protein                                                     | 2  | 73612886  | 73837920  | 225035  |
| <b>ALOX5</b>       | arachidonate 5-lipoxygenase                                                                             | 10 | 45869661  | 45941561  | 71901   |
| <b>ALOX5AP</b>     | arachidonate 5-lipoxygenase activating protein                                                          | 13 | 31309645  | 31338556  | 28912   |
| <b>ALPK2</b>       | alpha kinase 2                                                                                          | 18 | 56148479  | 56296189  | 147711  |
| <b>ALPL</b>        | alkaline phosphatase, liver/bone/kidney                                                                 | 1  | 21835858  | 21904905  | 69048   |
| <b>ALS2</b>        | ALS2, alsin Rho guanine nucleotide exchange factor                                                      | 2  | 202565277 | 202645912 | 80636   |
| <b>AMBRA1</b>      | autophagy and beclin 1 regulator 1                                                                      | 11 | 46417964  | 46615675  | 197712  |
| <b>AMD1</b>        | adenosylmethionine decarboxylase 1                                                                      | 6  | 111195973 | 111216916 | 20944   |
| <b>AMFR</b>        | autocrine motility factor receptor                                                                      | 16 | 56395364  | 56459450  | 64087   |
| <b>AMIGO2</b>      | adhesion molecule with Ig like domain 2                                                                 | 12 | 47469490  | 47473734  | 4245    |
| <b>AMMECR1</b>     | Alport syndrome, mental retardation, midface hypoplasia and elliptocytosis<br>chromosomal region gene 1 | X  | 109437414 | 109683461 | 246048  |
| <b>AMPH</b>        | amphiphysin                                                                                             | 7  | 38423305  | 38671167  | 247863  |
| <b>AMT</b>         | aminomethyltransferase                                                                                  | 3  | 49454211  | 49460186  | 5976    |
| <b>AMY2B</b>       | amylase, alpha 2B (pancreatic)                                                                          | 1  | 104096437 | 104122156 | 25720   |
| <b>ANAPC13</b>     | anaphase promoting complex subunit 13                                                                   | 3  | 134196548 | 134205558 | 9011    |
| <b>ANG</b>         | angiogenin                                                                                              | 14 | 21152336  | 21167130  | 14795   |
| <b>ANGEL2</b>      | angel homolog 2                                                                                         | 1  | 213165524 | 213189168 | 23645   |
| <b>ANGPT1</b>      | angiopoietin 1                                                                                          | 8  | 108261721 | 108510283 | 248563  |
| <b>ANK1</b>        | ankyrin 1                                                                                               | 8  | 41510739  | 41754280  | 243542  |
| <b>ANK2</b>        | ankyrin 2                                                                                               | 4  | 113739265 | 114304896 | 565632  |
| <b>ANK3</b>        | ankyrin 3                                                                                               | 10 | 61786056  | 62493248  | 707193  |
| <b>ANKH</b>        | ANKH inorganic pyrophosphate transport regulator                                                        | 5  | 14704910  | 14871887  | 166978  |
| <b>ANKHD1</b>      | ankyrin repeat and KH domain containing 1                                                               | 5  | 139781399 | 139929163 | 147765  |
| <b>ANKMY1</b>      | ankyrin repeat and MYND domain containing 1                                                             | 2  | 241418839 | 241508626 | 89788   |
| <b>ANKRD11</b>     | ankyrin repeat domain 11                                                                                | 16 | 89334038  | 89556969  | 222932  |
| <b>ANKRD12</b>     | ankyrin repeat domain 12                                                                                | 18 | 9136226   | 9285983   | 149758  |
| <b>ANKRD13C</b>    | ankyrin repeat domain 13C                                                                               | 1  | 70726271  | 70820417  | 94147   |
| <b>ANKRD17</b>     | ankyrin repeat domain 17                                                                                | 4  | 73939093  | 74124515  | 185423  |
| <b>ANKRD20A2</b>   | ankyrin repeat domain 20 family member A2                                                               | 9  | 42368303  | 42411410  | 43108   |
| <b>ANKRD23</b>     | ankyrin repeat domain 23                                                                                | 2  | 97490263  | 97523671  | 33409   |
| <b>ANKRD27</b>     | ankyrin repeat domain 27                                                                                | 19 | 33087913  | 33167503  | 79591   |
| <b>ANKRD28</b>     | ankyrin repeat domain 28                                                                                | 3  | 15708743  | 15901278  | 192536  |
| <b>ANKRD30BP2</b>  | ankyrin repeat domain 30B pseudogene 2                                                                  | 21 | 14410481  | 14439354  | 28874   |
| <b>ANKRD36</b>     | ankyrin repeat domain 36                                                                                | 2  | 97779233  | 97930258  | 151026  |
| <b>ANKRD40</b>     | ankyrin repeat domain 40                                                                                | 17 | 48770551  | 48785285  | 14735   |
| <b>ANKRD46</b>     | ankyrin repeat domain 46                                                                                | 8  | 101521980 | 101572012 | 50033   |
| <b>ANKRD6</b>      | ankyrin repeat domain 6                                                                                 | 6  | 90142889  | 90343553  | 200665  |
| <b>ANKRD7</b>      | ankyrin repeat domain 7                                                                                 | 7  | 117854727 | 117882785 | 28059   |
| <b>ANKS1A</b>      | ankyrin repeat and sterile alpha motif domain containing 1A                                             | 6  | 34857042  | 35059179  | 202138  |
| <b>ANKS1B</b>      | ankyrin repeat and sterile alpha motif domain containing 1B                                             | 12 | 99120235  | 100378432 | 1258198 |
| <b>ANKS6</b>       | ankyrin repeat and sterile alpha motif domain containing 6                                              | 9  | 101493611 | 101559247 | 65637   |
| <b>ANKUB1</b>      | ankyrin repeat and ubiquitin domain containing 1                                                        | 3  | 149478892 | 149686172 | 207281  |
| <b>ANO10</b>       | anoctamin 10                                                                                            | 3  | 43396351  | 43733086  | 336736  |
| <b>ANO2</b>        | anoctamin 2                                                                                             | 12 | 5641035   | 6055398   | 414364  |
| <b>ANO3</b>        | anoctamin 3                                                                                             | 11 | 26210829  | 26684835  | 474007  |
| <b>ANO5</b>        | anoctamin 5                                                                                             | 11 | 22214722  | 22304903  | 90182   |
| <b>ANO6</b>        | anoctamin 6                                                                                             | 12 | 45609770  | 45834187  | 224418  |
| <b>ANO9</b>        | anoctamin 9                                                                                             | 11 | 417933    | 442011    | 24079   |
| <b>ANTXR1</b>      | anthrax toxin receptor 1                                                                                | 2  | 69240310  | 69476459  | 236150  |
| <b>ANTXRLP1</b>    | anthrax toxin receptor-like pseudogene 1                                                                | 10 | 47605211  | 47644793  | 39583   |
| <b>ANXA10</b>      | annexin A10                                                                                             | 4  | 169013666 | 169108841 | 95176   |
| <b>ANXA5</b>       | annexin A5                                                                                              | 4  | 122589110 | 122618268 | 29159   |
| <b>AOAH</b>        | acyloxyacyl hydrolase                                                                                   | 7  | 36552456  | 36764154  | 211699  |
| <b>AOC1</b>        | amine oxidase, copper containing 1                                                                      | 7  | 150521715 | 150558592 | 36878   |
| <b>AOX1</b>        | aldehyde oxidase 1                                                                                      | 2  | 201450591 | 201541787 | 91197   |

|                 |                                                                              |    |           |           |        |
|-----------------|------------------------------------------------------------------------------|----|-----------|-----------|--------|
| AP1B1           | adaptor related protein complex 1 beta 1 subunit                             | 22 | 29723669  | 29819168  | 95500  |
| AP1S2           | adaptor related protein complex 1 sigma 2 subunit                            | X  | 15843929  | 15873054  | 29126  |
| AP1S3           | adaptor related protein complex 1 sigma 3 subunit                            | 2  | 224616403 | 224702744 | 86342  |
| AP2A2           | adaptor related protein complex 2 alpha 2 subunit                            | 11 | 924894    | 1012239   | 87346  |
| AP2B1           | adaptor related protein complex 2 beta 1 subunit                             | 17 | 33905065  | 34053436  | 148372 |
| AP3B1           | adaptor related protein complex 3 beta 1 subunit                             | 5  | 77296349  | 77590579  | 294231 |
| AP3M1           | adaptor related protein complex 3 mu 1 subunit                               | 10 | 75881524  | 75910821  | 29298  |
| AP4B1           | adaptor related protein complex 4 beta 1 subunit                             | 1  | 114437370 | 114447823 | 10454  |
| AP4B1-AS1       | AP4B1 antisense RNA 1                                                        | 1  | 114399257 | 114443859 | 44603  |
| AP4E1           | adaptor related protein complex 4 epsilon 1 subunit                          | 15 | 51200869  | 51298097  | 97229  |
| AP4M1           | adaptor related protein complex 4 mu 1 subunit                               | 7  | 99699172  | 99707968  | 8797   |
| AP4S1           | adaptor related protein complex 4 sigma 1 subunit                            | 14 | 31494312  | 31562818  | 68507  |
| AP5Z1           | adaptor related protein complex 5 zeta 1 subunit                             | 7  | 4815253   | 4833943   | 18691  |
| APAF1           | apoptotic peptidase activating factor 1                                      | 12 | 99038919  | 99129204  | 90286  |
| APBA1           | amyloid beta precursor protein binding family A member 1                     | 9  | 72042446  | 72287222  | 244777 |
| APBA2           | amyloid beta precursor protein binding family A member 2                     | 15 | 29129629  | 29410518  | 280890 |
| APBB1           | amyloid beta precursor protein binding family B member 1                     | 11 | 6416355   | 6440644   | 24290  |
| APBB1IP         | amyloid beta precursor protein binding family B member 1 interacting protein | 10 | 26727132  | 26856732  | 129601 |
| APBB2           | amyloid beta precursor protein binding family B member 2                     | 4  | 40812044  | 41218731  | 406688 |
| <b>APCDD1</b>   | APC down-regulated 1                                                         | 18 | 10454625  | 10489945  | 35321  |
| APCDD1L-AS1     | APCDD1L antisense RNA 1 (head to head)                                       | 20 | 57090435  | 57194944  | 104510 |
| <b>APEX1</b>    | apurinic/aprimidinic endodeoxyribonuclease 1                                 | 14 | 20923350  | 20925927  | 2578   |
| APH1A           | aph-1 homolog A, gamma-secretase subunit                                     | 1  | 150237804 | 150241980 | 4177   |
| APH1B           | aph-1 homolog B, gamma-secretase subunit                                     | 15 | 63568217  | 63601325  | 33109  |
| APLP2           | amyloid beta precursor like protein 2                                        | 11 | 129939732 | 130014699 | 74968  |
| APMAP           | adipocyte plasma membrane associated protein                                 | 20 | 24943561  | 24973615  | 30055  |
| APOA1           | apolipoprotein A1                                                            | 11 | 116706467 | 116708666 | 2200   |
| APOA1-AS        | APOA1 antisense RNA                                                          | 11 | 116706833 | 116726445 | 19613  |
| APOA2           | apolipoprotein A2                                                            | 1  | 161192082 | 161193421 | 1340   |
| APOA5           | apolipoprotein A5                                                            | 11 | 116660083 | 116663136 | 3054   |
| APOB            | apolipoprotein B                                                             | 2  | 21224301  | 21266945  | 42645  |
| APOC1           | apolipoprotein C1                                                            | 19 | 45417504  | 45422606  | 5103   |
| APOC3           | apolipoprotein C3                                                            | 11 | 116700422 | 116703788 | 3367   |
| APOC4-APOC2     | APOC4-APOC2 readthrough (NMD candidate)                                      | 19 | 45445495  | 45452822  | 7328   |
| APOD            | apolipoprotein D                                                             | 3  | 195295573 | 195311076 | 15504  |
| <b>APOE</b>     | apolipoprotein E                                                             | 19 | 45409011  | 45412650  | 3640   |
| APOM            | apolipoprotein M                                                             | 6  | 31620193  | 31625987  | 5795   |
| APOO            | apolipoprotein O                                                             | X  | 23851470  | 23926057  | 74588  |
| APP             | amyloid beta precursor protein                                               | 21 | 27252861  | 27543446  | 290586 |
| APPBP2          | amyloid beta precursor protein binding protein 2                             | 17 | 58520520  | 58603580  | 83061  |
| APTX            | aprataxin                                                                    | 9  | 32972604  | 33025166  | 52563  |
| AQR             | aquarius intron-binding spliceosomal factor                                  | 15 | 35147732  | 35262040  | 114309 |
| <b>AR</b>       | androgen receptor                                                            | X  | 66764465  | 66950461  | 185997 |
| ARAF            | A-Raf proto-oncogene, serine/threonine kinase                                | X  | 47420516  | 47431307  | 10792  |
| AREL1           | apoptosis resistant E3 ubiquitin protein ligase 1                            | 14 | 75120140  | 75179818  | 59679  |
| ARFGEF1         | ADP ribosylation factor guanine nucleotide exchange factor 1                 | 8  | 68085747  | 68255912  | 170166 |
| ARHGAP10        | Rho GTPase activating protein 10                                             | 4  | 148653214 | 148993931 | 340718 |
| ARHGAP12        | Rho GTPase activating protein 12                                             | 10 | 32094365  | 32217742  | 123378 |
| ARHGAP15        | Rho GTPase activating protein 15                                             | 2  | 143848931 | 144525921 | 676991 |
| ARHGAP17        | Rho GTPase activating protein 17                                             | 16 | 24930706  | 25026987  | 96282  |
| <b>ARHGAP18</b> | Rho GTPase activating protein 18                                             | 6  | 129897277 | 130031370 | 134094 |
| ARHGAP20        | Rho GTPase activating protein 20                                             | 11 | 110447766 | 110583912 | 136147 |
| ARHGAP21        | Rho GTPase activating protein 21                                             | 10 | 24872538  | 25012597  | 140060 |
| ARHGAP22        | Rho GTPase activating protein 22                                             | 10 | 49654077  | 49864310  | 210234 |
| ARHGAP24        | Rho GTPase activating protein 24                                             | 4  | 86396267  | 86923823  | 527557 |
| ARHGAP26        | Rho GTPase activating protein 26                                             | 5  | 142149949 | 142608576 | 458628 |
| ARHGAP28        | Rho GTPase activating protein 28                                             | 18 | 6729717   | 6915715   | 185999 |
| ARHGAP32        | Rho GTPase activating protein 32                                             | 11 | 128834955 | 129149219 | 314265 |
| ARHGAP35        | Rho GTPase activating protein 35                                             | 19 | 47421933  | 47508334  | 86402  |
| ARHGAP44        | Rho GTPase activating protein 44                                             | 17 | 12692856  | 12894960  | 202105 |
| ARHGAP6         | Rho GTPase activating protein 6                                              | X  | 11136239  | 11683821  | 547583 |
| ARHGEF10        | Rho guanine nucleotide exchange factor 10                                    | 8  | 1772142   | 1906807   | 134666 |
| ARHGEF11        | Rho guanine nucleotide exchange factor 11                                    | 1  | 156904632 | 157015162 | 110531 |
| ARHGEF12        | Rho guanine nucleotide exchange factor 12                                    | 11 | 120207787 | 120360645 | 152859 |
| ARHGEF18        | Rho/Rac guanine nucleotide exchange factor 18                                | 19 | 7459999   | 7537363   | 77365  |
| <b>ARHGEF28</b> | Rho guanine nucleotide exchange factor 28                                    | 5  | 72921983  | 73237818  | 315836 |
| ARHGEF3         | Rho guanine nucleotide exchange factor 3                                     | 3  | 56761446  | 57113357  | 351912 |
| ARHGEF38        | Rho guanine nucleotide exchange factor 38                                    | 4  | 106473777 | 106629250 | 155474 |
| <b>ARHGEF4</b>  | Rho guanine nucleotide exchange factor 4                                     | 2  | 131594489 | 131804836 | 210348 |
| ARHGEF9         | Cdc42 guanine nucleotide exchange factor 9                                   | X  | 62854847  | 63005426  | 150580 |
| ARID1B          | AT-rich interaction domain 1B                                                | 6  | 157099063 | 157531913 | 432851 |
| ARID4B          | AT-rich interaction domain 4B                                                | 1  | 235294949 | 235491534 | 196586 |
| ARID5B          | AT-rich interaction domain 5B                                                | 10 | 63661059  | 63856703  | 195645 |
| ARIH1           | ariadne RBR E3 ubiquitin protein ligase 1                                    | 15 | 72766667  | 72879692  | 113026 |
| ARIH2           | ariadne RBR E3 ubiquitin protein ligase 2                                    | 3  | 48956254  | 49023815  | 67562  |
| ARL15           | ADP ribosylation factor like GTPase 15                                       | 5  | 53179775  | 53606412  | 426638 |



|               |                                                                                       |    |           |           |         |
|---------------|---------------------------------------------------------------------------------------|----|-----------|-----------|---------|
| ARMC3         | armadillo repeat containing 3                                                         | 10 | 23216953  | 23326518  | 109566  |
| ARMC9         | armadillo repeat containing 9                                                         | 2  | 232063260 | 232239548 | 176289  |
| ARNT          | aryl hydrocarbon receptor nuclear translocator                                        | 1  | 150782181 | 150849244 | 67064   |
| ARNT2         | aryl hydrocarbon receptor nuclear translocator 2                                      | 15 | 80696692  | 80890278  | 193587  |
| ARNTL2        | aryl hydrocarbon receptor nuclear translocator like 2                                 | 12 | 27485787  | 27576241  | 90455   |
| ARPC3         | actin related protein 2/3 complex subunit 3                                           | 12 | 110872630 | 110888227 | 15598   |
| ARPP21        | cAMP regulated phosphoprotein 21                                                      | 3  | 35680437  | 35835988  | 155552  |
| ARSA          | arylsulfatase A                                                                       | 22 | 51061182  | 51066607  | 5426    |
| ARSB          | arylsulfatase B                                                                       | 5  | 78073032  | 78281910  | 208879  |
| ARSG          | arylsulfatase G                                                                       | 17 | 66255323  | 66418872  | 163550  |
| ARSH          | arylsulfatase family member H                                                         | X  | 2924654   | 2951612   | 26959   |
| ARX           | aristaless related homeobox                                                           | X  | 25021811  | 25034065  | 12255   |
| ASAP1         | ArfGAP with SH3 domain, ankyrin repeat and PH domain 1                                | 8  | 131064353 | 131455906 | 391554  |
| ASAP3         | ArfGAP with SH3 domain, ankyrin repeat and PH domain 3                                | 1  | 23755056  | 23811061  | 56006   |
| ASB18         | ankyrin repeat and SOCS box containing 18                                             | 2  | 237102095 | 237173052 | 70958   |
| ASB3          | ankyrin repeat and SOCS box containing 3                                              | 2  | 53897430  | 54087297  | 189868  |
| ASB5          | ankyrin repeat and SOCS box containing 5                                              | 4  | 177134824 | 177198722 | 63899   |
| ASCC1         | activating signal cointegrator 1 complex subunit 1                                    | 10 | 73856278  | 73976892  | 120615  |
| ASCC3         | activating signal cointegrator 1 complex subunit 3                                    | 6  | 100956070 | 101329248 | 373179  |
| ASCL1         | achaete-scute family bHLH transcription factor 1                                      | 12 | 103351464 | 103354294 | 2831    |
| ASH1L         | ASH1 like histone lysine methyltransferase                                            | 1  | 155305059 | 155532598 | 227540  |
| ASIC2         | acid sensing ion channel subunit 2                                                    | 17 | 31340105  | 32501983  | 1161879 |
| ASIC5         | acid sensing ion channel subunit family member 5                                      | 4  | 156750881 | 156787425 | 36545   |
| ASNS          | asparagine synthetase (glutamine-hydrolyzing)                                         | 7  | 97481430  | 97501854  | 20425   |
| ASPSCR1       | ASPSCR1, UBX domain containing tether for SLC2A4                                      | 17 | 79934683  | 79975282  | 40600   |
| ASRGL1        | asparaginase like 1                                                                   | 11 | 62104920  | 62160882  | 55963   |
| ASTN1         | astrotactin 1                                                                         | 1  | 176826438 | 177134109 | 307672  |
| ASTN2         | astrotactin 2                                                                         | 9  | 119187504 | 120177348 | 989845  |
| ATE1          | arginyltransferase 1                                                                  | 10 | 123499939 | 123688316 | 188378  |
| ATF2          | activating transcription factor 2                                                     | 2  | 175936978 | 176033110 | 96133   |
| ATF3          | activating transcription factor 3                                                     | 1  | 212738676 | 212794119 | 55444   |
| ATF6          | activating transcription factor 6                                                     | 1  | 161736084 | 161933860 | 197777  |
| ATF7          | activating transcription factor 7                                                     | 12 | 53901640  | 54020199  | 118560  |
| ATF7IP        | activating transcription factor 7 interacting protein                                 | 12 | 14518610  | 14651697  | 133088  |
| ATG10         | autophagy related 10                                                                  | 5  | 81267844  | 81572676  | 304833  |
| ATG2B         | autophagy related 2B                                                                  | 14 | 96747595  | 96830207  | 82613   |
| <b>ATG7</b>   | autophagy related 7                                                                   | 3  | 11313995  | 11599139  | 285145  |
| ATL1          | atlastin GTPase 1                                                                     | 14 | 50999227  | 51099786  | 100560  |
| ATM           | ATM serine/threonine kinase                                                           | 11 | 108093211 | 108239829 | 146619  |
| ATN1          | atrophin 1                                                                            | 12 | 7033626   | 7051484   | 17859   |
| ATP10A        | ATPase phospholipid transporting 10A (putative)                                       | 15 | 25922420  | 26110317  | 187898  |
| ATP10B        | ATPase phospholipid transporting 10B (putative)                                       | 5  | 159990127 | 160279221 | 289095  |
| ATP11A        | ATPase phospholipid transporting 11A                                                  | 13 | 113344643 | 113541482 | 196840  |
| ATP11B        | ATPase phospholipid transporting 11B (putative)                                       | 3  | 182511288 | 182639423 | 128136  |
| ATP13A2       | ATPase 13A2                                                                           | 1  | 17312453  | 17338423  | 25971   |
| ATP13A5       | ATPase 13A5                                                                           | 3  | 192992579 | 193096632 | 104054  |
| ATP1A2        | ATPase Na <sup>+</sup> /K <sup>+</sup> transporting subunit alpha 2                   | 1  | 160085549 | 160113381 | 27833   |
| ATP1A3        | ATPase Na <sup>+</sup> /K <sup>+</sup> transporting subunit alpha 3                   | 19 | 42470734  | 42501649  | 30916   |
| ATP1B4        | ATPase Na <sup>+</sup> /K <sup>+</sup> transporting family member beta 4              | X  | 119495967 | 119516226 | 20260   |
| ATP2A2        | ATPase sarcoplasmic/endoplasmic reticulum Ca <sup>2+</sup> transporting 2             | 12 | 110718561 | 110788898 | 70338   |
| ATP5B         | ATP synthase, H <sup>+</sup> transporting, mitochondrial F1 complex, beta polypeptide | 12 | 57031959  | 57039798  | 7840    |
| ATP5E         | ATP synthase, H <sup>+</sup> transporting, mitochondrial F1 complex, epsilon subunit  | 20 | 57600522  | 57607437  | 6916    |
| ATP6AP2       | ATPase H <sup>+</sup> transporting accessory protein 2                                | X  | 40440146  | 40465889  | 25744   |
| ATP6VOA2      | ATPase H <sup>+</sup> transporting V0 subunit a2                                      | 12 | 124196865 | 124246302 | 49438   |
| ATP6V1H       | ATPase H <sup>+</sup> transporting V1 subunit H                                       | 8  | 54628117  | 54756118  | 128002  |
| ATP7A         | ATPase copper transporting alpha                                                      | X  | 77166194  | 77305892  | 139699  |
| ATP8A1        | ATPase phospholipid transporting 8A1                                                  | 4  | 42410390  | 42659122  | 248733  |
| ATP8A2        | ATPase phospholipid transporting 8A2                                                  | 13 | 25946209  | 26599989  | 653781  |
| ATP8B1        | ATPase phospholipid transporting 8B1                                                  | 18 | 55313658  | 55470333  | 156676  |
| ATP8B4        | ATPase phospholipid transporting 8B4 (putative)                                       | 15 | 50150435  | 50475014  | 324580  |
| ATP9A         | ATPase phospholipid transporting 9A (putative)                                        | 20 | 50213053  | 50385173  | 172121  |
| ATP9B         | ATPase phospholipid transporting 9B (putative)                                        | 18 | 76829285  | 77138283  | 308999  |
| ATPAF2        | ATP synthase mitochondrial F1 complex assembly factor 2                               | 17 | 17880723  | 17942523  | 61801   |
| ATRIP         | ATR interacting protein                                                               | 3  | 48488114  | 48507115  | 19002   |
| <b>ATRN</b>   | attractin                                                                             | 20 | 3451687   | 3631769   | 180083  |
| ATRN1L1       | attractin like 1                                                                      | 10 | 116853124 | 117708503 | 855380  |
| ATRX          | ATRX, chromatin remodeler                                                             | X  | 76760356  | 77041702  | 281347  |
| <b>ATXN1</b>  | ataxin 1                                                                              | 6  | 16299343  | 16761722  | 462380  |
| ATXN10        | ataxin 10                                                                             | 22 | 46067678  | 46241187  | 173510  |
| <b>ATXN2</b>  | ataxin 2                                                                              | 12 | 111890018 | 112037480 | 147463  |
| ATXN3         | ataxin 3                                                                              | 14 | 92524896  | 92572965  | 48070   |
| <b>ATXN3L</b> | ataxin 3 like                                                                         | X  | 13336770  | 13338518  | 1749    |
| ATXN7         | ataxin 7                                                                              | 3  | 63850233  | 63989138  | 138906  |
| ATXN7L1       | ataxin 7 like 1                                                                       | 7  | 105245514 | 105517050 | 271537  |
| ATXN8OS       | ATXN8 opposite strand (non-protein coding)                                            | 13 | 70681345  | 70713561  | 32217   |



|                |                                                                                      |    |           |           |         |
|----------------|--------------------------------------------------------------------------------------|----|-----------|-----------|---------|
| AUP1           | ancient ubiquitous protein 1                                                         | 2  | 74753772  | 74757066  | 3295    |
| AUTS2          | AUTS2, activator of transcription and developmental regulator                        | 7  | 69063905  | 70258054  | 1194150 |
| AVEN           | apoptosis and caspase activation inhibitor                                           | 15 | 34158428  | 34331377  | 172950  |
| AVL9           | AVL9 cell migration associated                                                       | 7  | 32535038  | 33078516  | 543479  |
| AXDND1         | axonemal dynein light chain domain containing 1                                      | 1  | 179334855 | 179523870 | 189016  |
| AXIN1          | axin 1                                                                               | 16 | 337440    | 402673    | 65234   |
| AZIN1          | antizyme inhibitor 1                                                                 | 8  | 103838585 | 103906092 | 67508   |
| B2M            | beta-2-microglobulin                                                                 | 15 | 45003675  | 45011075  | 7401    |
| B3GAT2         | beta-1,3-glucuronyltransferase 2                                                     | 6  | 71566382  | 71666741  | 100360  |
| B3GNT2         | UDP-GlcNAc:betaGal beta-1,3-N-acetylglucosaminyltransferase 2                        | 2  | 62423248  | 62451866  | 28619   |
| B3GNTL1        | UDP-GlcNAc:betaGal beta-1,3-N-acetylglucosaminyltransferase like 1                   | 17 | 80900031  | 81009686  | 109656  |
| B4GALT4        | beta-1,4-galactosyltransferase 4                                                     | 3  | 118930579 | 118959950 | 29372   |
| <b>B4GALT6</b> | beta-1,4-galactosyltransferase 6                                                     | 18 | 29202210  | 29265799  | 63590   |
| B9D1           | B9 domain containing 1                                                               | 17 | 19240867  | 19281495  | 40629   |
| BACE1          | beta-secretase 1                                                                     | 11 | 117156402 | 117186975 | 30574   |
| BACE2          | beta-site APP-cleaving enzyme 2                                                      | 21 | 42539728  | 42654445  | 114718  |
| BACH2          | BTB domain and CNC homolog 2                                                         | 6  | 90636248  | 91006627  | 370380  |
| BAD            | BCL2 associated agonist of cell death                                                | 11 | 64037302  | 64052176  | 14875   |
| BAG6           | BCL2 associated athanogene 6                                                         | 6  | 31606805  | 31620482  | 13678   |
| BAIAP2L1       | BAI1 associated protein 2 like 1                                                     | 7  | 97920963  | 98030380  | 109418  |
| BANK1          | B-cell scaffold protein with ankyrin repeats 1                                       | 4  | 102332443 | 102995969 | 663527  |
| BARD1          | BRCA1 associated RING domain 1                                                       | 2  | 215590370 | 215674428 | 84059   |
| BAX            | BCL2 associated X, apoptosis regulator                                               | 19 | 49458072  | 49465055  | 6984    |
| BAZ1B          | bromodomain adjacent to zinc finger domain 1B                                        | 7  | 72854728  | 72936608  | 81881   |
| BAZ2B          | bromodomain adjacent to zinc finger domain 2B                                        | 2  | 160175490 | 160473203 | 297714  |
| BBOX1          | gamma-butyrobetaine hydroxylase 1                                                    | 11 | 27062272  | 27149356  | 87085   |
| BBS4           | Bardet-Biedl syndrome 4                                                              | 15 | 72978527  | 73030817  | 52291   |
| BBS9           | Bardet-Biedl syndrome 9                                                              | 7  | 33168856  | 33645680  | 476825  |
| BBX            | BBX, HMG-box containing                                                              | 3  | 107241783 | 107530171 | 288389  |
| BCAR3          | breast cancer anti-estrogen resistance 3                                             | 1  | 94027347  | 94312706  | 285360  |
| BCAS1          | breast carcinoma amplified sequence 1                                                | 20 | 52553316  | 52687304  | 133989  |
| BCAS3          | BCAS3, microtubule associated cell migration factor                                  | 17 | 58754814  | 59470199  | 715386  |
| BCAT1          | branched chain amino acid transaminase 1                                             | 12 | 24964295  | 25102393  | 138099  |
| BCHE           | butyrylcholinesterase                                                                | 3  | 165490692 | 165555260 | 64569   |
| BCKDHB         | branched chain keto acid dehydrogenase E1 subunit beta                               | 6  | 80816364  | 81055987  | 239624  |
| <b>BCL11B</b>  | B-cell CLL/lymphoma 11B                                                              | 14 | 99635624  | 99737861  | 102238  |
| BCL2           | BCL2, apoptosis regulator                                                            | 18 | 60790579  | 60987361  | 196783  |
| BCL2L13        | BCL2 like 13                                                                         | 22 | 18111621  | 18213388  | 101768  |
| <b>BCL6</b>    | B-cell CLL/lymphoma 6                                                                | 3  | 187439165 | 187463515 | 24351   |
| BCL7A          | BCL tumor suppressor 7A                                                              | 12 | 122457328 | 122499948 | 42621   |
| BCR            | BCR, RhoGEF and GTPase activating protein                                            | 22 | 23521891  | 23660224  | 138334  |
| BCYRN1         | brain cytoplasmic RNA 1                                                              | 2  | 47558199  | 47571656  | 13458   |
| BDNF           | brain derived neurotrophic factor                                                    | 11 | 27676440  | 27743605  | 67166   |
| BDNF-AS        | BDNF antisense RNA                                                                   | 11 | 27528385  | 27719721  | 191337  |
| BDP1           | B double prime 1, subunit of RNA polymerase III transcription initiation factor IIIB | 5  | 70751442  | 70863649  | 112208  |
| BEAN1          | brain expressed associated with NEDD4 1                                              | 16 | 66461200  | 66527432  | 66233   |
| BECN1          | beclin 1                                                                             | 17 | 40962152  | 40985367  | 23216   |
| BEND4          | BEN domain containing 4                                                              | 4  | 42112955  | 42154895  | 41941   |
| BEND7          | BEN domain containing 7                                                              | 10 | 13480484  | 13570974  | 90491   |
| BEST1          | bestrophin 1                                                                         | 11 | 61717293  | 61732987  | 15695   |
| BEST3          | bestrophin 3                                                                         | 12 | 70037140  | 70093256  | 56117   |
| BEX5           | brain expressed X-linked 5                                                           | X  | 101408680 | 101411029 | 2350    |
| Bfsp2          | beaded filament structural protein 2                                                 | 3  | 133118839 | 133194066 | 75228   |
| BHMT           | betaine-homocysteine S-methyltransferase                                             | 5  | 78407602  | 78428108  | 20507   |
| BICC1          | BicC family RNA binding protein 1                                                    | 10 | 60272900  | 60591195  | 318296  |
| BICD1          | BICD cargo adaptor 1                                                                 | 12 | 32259769  | 32536567  | 276799  |
| BICD2          | BICD cargo adaptor 2                                                                 | 9  | 95473645  | 95527094  | 53450   |
| BIN1           | bridging integrator 1                                                                | 2  | 127805603 | 127864931 | 59329   |
| BIRC2          | baculoviral IAP repeat containing 2                                                  | 11 | 102217942 | 102249401 | 31460   |
| BIRC6          | baculoviral IAP repeat containing 6                                                  | 2  | 32582096  | 32843966  | 261871  |
| BLCAP          | bladder cancer associated protein                                                    | 20 | 36120874  | 36156333  | 35460   |
| BLM            | Bloom syndrome RecQ like helicase                                                    | 15 | 91260558  | 91358859  | 98302   |
| BLMH           | bleomycin hydrolase                                                                  | 17 | 28575218  | 28619074  | 43857   |
| BLOC1S5-TXNDC5 | BLOC1S5-TXNDC5 readthrough (NMD candidate)                                           | 6  | 7881755   | 8064597   | 182843  |
| BLVRA          | biliverdin reductase A                                                               | 7  | 43798279  | 43846939  | 48661   |
| BMP2K          | BMP2 inducible kinase                                                                | 4  | 79697496  | 79837526  | 140031  |
| BMP5           | bone morphogenetic protein 5                                                         | 6  | 55618443  | 55740362  | 121920  |
| BMP7           | bone morphogenetic protein 7                                                         | 20 | 55743804  | 55841685  | 97882   |
| BMPER          | BMP binding endothelial regulator                                                    | 7  | 33944523  | 34195484  | 250962  |
| BMPR1B         | bone morphogenetic protein receptor type 1B                                          | 4  | 95679119  | 96079599  | 400481  |
| BMPR2          | bone morphogenetic protein receptor type 2                                           | 2  | 203241659 | 203432474 | 190816  |
| BNC2           | basonudin 2                                                                          | 9  | 16409501  | 16870841  | 461341  |
| BOD1L1         | bioorientation of chromosomes in cell division 1 like 1                              | 4  | 13570362  | 13629347  | 58986   |
| BPTF           | bromodomain PHD finger transcription factor                                          | 17 | 65821640  | 65980494  | 158855  |
| BRAF           | B-Raf proto-oncogene, serine/threonine kinase                                        | 7  | 140419127 | 140624564 | 205438  |
| BRAP           | BRCA1 associated protein                                                             | 12 | 112079950 | 112123790 | 43841   |

|                  |                                                                  |    |           |           |        |
|------------------|------------------------------------------------------------------|----|-----------|-----------|--------|
| BRCA1            | BRCA1, DNA repair associated                                     | 17 | 41196312  | 41277500  | 81189  |
| BRD1             | bromodomain containing 1                                         | 22 | 50166931  | 50221160  | 54230  |
| BRD2             | bromodomain containing 2                                         | 6  | 32936437  | 32949282  | 12846  |
| BRD3             | bromodomain containing 3                                         | 9  | 136895427 | 136933657 | 38231  |
| BRF1             | BRF1, RNA polymerase III transcription initiation factor subunit | 14 | 105675623 | 105781926 | 106304 |
| BRINP3           | BMP/retinoic acid inducible neural specific 3                    | 1  | 190066792 | 190446759 | 379968 |
| BRPF3            | bromodomain and PHD finger containing 3                          | 6  | 36164521  | 36200567  | 36047  |
| BRWD1            | bromodomain and WD repeat domain containing 1                    | 21 | 40556102  | 40693485  | 137384 |
| BRWD3            | bromodomain and WD repeat domain containing 3                    | X  | 79926353  | 80065187  | 138835 |
| BSC2             | BSC2, seipin lipid droplet biogenesis associated                 | 11 | 62457747  | 62477317  | 19571  |
| BSN              | bassoon presynaptic cytomatrix protein                           | 3  | 49591922  | 49708978  | 117057 |
| BSPH1            | binder of sperm protein homolog 1                                | 19 | 48471303  | 48495427  | 24125  |
| BST1             | bone marrow stromal cell antigen 1                               | 4  | 15704573  | 15739936  | 35364  |
| BTBD11           | BTB domain containing 11                                         | 12 | 107712190 | 108053419 | 341230 |
| BTBD2            | BTB domain containing 2                                          | 19 | 1985447   | 2034880   | 49434  |
| BTBD8            | BTB domain containing 8                                          | 1  | 92545862  | 92613393  | 67532  |
| BTBD9            | BTB domain containing 9                                          | 6  | 38136227  | 38607924  | 471698 |
| BTG4             | BTG anti-proliferation factor 4                                  | 11 | 111338251 | 111383079 | 44829  |
| BTNL2            | butyrophilin like 2                                              | 6  | 32361740  | 32374905  | 13166  |
| BTRC             | beta-transducin repeat containing E3 ubiquitin protein ligase    | 10 | 103113820 | 103317078 | 203259 |
| BUB1             | BUB1 mitotic checkpoint serine/threonine kinase                  | 2  | 111395275 | 111435691 | 40417  |
| BUB1B            | BUB1 mitotic checkpoint serine/threonine kinase B                | 15 | 40453224  | 40513337  | 60114  |
| <b>BUB3</b>      | BUB3, mitotic checkpoint protein                                 | 10 | 124913793 | 124924886 | 11094  |
| BUD13            | BUD13 homolog                                                    | 11 | 116618886 | 116643704 | 24819  |
| BVES             | blood vessel epicardial substance                                | 6  | 105544697 | 105585049 | 40353  |
| C10orf107        | chromosome 10 open reading frame 107                             | 10 | 63422719  | 63526524  | 103806 |
| C10orf126        | chromosome 10 open reading frame 126                             | 10 | 29135337  | 29170827  | 35491  |
| C10orf55         | chromosome 10 open reading frame 55                              | 10 | 75669727  | 75682535  | 12809  |
| C10orf76         | chromosome 10 open reading frame 76                              | 10 | 103605356 | 103815950 | 210595 |
| C10orf90         | chromosome 10 open reading frame 90                              | 10 | 128113566 | 128359079 | 245514 |
| C11orf49         | chromosome 11 open reading frame 49                              | 11 | 46958240  | 47185936  | 227697 |
| C11orf53         | chromosome 11 open reading frame 53                              | 11 | 111126707 | 111157126 | 30420  |
| C11orf63         | chromosome 11 open reading frame 63                              | 11 | 122753391 | 122830506 | 77116  |
| C11orf70         | chromosome 11 open reading frame 70                              | 11 | 101918174 | 101955291 | 37118  |
| C12orf29         | chromosome 12 open reading frame 29                              | 12 | 88427623  | 88443937  | 16315  |
| C12orf42         | chromosome 12 open reading frame 42                              | 12 | 103631369 | 103889749 | 258381 |
| C12orf56         | chromosome 12 open reading frame 56                              | 12 | 64660217  | 64784972  | 124756 |
| C12orf65         | chromosome 12 open reading frame 65                              | 12 | 123717463 | 123742506 | 25044  |
| C14orf105        | chromosome 14 open reading frame 105                             | 14 | 57936019  | 57960585  | 24567  |
| C14orf159        | chromosome 14 open reading frame 159                             | 14 | 91526677  | 91691976  | 165300 |
| <b>C14orf177</b> | chromosome 14 open reading frame 177                             | 14 | 99177950  | 99184098  | 6149   |
| C14orf37         | chromosome 14 open reading frame 37                              | 14 | 58466453  | 58764857  | 298405 |
| C16orf52         | chromosome 16 open reading frame 52                              | 16 | 22018959  | 22098855  | 79897  |
| C16orf62         | chromosome 16 open reading frame 62                              | 16 | 19566562  | 19718115  | 151554 |
| C16orf89         | chromosome 16 open reading frame 89                              | 16 | 5094123   | 5116111   | 21989  |
| C17orf53         | chromosome 17 open reading frame 53                              | 17 | 42219274  | 42239844  | 20571  |
| C17orf97         | chromosome 17 open reading frame 97                              | 17 | 260118    | 273510    | 13393  |
| C18orf63         | chromosome 18 open reading frame 63                              | 18 | 71983048  | 72026422  | 43375  |
| C19orf12         | chromosome 19 open reading frame 12                              | 19 | 30191721  | 30206364  | 14644  |
| C1orf167         | chromosome 1 open reading frame 167                              | 1  | 11821844  | 11849642  | 27799  |
| C1orf21          | chromosome 1 open reading frame 21                               | 1  | 184356192 | 184598154 | 241963 |
| C1orf228         | chromosome 1 open reading frame 228                              | 1  | 45140364  | 45191263  | 50900  |
| C1orf87          | chromosome 1 open reading frame 87                               | 1  | 60452941  | 60539442  | 86502  |
| C1QTNF1          | C1q and TNF related 1                                            | 17 | 77018896  | 77045870  | 26975  |
| C1QTNF1-AS1      | C1QTNF1 antisense RNA 1                                          | 17 | 77015291  | 77023737  | 8447   |
| C1R              | complement C1r                                                   | 12 | 7187513   | 7245203   | 57691  |
| C1RL             | complement C1r subcomponent like                                 | 12 | 7242183   | 7261869   | 19687  |
| C2               | complement C2                                                    | 6  | 31865562  | 31913449  | 47888  |
| C20orf194        | chromosome 20 open reading frame 194                             | 20 | 3229951   | 3388272   | 158322 |
| <b>C21orf58</b>  | chromosome 21 open reading frame 58                              | 21 | 47720095  | 47743789  | 23695  |
| C22orf15         | chromosome 22 open reading frame 15                              | 22 | 24105208  | 24108048  | 2841   |
| C22orf34         | chromosome 22 open reading frame 34                              | 22 | 49808176  | 50051190  | 243015 |
| C2CD3            | C2 calcium dependent domain containing 3                         | 11 | 73723763  | 73882255  | 158493 |
| C2CD5            | C2 calcium dependent domain containing 5                         | 12 | 22601517  | 22697480  | 95964  |
| C2orf16          | chromosome 2 open reading frame 16                               | 2  | 27799389  | 27805588  | 6200   |
| C2orf76          | chromosome 2 open reading frame 76                               | 2  | 120059801 | 120124404 | 64604  |
| C2orf78          | chromosome 2 open reading frame 78                               | 2  | 74011316  | 74044274  | 32959  |
| C2orf88          | chromosome 2 open reading frame 88                               | 2  | 190744335 | 191068210 | 323876 |
| C3orf20          | chromosome 3 open reading frame 20                               | 3  | 14716606  | 14814541  | 97936  |
| C3orf33          | chromosome 3 open reading frame 33                               | 3  | 155480401 | 155524140 | 43740  |
| C3orf62          | chromosome 3 open reading frame 62                               | 3  | 49306035  | 49315342  | 9308   |
| C3orf67          | chromosome 3 open reading frame 67                               | 3  | 58703092  | 59035810  | 332719 |
| C3orf70          | chromosome 3 open reading frame 70                               | 3  | 184795838 | 184870802 | 74965  |
| C3P1             | complement component 3 precursor pseudogene                      | 19 | 10148479  | 10184811  | 36333  |
| C4A              | complement C4A (Rodgers blood group)                             | 6  | 31949801  | 31970458  | 20658  |
| C4orf22          | chromosome 4 open reading frame 22                               | 4  | 81256874  | 81884910  | 628037 |
| C5orf15          | chromosome 5 open reading frame 15                               | 5  | 133291201 | 133304478 | 13278  |

|                 |                                                               |    |           |           |         |
|-----------------|---------------------------------------------------------------|----|-----------|-----------|---------|
| C5orf42         | chromosome 5 open reading frame 42                            | 5  | 37106330  | 37249530  | 143201  |
| C5orf64         | chromosome 5 open reading frame 64                            | 5  | 60933535  | 61047590  | 114056  |
| C6              | complement C6                                                 | 5  | 41142336  | 41261540  | 119205  |
| C6orf106        | chromosome 6 open reading frame 106                           | 6  | 34555065  | 34664636  | 109572  |
| C6orf132        | chromosome 6 open reading frame 132                           | 6  | 42068856  | 42110357  | 41502   |
| C6orf89         | chromosome 6 open reading frame 89                            | 6  | 36839646  | 36896740  | 57095   |
| C8orf34         | chromosome 8 open reading frame 34                            | 8  | 69242957  | 69731257  | 488301  |
| C9orf24         | chromosome 9 open reading frame 24                            | 9  | 34379017  | 34397830  | 18814   |
| C9orf3          | chromosome 9 open reading frame 3                             | 9  | 97488983  | 97849441  | 360459  |
| <b>C9orf72</b>  | chromosome 9 open reading frame 72                            | 9  | 27546544  | 27573864  | 27321   |
| C9orf84         | chromosome 9 open reading frame 84                            | 9  | 114448453 | 114557288 | 108836  |
| CA10            | carbonic anhydrase 10                                         | 17 | 49707674  | 50237377  | 529704  |
| CA12            | carbonic anhydrase 12                                         | 15 | 63613577  | 63674360  | 60784   |
| CA13            | carbonic anhydrase 13                                         | 8  | 86132816  | 86196302  | 63487   |
| CA2             | carbonic anhydrase 2                                          | 8  | 86376081  | 86393722  | 17642   |
| CA5A            | carbonic anhydrase 5A                                         | 16 | 87921625  | 87970135  | 48511   |
| CA8             | carbonic anhydrase 8                                          | 8  | 61099906  | 61193971  | 94066   |
| CAAP1           | caspase activity and apoptosis inhibitor 1                    | 9  | 26840683  | 26892802  | 52120   |
| CAB39           | calcium binding protein 39                                    | 2  | 231577560 | 231685790 | 108231  |
| CAB39L          | calcium binding protein 39 like                               | 13 | 49882786  | 50018262  | 135477  |
| CABIN1          | calcineurin binding protein 1                                 | 22 | 24407642  | 24574596  | 166955  |
| CABP7           | calcium binding protein 7                                     | 22 | 30116073  | 30127828  | 11756   |
| CACHD1          | cache domain containing 1                                     | 1  | 64936428  | 65158741  | 222314  |
| CACNA1A         | calcium voltage-gated channel subunit alpha1 A                | 19 | 13317256  | 13734804  | 417549  |
| CACNA1B         | calcium voltage-gated channel subunit alpha1 B                | 9  | 140772241 | 141019076 | 246836  |
| CACNA1C         | calcium voltage-gated channel subunit alpha1 C                | 12 | 2079952   | 2802108   | 722157  |
| CACNA1D         | calcium voltage-gated channel subunit alpha1 D                | 3  | 53528683  | 53847760  | 319078  |
| CACNA1E         | calcium voltage-gated channel subunit alpha1 E                | 1  | 181382238 | 181777219 | 394982  |
| <b>CACNA1H</b>  | calcium voltage-gated channel subunit alpha1 H                | 16 | 1203241   | 1271771   | 68531   |
| <b>CACNA2D1</b> | calcium voltage-gated channel auxiliary subunit alpha2delta 1 | 7  | 81575760  | 82073114  | 497355  |
| CACNA2D3        | calcium voltage-gated channel auxiliary subunit alpha2delta 3 | 3  | 54156574  | 55108584  | 952011  |
| CACNB2          | calcium voltage-gated channel auxiliary subunit beta 2        | 10 | 18429606  | 18830798  | 401193  |
| CACNB4          | calcium voltage-gated channel auxiliary subunit beta 4        | 2  | 152689290 | 152955593 | 266304  |
| CACUL1          | CDK2 associated cullin domain 1                               | 10 | 120433679 | 120514761 | 81083   |
| CADM1           | cell adhesion molecule 1                                      | 11 | 115039938 | 115375675 | 335738  |
| CADM2           | cell adhesion molecule 2                                      | 3  | 85008132  | 86123579  | 1115448 |
| CADPS           | calcium dependent secretion activator                         | 3  | 62384022  | 62861054  | 477033  |
| CADPS2          | calcium dependent secretion activator 2                       | 7  | 121958481 | 122526813 | 568333  |
| CALB1           | calbindin 1                                                   | 8  | 91070836  | 91107703  | 36868   |
| CALCA           | calcitonin related polypeptide alpha                          | 11 | 14988214  | 14993900  | 5687    |
| CALCRL          | calcitonin receptor like receptor                             | 2  | 188207856 | 188313187 | 105332  |
| CALD1           | caldesmon 1                                                   | 7  | 134429003 | 134655479 | 226477  |
| CALHM1          | calcium homeostasis modulator 1                               | 10 | 105213144 | 105218645 | 5502    |
| <b>CALHM2</b>   | calcium homeostasis modulator 2                               | 10 | 105206543 | 105212660 | 6118    |
| <b>CALHM3</b>   | calcium homeostasis modulator 3                               | 10 | 105232561 | 105238997 | 6437    |
| CALML4          | calmodulin like 4                                             | 15 | 68483043  | 68498417  | 15375   |
| CALN1           | calneuron 1                                                   | 7  | 71244476  | 71912136  | 667661  |
| CAMK1D          | calcium/calmodulin dependent protein kinase ID                | 10 | 12391481  | 12877545  | 486065  |
| CAMK2D          | calcium/calmodulin dependent protein kinase II delta          | 4  | 114372188 | 114683083 | 310896  |
| CAMK2G          | calcium/calmodulin dependent protein kinase II gamma          | 10 | 75572259  | 75634343  | 62085   |
| CAMK4           | calcium/calmodulin dependent protein kinase IV                | 5  | 110559351 | 110830584 | 271234  |
| CAMKMT          | calmodulin-lysine N-methyltransferase                         | 2  | 44589089  | 44999731  | 410643  |
| CAMLG           | calcium modulating ligand                                     | 5  | 134074191 | 134087847 | 13657   |
| CAMSAP1         | calmodulin regulated spectrin associated protein 1            | 9  | 138700333 | 138799074 | 98742   |
| CAMTA1          | calmodulin binding transcription activator 1                  | 1  | 6845384   | 7829766   | 984383  |
| CAPN11          | calpain 11                                                    | 6  | 44126548  | 44152139  | 25592   |
| CAPN13          | calpain 13                                                    | 2  | 30945637  | 31043408  | 97772   |
| CAPN2           | calpain 2                                                     | 1  | 223889295 | 223963720 | 74426   |
| CAPN3           | calpain 3                                                     | 15 | 42640301  | 42704516  | 64216   |
| CAPRIN1         | cell cycle associated protein 1                               | 11 | 34073230  | 34122703  | 49474   |
| CAPRIN2         | caprin family member 2                                        | 12 | 30862486  | 30907885  | 45400   |
| CAPZA2          | capping actin protein of muscle Z-line alpha subunit 2        | 7  | 116451124 | 116562103 | 110980  |
| CARD11          | caspase recruitment domain family member 11                   | 7  | 2945775   | 3083579   | 137805  |
| CARD8           | caspase recruitment domain family member 8                    | 19 | 48684027  | 48759203  | 75177   |
| CASC11          | cancer susceptibility 11 (non-protein coding)                 | 8  | 128698588 | 128746213 | 47626   |
| CASC15          | cancer susceptibility 15 (non-protein coding)                 | 6  | 21665003  | 22214734  | 549732  |
| CASC2           | cancer susceptibility 2 (non-protein coding)                  | 10 | 119805790 | 119969663 | 163874  |
| CASC6           | cancer susceptibility 6 (non-protein coding)                  | 6  | 92339633  | 92400146  | 60514   |
| CASK            | calcium/calmodulin dependent serine protein kinase            | X  | 41374187  | 41782716  | 408530  |
| CASP2           | caspase 2                                                     | 7  | 142985308 | 143004789 | 19482   |
| CASP3           | caspase 3                                                     | 4  | 185548850 | 185570663 | 21814   |
| CASP4           | caspase 4                                                     | 11 | 104813593 | 104840163 | 26571   |
| CASP6           | caspase 6                                                     | 4  | 110609785 | 110624739 | 14955   |
| CASP8           | caspase 8                                                     | 2  | 202098166 | 202152434 | 54269   |
| CASP9           | caspase 9                                                     | 1  | 15817327  | 15853029  | 35703   |
| CASQ2           | calsequestrin 2                                               | 1  | 116242628 | 116311402 | 68775   |
| CASR            | calcium sensing receptor                                      | 3  | 121902530 | 122005342 | 102813  |

|                |                                            |    |           |           |         |
|----------------|--------------------------------------------|----|-----------|-----------|---------|
| CASS4          | Cas scaffolding protein family member 4    | 20 | 54987168  | 55034396  | 47229   |
| CAST           | calpastatin                                | 5  | 95860971  | 96115299  | 254329  |
| CASZ1          | castor zinc finger 1                       | 1  | 10696661  | 10856707  | 160047  |
| CAT            | catalase                                   | 11 | 34460472  | 34493609  | 33138   |
| CAV1           | caveolin 1                                 | 7  | 116164839 | 116201233 | 36395   |
| CAV3           | caveolin 3                                 | 3  | 8775486   | 8883492   | 108007  |
| CBFA2T2        | CBFA2/RUNX1 translocation partner 2        | 20 | 32077881  | 32237842  | 159962  |
| CBFA2T3        | CBFA2/RUNX1 translocation partner 3        | 16 | 88941266  | 89043612  | 102347  |
| CBFB           | core-binding factor beta subunit           | 16 | 67063019  | 67134961  | 71943   |
| CBL            | Cbl proto-oncogene                         | 11 | 119076752 | 119178859 | 102108  |
| CBS            | cystathionine-beta-synthase                | 21 | 44473301  | 44497053  | 23753   |
| CBWD5          | COBW domain containing 5                   | 9  | 70432004  | 70497240  | 65237   |
| CBWD6          | COBW domain containing 6                   | 9  | 69204538  | 69269662  | 65125   |
| CBX5           | chromobox 5                                | 12 | 54624724  | 54673886  | 49163   |
| CCBE1          | collagen and calcium binding EGF domains 1 | 18 | 57098172  | 57364612  | 266441  |
| CCDC102B       | coiled-coil domain containing 102B         | 18 | 66382446  | 66722426  | 339981  |
| CCDC117        | coiled-coil domain containing 117          | 22 | 29168662  | 29185283  | 16622   |
| CCDC12         | coiled-coil domain containing 12           | 3  | 46963216  | 47023500  | 60285   |
| CCDC120        | coiled-coil domain containing 120          | X  | 48911101  | 48927509  | 16409   |
| CCDC129        | coiled-coil domain containing 129          | 7  | 31553704  | 31698334  | 144631  |
| CCDC13         | coiled-coil domain containing 13           | 3  | 42734155  | 42814745  | 80591   |
| CCDC14         | coiled-coil domain containing 14           | 3  | 123616152 | 123680564 | 64413   |
| CCDC141        | coiled-coil domain containing 141          | 2  | 179694484 | 179914813 | 220330  |
| CCDC144A       | coiled-coil domain containing 144A         | 17 | 16592851  | 16707767  | 114917  |
| CCDC148        | coiled-coil domain containing 148          | 2  | 159027593 | 159313265 | 285673  |
| CCDC148-AS1    | CCDC148 antisense RNA 1                    | 2  | 159023162 | 159092681 | 69520   |
| CCDC149        | coiled-coil domain containing 149          | 4  | 24807739  | 24981826  | 174088  |
| CCDC152        | coiled-coil domain containing 152          | 5  | 42756903  | 42802462  | 45560   |
| CCDC158        | coiled-coil domain containing 158          | 4  | 77234154  | 77343021  | 108868  |
| CCDC167        | coiled-coil domain containing 167          | 6  | 37450696  | 37467698  | 17003   |
| CCDC169-SOHLH2 | CCDC169-SOHLH2 readthrough                 | 13 | 36742931  | 36871979  | 129049  |
| CGDC171        | coiled-coil domain containing 171          | 9  | 15552895  | 16061661  | 508767  |
| CCDC178        | coiled-coil domain containing 178          | 18 | 30517366  | 31021065  | 503700  |
| CCDC18         | coiled-coil domain containing 18           | 1  | 93645476  | 93744287  | 98812   |
| CCDC25         | coiled-coil domain containing 25           | 8  | 27590835  | 27630170  | 39336   |
| CCDC26         | CCDC26 long non-coding RNA                 | 8  | 130363937 | 130692485 | 328549  |
| CCDC3          | coiled-coil domain containing 3            | 10 | 12938627  | 13141652  | 203026  |
| CCDC59         | coiled-coil domain containing 59           | 12 | 82617460  | 82752584  | 135125  |
| CCDC6          | coiled-coil domain containing 6            | 10 | 61548521  | 61666414  | 117894  |
| CCDC7          | coiled-coil domain containing 7            | 10 | 32735068  | 32863492  | 128425  |
| <b>CCDC82</b>  | coiled-coil domain containing 82           | 11 | 96085933  | 96123087  | 37155   |
| CCDC85A        | coiled-coil domain containing 85A          | 2  | 56411258  | 56613308  | 202051  |
| CCDC92         | coiled-coil domain containing 92           | 12 | 124403207 | 124457378 | 54172   |
| CCK            | cholecystokinin                            | 3  | 42299317  | 42307699  | 8383    |
| CCKAR          | cholecystokinin A receptor                 | 4  | 26483022  | 26492084  | 9063    |
| CCKBR          | cholecystokinin B receptor                 | 11 | 6280966   | 6293357   | 12392   |
| CCL2           | C-C motif chemokine ligand 2               | 17 | 32582304  | 32584222  | 1919    |
| CCL3           | C-C motif chemokine ligand 3               | 17 | 34415602  | 34417515  | 1914    |
| CCL5           | C-C motif chemokine ligand 5               | 17 | 34198495  | 34207797  | 9303    |
| CCL8           | C-C motif chemokine ligand 8               | 17 | 32646055  | 32648421  | 2367    |
| <b>CCNA2</b>   | cyclin A2                                  | 4  | 122737599 | 122745087 | 7489    |
| CCNB1IP1       | cyclin B1 interacting protein 1            | 14 | 20779527  | 20801471  | 21945   |
| CCNB2          | cyclin B2                                  | 15 | 59397277  | 59417244  | 19968   |
| CCNH           | cyclin H                                   | 5  | 86687311  | 86708836  | 21526   |
| CCNT2-AS1      | CCNT2 antisense RNA 1                      | 2  | 135493034 | 135676280 | 183247  |
| CCNY           | cyclin Y                                   | 10 | 35535953  | 35860852  | 324900  |
| CCR2           | C-C motif chemokine receptor 2             | 3  | 46395225  | 46402419  | 7195    |
| CCR3           | C-C motif chemokine receptor 3             | 3  | 46205096  | 46308197  | 103102  |
| <b>CCS</b>     | copper chaperone for superoxide dismutase  | 11 | 66360292  | 66373490  | 13199   |
| CCSER1         | coiled-coil serine rich protein 1          | 4  | 91048686  | 92523064  | 1474379 |
| CCT4           | chaperonin containing TCP1 subunit 4       | 2  | 62095224  | 62115939  | 20716   |
| CCT5           | chaperonin containing TCP1 subunit 5       | 5  | 10250033  | 10266524  | 16492   |
| CD109          | CD109 molecule                             | 6  | 74405508  | 74538040  | 132533  |
| CD14           | CD14 molecule                              | 5  | 140011313 | 140013286 | 1974    |
| CD22           | CD22 molecule                              | 19 | 35810164  | 35838258  | 28095   |
| CD24           | CD24 molecule                              | 6  | 107417708 | 107422630 | 4923    |
| CD274          | CD274 molecule                             | 9  | 5450503   | 5470566   | 20064   |
| CD300LB        | CD300 molecule like family member b        | 17 | 72517313  | 72527613  | 10301   |
| CD33           | CD33 molecule                              | 19 | 51728320  | 51747115  | 18796   |
| CD36           | CD36 molecule                              | 7  | 79998891  | 80308593  | 309703  |
| CD3G           | CD3g molecule                              | 11 | 118215059 | 118225876 | 10818   |
| CD40           | CD40 molecule                              | 20 | 44746911  | 44758502  | 11592   |
| CD44           | CD44 molecule (Indian blood group)         | 11 | 35160417  | 35253949  | 93533   |
| CD86           | CD86 molecule                              | 3  | 121774213 | 121839983 | 65771   |
| CD96           | CD96 molecule                              | 3  | 111011566 | 111384597 | 373032  |
| CDA            | cytidine deaminase                         | 1  | 20915441  | 20945401  | 29961   |
| CDC14A         | cell division cycle 14A                    | 1  | 100810584 | 100985833 | 175250  |

|              |                                                            |    |           |           |         |
|--------------|------------------------------------------------------------|----|-----------|-----------|---------|
| CDC20        | cell division cycle 20                                     | 1  | 43824626  | 43828874  | 4249    |
| CDC25A       | cell division cycle 25A                                    | 3  | 48198636  | 48229892  | 31257   |
| CDC25B       | cell division cycle 25B                                    | 20 | 3767578   | 3786762   | 19185   |
| CDC25C       | cell division cycle 25C                                    | 5  | 137620954 | 137674044 | 53091   |
| CDC37L1      | cell division cycle 37 like 1                              | 9  | 4679559   | 4708398   | 28840   |
| CDC42        | cell division cycle 42                                     | 1  | 22379120  | 22419437  | 40318   |
| CDC42BPA     | CDC42 binding protein kinase alpha                         | 1  | 227177566 | 227506175 | 328610  |
| CDC42BPB     | CDC42 binding protein kinase beta                          | 14 | 103398716 | 103523799 | 125084  |
| CDC42SE2     | CDC42 small effector 2                                     | 5  | 130581186 | 130734140 | 152955  |
| CDC6         | cell division cycle 6                                      | 17 | 38443885  | 38459171  | 15287   |
| <b>CDCA2</b> | cell division cycle associated 2                           | 8  | 25316513  | 25365436  | 48924   |
| CDCP1        | CUB domain containing protein 1                            | 3  | 45123770  | 45187914  | 64145   |
| CDCP2        | CUB domain containing protein 2                            | 1  | 54598747  | 54619443  | 20697   |
| CDH1         | cadherin 1                                                 | 16 | 68771128  | 68869451  | 98324   |
| CDH12        | cadherin 12                                                | 5  | 21750782  | 22853731  | 1102950 |
| <b>CDH13</b> | cadherin 13                                                | 16 | 82660408  | 83830204  | 1169797 |
| CDH17        | cadherin 17                                                | 8  | 95139399  | 95229531  | 90133   |
| CDH18        | cadherin 18                                                | 5  | 19473060  | 20575982  | 1102923 |
| CDH2         | cadherin 2                                                 | 18 | 25530930  | 25757410  | 226481  |
| <b>CDH22</b> | cadherin 22                                                | 20 | 44802372  | 44937137  | 134766  |
| CDH23        | cadherin related 23                                        | 10 | 73156691  | 73575702  | 419012  |
| CDH3         | cadherin 3                                                 | 16 | 68670092  | 68756519  | 86428   |
| CDH4         | cadherin 4                                                 | 20 | 59827482  | 60515673  | 688192  |
| CDH6         | cadherin 6                                                 | 5  | 31193857  | 31329253  | 135397  |
| CDH8         | cadherin 8                                                 | 16 | 61681146  | 62070939  | 389794  |
| CDH9         | cadherin 9                                                 | 5  | 26880709  | 27121257  | 240549  |
| CDK1         | cyclin dependent kinase 1                                  | 10 | 62538089  | 62554610  | 16522   |
| CDK13        | cyclin dependent kinase 13                                 | 7  | 39989636  | 40136733  | 147098  |
| CDK14        | cyclin dependent kinase 14                                 | 7  | 90095738  | 90839905  | 744168  |
| CDK15        | cyclin dependent kinase 15                                 | 2  | 202655184 | 202760273 | 105090  |
| CDK16        | cyclin dependent kinase 16                                 | X  | 47077259  | 47089396  | 12138   |
| CDK5         | cyclin dependent kinase 5                                  | 7  | 150750899 | 150755617 | 4719    |
| CDK5R1       | cyclin dependent kinase 5 regulatory subunit 1             | 17 | 30813637  | 30818274  | 4638    |
| CDK6         | cyclin dependent kinase 6                                  | 7  | 92234235  | 92465908  | 231674  |
| CDKAL1       | CDK5 regulatory subunit associated protein 1 like 1        | 6  | 20534688  | 21232635  | 697948  |
| CDKL5        | cyclin dependent kinase like 5                             | X  | 18443703  | 18671749  | 228047  |
| CDKN2A       | cyclin dependent kinase inhibitor 2A                       | 9  | 21967751  | 21995300  | 27550   |
| CDKN3        | cyclin dependent kinase inhibitor 3                        | 14 | 54863567  | 54886936  | 23370   |
| CDON         | cell adhesion associated, oncogene regulated               | 11 | 125825691 | 125933230 | 107540  |
| CDS1         | CDP-diacylglycerol synthase 1                              | 4  | 85504132  | 85572491  | 68360   |
| CDYL         | chromodomain Y like                                        | 6  | 4706393   | 4955785   | 249393  |
| CEACAM21     | carcinoembryonic antigen related cell adhesion molecule 21 | 19 | 42055886  | 42093197  | 37312   |
| CEBPA-AS1    | CEBPA antisense RNA 1 (head to head)                       | 19 | 33793763  | 33795960  | 2198    |
| CELF1        | CUGBP Elav-like family member 1                            | 11 | 47487496  | 47587121  | 99626   |
| CELF2        | CUGBP Elav-like family member 2                            | 10 | 11047259  | 11378674  | 331416  |
| CENPE        | centromere protein E                                       | 4  | 104026963 | 104119566 | 92604   |
| CENPF        | centromere protein F                                       | 1  | 214776538 | 214837931 | 61394   |
| CENPP        | centromere protein P                                       | 9  | 95087766  | 95382815  | 295050  |
| CEP104       | centrosomal protein 104                                    | 1  | 3728645   | 3773778   | 45134   |
| CEP112       | centrosomal protein 112                                    | 17 | 63631656  | 64188202  | 556547  |
| CEP120       | centrosomal protein 120                                    | 5  | 122680579 | 122759286 | 78708   |
| CEP128       | centrosomal protein 128                                    | 14 | 80943330  | 81425861  | 482532  |
| CEP135       | centrosomal protein 135                                    | 4  | 56815037  | 56899529  | 84493   |
| CEP152       | centrosomal protein 152                                    | 15 | 49005125  | 49103343  | 98219   |
| CEP164       | centrosomal protein 164                                    | 11 | 117185273 | 117283984 | 98712   |
| CEP170       | centrosomal protein 170                                    | 1  | 243287730 | 243418650 | 130921  |
| CEP192       | centrosomal protein 192                                    | 18 | 12991361  | 13125051  | 133691  |
| CEP290       | centrosomal protein 290                                    | 12 | 88442793  | 88535993  | 93201   |
| CEP350       | centrosomal protein 350                                    | 1  | 179923873 | 180084015 | 160143  |
| CEP41        | centrosomal protein 41                                     | 7  | 130033612 | 130082274 | 48663   |
| CEP63        | centrosomal protein 63                                     | 3  | 134204585 | 134293859 | 89275   |
| CEP70        | centrosomal protein 70                                     | 3  | 138213186 | 138313380 | 100195  |
| CEP85L       | centrosomal protein 85 like                                | 6  | 118781935 | 119031238 | 249304  |
| CEP89        | centrosomal protein 89                                     | 19 | 33369902  | 33462897  | 92996   |
| CEPT1        | choline/ethanolamine phosphotransferase 1                  | 1  | 111682249 | 111727724 | 45476   |
| CERS3        | ceramide synthase 3                                        | 15 | 100940600 | 101085200 | 144601  |
| CERS6        | ceramide synthase 6                                        | 2  | 169312372 | 169631644 | 319273  |
| CETN4P       | centrin 4, pseudogene                                      | 4  | 123651703 | 123653348 | 1646    |
| CETP         | cholesteryl ester transfer protein                         | 16 | 56995762  | 57017757  | 21996   |
| CFB          | complement factor B                                        | 6  | 31895475  | 31919861  | 24387   |
| CFH          | complement factor H                                        | 1  | 196621008 | 196716634 | 95627   |
| CFHR4        | complement factor H related 4                              | 1  | 196819371 | 196888102 | 68732   |
| CFLAR        | CASP8 and FADD like apoptosis regulator                    | 2  | 201980827 | 202041410 | 60584   |
| CFTR         | cystic fibrosis transmembrane conductance regulator        | 7  | 117105838 | 117356025 | 250188  |
| CGNL1        | cingulin like 1                                            | 15 | 57668165  | 57842925  | 174761  |
| CH25H        | cholesterol 25-hydroxylase                                 | 10 | 90965694  | 90967071  | 1378    |
| CHAF1A       | chromatin assembly factor 1 subunit A                      | 19 | 4402659   | 4445015   | 42357   |

|                |                                                            |    |           |           |        |
|----------------|------------------------------------------------------------|----|-----------|-----------|--------|
| CHAT           | choline O-acetyltransferase                                | 10 | 50817141  | 50901925  | 84785  |
| <b>CHCHD10</b> | coiled-coil-helix-coiled-coil-helix domain containing 10   | 22 | 24108021  | 24110630  | 2610   |
| CHCHD3         | coiled-coil-helix-coiled-coil-helix domain containing 3    | 7  | 132469629 | 132766848 | 297220 |
| <b>CHCHD6</b>  | coiled-coil-helix-coiled-coil-helix domain containing 6    | 3  | 126423063 | 126679249 | 256187 |
| CHD2           | chromodomain helicase DNA binding protein 2                | 15 | 93426526  | 93571237  | 144712 |
| CHD5           | chromodomain helicase DNA binding protein 5                | 1  | 6161853   | 6240183   | 78331  |
| CHD6           | chromodomain helicase DNA binding protein 6                | 20 | 40030741  | 40247133  | 216393 |
| CHD7           | chromodomain helicase DNA binding protein 7                | 8  | 61591337  | 61779465  | 188129 |
| CHD8           | chromodomain helicase DNA binding protein 8                | 14 | 21853353  | 21924285  | 70933  |
| CHD9           | chromodomain helicase DNA binding protein 9                | 16 | 53088945  | 53363062  | 274118 |
| CHFR           | checkpoint with forkhead and ring finger domains           | 12 | 133398773 | 133532890 | 134118 |
| <b>CHGB</b>    | chromogranin B                                             | 20 | 5892076   | 5906007   | 13932  |
| CHIC2          | cysteine rich hydrophobic domain 2                         | 4  | 54875956  | 54930857  | 54902  |
| CHL1           | cell adhesion molecule L1 like                             | 3  | 238279    | 451090    | 212812 |
| CHM            | CHM, Rab escort protein 1                                  | X  | 85116185  | 85302566  | 186382 |
| CHMP1B2P       | charged multivesicular body protein 1B2, pseudogene        | X  | 79528830  | 79565669  | 36840  |
| <b>CHMP2B</b>  | charged multivesicular body protein 2B                     | 3  | 87276421  | 87304698  | 28278  |
| CHMP4B         | charged multivesicular body protein 4B                     | 20 | 32399110  | 32442172  | 43063  |
| CHN1           | chimerin 1                                                 | 2  | 175664091 | 175870097 | 206007 |
| CHODL          | chondrolectin                                              | 21 | 19273580  | 19639690  | 366111 |
| CHORDC1        | cysteine and histidine rich domain containing 1            | 11 | 89934328  | 89956532  | 22205  |
| CHP1           | calcineurin like EF-hand protein 1                         | 15 | 41523037  | 41574043  | 51007  |
| CHPT1          | choline phosphotransferase 1                               | 12 | 102090725 | 102137918 | 47194  |
| CHRD11         | chordin like 1                                             | X  | 109917084 | 110039286 | 122203 |
| CHRD12         | chordin like 2                                             | 11 | 74407474  | 74442430  | 34957  |
| CHRM1          | cholinergic receptor muscarinic 1                          | 11 | 62676151  | 62689279  | 13129  |
| CHRM2          | cholinergic receptor muscarinic 2                          | 7  | 136553416 | 136705002 | 151587 |
| CHRM3          | cholinergic receptor muscarinic 3                          | 1  | 239549865 | 240078750 | 528886 |
| CHRNA2         | cholinergic receptor nicotinic alpha 2 subunit             | 8  | 27317279  | 27337400  | 20122  |
| CHRNA3         | cholinergic receptor nicotinic alpha 3 subunit             | 15 | 78885394  | 78913637  | 28244  |
| CHRNA4         | cholinergic receptor nicotinic alpha 4 subunit             | 20 | 61975420  | 62009753  | 34334  |
| CHRNA5         | cholinergic receptor nicotinic alpha 5 subunit             | 15 | 78857862  | 78887611  | 29750  |
| CHRNA7         | cholinergic receptor nicotinic alpha 7 subunit             | 15 | 32322691  | 32464722  | 142032 |
| CHRN2          | cholinergic receptor nicotinic beta 2 subunit              | 1  | 154540257 | 154552502 | 12246  |
| CHST11         | carbohydrate sulfotransferase 11                           | 12 | 104849073 | 105155792 | 306720 |
| CHST15         | carbohydrate sulfotransferase 15                           | 10 | 125767184 | 125853206 | 86023  |
| CHST8          | carbohydrate sulfotransferase 8                            | 19 | 34112861  | 34264414  | 151554 |
| CHST9          | carbohydrate sulfotransferase 9                            | 18 | 24495595  | 24765281  | 269687 |
| CHSY1          | chondroitin sulfate synthase 1                             | 15 | 101715928 | 101792137 | 76210  |
| CIAPIN1        | cytokine induced apoptosis inhibitor 1                     | 16 | 57462081  | 57481440  | 19360  |
| CIDEA          | cell death-inducing DFFA-like effector a                   | 18 | 12254318  | 12277594  | 23277  |
| CIRBP          | cold inducible RNA binding protein                         | 19 | 1259384   | 1274879   | 15496  |
| CISH           | cytokine inducible SH2 containing protein                  | 3  | 50643921  | 50649262  | 5342   |
| CIZ1           | CDKN1A interacting zinc finger protein 1                   | 9  | 130928343 | 130966662 | 38320  |
| CKAP5          | cytoskeleton associated protein 5                          | 11 | 46764598  | 46867847  | 103250 |
| CKS1B          | CDC28 protein kinase regulatory subunit 1B                 | 1  | 154947129 | 154951725 | 4597   |
| CLASP1         | cytoplasmic linker associated protein 1                    | 2  | 122095352 | 122407163 | 311812 |
| CLASP2         | cytoplasmic linker associated protein 2                    | 3  | 33537737  | 33759848  | 222112 |
| CLCA3P         | chloride channel accessory 3, pseudogene                   | 1  | 87099956  | 87121059  | 21104  |
| CLCC1          | chloride channel CLIC like 1                               | 1  | 109472130 | 109506111 | 33982  |
| CLCN2          | chloride voltage-gated channel 2                           | 3  | 184063973 | 184079439 | 15467  |
| CLCN6          | chloride voltage-gated channel 6                           | 1  | 11866207  | 11903201  | 36995  |
| CLCNKA         | chloride voltage-gated channel Ka                          | 1  | 16345370  | 16360545  | 15176  |
| CLCNKB         | chloride voltage-gated channel Kb                          | 1  | 16370272  | 16383803  | 13532  |
| CLDN14         | claudin 14                                                 | 21 | 37832919  | 37948867  | 115949 |
| CLECSA         | C-type lectin domain containing 5A                         | 7  | 141627157 | 141646807 | 19651  |
| CLIC5          | chloride intracellular channel 5                           | 6  | 45868045  | 46048132  | 180088 |
| CLINT1         | clathrin interactor 1                                      | 5  | 157212751 | 157286183 | 73433  |
| CLIP1          | CAP-Gly domain containing linker protein 1                 | 12 | 122755979 | 122907179 | 151201 |
| CLIP4          | CAP-Gly domain containing linker protein family member 4   | 2  | 29320571  | 29412509  | 91939  |
| CLK2           | CDC like kinase 2                                          | 1  | 155232659 | 155248282 | 15624  |
| CLMP           | CXADR like membrane protein                                | 11 | 122943035 | 123065989 | 122955 |
| CLN3           | CLN3, battenin                                             | 16 | 28477983  | 28506896  | 28914  |
| CLN5           | ceroid-lipofuscinosis, neuronal 5                          | 13 | 77564795  | 77576652  | 11858  |
| CLN6           | ceroid-lipofuscinosis, neuronal 6, late infantile, variant | 15 | 68499330  | 68549549  | 50220  |
| CLN8           | CLN8, transmembrane ER and ERGIC protein                   | 8  | 1703944   | 1734738   | 30795  |
| CLOCK          | clock circadian regulator                                  | 4  | 56294070  | 56413305  | 119236 |
| CLPB           | ClpB homolog, mitochondrial AAA ATPase chaperonin          | 11 | 72003469  | 72145692  | 142224 |
| CLPTM1         | CLPTM1, transmembrane protein                              | 19 | 45457842  | 45496599  | 38758  |
| CLRN1-AS1      | CLRN1 antisense RNA 1                                      | 3  | 150570271 | 150798513 | 228243 |
| CLSTN2         | calsyntenin 2                                              | 3  | 139654027 | 140296239 | 642213 |
| CLTCL1         | clathrin heavy chain like 1                                | 22 | 19166986  | 19279239  | 112254 |
| CLU            | clusterin                                                  | 8  | 27454434  | 27472548  | 18115  |
| CLUL1          | clusterin like 1                                           | 18 | 596988    | 650334    | 53347  |
| CLVS1          | clavesin 1                                                 | 8  | 61969717  | 62414204  | 444488 |
| CLVS2          | clavesin 2                                                 | 6  | 123317116 | 123394072 | 76957  |
| CLYBL          | citrate lyase beta like                                    | 13 | 100258919 | 100549387 | 290469 |

|                |                                                                        |    |           |           |         |
|----------------|------------------------------------------------------------------------|----|-----------|-----------|---------|
| CMC2           | C-X9-C motif containing 2                                              | 16 | 81009698  | 81053875  | 44178   |
| CMIP           | c-Maf inducing protein                                                 | 16 | 81478775  | 81745367  | 266593  |
| CMPK2          | cytidine/uridine monophosphate kinase 2                                | 2  | 6980701   | 7006766   | 26066   |
| CMTM4          | CKLF like MARVEL transmembrane domain containing 4                     | 16 | 66648653  | 66730610  | 81958   |
| CNBD1          | cyclic nucleotide binding domain containing 1                          | 8  | 87878670  | 88627447  | 748778  |
| CNDP1          | carnosine dipeptidase 1                                                | 18 | 72201675  | 72254448  | 52774   |
| CNGB3          | cyclic nucleotide gated channel beta 3                                 | 8  | 87566205  | 87755903  | 189699  |
| CNIH1          | cornichon family AMPA receptor auxiliary protein 1                     | 14 | 54893654  | 54908149  | 14496   |
| CNKS2          | connector enhancer of kinase suppressor of Ras 2                       | X  | 21392536  | 21672813  | 280278  |
| CNNM2          | cyclin and CBS domain divalent metal cation transport mediator 2       | 10 | 104678050 | 104849978 | 171929  |
| CNOT1          | CCR4-NOT transcription complex subunit 1                               | 16 | 58553855  | 58663790  | 109936  |
| CNOT10         | CCR4-NOT transcription complex subunit 10                              | 3  | 32726637  | 32815367  | 88731   |
| CNOT4          | CCR4-NOT transcription complex subunit 4                               | 7  | 135046547 | 135194875 | 148329  |
| CNOT6          | CCR4-NOT transcription complex subunit 6                               | 5  | 179921412 | 180005405 | 83994   |
| CNOT6L         | CCR4-NOT transcription complex subunit 6 like                          | 4  | 78634541  | 78740769  | 106229  |
| CNR1           | cannabinoid receptor 1                                                 | 6  | 88849583  | 88876078  | 26496   |
| CNR2           | cannabinoid receptor 2                                                 | 1  | 24197016  | 24285549  | 88534   |
| CNTLN          | centlein                                                               | 9  | 17134980  | 17503921  | 368942  |
| CNTN2          | contactin 2                                                            | 1  | 205012325 | 205047627 | 35303   |
| CNTN3          | contactin 3                                                            | 3  | 74311719  | 74570291  | 258573  |
| <b>CNTN4</b>   | contactin 4                                                            | 3  | 2140497   | 3099645   | 959149  |
| CNTN5          | contactin 5                                                            | 11 | 98891683  | 100229616 | 1337934 |
| <b>CNTN6</b>   | contactin 6                                                            | 3  | 1134260   | 1445901   | 311642  |
| CNTNAP2        | contactin associated protein-like 2                                    | 7  | 145813453 | 148118090 | 2304638 |
| CNTNAP3        | contactin associated protein-like 3                                    | 9  | 39072764  | 39288312  | 215549  |
| CNTNAP4        | contactin associated protein like 4                                    | 16 | 76311176  | 76593135  | 281960  |
| CNTNAP5        | contactin associated protein like 5                                    | 2  | 124782864 | 125672864 | 890001  |
| CNTRL          | centriolin                                                             | 9  | 123837141 | 123939888 | 102748  |
| COBL           | cord-on-bleu WH2 repeat protein                                        | 7  | 51083909  | 51384515  | 300607  |
| COCH           | cochlin                                                                | 14 | 31343720  | 31364271  | 20552   |
| COG1           | component of oligomeric golgi complex 1                                | 17 | 71189129  | 71204646  | 15518   |
| COG2           | component of oligomeric golgi complex 2                                | 1  | 230778235 | 230829728 | 51494   |
| COG4           | component of oligomeric golgi complex 4                                | 16 | 70514471  | 70557468  | 42998   |
| COG5           | component of oligomeric golgi complex 5                                | 7  | 106842000 | 107204959 | 362960  |
| COG6           | component of oligomeric golgi complex 6                                | 13 | 40229764  | 40365802  | 136039  |
| COG7           | component of oligomeric golgi complex 7                                | 16 | 23399814  | 23464501  | 64688   |
| COG8           | component of oligomeric golgi complex 8                                | 16 | 69354043  | 69373570  | 19528   |
| COL11A1        | collagen type XI alpha 1 chain                                         | 1  | 103342023 | 103574052 | 232030  |
| COL11A2        | collagen type XI alpha 2 chain                                         | 6  | 33130458  | 33160276  | 29819   |
| COL14A1        | collagen type XIV alpha 1 chain                                        | 8  | 121072019 | 121384275 | 312257  |
| COL16A1        | collagen type XVI alpha 1 chain                                        | 1  | 32117848  | 32169920  | 52073   |
| COL18A1        | collagen type XVIII alpha 1 chain                                      | 21 | 46825052  | 46933634  | 108583  |
| COL19A1        | collagen type XIX alpha 1 chain                                        | 6  | 70576463  | 70919679  | 343217  |
| COL21A1        | collagen type XXI alpha 1 chain                                        | 6  | 55921388  | 56258892  | 337505  |
| COL22A1        | collagen type XXII alpha 1 chain                                       | 8  | 139600478 | 139926249 | 325772  |
| COL23A1        | collagen type XXIII alpha 1 chain                                      | 5  | 177664619 | 178017556 | 352938  |
| COL24A1        | collagen type XXIV alpha 1 chain                                       | 1  | 86194916  | 86622626  | 427711  |
| COL25A1        | collagen type XXV alpha 1 chain                                        | 4  | 109731877 | 110223813 | 491937  |
| COL26A1        | collagen type XXVI alpha 1 chain                                       | 7  | 101006101 | 101202304 | 196204  |
| COL27A1        | collagen type XXVII alpha 1 chain                                      | 9  | 116917840 | 117074791 | 156952  |
| COL28A1        | collagen type XXVIII alpha 1 chain                                     | 7  | 7395834   | 7575484   | 179651  |
| COL4A1         | collagen type IV alpha 1 chain                                         | 13 | 110801318 | 110959496 | 158179  |
| COL4A2         | collagen type IV alpha 2 chain                                         | 13 | 110958159 | 111165374 | 207216  |
| COL4A4         | collagen type IV alpha 4 chain                                         | 2  | 227867427 | 228028829 | 161403  |
| COL4A6         | collagen type IV alpha 6 chain                                         | X  | 107386780 | 107682727 | 295948  |
| COL6A3         | collagen type VI alpha 3 chain                                         | 2  | 238232646 | 238323018 | 90373   |
| COL6A5         | collagen type VI alpha 5 chain                                         | 3  | 130064359 | 130203688 | 139330  |
| COL6A6         | collagen type VI alpha 6 chain                                         | 3  | 130279178 | 130396999 | 117822  |
| COL9A1         | collagen type IX alpha 1 chain                                         | 6  | 70924764  | 71012786  | 88023   |
| <b>COLEC12</b> | collectin subfamily member 12                                          | 18 | 319361    | 500722    | 181362  |
| COLGALT2       | collagen beta(1-O)galactosyltransferase 2                              | 1  | 183898796 | 184006863 | 108068  |
| COMMD4         | COMM domain containing 4                                               | 15 | 75628232  | 75634268  | 6037    |
| COMT           | catechol-O-methyltransferase                                           | 22 | 19929130  | 19957498  | 28369   |
| COPA           | coatamer protein complex subunit alpha                                 | 1  | 160259063 | 160313190 | 54128   |
| COPB2          | coatamer protein complex subunit beta 2                                | 3  | 139074442 | 139108574 | 34133   |
| COP57B         | COP9 signalosome subunit 7B                                            | 2  | 232646381 | 232673963 | 27583   |
| COQ2           | coenzyme Q2, polyprenyltransferase                                     | 4  | 84182689  | 84206067  | 23379   |
| COQ6           | coenzyme Q6, monoxygenase                                              | 14 | 74416629  | 74430373  | 13745   |
| COQ9           | coenzyme Q9                                                            | 16 | 57481337  | 57495187  | 13851   |
| CORIN          | corin, serine peptidase                                                | 4  | 47596015  | 47840123  | 244109  |
| CORO1C         | coronin 1C                                                             | 12 | 109038885 | 109125372 | 86488   |
| COX10          | COX10, heme A:farnesyltransferase cytochrome c oxidase assembly factor | 17 | 13972813  | 14111994  | 139182  |
| COX10-AS1      | COX10 antisense RNA 1                                                  | 17 | 13659795  | 13972812  | 313018  |
| COX15          | COX15, cytochrome c oxidase assembly homolog                           | 10 | 101471601 | 101491857 | 20257   |
| COX16          | COX16, cytochrome c oxidase assembly homolog                           | 14 | 70791798  | 70826448  | 34651   |
| COX7B2         | cytochrome c oxidase subunit 7B2                                       | 4  | 46736844  | 46911252  | 174409  |

|            |                                                             |    |           |           |         |
|------------|-------------------------------------------------------------|----|-----------|-----------|---------|
| CP         | ceruloplasmin                                               | 3  | 148880197 | 148939842 | 59646   |
| CPA6       | carboxypeptidase A6                                         | 8  | 68334360  | 68658620  | 324261  |
| CPAMD8     | C3 and PZP like, alpha-2-macroglobulin domain containing 8  | 19 | 17003758  | 17137625  | 133868  |
| CPD        | carboxypeptidase D                                          | 17 | 28705923  | 28797007  | 91085   |
| CPE        | carboxypeptidase E                                          | 4  | 166282346 | 166419472 | 137127  |
| CPEB1      | cytoplasmic polyadenylation element binding protein 1       | 15 | 83211951  | 83317612  | 105662  |
| CPEB3      | cytoplasmic polyadenylation element binding protein 3       | 10 | 93806449  | 94050844  | 244396  |
| CPEB4      | cytoplasmic polyadenylation element binding protein 4       | 5  | 173315283 | 173388979 | 73697   |
| CPED1      | cadherin like and PC-esterase domain containing 1           | 7  | 120628731 | 120937498 | 308768  |
| CPNE4      | copine 4                                                    | 3  | 131252399 | 132004254 | 751856  |
| CPPED1     | calcineurin like phosphoesterase domain containing 1        | 16 | 12756919  | 12897874  | 140956  |
| CPQ        | carboxypeptidase Q                                          | 8  | 97657455  | 98161882  | 504428  |
| CPS1       | carbamoyl-phosphate synthase 1                              | 2  | 211342406 | 211543831 | 201426  |
| CPSF6      | cleavage and polyadenylation specific factor 6              | 12 | 69633317  | 69668138  | 34822   |
| CPT2       | carnitine palmitoyltransferase 2                            | 1  | 53662101  | 53679869  | 17769   |
| CPVL       | carboxypeptidase, vitellogenic like                         | 7  | 29034847  | 29235067  | 200221  |
| CPXM2      | carboxypeptidase X, M14 family member 2                     | 10 | 125465723 | 125699783 | 234061  |
| CPZ        | carboxypeptidase Z                                          | 4  | 8594387   | 8621488   | 27102   |
| CR1        | complement C3b/C4b receptor 1 (Knops blood group)           | 1  | 207669492 | 207813992 | 144501  |
| CR2        | complement C3d receptor 2                                   | 1  | 207627575 | 207663240 | 35666   |
| CRADD      | CASP2 and RIPK1 domain containing adaptor with death domain | 12 | 94071151  | 94288616  | 217466  |
| CREB1      | cAMP responsive element binding protein 1                   | 2  | 208394461 | 208468155 | 73695   |
| CREB5      | cAMP responsive element binding protein 5                   | 7  | 28338940  | 28865511  | 526572  |
| CREBBP     | CREB binding protein                                        | 16 | 3775055   | 3930727   | 155673  |
| CRH        | corticotropin releasing hormone                             | 8  | 67088620  | 67090960  | 2341    |
| CRIM1      | cysteine rich transmembrane BMP regulator 1                 | 2  | 36583069  | 36778278  | 195210  |
| CRISPLD1   | cysteine rich secretory protein LCCL domain containing 1    | 8  | 75896750  | 75946793  | 50044   |
| CRLF3      | cytokine receptor like factor 3                             | 17 | 29096406  | 29151794  | 55389   |
| CRMP1      | collapsin response mediator protein 1                       | 4  | 5749811   | 5894785   | 144975  |
| CRP        | C-reactive protein                                          | 1  | 159682079 | 159684379 | 2301    |
| CRTC3      | CREB regulated transcription coactivator 3                  | 15 | 91073157  | 91188577  | 115421  |
| CRY2       | cryptochrome circadian clock 2                              | 11 | 45868669  | 45904798  | 36130   |
| CRYL1      | crystallin lambda 1                                         | 13 | 20977806  | 21099996  | 122191  |
| CRYM       | crystallin mu                                               | 16 | 21250195  | 21314404  | 64210   |
| CSF1       | colony stimulating factor 1                                 | 1  | 110452864 | 110473614 | 20751   |
| CSGALNACT2 | chondroitin sulfate N-acetylgalactosaminyltransferase 2     | 10 | 43633934  | 43680756  | 46823   |
| CSK        | CSK, non-receptor tyrosine kinase                           | 15 | 75074398  | 75095539  | 21142   |
| CSMD1      | CUB and Sushi multiple domains 1                            | 8  | 2792875   | 4852494   | 2059620 |
| CSMD2      | CUB and Sushi multiple domains 2                            | 1  | 33979609  | 34631443  | 651835  |
| CSMD3      | CUB and Sushi multiple domains 3                            | 8  | 113235157 | 114449328 | 1214172 |
| CSNK1A1    | casein kinase 1 alpha 1                                     | 5  | 148871760 | 148931007 | 59248   |
| CSNK1D     | casein kinase 1 delta                                       | 17 | 80196899  | 80231607  | 34709   |
| CSNK1G1    | casein kinase 1 gamma 1                                     | 15 | 64457716  | 64648442  | 190727  |
| CSNK1G3    | casein kinase 1 gamma 3                                     | 5  | 122847793 | 122952739 | 104947  |
| CSNK2A1    | casein kinase 2 alpha 1                                     | 20 | 459116    | 524465    | 65350   |
| CSNK2A2    | casein kinase 2 alpha 2                                     | 16 | 58191811  | 58231824  | 40014   |
| CSRP1      | cysteine and glycine rich protein 1                         | 1  | 201452658 | 201478584 | 25927   |
| CST3       | cystatin C                                                  | 20 | 23608534  | 23619110  | 10577   |
| CSTB       | cystatin B                                                  | 21 | 45192393  | 45196326  | 3934    |
| CSTF3      | cleavage stimulation factor subunit 3                       | 11 | 33098734  | 33183917  | 85184   |
| CTAGE5     | CTAGE family member 5, ER export factor                     | 14 | 39734488  | 39856156  | 121669  |
| CTBP2      | C-terminal binding protein 2                                | 10 | 126676421 | 126849739 | 173319  |
| CTCF       | CCCTC-binding factor                                        | 16 | 67596310  | 67673086  | 76777   |
| CTCF1      | CCCTC-binding factor like                                   | 20 | 56071035  | 56100708  | 29674   |
| CTDP1      | CTD phosphatase subunit 1                                   | 18 | 77439801  | 77514510  | 74710   |
| CTDSPL2    | CTD small phosphatase like 2                                | 15 | 44719432  | 44821236  | 101805  |
| CTNNA1     | catenin alpha 1                                             | 5  | 137946656 | 138270723 | 324068  |
| CTNNA2     | catenin alpha 2                                             | 2  | 79412357  | 80875905  | 1463549 |
| CTNNA3     | catenin alpha 3                                             | 10 | 67672276  | 69455927  | 1783652 |
| CTNND2     | catenin delta 2                                             | 5  | 10971952  | 11904155  | 932204  |
| CTPS1      | CTP synthase 1                                              | 1  | 41445007  | 41478235  | 33229   |
| CTPS2      | CTP synthase 2                                              | X  | 16606126  | 16731059  | 124934  |
| CTSB       | cathepsin B                                                 | 8  | 11700033  | 11726957  | 26925   |
| CTSD       | cathepsin D                                                 | 11 | 1773982   | 1785222   | 11241   |
| CTSF       | cathepsin F                                                 | 11 | 66330934  | 66336312  | 5379    |
| CTSS       | cathepsin S                                                 | 1  | 150702672 | 150738433 | 35762   |
| CTTNBP2NL  | CTTNBP2 N-terminal like                                     | 1  | 112938803 | 113006078 | 67276   |
| CUBN       | cubilin                                                     | 10 | 16865963  | 17171830  | 305868  |
| CUEDC1     | CUE domain containing 1                                     | 17 | 55938604  | 56032684  | 94081   |
| CUL2       | cullin 2                                                    | 10 | 35297479  | 35379570  | 82092   |
| CUL3       | cullin 3                                                    | 2  | 225334867 | 225450110 | 115244  |
| CUL4B      | cullin 4B                                                   | X  | 119658464 | 119709649 | 51186   |
| CUL5       | cullin 5                                                    | 11 | 107879459 | 107978503 | 99045   |
| CUX1       | cut like homeobox 1                                         | 7  | 101458959 | 101927249 | 468291  |
| CUX2       | cut like homeobox 2                                         | 12 | 111471828 | 111788358 | 316531  |
| CWC25      | CWC25 spliceosome associated protein homolog                | 17 | 36956687  | 36981734  | 25048   |
| CWC27      | CWC27 spliceosome associated protein homolog                | 5  | 64064757  | 64314590  | 249834  |



|               |                                                                                      |    |           |           |         |
|---------------|--------------------------------------------------------------------------------------|----|-----------|-----------|---------|
| CWF19L1       | CWF19 like 1, cell cycle control ( <i>S. pombe</i> )                                 | 10 | 101992055 | 102027437 | 35383   |
| CWF19L2       | CWF19 like 2, cell cycle control ( <i>S. pombe</i> )                                 | 11 | 107197071 | 107328572 | 131502  |
| CWH43         | cell wall biogenesis 43 C-terminal homolog                                           | 4  | 48988264  | 49064098  | 75835   |
| <b>CX3CR1</b> | C-X3-C motif chemokine receptor 1                                                    | 3  | 39304985  | 39323226  | 18242   |
| CXCL12        | C-X-C motif chemokine ligand 12                                                      | 10 | 44793038  | 44881941  | 88904   |
| CXCL8         | C-X-C motif chemokine ligand 8                                                       | 4  | 74606223  | 74609433  | 3211    |
| CXCL9         | C-X-C motif chemokine ligand 9                                                       | 4  | 76922428  | 76928641  | 6214    |
| CXorf56       | chromosome X open reading frame 56                                                   | X  | 118672112 | 118699397 | 27286   |
| CXorf57       | chromosome X open reading frame 57                                                   | X  | 105855160 | 105922672 | 67513   |
| CYB561A3      | cytochrome b561 family member A3                                                     | 11 | 61116217  | 61129771  | 13555   |
| CYB5RL        | cytochrome b5 reductase like                                                         | 1  | 54638009  | 54665709  | 27701   |
| CYFIP2        | cytoplasmic FMR1 interacting protein 2                                               | 5  | 156693089 | 156822606 | 129518  |
| CYLC2         | cylicin 2                                                                            | 9  | 105757593 | 105780770 | 23178   |
| CYP17A1       | cytochrome P450 family 17 subfamily A member 1                                       | 10 | 104590288 | 104597290 | 7003    |
| CYP19A1       | cytochrome P450 family 19 subfamily A member 1                                       | 15 | 51500254  | 51630807  | 130554  |
| CYP1A1        | cytochrome P450 family 1 subfamily A member 1                                        | 15 | 75011883  | 75017951  | 6069    |
| CYP1A2        | cytochrome P450 family 1 subfamily A member 2                                        | 15 | 75041185  | 75048543  | 7359    |
| CYP1B1        | cytochrome P450 family 1 subfamily B member 1                                        | 2  | 38294116  | 38337044  | 42929   |
| CYP20A1       | cytochrome P450 family 20 subfamily A member 1                                       | 2  | 204103663 | 204163009 | 59347   |
| CYP2C19       | cytochrome P450 family 2 subfamily C member 19                                       | 10 | 96447911  | 96613017  | 165107  |
| <b>CYP2D6</b> | cytochrome P450 family 2 subfamily D member 6                                        | 22 | 42522501  | 42526908  | 4408    |
| CYP2E1        | cytochrome P450 family 2 subfamily E member 1                                        | 10 | 135333910 | 135374724 | 40815   |
| CYP2R1        | cytochrome P450 family 2 subfamily R member 1                                        | 11 | 14899553  | 14913798  | 14246   |
| CYP2U1        | cytochrome P450 family 2 subfamily U member 1                                        | 4  | 108852525 | 108874613 | 22089   |
| CYP3A43       | cytochrome P450 family 3 subfamily A member 43                                       | 7  | 99425636  | 99463718  | 38083   |
| CYP46A1       | cytochrome P450 family 46 subfamily A member 1                                       | 14 | 100150641 | 100193638 | 42998   |
| CYP51A1       | cytochrome P450 family 51 subfamily A member 1                                       | 7  | 91741465  | 91772266  | 30802   |
| CYP7B1        | cytochrome P450 family 7 subfamily B member 1                                        | 8  | 65500320  | 65711318  | 210999  |
| CYSTM1        | cysteine rich transmembrane module containing 1                                      | 5  | 139554227 | 139661637 | 107411  |
| CYTH1         | cytohesin 1                                                                          | 17 | 76670130  | 76778379  | 108250  |
| CYTH3         | cytohesin 3                                                                          | 7  | 6201407   | 6312275   | 110869  |
| CYTIP         | cytohesin 1 interacting protein                                                      | 2  | 158271131 | 158345473 | 74343   |
| CYR1          | cysteine and tyrosine rich 1                                                         | 21 | 27838528  | 27945603  | 107076  |
| DAAM1         | dishevelled associated activator of morphogenesis 1                                  | 14 | 59655364  | 59838123  | 182760  |
| DAAM2         | dishevelled associated activator of morphogenesis 2                                  | 6  | 39760142  | 39872648  | 112507  |
| DAB1          | DAB1, reelin adaptor protein                                                         | 1  | 57460451  | 59012406  | 1551956 |
| DAB2IP        | DAB2 interacting protein                                                             | 9  | 124329336 | 124547809 | 218474  |
| DACH1         | dachshund family transcription factor 1                                              | 13 | 72012098  | 72441330  | 429233  |
| DACH2         | dachshund family transcription factor 2                                              | X  | 85403462  | 86087607  | 684146  |
| DAG1          | dystroglycan 1                                                                       | 3  | 49506146  | 49573048  | 66903   |
| <b>DAO</b>    | D-amino acid oxidase                                                                 | 12 | 109252708 | 109294819 | 42112   |
| DAPK1         | death associated protein kinase 1                                                    | 9  | 90112143  | 90323548  | 211406  |
| DAPK2         | death associated protein kinase 2                                                    | 15 | 64199235  | 64364232  | 164998  |
| DARS          | aspartyl-tRNA synthetase                                                             | 2  | 136664247 | 136743670 | 79424   |
| DARS2         | aspartyl-tRNA synthetase 2, mitochondrial                                            | 1  | 173793641 | 173827684 | 34044   |
| DAW1          | dynein assembly factor with WD repeats 1                                             | 2  | 228735770 | 228789060 | 53291   |
| DAZ1          | deleted in azoospermia 1                                                             | Y  | 25275502  | 25345241  | 69740   |
| <b>DBH</b>    | dopamine beta-hydroxylase                                                            | 9  | 136501482 | 136524466 | 22985   |
| DCAF12        | DDB1 and CUL4 associated factor 12                                                   | 9  | 34086385  | 34127397  | 41013   |
| DCAF4         | DDB1 and CUL4 associated factor 4                                                    | 14 | 73393040  | 73426411  | 33372   |
| DCC           | DCC netrin 1 receptor                                                                | 18 | 49866542  | 51057784  | 1191243 |
| DCDC2         | doublecortin domain containing 2                                                     | 6  | 24171984  | 24358280  | 186297  |
| DCHS2         | dachsous cadherin-related 2                                                          | 4  | 155153399 | 155412930 | 259532  |
| DCN           | decorin                                                                              | 12 | 91539025  | 91576900  | 37876   |
| DCP1A         | decapping mRNA 1A                                                                    | 3  | 53317447  | 53381654  | 64208   |
| DCT           | dopachrome tautomerase                                                               | 13 | 95089558  | 95131936  | 42379   |
| <b>DCTN1</b>  | dynactin subunit 1                                                                   | 2  | 74588281  | 74619214  | 30934   |
| DCUN1D1       | defective in cullin neddylation 1 domain containing 1                                | 3  | 182655862 | 182703741 | 47880   |
| DCUN1D3       | defective in cullin neddylation 1 domain containing 3                                | 16 | 20866247  | 20911706  | 45460   |
| DCX           | doublecortin                                                                         | X  | 110537007 | 110655603 | 118597  |
| DDAH1         | dimethylarginine dimethylaminohydrolase 1                                            | 1  | 85784164  | 86043933  | 259770  |
| DDC           | dopa decarboxylase                                                                   | 7  | 50526134  | 50633154  | 107021  |
| DDHD1         | DDHD domain containing 1                                                             | 14 | 53510686  | 53620000  | 109315  |
| DDHD2         | DDHD domain containing 2                                                             | 8  | 38082736  | 38133076  | 50341   |
| DDO           | D-aspartate oxidase                                                                  | 6  | 110712974 | 110736765 | 23792   |
| DDOST         | dolichyl-diphosphooligosaccharide--protein glycosyltransferase non-catalytic subunit | 1  | 20978270  | 20988000  | 9731    |
| DDX10         | DEAD-box helicase 10                                                                 | 11 | 108535752 | 108811657 | 275906  |
| DDX21         | DExD-box helicase 21                                                                 | 10 | 70715884  | 70744829  | 28946   |
| <b>DDX31</b>  | DEAD-box helicase 31                                                                 | 9  | 135468384 | 135545788 | 77405   |
| DDX39B        | DExD-box helicase 39B                                                                | 6  | 31497996  | 31510225  | 12230   |
| DDX3X         | DEAD-box helicase 3, X-linked                                                        | X  | 41192651  | 41223725  | 31075   |
| DDX5          | DEAD-box helicase 5                                                                  | 17 | 62495734  | 62504317  | 8584    |
| DDX6          | DEAD-box helicase 6                                                                  | 11 | 118620034 | 118661858 | 41825   |
| DDX60         | DExD/H-box helicase 60                                                               | 4  | 169137444 | 169239958 | 102515  |
| DDX60L        | DEAD-box helicase 60 like                                                            | 4  | 169277886 | 169458937 | 181052  |
| <b>DEAF1</b>  | DEAF1, transcription factor                                                          | 11 | 644233    | 706715    | 62483   |

|                |                                                        |    |           |           |         |
|----------------|--------------------------------------------------------|----|-----------|-----------|---------|
| DECR1          | 2,4-dienoyl-CoA reductase 1                            | 8  | 91013633  | 91064320  | 50688   |
| DEF6           | DEF6, guanine nucleotide exchange factor               | 6  | 35265595  | 35289548  | 23954   |
| DEFB132        | defensin beta 132                                      | 20 | 238377    | 241737    | 3361    |
| DENND1A        | DENN domain containing 1A                              | 9  | 126141933 | 126692431 | 550499  |
| DENND1B        | DENN domain containing 1B                              | 1  | 197473878 | 197744826 | 270949  |
| DENND2A        | DENN domain containing 2A                              | 7  | 140218220 | 140373793 | 155574  |
| DENND2C        | DENN domain containing 2C                              | 1  | 115125469 | 115213043 | 87575   |
| DENND3         | DENN domain containing 3                               | 8  | 142127377 | 142205907 | 78531   |
| DENND4A        | DENN domain containing 4A                              | 15 | 65950384  | 66084631  | 134248  |
| DENND4C        | DENN domain containing 4C                              | 9  | 19230433  | 19374139  | 143707  |
| DENND5A        | DENN domain containing 5A                              | 11 | 9160372   | 9286937   | 126566  |
| DENND5B-AS1    | DENND5B antisense RNA 1                                | 12 | 31742857  | 31768600  | 25744   |
| DENND6A        | DENN domain containing 6A                              | 3  | 57611184  | 57678816  | 67633   |
| <b>DEPDC1B</b> | DEP domain containing 1B                               | 5  | 59892739  | 59996017  | 103279  |
| DEPDC5         | DEP domain containing 5                                | 22 | 32149944  | 32303012  | 153069  |
| <b>DERA</b>    | deoxyribose-phosphate aldolase                         | 12 | 16064106  | 16190220  | 126115  |
| DERL1          | derlin 1                                               | 8  | 124025404 | 124054663 | 29260   |
| DES            | desmin                                                 | 2  | 220283099 | 220291461 | 8363    |
| DET1           | de-etiolated homolog 1 (Arabidopsis)                   | 15 | 89054790  | 89089906  | 35117   |
| DGCR8          | DGCR8, microprocessor complex subunit                  | 22 | 20067755  | 20099400  | 31646   |
| DGKB           | diacylglycerol kinase beta                             | 7  | 14184674  | 15014402  | 829729  |
| DGKG           | diacylglycerol kinase gamma                            | 3  | 185823457 | 186080026 | 256570  |
| <b>DGKI</b>    | diacylglycerol kinase iota                             | 7  | 137065783 | 137531838 | 466056  |
| DGKQ           | diacylglycerol kinase theta                            | 4  | 952675    | 980683    | 28009   |
| DHCR24         | 24-dehydrocholesterol reductase                        | 1  | 55315306  | 55352891  | 37586   |
| DHDDS          | dehydrodolichyl diphosphate synthase subunit           | 1  | 26758773  | 26797785  | 39013   |
| DHRS11         | dehydrogenase/reductase 11                             | 17 | 34948228  | 34957235  | 9008    |
| DHRS3          | dehydrogenase/reductase 3                              | 1  | 12627939  | 12677737  | 49799   |
| DHRS7          | dehydrogenase/reductase 7                              | 14 | 60610838  | 60636574  | 25737   |
| DHX30          | DExH-box helicase 30                                   | 3  | 47844399  | 47891685  | 47287   |
| <b>DHX35</b>   | DEAH-box helicase 35                                   | 20 | 37590942  | 37668366  | 77425   |
| DHX36          | DEAH-box helicase 36                                   | 3  | 153990335 | 154042286 | 51952   |
| <b>DHX57</b>   | DExH-box helicase 57                                   | 2  | 39024871  | 39103075  | 78205   |
| DHX58          | DExH-box helicase 58                                   | 17 | 40253422  | 40264751  | 11330   |
| DIAPH1         | diaphanous related formin 1                            | 5  | 140894583 | 140998622 | 104040  |
| DIAPH2         | diaphanous related formin 2                            | X  | 95939662  | 96859996  | 920335  |
| <b>DIAPH3</b>  | diaphanous related formin 3                            | 13 | 60239717  | 60738121  | 498405  |
| DICER1         | dicer 1, ribonuclease III                              | 14 | 95552565  | 95624347  | 71783   |
| DIDO1          | death inducer-oblierator 1                             | 20 | 61509090  | 61569304  | 60215   |
| DIO2-AS1       | DIO2 antisense RNA 1                                   | 14 | 80677762  | 80921812  | 244051  |
| DIP2B          | disco interacting protein 2 homolog B                  | 12 | 50898768  | 51142450  | 243683  |
| DIP2C          | disco interacting protein 2 homolog C                  | 10 | 320130    | 735683    | 415554  |
| DIRC1          | disrupted in renal carcinoma 1                         | 2  | 189598882 | 189654831 | 55950   |
| DIRC2          | disrupted in renal carcinoma 2                         | 3  | 122513642 | 122599986 | 86345   |
| DIRC3          | disrupted in renal carcinoma 3                         | 2  | 218148742 | 218621316 | 472575  |
| DIS3L2         | DIS3 like 3'-5' exoribonuclease 2                      | 2  | 232825955 | 233209060 | 383106  |
| DISC1FP1       | DISC1 fusion partner 1 (non-protein coding)            | 11 | 89984400  | 90648220  | 663821  |
| DISP1          | dispatched RND transporter family member 1             | 1  | 222988406 | 223179337 | 190932  |
| DIXDC1         | DIX domain containing 1                                | 11 | 111797868 | 111893308 | 95441   |
| DKK1           | dickkopf WNT signaling pathway inhibitor 1             | 10 | 54074056  | 54077802  | 3747    |
| DKK2           | dickkopf WNT signaling pathway inhibitor 2             | 4  | 107842959 | 108204963 | 362005  |
| DLC1           | DLC1 Rho GTPase activating protein                     | 8  | 12940870  | 13373167  | 432298  |
| DLD            | dihydrolipoamide dehydrogenase                         | 7  | 107531415 | 107572175 | 40761   |
| DLEC1          | deleted in lung and esophageal cancer 1                | 3  | 38080696  | 38165516  | 84821   |
| DLEU1          | deleted in lymphocytic leukemia 1                      | 13 | 50656307  | 51297372  | 641066  |
| DLEU2          | deleted in lymphocytic leukemia 2 (non-protein coding) | 13 | 50601269  | 50699856  | 98588   |
| DLG1           | discs large MAGUK scaffold protein 1                   | 3  | 196769431 | 197026171 | 256741  |
| DLG2           | discs large MAGUK scaffold protein 2                   | 11 | 83166055  | 85338966  | 2172912 |
| DLGAP1         | DLG associated protein 1                               | 18 | 3496030   | 4455335   | 959306  |
| DLGAP2         | DLG associated protein 2                               | 8  | 1449532   | 1656642   | 207111  |
| DLGAP4         | DLG associated protein 4                               | 20 | 34894258  | 35157040  | 262783  |
| DLGAP5         | DLG associated protein 5                               | 14 | 55614830  | 55658396  | 43567   |
| <b>DLL3</b>    | delta like canonical Notch ligand 3                    | 19 | 39989535  | 39999121  | 9587    |
| DLST           | dihydrolipoamide S-succinyltransferase                 | 14 | 75348594  | 75370448  | 21855   |
| DMC1           | DNA meiotic recombinase 1                              | 22 | 38914954  | 38966291  | 51338   |
| DMD            | dystrophin                                             | X  | 31115794  | 33357558  | 2241765 |
| DNAH11         | dynein axonemal heavy chain 11                         | 7  | 21582833  | 21941457  | 358625  |
| DNAH12         | dynein axonemal heavy chain 12                         | 3  | 57327727  | 57530071  | 202345  |
| DNAH17         | dynein axonemal heavy chain 17                         | 17 | 76419778  | 76573476  | 153699  |
| DNAH2          | dynein axonemal heavy chain 2                          | 17 | 7620672   | 7737062   | 116391  |
| DNAH6          | dynein axonemal heavy chain 6                          | 2  | 84743579  | 85046713  | 303135  |
| DNAH7          | dynein axonemal heavy chain 7                          | 2  | 196602427 | 196933536 | 331110  |
| <b>DNAH8</b>   | dynein axonemal heavy chain 8                          | 6  | 38683117  | 38998301  | 315185  |
| DNAH9          | dynein axonemal heavy chain 9                          | 17 | 11501748  | 11873065  | 371318  |
| DNAJA2         | DnaJ heat shock protein family (Hsp40) member A2       | 16 | 46989299  | 47007699  | 18401   |
| DNAJB2         | DnaJ heat shock protein family (Hsp40) member B2       | 2  | 220143989 | 220151622 | 7634    |
| DNAJB6         | DnaJ heat shock protein family (Hsp40) member B6       | 7  | 157128075 | 157210133 | 82059   |

|                |                                                               |    |           |           |         |
|----------------|---------------------------------------------------------------|----|-----------|-----------|---------|
| DNAJC1         | DnaJ heat shock protein family (Hsp40) member C1              | 10 | 22045466  | 22292698  | 247233  |
| DNAJC12        | DnaJ heat shock protein family (Hsp40) member C12             | 10 | 69556427  | 69597924  | 41498   |
| DNAJC2         | DnaJ heat shock protein family (Hsp40) member C2              | 7  | 102952921 | 102985320 | 32400   |
| DNAJC27        | DnaJ heat shock protein family (Hsp40) member C27             | 2  | 25166505  | 25194963  | 28459   |
| DNAJC30        | DnaJ heat shock protein family (Hsp40) member C30             | 7  | 73095299  | 73097783  | 2485    |
| DNAJC6         | DnaJ heat shock protein family (Hsp40) member C6              | 1  | 65713902  | 65881552  | 167651  |
| DNAJC8         | DnaJ heat shock protein family (Hsp40) member C8              | 1  | 28525967  | 28559536  | 33570   |
| DNASE1L3       | deoxyribonuclease 1 like 3                                    | 3  | 58177984  | 58200424  | 22441   |
| DNER           | delta/notch like EGF repeat containing                        | 2  | 230222345 | 230579274 | 356930  |
| DNM1           | dynamain 1                                                    | 9  | 130965658 | 131017527 | 51870   |
| DNM2           | dynamain 2                                                    | 19 | 10828755  | 10944164  | 115410  |
| DNM3           | dynamain 3                                                    | 1  | 171810621 | 172387606 | 576986  |
| DNMBP          | dynamain binding protein                                      | 10 | 101635334 | 101769676 | 134343  |
| DNMT1          | DNA methyltransferase 1                                       | 19 | 10244021  | 10341962  | 97942   |
| <b>DOC2B</b>   | double C2 domain beta                                         | 17 | 5810      | 31427     | 25618   |
| DOCK1          | dedicator of cytokinesis 1                                    | 10 | 128593978 | 129250781 | 656804  |
| DOCK10         | dedicator of cytokinesis 10                                   | 2  | 225629807 | 225907162 | 277356  |
| DOCK11         | dedicator of cytokinesis 11                                   | X  | 117629861 | 117820126 | 190266  |
| DOCK2          | dedicator of cytokinesis 2                                    | 5  | 169064251 | 169510386 | 446136  |
| DOCK3          | dedicator of cytokinesis 3                                    | 3  | 50712672  | 51421629  | 708958  |
| DOCK4          | dedicator of cytokinesis 4                                    | 7  | 111366166 | 111846466 | 480301  |
| DOCK5          | dedicator of cytokinesis 5                                    | 8  | 25042238  | 25275598  | 233361  |
| DOCK7          | dedicator of cytokinesis 7                                    | 1  | 62920399  | 63153969  | 233571  |
| DOCK8          | dedicator of cytokinesis 8                                    | 9  | 214854    | 465259    | 250406  |
| DOCK9          | dedicator of cytokinesis 9                                    | 13 | 99445741  | 99738879  | 293139  |
| DOK5           | docking protein 5                                             | 20 | 53092136  | 53267710  | 175575  |
| DOK6           | docking protein 6                                             | 18 | 67068291  | 67516323  | 448033  |
| DPF3           | double PHD fingers 3                                          | 14 | 73086004  | 73360809  | 274806  |
| DPH5           | diphthamide biosynthesis 5                                    | 1  | 101455179 | 101491644 | 36466   |
| DPH6           | diphthamine biosynthesis 6                                    | 15 | 35509546  | 35838394  | 328849  |
| DPH6-AS1       | DPH6 antisense RNA 1 (head to head)                           | 15 | 35838396  | 36151202  | 312807  |
| DPH7           | diphthamide biosynthesis 7                                    | 9  | 140449356 | 140473387 | 24032   |
| DPM2           | dolichyl-phosphate mannosyltransferase subunit 2, regulatory  | 9  | 130697378 | 130700763 | 3386    |
| DPP10          | dipeptidyl peptidase like 10                                  | 2  | 115199876 | 116603328 | 1403453 |
| <b>DPP6</b>    | dipeptidyl peptidase like 6                                   | 7  | 153584182 | 154685995 | 1101814 |
| DPY19L1        | dpy-19 like 1                                                 | 7  | 34968488  | 35077883  | 109396  |
| DPY19L4        | dpy-19 like 4 (C. elegans)                                    | 8  | 95731931  | 95806064  | 74134   |
| DPY30          | dpy-30, histone methyltransferase complex regulatory subunit  | 2  | 32092878  | 32264881  | 172004  |
| DPYD           | dihydropyrimidine dehydrogenase                               | 1  | 97543299  | 98386605  | 843307  |
| DPYS           | dihydropyrimidinase                                           | 8  | 105342552 | 105479281 | 136730  |
| DPYSL5         | dihydropyrimidinase like 5                                    | 2  | 27070615  | 27173219  | 102605  |
| DRD1           | dopamine receptor D1                                          | 5  | 174867042 | 174871211 | 4170    |
| DRD2           | dopamine receptor D2                                          | 11 | 113280318 | 113346413 | 66096   |
| DRD3           | dopamine receptor D3                                          | 3  | 113847499 | 113918254 | 70756   |
| <b>DRD4</b>    | dopamine receptor D4                                          | 11 | 637293    | 640706    | 3414    |
| DRD5           | dopamine receptor D5                                          | 4  | 9783258   | 9785632   | 2375    |
| DROSHA         | drosha ribonuclease III                                       | 5  | 31400604  | 31532303  | 131700  |
| DSC3           | desmocollin 3                                                 | 18 | 28569974  | 28622781  | 52808   |
| DSCAM          | DS cell adhesion molecule                                     | 21 | 41382926  | 42219065  | 836140  |
| DSCAML1        | DS cell adhesion molecule like 1                              | 11 | 117298489 | 117688240 | 389752  |
| DSCC1          | DNA replication and sister chromatid cohesion 1               | 8  | 120846216 | 120868250 | 22035   |
| DSCR3          | DSCR3 arrestin fold containing                                | 21 | 38595721  | 38640262  | 44542   |
| DSCR4          | Down syndrome critical region 4                               | 21 | 39323728  | 39493454  | 169727  |
| DSE            | dermatan sulfate epimerase                                    | 6  | 116575336 | 116762424 | 187089  |
| DST            | dystonin                                                      | 6  | 56322785  | 56819426  | 496642  |
| DSTN           | destrin, actin depolymerizing factor                          | 20 | 17550508  | 17590564  | 40057   |
| DSTYK          | dual serine/threonine and tyrosine protein kinase             | 1  | 205111632 | 205180727 | 69096   |
| DTD1           | D-tyrosyl-tRNA deacylase 1                                    | 20 | 18568537  | 18744561  | 176025  |
| DTNA           | dystrobrevin alpha                                            | 18 | 32073254  | 32471808  | 398555  |
| DTNBP1         | dystrobrevin binding protein 1                                | 6  | 15523032  | 15663289  | 140258  |
| DUSP10         | dual specificity phosphatase 10                               | 1  | 221874766 | 221915518 | 40753   |
| DUSP18         | dual specificity phosphatase 18                               | 22 | 31048038  | 31063877  | 15840   |
| DUSP22         | dual specificity phosphatase 22                               | 6  | 291630    | 351355    | 59726   |
| DYM            | dymeclin                                                      | 18 | 46570039  | 46987717  | 417679  |
| <b>DYNC1H1</b> | dynein cytoplasmic 1 heavy chain 1                            | 14 | 102430865 | 102517129 | 86265   |
| DYNC1I1        | dynein cytoplasmic 1 intermediate chain 1                     | 7  | 95401866  | 95739634  | 337769  |
| DYNC2H1        | dynein cytoplasmic 2 heavy chain 1                            | 11 | 102980160 | 103350591 | 370432  |
| DYNC2LI1       | dynein cytoplasmic 2 light intermediate chain 1               | 2  | 44001178  | 44037149  | 35972   |
| DYRK1A         | dual specificity tyrosine phosphorylation regulated kinase 1A | 21 | 38738092  | 38889753  | 151662  |
| DYSF           | dysferlin                                                     | 2  | 71680852  | 71913898  | 233047  |
| DZANK1         | double zinc ribbon and ankyrin repeat domains 1               | 20 | 18364011  | 18447925  | 83915   |
| DZIP1          | DAZ interacting zinc finger protein 1                         | 13 | 96230457  | 96296957  | 66501   |
| E2F2           | E2F transcription factor 2                                    | 1  | 23832922  | 23857712  | 24791   |
| EBF1           | early B-cell factor 1                                         | 5  | 158122928 | 158526769 | 403842  |
| EBF2           | early B-cell factor 2                                         | 8  | 25699246  | 25902913  | 203668  |
| EBF3           | early B-cell factor 3                                         | 10 | 131633547 | 131762105 | 128559  |
| EBF4           | early B-cell factor 4                                         | 20 | 2673524   | 2740753   | 67230   |

|               |                                                                                |    |           |           |        |
|---------------|--------------------------------------------------------------------------------|----|-----------|-----------|--------|
| EBNA1BP2      | EBNA1 binding protein 2                                                        | 1  | 43629846  | 43736607  | 106762 |
| ECE1          | endothelin converting enzyme 1                                                 | 1  | 21543740  | 21671997  | 128258 |
| ECT2          | epithelial cell transforming 2                                                 | 3  | 172468472 | 172539264 | 70793  |
| EDA           | ectodysplasin A                                                                | X  | 68835911  | 69259319  | 423409 |
| <b>EDA2R</b>  | ectodysplasin A2 receptor                                                      | X  | 65815479  | 65859108  | 43630  |
| EDF1          | endothelial differentiation related factor 1                                   | 9  | 139756571 | 139760738 | 4168   |
| EDIL3         | EGF like repeats and discoidin domains 3                                       | 5  | 83236373  | 83680611  | 444239 |
| EDN1          | endothelin 1                                                                   | 6  | 12290596  | 12297427  | 6832   |
| EDNRB-AS1     | EDNRB antisense RNA 1                                                          | 13 | 78402357  | 78408085  | 5729   |
| EED           | embryonic ectoderm development                                                 | 11 | 85955586  | 85989855  | 34270  |
| <b>EEF1D</b>  | eukaryotic translation elongation factor 1 delta                               | 8  | 144661867 | 144681711 | 19845  |
| EEFSEC        | eukaryotic elongation factor, selenocysteine-tRNA specific                     | 3  | 127872297 | 128127485 | 255189 |
| EFCAB1        | EF-hand calcium binding domain 1                                               | 8  | 49623348  | 49647870  | 24523  |
| EFCAB12       | EF-hand calcium binding domain 12                                              | 3  | 129120164 | 129147494 | 27331  |
| EFCAB13       | EF-hand calcium binding domain 13                                              | 17 | 45400656  | 45518678  | 118023 |
| EFCAB2        | EF-hand calcium binding domain 2                                               | 1  | 245133007 | 245290466 | 157460 |
| EFCAB6        | EF-hand calcium binding domain 6                                               | 22 | 43924624  | 44208217  | 283594 |
| EFCAB7        | EF-hand calcium binding domain 7                                               | 1  | 63989043  | 64038364  | 49322  |
| <b>EFEMP1</b> | EGF containing fibulin like extracellular matrix protein 1                     | 2  | 56093102  | 56151274  | 58173  |
| EFHC1         | EF-hand domain containing 1                                                    | 6  | 52285106  | 52387892  | 102787 |
| EFNA5         | ephrin A5                                                                      | 5  | 106712590 | 107006596 | 294007 |
| EFNB1         | ephrin B1                                                                      | X  | 68048840  | 68061990  | 13151  |
| EFTUD2        | elongation factor Tu GTP binding domain containing 2                           | 17 | 42927311  | 42977030  | 49720  |
| EGFEM1P       | EGF like and EMI domain containing 1, pseudogene                               | 3  | 167967310 | 168548387 | 581078 |
| EGFLAM        | EGF like, fibronectin type III and laminin G domains                           | 5  | 38258511  | 38465123  | 206613 |
| EGFR          | epidermal growth factor receptor                                               | 7  | 55086714  | 55324313  | 237600 |
| EGR2          | early growth response 2                                                        | 10 | 64571756  | 64679660  | 107905 |
| EHBP1         | EH domain binding protein 1                                                    | 2  | 62900986  | 63273622  | 372637 |
| EHMT2         | euchromatic histone lysine methyltransferase 2                                 | 6  | 31847536  | 31865464  | 17929  |
| EIF2AK2       | eukaryotic translation initiation factor 2 alpha kinase 2                      | 2  | 37326353  | 37384208  | 57856  |
| EIF2B1        | eukaryotic translation initiation factor 2B subunit alpha                      | 12 | 124104953 | 124118313 | 13361  |
| EIF2B2        | eukaryotic translation initiation factor 2B subunit beta                       | 14 | 75469614  | 75476292  | 6679   |
| EIF2B3        | eukaryotic translation initiation factor 2B subunit gamma                      | 1  | 45316450  | 45452282  | 135833 |
| EIF2B4        | eukaryotic translation initiation factor 2B subunit delta                      | 2  | 27587219  | 27593353  | 6135   |
| EIF2B5        | eukaryotic translation initiation factor 2B subunit epsilon                    | 3  | 183852826 | 184402546 | 549721 |
| EIF3A         | eukaryotic translation initiation factor 3 subunit A                           | 10 | 120794356 | 120840316 | 45961  |
| EIF3D         | eukaryotic translation initiation factor 3 subunit D                           | 22 | 36906897  | 36925483  | 18587  |
| EIF3E         | eukaryotic translation initiation factor 3 subunit E                           | 8  | 109213445 | 109447562 | 234118 |
| EIF3J         | eukaryotic translation initiation factor 3 subunit J                           | 15 | 44829255  | 44855227  | 25973  |
| EIF4B         | eukaryotic translation initiation factor 4B                                    | 12 | 53399942  | 53435993  | 36052  |
| EIF4E2        | eukaryotic translation initiation factor 4E family member 2                    | 2  | 233414762 | 233448354 | 33593  |
| EIF4ENIF1     | eukaryotic translation initiation factor 4E nuclear import factor 1            | 22 | 31832963  | 31892094  | 59132  |
| EIF4G1        | eukaryotic translation initiation factor 4 gamma 1                             | 3  | 184032283 | 184053146 | 20864  |
| EIF4G2        | eukaryotic translation initiation factor 4 gamma 2                             | 11 | 10818597  | 10830657  | 12061  |
| EIF4G3        | eukaryotic translation initiation factor 4 gamma 3                             | 1  | 21132963  | 21503377  | 370415 |
| EIF4H         | eukaryotic translation initiation factor 4H                                    | 7  | 73588575  | 73611431  | 22857  |
| EIF5B         | eukaryotic translation initiation factor 5B                                    | 2  | 99953816  | 100017789 | 63974  |
| ELAVL1        | ELAV like RNA binding protein 1                                                | 19 | 8023463   | 8070543   | 47081  |
| ELAVL3        | ELAV like RNA binding protein 3                                                | 19 | 11562141  | 11591861  | 29721  |
| ELAVL4        | ELAV like RNA binding protein 4                                                | 1  | 50513686  | 50669458  | 155773 |
| ELFN2         | extracellular leucine rich repeat and fibronectin type III domain containing 2 | 22 | 37764000  | 37823505  | 59506  |
| ELK1          | ELK1, ETS transcription factor                                                 | X  | 47494920  | 47510003  | 15084  |
| ELK3          | ELK3, ETS transcription factor                                                 | 12 | 96588160  | 96663613  | 75454  |
| ELK4          | ELK4, ETS transcription factor                                                 | 1  | 205577071 | 205601090 | 24020  |
| ELL           | elongation factor for RNA polymerase II                                        | 19 | 18553473  | 18632937  | 79465  |
| ELMO1         | engulfment and cell motility 1                                                 | 7  | 36893961  | 37488852  | 594892 |
| ELOVL5        | ELOVL fatty acid elongase 5                                                    | 6  | 53132196  | 53213947  | 81752  |
| ELOVL6        | ELOVL fatty acid elongase 6                                                    | 4  | 110967002 | 111120355 | 153354 |
| <b>ELP3</b>   | elongator acetyltransferase complex subunit 3                                  | 8  | 27947190  | 28048673  | 101484 |
| ELP4          | elongator acetyltransferase complex subunit 4                                  | 11 | 31531297  | 31805546  | 274250 |
| EMC3          | ER membrane protein complex subunit 3                                          | 3  | 10004221  | 10052800  | 48580  |
| EML1          | echinoderm microtubule associated protein like 1                               | 14 | 100204030 | 100408397 | 204368 |
| EML4          | echinoderm microtubule associated protein like 4                               | 2  | 42396490  | 42559688  | 163199 |
| EML5          | echinoderm microtubule associated protein like 5                               | 14 | 89078775  | 89259096  | 180322 |
| EML6          | echinoderm microtubule associated protein like 6                               | 2  | 54950636  | 55199157  | 248522 |
| EN1           | engrailed homeobox 1                                                           | 2  | 119599747 | 119605254 | 5508   |
| EN2           | engrailed homeobox 2                                                           | 7  | 155250824 | 155257526 | 6703   |
| ENAH          | enabled homolog (Drosophila)                                                   | 1  | 225674537 | 225840844 | 166308 |
| ENO4          | enolase family member 4                                                        | 10 | 118609023 | 118671299 | 62277  |
| ENOX1         | ecto-NOX disulfide-thiol exchanger 1                                           | 13 | 43787654  | 44361044  | 573391 |
| ENOX2         | ecto-NOX disulfide-thiol exchanger 2                                           | X  | 129757350 | 130037208 | 279859 |
| ENPEP         | glutamyl aminopeptidase                                                        | 4  | 111286889 | 111486441 | 199553 |
| <b>ENPP1</b>  | ectonucleotide pyrophosphatase/phosphodiesterase 1                             | 6  | 132129156 | 132216295 | 87140  |
| ENPP6         | ectonucleotide pyrophosphatase/phosphodiesterase 6                             | 4  | 185009859 | 185142383 | 132525 |
| ENTHD1        | ENTH domain containing 1                                                       | 22 | 40139049  | 40289868  | 150820 |
| ENTPD1-AS1    | ENTPD1 antisense RNA 1                                                         | 10 | 97512963  | 97849995  | 337033 |

|              |                                                                |    |           |           |         |
|--------------|----------------------------------------------------------------|----|-----------|-----------|---------|
| ENTPD4       | ectonucleoside triphosphate diphosphohydrolase 4               | 8  | 23243296  | 23315208  | 71913   |
| ENTPD7       | ectonucleoside triphosphate diphosphohydrolase 7               | 10 | 101419263 | 101465997 | 46735   |
| ENY2         | ENY2, transcription and export complex 2 subunit               | 8  | 110346553 | 110358182 | 11630   |
| EOMES        | eomesodermin                                                   | 3  | 27757440  | 27764206  | 6767    |
| EP400NL      | EP400 N-terminal like                                          | 12 | 132568828 | 132613029 | 44202   |
| EPB41L1      | erythrocyte membrane protein band 4.1 like 1                   | 20 | 34679426  | 34820721  | 141296  |
| EPB41L2      | erythrocyte membrane protein band 4.1 like 2                   | 6  | 131160487 | 131384462 | 223976  |
| EPB41L3      | erythrocyte membrane protein band 4.1 like 3                   | 18 | 5392383   | 5630699   | 238317  |
| EPB41L4A     | erythrocyte membrane protein band 4.1 like 4A                  | 5  | 111478138 | 111755013 | 276876  |
| EPB41L4B     | erythrocyte membrane protein band 4.1 like 4B                  | 9  | 111934255 | 112083244 | 148990  |
| EPB41L5      | erythrocyte membrane protein band 4.1 like 5                   | 2  | 120770581 | 120936695 | 166115  |
| EPC1         | enhancer of polycomb homolog 1                                 | 10 | 32556679  | 32667726  | 111048  |
| EPC2         | enhancer of polycomb homolog 2                                 | 2  | 149402009 | 149545130 | 143122  |
| <b>EPHA3</b> | EPH receptor A3                                                | 3  | 89156674  | 89531284  | 374611  |
| <b>EPHA4</b> | EPH receptor A4                                                | 2  | 222282747 | 222438922 | 156176  |
| EPHA5        | EPH receptor A5                                                | 4  | 66185281  | 66536213  | 350933  |
| EPHA6        | EPH receptor A6                                                | 3  | 96533425  | 97471304  | 937880  |
| EPHA7        | EPH receptor A7                                                | 6  | 93949738  | 94129265  | 179528  |
| EPHB1        | EPH receptor B1                                                | 3  | 134316643 | 134979309 | 662667  |
| EPHB2        | EPH receptor B2                                                | 1  | 23037332  | 23241818  | 204487  |
| EPHX1        | epoxide hydrolase 1                                            | 1  | 225997794 | 226033260 | 35467   |
| EPHX2        | epoxide hydrolase 2                                            | 8  | 27348296  | 27403081  | 54786   |
| EPM2A        | EPM2A, laforin glucan phosphatase                              | 6  | 145822719 | 146057160 | 234442  |
| EPN2         | epsin 2                                                        | 17 | 19118928  | 19240028  | 121101  |
| EPS15        | epidermal growth factor receptor pathway substrate 15          | 1  | 51819935  | 51985000  | 165066  |
| <b>EPS8</b>  | epidermal growth factor receptor pathway substrate 8           | 12 | 15773092  | 16035263  | 262172  |
| EPST11       | epithelial stromal interaction 1                               | 13 | 43460524  | 43566407  | 105884  |
| ERAP1        | endoplasmic reticulum aminopeptidase 1                         | 5  | 96096521  | 96143803  | 47283   |
| ERBB2        | erb-b2 receptor tyrosine kinase 2                              | 17 | 37844167  | 37886679  | 42513   |
| <b>ERBB4</b> | erb-b2 receptor tyrosine kinase 4                              | 2  | 212240446 | 213403565 | 1163120 |
| ERC1         | ELKS/RAB6-interacting/CAST family member 1                     | 12 | 1099675   | 1605099   | 505425  |
| ERC2         | ELKS/RAB6-interacting/CAST family member 2                     | 3  | 55542336  | 56502391  | 960056  |
| ERCC4        | ERCC excision repair 4, endonuclease catalytic subunit         | 16 | 14014014  | 14046202  | 32189   |
| ERCC6        | ERCC excision repair 6, chromatin remodeling factor            | 10 | 50663414  | 50747584  | 84171   |
| ERCC6L2      | ERCC excision repair 6 like 2                                  | 9  | 98637983  | 98776842  | 138860  |
| <b>ERCC8</b> | ERCC excision repair 8, CSA ubiquitin ligase complex subunit   | 5  | 60169658  | 60240900  | 71243   |
| ERG          | ERG, ETS transcription factor                                  | 21 | 39751949  | 40033704  | 281756  |
| ERI3         | ERI1 exoribonuclease family member 3                           | 1  | 44686742  | 44820932  | 134191  |
| ERLIN1       | ER lipid raft associated 1                                     | 10 | 101909851 | 101948091 | 38241   |
| ERLIN2       | ER lipid raft associated 2                                     | 8  | 37594117  | 37616619  | 22503   |
| ESR1         | estrogen receptor 1                                            | 6  | 151977826 | 152450754 | 472929  |
| ESRRG        | estrogen related receptor gamma                                | 1  | 216676588 | 217311097 | 634510  |
| ETF1         | eukaryotic translation termination factor 1                    | 5  | 137841784 | 137878989 | 37206   |
| ETNK1        | ethanolamine kinase 1                                          | 12 | 22778009  | 22843599  | 65591   |
| ETS2         | ETS proto-oncogene 2, transcription factor                     | 21 | 40177231  | 40196879  | 19649   |
| ETV1         | ETS variant 1                                                  | 7  | 13930853  | 14031050  | 100198  |
| ETV4         | ETS variant 4                                                  | 17 | 41605212  | 41656988  | 51777   |
| ETV6         | ETS variant 6                                                  | 12 | 11802788  | 12048336  | 245549  |
| EVL          | Enah/Vasp-like                                                 | 14 | 100437786 | 100610573 | 172788  |
| <b>EWSR1</b> | EWS RNA binding protein 1                                      | 22 | 29663998  | 29696515  | 32518   |
| EXD2         | exonuclease 3'-5' domain containing 2                          | 14 | 69658228  | 69709075  | 50848   |
| <b>EXO1</b>  | exonuclease 1                                                  | 1  | 242011269 | 242058450 | 47182   |
| EXOC1        | exocyst complex component 1                                    | 4  | 56719782  | 56771200  | 51419   |
| EXOC2        | exocyst complex component 2                                    | 6  | 485133    | 693117    | 207985  |
| EXOC3L2      | exocyst complex component 3 like 2                             | 19 | 45715879  | 45737469  | 21591   |
| <b>EXOC4</b> | exocyst complex component 4                                    | 7  | 132937829 | 133751342 | 813514  |
| EXOC6B       | exocyst complex component 6B                                   | 2  | 72403113  | 73053170  | 650058  |
| EXOSC3       | exosome component 3                                            | 9  | 37766975  | 37801434  | 34460   |
| EXPH5        | exophilin 5                                                    | 11 | 108376158 | 108464465 | 88308   |
| EXT1         | exostosin glycosyltransferase 1                                | 8  | 118806729 | 119124092 | 317364  |
| EXT2         | exostosin glycosyltransferase 2                                | 11 | 44117099  | 44266979  | 149881  |
| EYA1         | EYA transcriptional coactivator and phosphatase 1              | 8  | 72109668  | 72274467  | 164800  |
| EYA2         | EYA transcriptional coactivator and phosphatase 2              | 20 | 45523263  | 45817492  | 294230  |
| EYS          | eyes shut homolog (Drosophila)                                 | 6  | 64429876  | 66417118  | 1987243 |
| EZH2         | enhancer of zeste 2 polycomb repressive complex 2 subunit      | 7  | 148504475 | 148581413 | 76939   |
| EZR          | eZRin                                                          | 6  | 159186773 | 159240444 | 53672   |
| F13A1        | coagulation factor XIII A chain                                | 6  | 6144318   | 6321246   | 176929  |
| F2           | coagulation factor II, thrombin                                | 11 | 46740730  | 46761056  | 20327   |
| F5           | coagulation factor V                                           | 1  | 169483404 | 169555826 | 72423   |
| F8           | coagulation factor VIII                                        | X  | 154064063 | 154255215 | 191153  |
| FA2H         | fatty acid 2-hydroxylase                                       | 16 | 74746853  | 74808729  | 61877   |
| FAAH2        | fatty acid amide hydrolase 2                                   | X  | 57313139  | 57515629  | 202491  |
| FABP1        | fatty acid binding protein 1                                   | 2  | 88422510  | 88427635  | 5126    |
| FAF1         | Fas associated factor 1                                        | 1  | 50905150  | 51425935  | 520786  |
| FAHD2CP      | fumarylacetoacetate hydrolase domain containing 2C, pseudogene | 2  | 96676299  | 96689128  | 12830   |
| FAM102B      | family with sequence similarity 102 member B                   | 1  | 109102711 | 109187522 | 84812   |
| FAM104A      | family with sequence similarity 104 member A                   | 17 | 71203492  | 71232892  | 29401   |

|                 |                                                                        |    |           |           |        |
|-----------------|------------------------------------------------------------------------|----|-----------|-----------|--------|
| FAM107B         | family with sequence similarity 107 member B                           | 10 | 14560556  | 14816896  | 256341 |
| FAM110B         | family with sequence similarity 110 member B                           | 8  | 58907068  | 59116838  | 209771 |
| <b>FAM114A1</b> | family with sequence similarity 114 member A1                          | 4  | 38869298  | 38947360  | 78063  |
| FAM114A2        | family with sequence similarity 114 member A2                          | 5  | 153369688 | 153418496 | 48809  |
| FAM118B         | family with sequence similarity 118 member B                           | 11 | 126081309 | 126132881 | 51573  |
| FAM120A         | family with sequence similarity 120A                                   | 9  | 96214004  | 96328397  | 114394 |
| FAM120B         | family with sequence similarity 120B                                   | 6  | 170599791 | 170716153 | 116363 |
| FAM120C         | family with sequence similarity 120C                                   | X  | 54094757  | 54209714  | 114958 |
| FAM126A         | family with sequence similarity 126 member A                           | 7  | 22980878  | 23053749  | 72872  |
| FAM126B         | family with sequence similarity 126 member B                           | 2  | 201838441 | 201936394 | 97954  |
| FAM129A         | family with sequence similarity 129 member A                           | 1  | 184759858 | 184943682 | 183825 |
| FAM131A         | family with sequence similarity 131 member A                           | 3  | 184053714 | 184064063 | 10350  |
| FAM135A         | family with sequence similarity 135 member A                           | 6  | 71122644  | 71270877  | 148234 |
| <b>FAM135B</b>  | family with sequence similarity 135 member B                           | 8  | 139142266 | 139509065 | 366800 |
| FAM13A          | family with sequence similarity 13 member A                            | 4  | 89647106  | 90032549  | 385444 |
| FAM13C          | family with sequence similarity 13 member C                            | 10 | 61005890  | 61122939  | 117050 |
| FAM155A         | family with sequence similarity 155 member A                           | 13 | 107820883 | 108519083 | 698201 |
| FAM157C         | family with sequence similarity 157 member C (non-protein coding)      | 16 | 90168679  | 90244752  | 76074  |
| FAM159A         | family with sequence similarity 159 member A                           | 1  | 53099016  | 53135355  | 36340  |
| FAM160A1        | family with sequence similarity 160 member A1                          | 4  | 152330368 | 152584784 | 254417 |
| FAM160B1        | family with sequence similarity 160 member B1                          | 10 | 116581503 | 116659591 | 78089  |
| FAM161B         | family with sequence similarity 161 member B                           | 14 | 74398204  | 74417117  | 18914  |
| FAM168A         | family with sequence similarity 168 member A                           | 11 | 73111532  | 73309234  | 197703 |
| FAM172A         | family with sequence similarity 172 member A                           | 5  | 92953775  | 93447404  | 493630 |
| FAM172BP        | family with sequence similarity 172 member B, pseudogene               | 3  | 101237711 | 101242731 | 5021   |
| FAM175A         | family with sequence similarity 175 member A                           | 4  | 84382092  | 84444501  | 62410  |
| FAM189A1        | family with sequence similarity 189 member A1                          | 15 | 29412457  | 29862927  | 450471 |
| FAM192A         | family with sequence similarity 192 member A                           | 16 | 57186378  | 57220028  | 33651  |
| FAM193A         | family with sequence similarity 193 member A                           | 4  | 2626988   | 2734292   | 107305 |
| FAM193B         | family with sequence similarity 193 member B                           | 5  | 176946789 | 176981542 | 34754  |
| FAM199X         | family with sequence similarity 199, X-linked                          | X  | 103411301 | 103440583 | 29283  |
| FAM19A1         | family with sequence similarity 19 member A1, C-C motif chemokine like | 3  | 68053359  | 68594776  | 541418 |
| FAM19A2         | family with sequence similarity 19 member A2, C-C motif chemokine like | 12 | 62102040  | 62672931  | 570892 |
| FAM19A5         | family with sequence similarity 19 member A5, C-C motif chemokine like | 22 | 48885272  | 49246724  | 361453 |
| FAM204A         | family with sequence similarity 204 member A                           | 10 | 120065401 | 120101840 | 36440  |
| FAM208A         | family with sequence similarity 208 member A                           | 3  | 56654161  | 56717265  | 63105  |
| FAM212B         | family with sequence similarity 212 member B                           | 1  | 112223252 | 112298446 | 75195  |
| FAM214A         | family with sequence similarity 214 member A                           | 15 | 52873514  | 53002014  | 128501 |
| FAM222B         | family with sequence similarity 222 member B                           | 17 | 27082996  | 27182250  | 99255  |
| FAM227B         | family with sequence similarity 227 member B                           | 15 | 49619159  | 49913128  | 293970 |
| FAM49A          | family with sequence similarity 49 member A                            | 2  | 16730727  | 16847599  | 116873 |
| <b>FAM49B</b>   | family with sequence similarity 49 member B                            | 8  | 130851839 | 131029375 | 177537 |
| FAM50A          | family with sequence similarity 50 member A                            | X  | 153672473 | 153679002 | 6530   |
| FAM53B          | family with sequence similarity 53 member B                            | 10 | 126307861 | 126432838 | 124978 |
| FAM60A          | family with sequence similarity 60 member A                            | 12 | 31433518  | 31479992  | 46475  |
| FAM66E          | family with sequence similarity 66 member E                            | 8  | 7812536   | 7866277   | 53742  |
| FAM69A          | family with sequence similarity 69 member A                            | 1  | 93307724  | 93427057  | 119334 |
| FAM71D          | family with sequence similarity 71 member D                            | 14 | 67656110  | 67695267  | 39158  |
| FAM71F2         | family with sequence similarity 71 member F2                           | 7  | 128312342 | 128326929 | 14588  |
| FAM91A1         | family with sequence similarity 91 member A1                           | 8  | 124780696 | 124827692 | 46997  |
| FANCI           | Fanconi anemia complementation group I                                 | 15 | 89787180  | 89860492  | 73313  |
| FANCL           | Fanconi anemia complementation group L                                 | 2  | 58386378  | 58468507  | 82130  |
| FANCM           | Fanconi anemia complementation group M                                 | 14 | 45605143  | 45670093  | 64951  |
| FANK1           | fibronectin type III and ankyrin repeat domains 1                      | 10 | 127585108 | 127698161 | 113054 |
| FAP             | fibroblast activation protein alpha                                    | 2  | 163027194 | 163101661 | 74468  |
| FAR2            | fatty acyl-CoA reductase 2                                             | 12 | 29302036  | 29493913  | 191878 |
| FARP1           | FERM, ARH/RhoGEF and pleckstrin domain protein 1                       | 13 | 98794816  | 99102027  | 307212 |
| FARP2           | FERM, ARH/RhoGEF and pleckstrin domain protein 2                       | 2  | 242295658 | 242434256 | 138599 |
| FARS2           | phenylalanyl-tRNA synthetase 2, mitochondrial                          | 6  | 5261277   | 5771813   | 510537 |
| FARSB           | phenylalanyl-tRNA synthetase beta subunit                              | 2  | 223435255 | 223521056 | 85802  |
| FAS             | Fas cell surface death receptor                                        | 10 | 90750414  | 90775542  | 25129  |
| FAT1            | FAT atypical cadherin 1                                                | 4  | 187508937 | 187647876 | 138940 |
| FAT3            | FAT atypical cadherin 3                                                | 11 | 92085262  | 92629618  | 544357 |
| FAT4            | FAT atypical cadherin 4                                                | 4  | 126237554 | 126414087 | 176534 |
| FBLN5           | fibulin 5                                                              | 14 | 92335756  | 92414331  | 78576  |
| FBLN7           | fibulin 7                                                              | 2  | 112895962 | 112945791 | 49830  |
| FBN1            | fibrillin 1                                                            | 15 | 48700503  | 48938046  | 237544 |
| FBN2            | fibrillin 2                                                            | 5  | 127593601 | 127994878 | 401278 |
| FBRSL1          | fibrosin like 1                                                        | 12 | 133066137 | 133161774 | 95638  |
| FBXL12          | F-box and leucine rich repeat protein 12                               | 19 | 9920943   | 9938492   | 17550  |
| FBXL13          | F-box and leucine rich repeat protein 13                               | 7  | 102453308 | 102715286 | 261979 |
| FBXL17          | F-box and leucine rich repeat protein 17                               | 5  | 107194736 | 107717799 | 523064 |
| FBXL18          | F-box and leucine rich repeat protein 18                               | 7  | 5470966   | 5553429   | 82464  |
| FBXL20          | F-box and leucine rich repeat protein 20                               | 17 | 37415384  | 37558776  | 143393 |

|               |                                                       |    |           |           |         |
|---------------|-------------------------------------------------------|----|-----------|-----------|---------|
| FBXL3         | F-box and leucine rich repeat protein 3               | 13 | 77566740  | 77601330  | 34591   |
| FBXL7         | F-box and leucine rich repeat protein 7               | 5  | 15500305  | 15939900  | 439596  |
| FBXO15        | F-box protein 15                                      | 18 | 71740588  | 71815100  | 74513   |
| FBXO3         | F-box protein 3                                       | 11 | 33762485  | 33796089  | 33605   |
| FBXO31        | F-box protein 31                                      | 16 | 87360593  | 87425748  | 65156   |
| FBXO32        | F-box protein 32                                      | 8  | 124510129 | 124553446 | 43318   |
| FBXO38        | F-box protein 38                                      | 5  | 147763498 | 147822399 | 58902   |
| <b>FBXO42</b> | F-box protein 42                                      | 1  | 16573334  | 16678949  | 105616  |
| FBXO46        | F-box protein 46                                      | 19 | 46213887  | 46234162  | 20276   |
| FBXO5         | F-box protein 5                                       | 6  | 153291664 | 153304714 | 13051   |
| FBXO7         | F-box protein 7                                       | 22 | 32870663  | 32894818  | 24156   |
| FBXW11        | F-box and WD repeat domain containing 11              | 5  | 171288553 | 171433877 | 145325  |
| FBXW4         | F-box and WD repeat domain containing 4               | 10 | 103370423 | 103455052 | 84630   |
| FBXW7         | F-box and WD repeat domain containing 7               | 4  | 153242410 | 153457253 | 214844  |
| FCER2         | Fc fragment of IgE receptor II                        | 19 | 7753644   | 7767032   | 13389   |
| FCHO2         | FCH domain only 2                                     | 5  | 72251808  | 72386349  | 134542  |
| FCHSD2        | FCH and double SH3 domains 2                          | 11 | 72547790  | 72853306  | 305517  |
| FCRL3         | Fc receptor like 3                                    | 1  | 157644111 | 157670647 | 26537   |
| FDP5          | farnesyl diphosphate synthase                         | 1  | 155278539 | 155290457 | 11919   |
| FEM1C         | fem-1 homolog C                                       | 5  | 114856608 | 114880591 | 23984   |
| FER           | FER tyrosine kinase                                   | 5  | 108083523 | 108532542 | 449020  |
| FER1L6-AS2    | FER1L6 antisense RNA 2                                | 8  | 125058314 | 125183763 | 125450  |
| FERMT3        | fermitin family member 3                              | 11 | 63974150  | 63991354  | 17205   |
| <b>FEZF2</b>  | FEZ family zinc finger 2                              | 3  | 62355356  | 62359999  | 4644    |
| FGD3          | FYVE, RhoGEF and PH domain containing 3               | 9  | 95709733  | 95798518  | 88786   |
| FGD4          | FYVE, RhoGEF and PH domain containing 4               | 12 | 32552463  | 32798984  | 246522  |
| FGD6          | FYVE, RhoGEF and PH domain containing 6               | 12 | 95470525  | 95611258  | 140734  |
| FGF1          | fibroblast growth factor 1                            | 5  | 141971743 | 142077617 | 105875  |
| FGF12         | fibroblast growth factor 12                           | 3  | 191857184 | 192485553 | 628370  |
| FGF13         | fibroblast growth factor 13                           | X  | 137713735 | 138304939 | 591205  |
| FGF14         | fibroblast growth factor 14                           | 13 | 102372134 | 103054124 | 681991  |
| FGF20         | fibroblast growth factor 20                           | 8  | 16849678  | 16859690  | 10013   |
| FGF3          | fibroblast growth factor 3                            | 11 | 69624992  | 69633792  | 8801    |
| FGFBP2        | fibroblast growth factor binding protein 2            | 4  | 15961866  | 15970932  | 9067    |
| FGFR1         | fibroblast growth factor receptor 1                   | 8  | 38268656  | 38326352  | 57697   |
| FGFR10P2      | FGFR1 oncogene partner 2                              | 12 | 27091316  | 27119583  | 28268   |
| FGFR2         | fibroblast growth factor receptor 2                   | 10 | 123237848 | 123357972 | 120125  |
| FGFR3         | fibroblast growth factor receptor 3                   | 4  | 1795034   | 1810599   | 15566   |
| <b>FGGY</b>   | FGGY carbohydrate kinase domain containing            | 1  | 59762310  | 60233347  | 471038  |
| FHAD1         | forkhead associated phosphopeptide binding domain 1   | 1  | 15573768  | 15726779  | 153012  |
| FHDC1         | FH2 domain containing 1                               | 4  | 153857504 | 153900848 | 43345   |
| FHIT          | fragile histidine triad                               | 3  | 59735036  | 61237133  | 1502098 |
| FHOD3         | formin homology 2 domain containing 3                 | 18 | 33877677  | 34360018  | 482342  |
| <b>FIG4</b>   | FIG4 phosphoinositide 5-phosphatase                   | 6  | 110012499 | 110146631 | 134133  |
| FIGNL1        | figetin like 1                                        | 7  | 50511831  | 50518088  | 6258    |
| FILIP1        | filamin A interacting protein 1                       | 6  | 76001575  | 76203454  | 201880  |
| FKBP14        | FK506 binding protein 14                              | 7  | 30050203  | 30066300  | 16098   |
| FKBP5         | FK506 binding protein 5                               | 6  | 35541362  | 35696360  | 154999  |
| FKRP          | fukutin related protein                               | 19 | 47249303  | 47280245  | 30943   |
| FKTN          | fukutin                                               | 9  | 108320411 | 108403399 | 82989   |
| FLG           | filaggrin                                             | 1  | 152274651 | 152297679 | 23029   |
| FLI1          | Fli-1 proto-oncogene, ETS transcription factor        | 11 | 128556430 | 128683162 | 126733  |
| FLNA          | filamin A                                             | X  | 153576892 | 153603006 | 26115   |
| FLOT1         | flotillin 1                                           | 6  | 30695486  | 30710510  | 15025   |
| FLT1          | fms related tyrosine kinase 1                         | 13 | 28874489  | 29069265  | 194777  |
| FLT3          | fms related tyrosine kinase 3                         | 13 | 28577411  | 28674729  | 97319   |
| FMN1          | formin 1                                              | 15 | 33057747  | 33486897  | 429151  |
| <b>FMN2</b>   | formin 2                                              | 1  | 240177648 | 240638489 | 460842  |
| <b>FMNL2</b>  | formin like 2                                         | 2  | 153191751 | 153506348 | 314598  |
| FMO6P         | flavin containing monooxygenase 6 pseudogene          | 1  | 171106879 | 171130707 | 23829   |
| FMOD          | fibromodulin                                          | 1  | 203309756 | 203320617 | 10862   |
| FMR1          | fragile X mental retardation 1                        | X  | 146993469 | 147032645 | 39177   |
| FMR1-AS1      | FMR1 antisense RNA 1                                  | X  | 146990949 | 146993335 | 2387    |
| FN1           | fibronectin 1                                         | 2  | 216225163 | 216300895 | 75733   |
| FN3KRP        | fructosamine 3 kinase related protein                 | 17 | 80674559  | 80688204  | 13646   |
| FNBP1         | formin binding protein 1                              | 9  | 132649466 | 132805473 | 156008  |
| FNDC3A        | fibronectin type III domain containing 3A             | 13 | 49550048  | 49783915  | 233868  |
| <b>FNDC3B</b> | fibronectin type III domain containing 3B             | 3  | 171757418 | 172119455 | 362038  |
| FNIP1         | folliculin interacting protein 1                      | 5  | 130977407 | 131132710 | 155304  |
| FOCAD         | focadhesin                                            | 9  | 20658308  | 20995954  | 337647  |
| FOLR1         | folate receptor 1                                     | 11 | 71900602  | 71907345  | 6744    |
| FOPNL         | FGFR10P N-terminal like                               | 16 | 15959577  | 15982482  | 22906   |
| FOS           | Fos proto-oncogene, AP-1 transcription factor subunit | 14 | 75745477  | 75748933  | 3457    |
| FOXA1         | forkhead box A1                                       | 14 | 38059189  | 38069245  | 10057   |
| FOXA3         | forkhead box A3                                       | 19 | 46367247  | 46377055  | 9809    |
| FOXG1         | forkhead box G1                                       | 14 | 29235050  | 29238870  | 3821    |
| FOXJ3         | forkhead box J3                                       | 1  | 42642210  | 42801548  | 159339  |

|         |                                                         |    |           |           |         |
|---------|---------------------------------------------------------|----|-----------|-----------|---------|
| FOXN3   | forkhead box N3                                         | 14 | 89591215  | 90085493  | 494279  |
| FOXN4   | forkhead box N4                                         | 12 | 109715784 | 109747025 | 31242   |
| FOXO1   | forkhead box O1                                         | 13 | 41129804  | 41240734  | 110931  |
| FOXO3   | forkhead box O3                                         | 6  | 108881038 | 109005977 | 124940  |
| FOXO6   | forkhead box O6                                         | 1  | 41827594  | 41849262  | 21669   |
| FOXP1   | forkhead box P1                                         | 3  | 71003844  | 71633140  | 629297  |
| FOXP2   | forkhead box P2                                         | 7  | 113726382 | 114333827 | 607446  |
| FRAS1   | Fraser extracellular matrix complex subunit 1           | 4  | 78978724  | 79465423  | 486700  |
| FREM1   | FRAS1 related extracellular matrix 1                    | 9  | 14734664  | 14910993  | 176330  |
| FREM2   | FRAS1 related extracellular matrix protein 2            | 13 | 39261266  | 39460074  | 198809  |
| FREM3   | FRAS1 related extracellular matrix 3                    | 4  | 144498455 | 144621828 | 123374  |
| FRMD3   | FERM domain containing 3                                | 9  | 85857905  | 86153461  | 295557  |
| FRMD4A  | FERM domain containing 4A                               | 10 | 13685706  | 14504141  | 818436  |
| FRMD5   | FERM domain containing 5                                | 15 | 44162962  | 44487450  | 324489  |
| FRMD6   | FERM domain containing 6                                | 14 | 51955818  | 52197445  | 241628  |
| FRMPD2  | FERM and PDZ domain containing 2                        | 10 | 49364601  | 49482941  | 118341  |
| FRMPD4  | FERM and PDZ domain containing 4                        | X  | 12156585  | 12742642  | 586058  |
| FRY     | FRY microtubule binding protein                         | 13 | 32605437  | 32870794  | 265358  |
| FRYL    | FRY like transcription coactivator                      | 4  | 48499378  | 48782339  | 282962  |
| FRZB    | frizzled-related protein                                | 2  | 183698002 | 183731890 | 33889   |
| FSD1L   | fibronectin type III and SPRY domain containing 1 like  | 9  | 108210077 | 108314714 | 104638  |
| FSHR    | follicle stimulating hormone receptor                   | 2  | 49189296  | 49381676  | 192381  |
| FSIP1   | fibrous sheath interacting protein 1                    | 15 | 39892232  | 40075031  | 182800  |
| FSTL1   | follistatin like 1                                      | 3  | 120111140 | 120170100 | 58961   |
| FSTL4   | follistatin like 4                                      | 5  | 132532147 | 132948255 | 416109  |
| FSTL5   | follistatin like 5                                      | 4  | 162305049 | 163085187 | 780139  |
| FTCDNL1 | formiminotransferase cyclodeaminase N-terminal like     | 2  | 200625267 | 200715896 | 90630   |
| FTH1    | ferritin heavy chain 1                                  | 11 | 61727190  | 61735132  | 7943    |
| FTL     | ferritin light chain                                    | 19 | 49468558  | 49470135  | 1578    |
| FTO     | FTO, alpha-ketoglutarate dependent dioxygenase          | 16 | 53737875  | 54155853  | 417979  |
| FTX     | FTX transcript, XIST regulator (non-protein coding)     | X  | 73183790  | 73513409  | 329620  |
| FUS     | FUS RNA binding protein                                 | 16 | 31191431  | 31203127  | 11697   |
| FUT8    | fucosyltransferase 8                                    | 14 | 65877310  | 66210839  | 333530  |
| FUT9    | fucosyltransferase 9                                    | 6  | 96463860  | 96663488  | 199629  |
| FXN     | frataxin                                                | 9  | 71650175  | 71715094  | 64920   |
| FYB     | FYN binding protein                                     | 5  | 39105338  | 39274630  | 169293  |
| FYCO1   | FYVE and coiled-coil domain containing 1                | 3  | 45959396  | 46037316  | 77921   |
| FYN     | FYN proto-oncogene, Src family tyrosine kinase          | 6  | 111981535 | 112194655 | 213121  |
| FYTTD1  | forty-two-three domain containing 1                     | 3  | 197464050 | 197514467 | 50418   |
| FZD3    | frizzled class receptor 3                               | 8  | 28351729  | 28431775  | 80047   |
| GAA     | glucosidase alpha, acid                                 | 17 | 78075355  | 78093678  | 18324   |
| GAB2    | GRB2 associated binding protein 2                       | 11 | 77926343  | 78129394  | 203052  |
| GAB3    | GRB2 associated binding protein 3                       | X  | 153903529 | 153979858 | 76330   |
| GABBR2  | gamma-aminobutyric acid type B receptor subunit 2       | 9  | 101050391 | 101471479 | 421089  |
| GABPB1  | GA binding protein transcription factor beta subunit 1  | 15 | 50569389  | 50647605  | 78217   |
| GABRA1  | gamma-aminobutyric acid type A receptor alpha1 subunit  | 5  | 161274197 | 161326975 | 52779   |
| GABRA2  | gamma-aminobutyric acid type A receptor alpha2 subunit  | 4  | 46250444  | 46477247  | 226804  |
| GABRA3  | gamma-aminobutyric acid type A receptor alpha3 subunit  | X  | 151334706 | 151619830 | 285125  |
| GABRB1  | gamma-aminobutyric acid type A receptor beta1 subunit   | 4  | 46995740  | 47428461  | 432722  |
| GABRB2  | gamma-aminobutyric acid type A receptor beta2 subunit   | 5  | 160715436 | 160976050 | 260615  |
| GABRB3  | gamma-aminobutyric acid type A receptor beta3 subunit   | 15 | 26788693  | 27184686  | 395994  |
| GABRD   | gamma-aminobutyric acid type A receptor delta subunit   | 1  | 1950780   | 1962192   | 11413   |
| GABRG2  | gamma-aminobutyric acid type A receptor gamma2 subunit  | 5  | 161494546 | 161582542 | 87997   |
| GABRG3  | gamma-aminobutyric acid type A receptor gamma3 subunit  | 15 | 27216429  | 27778373  | 561945  |
| GABRR1  | gamma-aminobutyric acid type A receptor rho1 subunit    | 6  | 89887220  | 89940997  | 53778   |
| GAD1    | glutamate decarboxylase 1                               | 2  | 171669723 | 171717661 | 47939   |
| GADL1   | glutamate decarboxylase like 1                          | 3  | 30767692  | 30936257  | 168566  |
| GAK     | cyclin G associated kinase                              | 4  | 843064    | 926161    | 83098   |
| GALC    | galactosylceramidase                                    | 14 | 88304164  | 88460009  | 155846  |
| GALNT1  | polypeptide N-acetylgalactosaminyltransferase 1         | 18 | 33161081  | 33291798  | 130718  |
| GALNT10 | polypeptide N-acetylgalactosaminyltransferase 10        | 5  | 153570290 | 153800544 | 230255  |
| GALNT13 | polypeptide N-acetylgalactosaminyltransferase 13        | 2  | 154728426 | 155310361 | 581936  |
| GALNT14 | polypeptide N-acetylgalactosaminyltransferase 14        | 2  | 31133333  | 31378068  | 244736  |
| GALNT2  | polypeptide N-acetylgalactosaminyltransferase 2         | 1  | 230193536 | 230417870 | 224335  |
| GALNT7  | polypeptide N-acetylgalactosaminyltransferase 7         | 4  | 174089904 | 174245118 | 155215  |
| GALNT9  | polypeptide N-acetylgalactosaminyltransferase 9         | 12 | 132680924 | 132905935 | 225012  |
| GALNTL5 | polypeptide N-acetylgalactosaminyltransferase-like 5    | 7  | 151653464 | 151717019 | 63556   |
| GALNTL6 | polypeptide N-acetylgalactosaminyltransferase-like 6    | 4  | 172733405 | 173962710 | 1229306 |
| GALP    | galanin like peptide                                    | 19 | 56687389  | 56697144  | 9756    |
| GAMT    | guanidinoacetate N-methyltransferase                    | 19 | 1397091   | 1401569   | 4479    |
| GAN     | gigaxonin                                               | 16 | 81348557  | 81424489  | 75933   |
| GAP43   | growth associated protein 43                            | 3  | 115342171 | 115440337 | 98167   |
| GAPDH   | glyceraldehyde-3-phosphate dehydrogenase                | 12 | 6643093   | 6647537   | 4445    |
| GAPDHS  | glyceraldehyde-3-phosphate dehydrogenase, spermatogenic | 19 | 36024314  | 36036218  | 11905   |
| GARS    | glycyl-tRNA synthetase                                  | 7  | 30634297  | 30673649  | 39353   |



|               |                                                                                                                            |    |           |           |        |
|---------------|----------------------------------------------------------------------------------------------------------------------------|----|-----------|-----------|--------|
| GART          | phosphoribosylglycinamide formyltransferase, phosphoribosylglycinamide synthetase, phosphoribosylaminoimidazole synthetase | 21 | 34876238  | 34915797  | 39560  |
| GAS2          | growth arrest specific 2                                                                                                   | 11 | 22647188  | 22834601  | 187414 |
| GAS6-AS2      | GAS6 antisense RNA 2 (head to head)                                                                                        | 13 | 114567141 | 114569806 | 2666   |
| GATA2         | GATA binding protein 2                                                                                                     | 3  | 128198270 | 128212028 | 13759  |
| GATA2-AS1     | GATA2 antisense RNA 1                                                                                                      | 3  | 128208036 | 128216768 | 8733   |
| <b>GATA4</b>  | GATA binding protein 4                                                                                                     | 8  | 11534468  | 11617511  | 83044  |
| GATAD1        | GATA zinc finger domain containing 1                                                                                       | 7  | 92076767  | 92088150  | 11384  |
| GATAD2A       | GATA zinc finger domain containing 2A                                                                                      | 19 | 19496635  | 19619740  | 123106 |
| GATAD2B       | GATA zinc finger domain containing 2B                                                                                      | 1  | 153777201 | 153895451 | 118251 |
| GBA           | glucosylceramidase beta                                                                                                    | 1  | 155204243 | 155214490 | 10248  |
| GBE1          | 1,4-alpha-glucan branching enzyme 1                                                                                        | 3  | 81538850  | 81811312  | 272463 |
| GBF1          | golgi brefeldin A resistant guanine nucleotide exchange factor 1                                                           | 10 | 104005289 | 104142656 | 137368 |
| GBP7          | guanylate binding protein 7                                                                                                | 1  | 89597434  | 89641723  | 44290  |
| GBX1          | gastrulation brain homeobox 1                                                                                              | 7  | 150845676 | 150871832 | 26157  |
| GCH1          | GTP cyclohydrolase 1                                                                                                       | 14 | 55308726  | 55369570  | 60845  |
| GCK           | glucokinase                                                                                                                | 7  | 44183872  | 44237769  | 53898  |
| GCLC          | glutamate-cysteine ligase catalytic subunit                                                                                | 6  | 53362139  | 53481768  | 119630 |
| GCSH          | glycine cleavage system protein H                                                                                          | 16 | 81115566  | 81130008  | 14443  |
| GDAP1         | ganglioside induced differentiation associated protein 1                                                                   | 8  | 75233365  | 75401107  | 167743 |
| GDAP2         | ganglioside induced differentiation associated protein 2                                                                   | 1  | 118406107 | 118472253 | 66147  |
| GDI2          | GDP dissociation inhibitor 2                                                                                               | 10 | 5807186   | 5884095   | 76910  |
| GDNF          | glial cell derived neurotrophic factor                                                                                     | 5  | 37812779  | 37839788  | 27010  |
| GDPD5         | glycerophosphodiester phosphodiesterase domain containing 5                                                                | 11 | 75145685  | 75236948  | 91264  |
| <b>GEMIN6</b> | gem nuclear organelle associated protein 6                                                                                 | 2  | 38978676  | 39012142  | 33467  |
| GET4          | golgi to ER traffic protein 4                                                                                              | 7  | 916189    | 936073    | 19885  |
| GFAP          | glial fibrillary acidic protein                                                                                            | 17 | 42982376  | 42994305  | 11930  |
| GFM2          | G elongation factor mitochondrial 2                                                                                        | 5  | 74017029  | 74063196  | 46168  |
| GGA2          | golgi associated, gamma adaptin ear containing, ARF binding protein 2                                                      | 16 | 23474863  | 23533316  | 58454  |
| GGACT         | gamma-glutamylamine cyclotransferase                                                                                       | 13 | 101183810 | 101241782 | 57973  |
| GGH           | gamma-glutamyl hydrolase                                                                                                   | 8  | 63927638  | 63951730  | 24093  |
| GHR           | growth hormone receptor                                                                                                    | 5  | 42423879  | 42721979  | 298101 |
| GIF           | gastric intrinsic factor                                                                                                   | 11 | 59596741  | 59612974  | 16234  |
| GIGYF2        | GRB10 interacting GYF protein 2                                                                                            | 2  | 233562009 | 233725285 | 163277 |
| GIN1          | gypsy retrotransposon integrase 1                                                                                          | 5  | 102421704 | 102455855 | 34152  |
| GJC1          | gap junction protein gamma 1                                                                                               | 17 | 42875816  | 42908184  | 32369  |
| GJC2          | gap junction protein gamma 2                                                                                               | 1  | 228337553 | 228347527 | 9975   |
| GKS           | glycerol kinase 5 (putative)                                                                                               | 3  | 141882414 | 141944449 | 62036  |
| GLB1          | galactosidase beta 1                                                                                                       | 3  | 33038100  | 33138722  | 100623 |
| GLDC          | glycine decarboxylase                                                                                                      | 9  | 6532464   | 6645650   | 113187 |
| GLDN          | gliomedin                                                                                                                  | 15 | 51633826  | 51700210  | 66385  |
| GLG1          | golgi glycoprotein 1                                                                                                       | 16 | 74485856  | 74641012  | 155157 |
| GLI2          | GLI family zinc finger 2                                                                                                   | 2  | 121493199 | 121750229 | 257031 |
| GLI3          | GLI family zinc finger 3                                                                                                   | 7  | 42000548  | 42277469  | 276922 |
| GLIS1         | GLIS family zinc finger 1                                                                                                  | 1  | 53971910  | 54199877  | 227968 |
| GLIS3         | GLIS family zinc finger 3                                                                                                  | 9  | 3824127   | 4348392   | 524266 |
| GLO1          | glyoxalase I                                                                                                               | 6  | 38643701  | 38670917  | 27217  |
| GLP2R         | glucagon like peptide 2 receptor                                                                                           | 17 | 9725523   | 9795419   | 69897  |
| GLRA1         | glycine receptor alpha 1                                                                                                   | 5  | 151202074 | 151304403 | 102330 |
| GLRB          | glycine receptor beta                                                                                                      | 4  | 157997209 | 158093242 | 96034  |
| GLT1D1        | glycosyltransferase 1 domain containing 1                                                                                  | 12 | 129337972 | 129469509 | 131538 |
| GLUD1         | glutamate dehydrogenase 1                                                                                                  | 10 | 88810243  | 88854623  | 44381  |
| GLUD2         | glutamate dehydrogenase 2                                                                                                  | X  | 120181462 | 120183794 | 2333   |
| GLYR1         | glyoxylate reductase 1 homolog                                                                                             | 16 | 4853204   | 4897343   | 44140  |
| GMDS          | GDP-mannose 4,6-dehydratase                                                                                                | 6  | 1624041   | 2245926   | 621886 |
| GML           | glycosylphosphatidylinositol anchored molecule like                                                                        | 8  | 143915663 | 143997922 | 82260  |
| GMPPB         | GDP-mannose pyrophosphorylase B                                                                                            | 3  | 49754277  | 49761384  | 7108   |
| GMPR          | guanosine monophosphate reductase                                                                                          | 6  | 16238811  | 16295780  | 56970  |
| GNA12         | G protein subunit alpha 12                                                                                                 | 7  | 2767746   | 2883958   | 116213 |
| GNAI1         | G protein subunit alpha i1                                                                                                 | 7  | 79763271  | 79848718  | 85448  |
| GNAI3         | G protein subunit alpha i3                                                                                                 | 1  | 110091233 | 110136975 | 45743  |
| GNAL          | G protein subunit alpha L                                                                                                  | 18 | 11688955  | 11885684  | 196730 |
| GNAO1         | G protein subunit alpha o1                                                                                                 | 16 | 56225302  | 56391356  | 166055 |
| <b>GNAQ</b>   | G protein subunit alpha q                                                                                                  | 9  | 80331003  | 80646374  | 315372 |
| GNB1          | G protein subunit beta 1                                                                                                   | 1  | 1716729   | 1822495   | 105767 |
| GNB3          | G protein subunit beta 3                                                                                                   | 12 | 6949118   | 6956557   | 7440   |
| GNG7          | G protein subunit gamma 7                                                                                                  | 19 | 2511217   | 2702707   | 191491 |
| GNGT1         | G protein subunit gamma transducin 1                                                                                       | 7  | 93220885  | 93540577  | 319693 |
| GNL2          | G protein nucleolar 2                                                                                                      | 1  | 38032417  | 38061536  | 29120  |
| GNPAT         | glyceronephosphate O-acyltransferase                                                                                       | 1  | 231376953 | 231413719 | 36767  |
| GOLM1         | golgi membrane protein 1                                                                                                   | 9  | 88641061  | 88715088  | 74028  |
| GON4L         | gon-4 like                                                                                                                 | 1  | 155719508 | 155829191 | 109684 |
| GOPC          | golgi associated PDZ and coiled-coil motif containing                                                                      | 6  | 117639374 | 117923691 | 284318 |
| GORAB         | golgin, RAB6 interacting                                                                                                   | 1  | 170501270 | 170522587 | 21318  |
| GORASP1       | golgi reassembly stacking protein 1                                                                                        | 3  | 39138150  | 39149854  | 11705  |
| GOSR2         | golgi SNAP receptor complex member 2                                                                                       | 17 | 45000483  | 45105003  | 104521 |

|              |                                                        |    |           |           |         |
|--------------|--------------------------------------------------------|----|-----------|-----------|---------|
| GPATCH2L     | G-patch domain containing 2 like                       | 14 | 76618259  | 76720685  | 102427  |
| GPATCH3      | G-patch domain containing 3                            | 1  | 27216979  | 27226957  | 9979    |
| GPATCH8      | G-patch domain containing 8                            | 17 | 42472652  | 42580798  | 108147  |
| GPC3         | glypican 3                                             | X  | 132669773 | 133119922 | 450150  |
| GPC5         | glypican 5                                             | 13 | 92050929  | 93519490  | 1468562 |
| GPC6         | glypican 6                                             | 13 | 93879095  | 95059655  | 1180561 |
| GPCPD1       | glycerophosphocholine phosphodiesterase 1              | 20 | 5525085   | 5591672   | 66588   |
| GPD1L        | glycerol-3-phosphate dehydrogenase 1-like              | 3  | 32147181  | 32210205  | 63025   |
| GPHN         | gephyrin                                               | 14 | 66974125  | 67648520  | 674396  |
| GPM6A        | glycoprotein M6A                                       | 4  | 176554085 | 176923815 | 369731  |
| GPM6B        | glycoprotein M6B                                       | X  | 13789150  | 13956757  | 167608  |
| GPR132       | G protein-coupled receptor 132                         | 14 | 105515728 | 105531782 | 16055   |
| GPR137C      | G protein-coupled receptor 137C                        | 14 | 53019866  | 53104431  | 84566   |
| GPR157       | G protein-coupled receptor 157                         | 1  | 9160364   | 9189229   | 28866   |
| GPR158       | G protein-coupled receptor 158                         | 10 | 25463991  | 25891155  | 427165  |
| GPR180       | G protein-coupled receptor 180                         | 13 | 95254157  | 95286899  | 32743   |
| <b>GPR37</b> | G protein-coupled receptor 37                          | 7  | 124386051 | 124405681 | 19631   |
| GPR39        | G protein-coupled receptor 39                          | 2  | 133174147 | 133404132 | 229986  |
| GPRC5B       | G protein-coupled receptor class C group 5 member B    | 16 | 19868616  | 19897489  | 28874   |
| GPRIN3       | GPRIN family member 3                                  | 4  | 90157537  | 90229161  | 71625   |
| GPSM2        | G protein signaling modulator 2                        | 1  | 109417972 | 109477167 | 59196   |
| GPSM3        | G protein signaling modulator 3                        | 6  | 32158543  | 32163300  | 4758    |
| GRB10        | growth factor receptor bound protein 10                | 7  | 50657760  | 50861159  | 203400  |
| <b>GRB14</b> | growth factor receptor bound protein 14                | 2  | 165349322 | 165478358 | 129037  |
| GRB2         | growth factor receptor bound protein 2                 | 17 | 73314157  | 73401790  | 87634   |
| GREB1        | growth regulation by estrogen in breast cancer 1       | 2  | 11674242  | 11782914  | 108673  |
| GREB1L       | growth regulation by estrogen in breast cancer 1 like  | 18 | 18822203  | 19105378  | 283176  |
| GRHL2        | grainyhead like transcription factor 2                 | 8  | 102504660 | 102681954 | 177295  |
| GRIA1        | glutamate ionotropic receptor AMPA type subunit 1      | 5  | 152869175 | 153193429 | 324255  |
| GRIA3        | glutamate ionotropic receptor AMPA type subunit 3      | X  | 122318006 | 122624766 | 306761  |
| GRIA4        | glutamate ionotropic receptor AMPA type subunit 4      | 11 | 105480721 | 105852819 | 372099  |
| GRID1        | glutamate ionotropic receptor delta type subunit 1     | 10 | 87359312  | 88126250  | 766939  |
| GRID2        | glutamate ionotropic receptor delta type subunit 2     | 4  | 93225550  | 94695707  | 1470158 |
| <b>GRIK1</b> | glutamate ionotropic receptor kainate type subunit 1   | 21 | 30909254  | 31312351  | 403098  |
| <b>GRIK2</b> | glutamate ionotropic receptor kainate type subunit 2   | 6  | 101846664 | 102517958 | 671295  |
| GRIN1        | glutamate ionotropic receptor NMDA type subunit 1      | 9  | 140032842 | 140063207 | 30366   |
| GRIN2A       | glutamate ionotropic receptor NMDA type subunit 2A     | 16 | 9852376   | 10276611  | 424236  |
| GRIN2B       | glutamate ionotropic receptor NMDA type subunit 2B     | 12 | 13693165  | 14133053  | 439889  |
| GRIN3A       | glutamate ionotropic receptor NMDA type subunit 3A     | 9  | 104331635 | 104500862 | 169228  |
| GRIN3B       | glutamate ionotropic receptor NMDA type subunit 3B     | 19 | 1000418   | 1009731   | 9314    |
| GRIP1        | glutamate receptor interacting protein 1               | 12 | 66741211  | 67197966  | 456756  |
| GRK5         | G protein-coupled receptor kinase 5                    | 10 | 120967101 | 121215131 | 248031  |
| GRK6         | G protein-coupled receptor kinase 6                    | 5  | 176830205 | 176869902 | 39698   |
| GRM1         | glutamate metabotropic receptor 1                      | 6  | 146348782 | 146758734 | 409953  |
| GRM3         | glutamate metabotropic receptor 3                      | 7  | 86273230  | 86494200  | 220971  |
| GRM5         | glutamate metabotropic receptor 5                      | 11 | 88237744  | 88799113  | 561370  |
| GRM7         | glutamate metabotropic receptor 7                      | 3  | 6811688   | 7783215   | 971528  |
| GRM8         | glutamate metabotropic receptor 8                      | 7  | 126078652 | 126893348 | 814697  |
| <b>GRN</b>   | granulin precursor                                     | 17 | 42422614  | 42430470  | 7857    |
| GRXCR1       | glutaredoxin and cysteine rich domain containing 1     | 4  | 42895284  | 43032675  | 137392  |
| GSAP         | gamma-secretase activating protein                     | 7  | 76940068  | 77045717  | 105650  |
| <b>GSDMD</b> | gasdermin D                                            | 8  | 144635377 | 144645232 | 9856    |
| GSG1         | germ cell associated 1                                 | 12 | 13236494  | 13256619  | 20126   |
| GSG1L        | GSG1 like                                              | 16 | 27798850  | 28074830  | 275981  |
| GSK3B        | glycogen synthase kinase 3 beta                        | 3  | 119540170 | 119813264 | 273095  |
| GSPT2        | G1 to S phase transition 2                             | X  | 51486481  | 51489324  | 2844    |
| GSTA4        | glutathione S-transferase alpha 4                      | 6  | 52842751  | 52860176  | 17426   |
| GSTCD        | glutathione S-transferase C-terminal domain containing | 4  | 106629935 | 106768885 | 138951  |
| GSTM1        | glutathione S-transferase mu 1                         | 1  | 110230436 | 110251661 | 21226   |
| GSTM3        | glutathione S-transferase mu 3                         | 1  | 110276554 | 110284384 | 7831    |
| GSTO1        | glutathione S-transferase omega 1                      | 10 | 105995114 | 106027217 | 32104   |
| GSTO2        | glutathione S-transferase omega 2                      | 10 | 106028631 | 106064703 | 36073   |
| GSTP1        | glutathione S-transferase pi 1                         | 11 | 67351066  | 67354131  | 3066    |
| GSTT1        | glutathione S-transferase theta 1                      | 22 | 24376133  | 24384680  | 8548    |
| GSTZ1        | glutathione S-transferase zeta 1                       | 14 | 77787227  | 77797940  | 10714   |
| GTDC1        | glycosyltransferase like domain containing 1           | 2  | 144695635 | 145090135 | 394501  |
| GTF2E2       | general transcription factor IIE subunit 2             | 8  | 30435835  | 30515768  | 79934   |
| GTF2H3       | general transcription factor IIH subunit 3             | 12 | 124118375 | 124147153 | 28779   |
| GTF2I        | general transcription factor Ili                       | 7  | 74071994  | 74175026  | 103033  |
| GTF3A        | general transcription factor IIIA                      | 13 | 27998681  | 28009958  | 11278   |
| GTF3C1       | general transcription factor IIIC subunit 1            | 16 | 27470876  | 27561234  | 90359   |
| GUCY1A2      | guanylate cyclase 1 soluble subunit alpha 2            | 11 | 106544738 | 106889250 | 344513  |
| GUCY1A3      | guanylate cyclase 1 soluble subunit alpha              | 4  | 156587863 | 156653501 | 65639   |
| GUCY2EP      | guanylate cyclase 2E, pseudogene                       | 11 | 76405087  | 76418685  | 13599   |
| GUCY2F       | guanylate cyclase 2F, retinal                          | X  | 108616135 | 108725301 | 109167  |
| GULP1        | GULP, engulfment adaptor PTB domain containing 1       | 2  | 189156396 | 189460653 | 304258  |
| GUSBP11      | glucuronidase, beta pseudogene 11                      | 22 | 23980674  | 24059543  | 78870   |

|           |                                                                                                                 |    |           |           |        |
|-----------|-----------------------------------------------------------------------------------------------------------------|----|-----------|-----------|--------|
| GUSBP3    | glucuronidase, beta pseudogene 3                                                                                | 5  | 68790040  | 69006341  | 216302 |
| GYS2      | glycogen synthase 2                                                                                             | 12 | 21689123  | 21757781  | 68659  |
| H2AFY     | H2A histone family member Y                                                                                     | 5  | 134669590 | 134735604 | 66015  |
| HABP4     | hyaluronan binding protein 4                                                                                    | 9  | 99212483  | 99253618  | 41136  |
| HADHB     | hydroxyacyl-CoA dehydrogenase/3-ketoacyl-CoA thiolase/enoyl-CoA hydratase (trifunctional protein), beta subunit | 2  | 26466038  | 26513336  | 47299  |
| HAND1     | heart and neural crest derivatives expressed 1                                                                  | 5  | 153854532 | 153857824 | 3293   |
| HAO1      | hydroxyacid oxidase 1                                                                                           | 20 | 7863628   | 7921121   | 57494  |
| HAO2      | hydroxyacid oxidase 2                                                                                           | 1  | 119911402 | 119936753 | 25352  |
| HARS      | histidyl-tRNA synthetase                                                                                        | 5  | 140052758 | 140071609 | 18852  |
| HAX1      | HCLS1 associated protein X-1                                                                                    | 1  | 154244987 | 154248351 | 3365   |
| HBB       | hemoglobin subunit beta                                                                                         | 11 | 5246694   | 5250625   | 3932   |
| HBP1      | HMG-box transcription factor 1                                                                                  | 7  | 106809406 | 106842974 | 33569  |
| HBS1L     | HBS1 like translational GTPase                                                                                  | 6  | 135281516 | 135424194 | 142679 |
| HCK       | HCK proto-oncogene, Src family tyrosine kinase                                                                  | 20 | 30639991  | 30689659  | 49669  |
| HCN1      | hyperpolarization activated cyclic nucleotide gated potassium channel 1                                         | 5  | 45259349  | 45696253  | 436905 |
| HCRTR2    | hypocretin receptor 2                                                                                           | 6  | 55039050  | 55147418  | 108369 |
| HDAC2     | histone deacetylase 2                                                                                           | 6  | 114254192 | 114332472 | 78281  |
| HDAC4     | histone deacetylase 4                                                                                           | 2  | 239969864 | 240323348 | 353485 |
| HDAC6     | histone deacetylase 6                                                                                           | X  | 48659784  | 48683392  | 23609  |
| HDAC8     | histone deacetylase 8                                                                                           | X  | 71549366  | 71792953  | 243588 |
| HDAC9     | histone deacetylase 9                                                                                           | 7  | 18126572  | 19042039  | 915468 |
| HDLBP     | high density lipoprotein binding protein                                                                        | 2  | 242166679 | 242256476 | 89798  |
| HDX       | highly divergent homeobox                                                                                       | X  | 83572882  | 83757487  | 184606 |
| HEATR6    | HEAT repeat containing 6                                                                                        | 17 | 58120555  | 58156292  | 35738  |
| HECTD1    | HECT domain E3 ubiquitin protein ligase 1                                                                       | 14 | 31569318  | 31677010  | 107693 |
| HECW1     | HECT, C2 and WW domain containing E3 ubiquitin protein ligase 1                                                 | 7  | 43152198  | 43605600  | 453403 |
| HECW2     | HECT, C2 and WW domain containing E3 ubiquitin protein ligase 2                                                 | 2  | 197059094 | 197458416 | 399323 |
| HELZ      | helicase with zinc finger                                                                                       | 17 | 65066554  | 65242105  | 175552 |
| HERC1     | HECT and RLD domain containing E3 ubiquitin protein ligase family member 1                                      | 15 | 63900817  | 64126141  | 225325 |
| HERC2     | HECT and RLD domain containing E3 ubiquitin protein ligase 2                                                    | 15 | 28356186  | 28567298  | 211113 |
| HERC3     | HECT and RLD domain containing E3 ubiquitin protein ligase 3                                                    | 4  | 89442199  | 89629693  | 187495 |
| HERC4     | HECT and RLD domain containing E3 ubiquitin protein ligase 4                                                    | 10 | 69681665  | 69835105  | 153441 |
| HEXA      | hexosaminidase subunit alpha                                                                                    | 15 | 72635775  | 72668817  | 33043  |
| HEXA-AS1  | HEXA antisense RNA 1                                                                                            | 15 | 72668454  | 72671129  | 2676   |
| HFE       | hemochromatosis                                                                                                 | 6  | 26087509  | 26098571  | 11063  |
| HFM1      | HFM1, ATP dependent DNA helicase homolog                                                                        | 1  | 91726323  | 91870426  | 144104 |
| HGF       | hepatocyte growth factor                                                                                        | 7  | 81328322  | 81399754  | 71433  |
| HHAT      | hedgehog acyltransferase                                                                                        | 1  | 210501596 | 210849638 | 348043 |
| HHEX      | hematopoietically expressed homeobox                                                                            | 10 | 94447945  | 94455403  | 7459   |
| HIBADH    | 3-hydroxyisobutyrate dehydrogenase                                                                              | 7  | 27565061  | 27702614  | 137554 |
| HIF1A     | hypoxia inducible factor 1 alpha subunit                                                                        | 14 | 62162231  | 62214976  | 52746  |
| HINT1     | histidine triad nucleotide binding protein 1                                                                    | 5  | 130494720 | 130507428 | 12709  |
| HIP1      | huntingtin interacting protein 1                                                                                | 7  | 75162621  | 75368280  | 205660 |
| HIPK2     | homeodomain interacting protein kinase 2                                                                        | 7  | 139246316 | 139477577 | 231262 |
| HIRA      | histone cell cycle regulator                                                                                    | 22 | 19318221  | 19435224  | 117004 |
| HIST1H1C  | histone cluster 1 H1 family member c                                                                            | 6  | 26055968  | 26056699  | 732    |
| HIST1H2BD | histone cluster 1 H2B family member d                                                                           | 6  | 26158349  | 26171577  | 13229  |
| HIVEP2    | human immunodeficiency virus type 1 enhancer binding protein 2                                                  | 6  | 143072604 | 143266338 | 193735 |
| HIVEP3    | human immunodeficiency virus type 1 enhancer binding protein 3                                                  | 1  | 41972036  | 42501596  | 529561 |
| HJURP     | Holliday junction recognition protein                                                                           | 2  | 234742062 | 234763212 | 21151  |
| HK1       | hexokinase 1                                                                                                    | 10 | 71029740  | 71161638  | 131899 |
| HLA-A     | major histocompatibility complex, class I, A                                                                    | 6  | 29909037  | 29913661  | 4625   |
| HLA-DRA   | major histocompatibility complex, class II, DR alpha                                                            | 6  | 32407619  | 32412823  | 5205   |
| HLA-DRB5  | major histocompatibility complex, class II, DR beta 5                                                           | 6  | 32485120  | 32498064  | 12945  |
| HLCS      | holocarboxylase synthetase                                                                                      | 21 | 38123189  | 38362536  | 239348 |
| HLF       | HLF, PAR bZIP transcription factor                                                                              | 17 | 53342373  | 53402426  | 60054  |
| HMBOX1    | homeobox containing 1                                                                                           | 8  | 28747911  | 28922281  | 174371 |
| HMCN1     | hemicentin 1                                                                                                    | 1  | 185703683 | 186160085 | 456403 |
| HMCN2     | hemicentin 2                                                                                                    | 9  | 133046882 | 133309510 | 262629 |
| HMG20A    | high mobility group 20A                                                                                         | 15 | 77712754  | 77777949  | 65196  |
| HMGGA2    | high mobility group AT-hook 2                                                                                   | 12 | 66217911  | 66360075  | 142165 |
| HMGCR     | 3-hydroxy-3-methylglutaryl-CoA reductase                                                                        | 5  | 74632154  | 74657929  | 25776  |
| HMGCS1    | 3-hydroxy-3-methylglutaryl-CoA synthase 1                                                                       | 5  | 43289497  | 43313614  | 24118  |
| HMGCS2    | 3-hydroxy-3-methylglutaryl-CoA synthase 2                                                                       | 1  | 120290619 | 120311528 | 20910  |
| HMGN2P46  | high mobility group nucleosomal binding domain 2 pseudogene 46                                                  | 15 | 45803334  | 45878488  | 75155  |
| HMGN3     | high mobility group nucleosomal binding domain 3                                                                | 6  | 79910962  | 79944406  | 33445  |
| HMGN5     | high mobility group nucleosome binding domain 5                                                                 | X  | 80369200  | 80457441  | 88242  |
| HMGXB4    | HMG-box containing 4                                                                                            | 22 | 35653445  | 35691800  | 38356  |
| HMMR      | hyaluronan mediated motility receptor                                                                           | 5  | 162887209 | 162918947 | 31739  |
| HMOX1     | heme oxygenase 1                                                                                                | 22 | 35776354  | 35790207  | 13854  |
| HMOX2     | heme oxygenase 2                                                                                                | 16 | 4524691   | 4560348   | 35658  |
| HNF4A     | hepatocyte nuclear factor 4 alpha                                                                               | 20 | 42984340  | 43061485  | 77146  |
| HNMT      | histamine N-methyltransferase                                                                                   | 2  | 138721590 | 138773930 | 52341  |
| HNRNPA1   | heterogeneous nuclear ribonucleoprotein A1                                                                      | 12 | 54673977  | 54680872  | 6896   |

|                  |                                                              |    |           |           |        |
|------------------|--------------------------------------------------------------|----|-----------|-----------|--------|
| <b>HNRNPA2B1</b> | heterogeneous nuclear ribonucleoprotein A2/B1                | 7  | 26229547  | 26241149  | 11603  |
| HNRNPD           | heterogeneous nuclear ribonucleoprotein D                    | 4  | 83273651  | 83295656  | 22006  |
| HNRNPH1          | heterogeneous nuclear ribonucleoprotein H1                   | 5  | 179041179 | 179061785 | 20607  |
| HNRNPLL          | heterogeneous nuclear ribonucleoprotein L like               | 2  | 38789120  | 38830728  | 41609  |
| HNRNPU           | heterogeneous nuclear ribonucleoprotein U                    | 1  | 245014468 | 245027844 | 13377  |
| HNRNPUL1         | heterogeneous nuclear ribonucleoprotein U like 1             | 19 | 41768401  | 41813503  | 45103  |
| HOMER1           | homer scaffolding protein 1                                  | 5  | 78668459  | 78810040  | 141582 |
| HOMER2           | homer scaffolding protein 2                                  | 15 | 83509838  | 83654661  | 144824 |
| HORMAD2          | HORMA domain containing 2                                    | 22 | 30476163  | 30573064  | 96902  |
| HOXC4            | homeobox C4                                                  | 12 | 54410715  | 54449813  | 39099  |
| HP               | haptoglobin                                                  | 16 | 72088491  | 72094954  | 6464   |
| HPD              | 4-hydroxyphenylpyruvate dioxygenase                          | 12 | 122277433 | 122301502 | 24070  |
| HPS3             | HPS3, biogenesis of lysosomal organelles complex 2 subunit 1 | 3  | 148847371 | 148891519 | 44149  |
| HPS5             | HPS5, biogenesis of lysosomal organelles complex 2 subunit 2 | 11 | 18300223  | 18343745  | 43523  |
| HPSE2            | heparanase 2 (inactive)                                      | 10 | 100218875 | 100995619 | 776745 |
| HS1BP3           | HCLS1 binding protein 3                                      | 2  | 20760208  | 20850849  | 90642  |
| HS2ST1           | heparan sulfate 2-O-sulfotransferase 1                       | 1  | 87380331  | 87602334  | 222004 |
| HS3ST3A1         | heparan sulfate-glucosamine 3-sulfotransferase 3A1           | 17 | 13399006  | 13505244  | 106239 |
| HS3ST4           | heparan sulfate-glucosamine 3-sulfotransferase 4             | 16 | 25703347  | 26149009  | 445663 |
| HS6ST1           | heparan sulfate 6-O-sulfotransferase 1                       | 2  | 128994290 | 129076151 | 81862  |
| HS6ST3           | heparan sulfate 6-O-sulfotransferase 3                       | 13 | 96743093  | 97485671  | 742579 |
| HSD11B1          | hydroxysteroid 11-beta dehydrogenase 1                       | 1  | 209859510 | 209908295 | 48786  |
| HSD17B13         | hydroxysteroid 17-beta dehydrogenase 13                      | 4  | 88224941  | 88244058  | 19118  |
| HSD17B7P2        | hydroxysteroid 17-beta dehydrogenase 7 pseudogene 2          | 10 | 38645305  | 38667433  | 22129  |
| HSDL1            | hydroxysteroid dehydrogenase like 1                          | 16 | 84155886  | 84178797  | 22912  |
| HSF2             | heat shock transcription factor 2                            | 6  | 122720691 | 122754264 | 33574  |
| HSF2BP           | heat shock transcription factor 2 binding protein            | 21 | 44949072  | 45079374  | 130303 |
| HSP90AA1         | heat shock protein 90 alpha family class A member 1          | 14 | 102547075 | 102606036 | 58962  |
| <b>HSPA12B</b>   | heat shock protein family A (Hsp70) member 12B               | 20 | 3713314   | 3733758   | 20445  |
| HSPA14           | heat shock protein family A (Hsp70) member 14                | 10 | 14880163  | 14913740  | 33578  |
| HSPA1A           | heat shock protein family A (Hsp70) member 1A                | 6  | 31783291  | 31785723  | 2433   |
| HSPA1B           | heat shock protein family A (Hsp70) member 1B                | 6  | 31795512  | 31798031  | 2520   |
| HSPA1L           | heat shock protein family A (Hsp70) member 1 like            | 6  | 31777396  | 31783437  | 6042   |
| HSPA5            | heat shock protein family A (Hsp70) member 5                 | 9  | 127997132 | 128003609 | 6478   |
| HSPA8            | heat shock protein family A (Hsp70) member 8                 | 11 | 122928197 | 122933938 | 5742   |
| HSPA9            | heat shock protein family A (Hsp70) member 9                 | 5  | 137890571 | 137911133 | 20563  |
| HSPB1            | heat shock protein family B (small) member 1                 | 7  | 75931861  | 75933612  | 1752   |
| HSPB3            | heat shock protein family B (small) member 3                 | 5  | 53751445  | 53752207  | 763    |
| HSPB8            | heat shock protein family B (small) member 8                 | 12 | 119616447 | 119658936 | 42490  |
| HSPBAP1          | HSPB1 associated protein 1                                   | 3  | 122458846 | 122512671 | 53826  |
| HSPD1            | heat shock protein family D (Hsp60) member 1                 | 2  | 198351305 | 198381461 | 30157  |
| HSPG2            | heparan sulfate proteoglycan 2                               | 1  | 22148738  | 22263790  | 115053 |
| HTR1E            | 5-hydroxytryptamine receptor 1E                              | 6  | 87647024  | 87726349  | 79326  |
| HTR2A            | 5-hydroxytryptamine receptor 2A                              | 13 | 47405685  | 47471169  | 65485  |
| HTR2C            | 5-hydroxytryptamine receptor 2C                              | X  | 113818551 | 114144624 | 326074 |
| HTR4             | 5-hydroxytryptamine receptor 4                               | 5  | 147830595 | 148056798 | 226204 |
| HTR6             | 5-hydroxytryptamine receptor 6                               | 1  | 19991780  | 20006055  | 14276  |
| HTR7             | 5-hydroxytryptamine receptor 7                               | 10 | 92500578  | 92617671  | 117094 |
| HTRA1            | HtrA serine peptidase 1                                      | 10 | 124221041 | 124274424 | 53384  |
| HTRA2            | HtrA serine peptidase 2                                      | 2  | 74756504  | 74760472  | 3969   |
| HTT              | huntingtin                                                   | 4  | 3076408   | 3245676   | 169269 |
| HYAL2            | hyaluronoglucosaminidase 2                                   | 3  | 50355221  | 50360337  | 5117   |
| HYAL4            | hyaluronoglucosaminidase 4                                   | 7  | 123469037 | 123517532 | 48496  |
| HYDIN            | HYDIN, axonemal central pair apparatus protein               | 16 | 70841281  | 71264625  | 423345 |
| HYKK             | hydroxylysine kinase                                         | 15 | 78799906  | 78829714  | 29809  |
| ICA1             | islet cell autoantigen 1                                     | 7  | 8152814   | 8302317   | 149504 |
| ICA1L            | islet cell autoantigen 1 like                                | 2  | 203640690 | 203736708 | 96019  |
| ICAM1            | intercellular adhesion molecule 1                            | 19 | 10381511  | 10397291  | 15781  |
| ICK              | intestinal cell kinase                                       | 6  | 52866077  | 52926600  | 60524  |
| IDE              | insulin degrading enzyme                                     | 10 | 94211441  | 94333833  | 122393 |
| IDH1             | isocitrate dehydrogenase (NADP(+)) 1, cytosolic              | 2  | 209100951 | 209130798 | 29848  |
| IDH3B            | isocitrate dehydrogenase 3 (NAD(+)) beta                     | 20 | 2639041   | 2644865   | 5825   |
| IER3IP1          | immediate early response 3 interacting protein 1             | 18 | 44661027  | 44702652  | 41626  |
| IFI16            | interferon gamma inducible protein 16                        | 1  | 158969758 | 159024945 | 55188  |
| IFNG             | interferon gamma                                             | 12 | 68548548  | 68553527  | 4980   |
| IFT57            | intraflagellar transport 57                                  | 3  | 107879659 | 107941417 | 61759  |
| IFT88            | intraflagellar transport 88                                  | 13 | 21140585  | 21265503  | 124919 |
| IGF1             | insulin like growth factor 1                                 | 12 | 102789645 | 102874423 | 84779  |
| IGF1R            | insulin like growth factor 1 receptor                        | 15 | 99192200  | 99507759  | 315560 |
| IGF2             | insulin like growth factor 2                                 | 11 | 2150342   | 2170833   | 20492  |
| IGF2BP2          | insulin like growth factor 2 mRNA binding protein 2          | 3  | 185361527 | 185542844 | 181318 |
| IGF2BP3          | insulin like growth factor 2 mRNA binding protein 3          | 7  | 23349828  | 23510086  | 160259 |
| IGFBP5           | insulin like growth factor binding protein 5                 | 2  | 217536828 | 217560248 | 23421  |
| IGFBP7           | insulin like growth factor binding protein 7                 | 4  | 57896939  | 57976551  | 79613  |
| IGHMBP2          | immunoglobulin mu binding protein 2                          | 11 | 68671310  | 68708070  | 36761  |
| IGSF11           | immunoglobulin superfamily member 11                         | 3  | 118619404 | 118864915 | 245512 |
| IGSF21           | immunoglobulin superfamily member 21                         | 1  | 18434240  | 18704977  | 270738 |

|              |                                                                                                  |    |           |           |         |
|--------------|--------------------------------------------------------------------------------------------------|----|-----------|-----------|---------|
| IKBKAP       | inhibitor of kappa light polypeptide gene enhancer in B-cells, kinase complex-associated protein | 9  | 111629797 | 111696396 | 66600   |
| IKZF2        | IKAROS family zinc finger 2                                                                      | 2  | 213864429 | 214017151 | 152723  |
| IKZF3        | IKAROS family zinc finger 3                                                                      | 17 | 37921198  | 38020441  | 99244   |
| IL10         | interleukin 10                                                                                   | 1  | 206940947 | 206945839 | 4893    |
| IL12A-AS1    | IL12A antisense RNA 1                                                                            | 3  | 159631189 | 159943086 | 311898  |
| IL17A        | interleukin 17A                                                                                  | 6  | 52051185  | 52055436  | 4252    |
| IL18         | interleukin 18                                                                                   | 11 | 112013974 | 112034840 | 20867   |
| IL1A         | interleukin 1 alpha                                                                              | 2  | 113531492 | 113542167 | 10676   |
| IL1B         | interleukin 1 beta                                                                               | 2  | 113587328 | 113594480 | 7153    |
| IL1RAP       | interleukin 1 receptor accessory protein                                                         | 3  | 190231840 | 190375843 | 144004  |
| IL1RAPL1     | interleukin 1 receptor accessory protein like 1                                                  | X  | 28605516  | 29974840  | 1369325 |
| IL1RAPL2     | interleukin 1 receptor accessory protein like 2                                                  | X  | 103810996 | 105011822 | 1200827 |
| IL1RL2       | interleukin 1 receptor like 2                                                                    | 2  | 102803433 | 102856462 | 53030   |
| IL1RN        | interleukin 1 receptor antagonist                                                                | 2  | 113864791 | 113891593 | 26803   |
| IL2          | interleukin 2                                                                                    | 4  | 123372625 | 123377880 | 5256    |
| IL20RA       | interleukin 20 receptor subunit alpha                                                            | 6  | 137321108 | 137366298 | 45191   |
| IL24         | interleukin 24                                                                                   | 1  | 207070788 | 207077484 | 6697    |
| IL33         | interleukin 33                                                                                   | 9  | 6215805   | 6257983   | 42179   |
| IL4          | interleukin 4                                                                                    | 5  | 132009678 | 132018368 | 8691    |
| IL6          | interleukin 6                                                                                    | 7  | 22765503  | 22771621  | 6119    |
| IL6ST        | interleukin 6 signal transducer                                                                  | 5  | 55230923  | 55290821  | 59899   |
| ILDR2        | immunoglobulin like domain containing receptor 2                                                 | 1  | 166882443 | 166944719 | 62277   |
| ILKAP        | ILK associated serine/threonine phosphatase                                                      | 2  | 239079042 | 239112370 | 33329   |
| IMMP1L       | inner mitochondrial membrane peptidase subunit 1                                                 | 11 | 31453948  | 31531192  | 77245   |
| IMMP2L       | inner mitochondrial membrane peptidase subunit 2                                                 | 7  | 110303110 | 111202573 | 899464  |
| IMPA1        | inositol monophosphatase 1                                                                       | 8  | 82570196  | 82598928  | 28733   |
| IMPDH1       | inosine monophosphate dehydrogenase 1                                                            | 7  | 128032331 | 128050306 | 17976   |
| INHBA        | inhibin beta A subunit                                                                           | 7  | 41724712  | 41742706  | 17995   |
| INO80        | INO80 complex subunit                                                                            | 15 | 41271078  | 41408552  | 137475  |
| INO80D       | INO80 complex subunit D                                                                          | 2  | 206858445 | 206951027 | 92583   |
| INPP4B       | inositol polyphosphate-4-phosphatase type II B                                                   | 4  | 142944313 | 143768585 | 824273  |
| INPP5A       | inositol polyphosphate-5-phosphatase A                                                           | 10 | 134351324 | 134596979 | 245656  |
| INPP5D       | inositol polyphosphate-5-phosphatase D                                                           | 2  | 233924677 | 234116549 | 191873  |
| INPP5F       | inositol polyphosphate-5-phosphatase F                                                           | 10 | 121485609 | 121588652 | 103044  |
| INS-IGF2     | INS-IGF2 readthrough                                                                             | 11 | 2153768   | 2182439   | 28672   |
| INSR         | insulin receptor                                                                                 | 19 | 7112266   | 7294045   | 181780  |
| INTS7        | integrator complex subunit 7                                                                     | 1  | 212113741 | 212208884 | 95144   |
| INTS9        | integrator complex subunit 9                                                                     | 8  | 28625178  | 28747759  | 122582  |
| INVS         | inversin                                                                                         | 9  | 102861538 | 103063282 | 201745  |
| <b>IP6K2</b> | inositol hexakisphosphate kinase 2                                                               | 3  | 48725436  | 48777786  | 52351   |
| IPCEF1       | interaction protein for cytohesin exchange factors 1                                             | 6  | 154475631 | 154677926 | 202296  |
| IPMK         | inositol polyphosphate multikinase                                                               | 10 | 59951278  | 60027694  | 76417   |
| IPO11        | importin 11                                                                                      | 5  | 61699799  | 61924409  | 224611  |
| IPO5         | importin 5                                                                                       | 13 | 98605912  | 98676551  | 70640   |
| IPP          | intracisternal A particle-promoted polypeptide                                                   | 1  | 46159996  | 46216322  | 56327   |
| IQCG         | IQ motif containing G                                                                            | 3  | 197615946 | 197687013 | 71068   |
| IQCH         | IQ motif containing H                                                                            | 15 | 67547138  | 67794598  | 247461  |
| IQCJ         | IQ motif containing J                                                                            | 3  | 158680717 | 158984096 | 303380  |
| IQCJ-SCHIP1  | IQCJ-SCHIP1 readthrough                                                                          | 3  | 158680024 | 159615155 | 935132  |
| IQGAP2       | IQ motif containing GTPase activating protein 2                                                  | 5  | 75699074  | 76003957  | 304884  |
| IQSEC1       | IQ motif and Sec7 domain 1                                                                       | 3  | 12938719  | 13114617  | 175899  |
| IQSEC2       | IQ motif and Sec7 domain 2                                                                       | X  | 53262058  | 53350522  | 88465   |
| IREB2        | iron responsive element binding protein 2                                                        | 15 | 78729773  | 78793798  | 64026   |
| IRF1         | interferon regulatory factor 1                                                                   | 5  | 131817301 | 131826490 | 9190    |
| IRF2         | interferon regulatory factor 2                                                                   | 4  | 185308867 | 185395734 | 86868   |
| IRF2BP2      | interferon regulatory factor 2 binding protein 2                                                 | 1  | 234740015 | 234745271 | 5257    |
| IRS1         | insulin receptor substrate 1                                                                     | 2  | 227596033 | 227664475 | 68443   |
| ISL1         | ISL LIM homeobox 1                                                                               | 5  | 50678921  | 50690564  | 11644   |
| ISPD         | isoprenoid synthase domain containing                                                            | 7  | 16130817  | 16460947  | 330131  |
| ISY1-RAB43   | ISY1-RAB43 readthrough                                                                           | 3  | 128806418 | 128879879 | 73462   |
| ITFG1        | integrin alpha FG-GAP repeat containing 1                                                        | 16 | 47188298  | 47498060  | 309763  |
| ITGA11       | integrin subunit alpha 11                                                                        | 15 | 68594050  | 68724501  | 130452  |
| ITGA2        | integrin subunit alpha 2                                                                         | 5  | 52285156  | 52390609  | 105454  |
| ITGA4        | integrin subunit alpha 4                                                                         | 2  | 182321929 | 182400914 | 78986   |
| ITGA6        | integrin subunit alpha 6                                                                         | 2  | 173292082 | 173371181 | 79100   |
| ITGA8        | integrin subunit alpha 8                                                                         | 10 | 15555948  | 15762124  | 206177  |
| ITGA9        | integrin subunit alpha 9                                                                         | 3  | 37493606  | 37865005  | 371400  |
| ITGAE        | integrin subunit alpha E                                                                         | 17 | 3617922   | 3704537   | 86616   |
| ITGB2        | integrin subunit beta 2                                                                          | 21 | 46305868  | 46351904  | 46037   |
| ITGB5        | integrin subunit beta 5                                                                          | 3  | 124480795 | 124620265 | 139471  |
| <b>ITGB6</b> | integrin subunit beta 6                                                                          | 2  | 160956177 | 161128399 | 172223  |
| ITIH4        | inter-alpha-trypsin inhibitor heavy chain family member 4                                        | 3  | 52846991  | 52865495  | 18505   |
| ITM2A        | integral membrane protein 2A                                                                     | X  | 78615881  | 78623164  | 7284    |
| ITPK1        | inositol-tetrakisphosphate 1-kinase                                                              | 14 | 93403259  | 93582665  | 179407  |
| ITPKB        | inositol-trisphosphate 3-kinase B                                                                | 1  | 226819391 | 226927024 | 107634  |
| ITPR1        | inositol 1,4,5-trisphosphate receptor type 1                                                     | 3  | 4535032   | 4889524   | 354493  |

|               |                                                                              |    |           |           |         |
|---------------|------------------------------------------------------------------------------|----|-----------|-----------|---------|
| <b>ITPR2</b>  | inositol 1,4,5-trisphosphate receptor type 2                                 | 12 | 26490342  | 26986131  | 495790  |
| ITSN2         | intersectin 2                                                                | 2  | 24425733  | 24583583  | 157851  |
| IVD           | isovaleryl-CoA dehydrogenase                                                 | 15 | 40697686  | 40728146  | 30461   |
| IZUMO2        | IZUMO family member 2                                                        | 19 | 50655805  | 50666452  | 10648   |
| JAK1          | Janus kinase 1                                                               | 1  | 65298912  | 65432187  | 133276  |
| JAKMIP1       | janus kinase and microtubule interacting protein 1                           | 4  | 6027926   | 6202318   | 174393  |
| JAKMIP3       | Janus kinase and microtubule interacting protein 3                           | 10 | 133918175 | 133998313 | 80139   |
| JARID2        | jumonji and AT-rich interaction domain containing 2                          | 6  | 15246527  | 15522252  | 275726  |
| JAZF1         | JAZF zinc finger 1                                                           | 7  | 27870192  | 28220362  | 350171  |
| JAZF1-AS1     | JAZF1 antisense RNA 1                                                        | 7  | 28219941  | 28283536  | 63596   |
| JMJD1C        | jumonji domain containing 1C                                                 | 10 | 64926981  | 65225722  | 298742  |
| JPX           | JPX transcript, XIST activator (non-protein coding)                          | X  | 73164159  | 73290243  | 126085  |
| KALRN         | kalirin, RhoGEF kinase                                                       | 3  | 123798870 | 124445172 | 646303  |
| KANK2         | KN motif and ankyrin repeat domains 2                                        | 19 | 11274943  | 11308467  | 33525   |
| KANSL1        | KAT8 regulatory NSL complex subunit 1                                        | 17 | 44107282  | 44302733  | 195452  |
| KANSL3        | KAT8 regulatory NSL complex subunit 3                                        | 2  | 97258907  | 97308524  | 49618   |
| KARS          | lysyl-tRNA synthetase                                                        | 16 | 75661622  | 75682541  | 20920   |
| KAT2B         | lysine acetyltransferase 2B                                                  | 3  | 20081515  | 20195896  | 114382  |
| KAT5          | lysine acetyltransferase 5                                                   | 11 | 65479467  | 65487075  | 7609    |
| KAT6A         | lysine acetyltransferase 6A                                                  | 8  | 41786997  | 41909508  | 122512  |
| KAT6B         | lysine acetyltransferase 6B                                                  | 10 | 76585340  | 76792380  | 207041  |
| KATNAL1       | katanin catalytic subunit A1 like 1                                          | 13 | 30776767  | 30881621  | 104855  |
| KAZN          | kazrin, periplakin interacting protein                                       | 1  | 14925200  | 15444539  | 519340  |
| KBTBD2        | kelch repeat and BTB domain containing 2                                     | 7  | 32907784  | 32933743  | 25960   |
| KBTBD3        | kelch repeat and BTB domain containing 3                                     | 11 | 105921825 | 105948492 | 26668   |
| KCNA1         | potassium voltage-gated channel subfamily A member 1                         | 12 | 5019071   | 5040527   | 21457   |
| KCNAB1        | potassium voltage-gated channel subfamily A member regulatory beta subunit 1 | 3  | 155755490 | 156256545 | 501056  |
| KCNB1         | potassium voltage-gated channel subfamily B member 1                         | 20 | 47980414  | 48099184  | 118771  |
| <b>KCNB2</b>  | potassium voltage-gated channel subfamily B member 2                         | 8  | 73449626  | 73850584  | 400959  |
| KCNC2         | potassium voltage-gated channel subfamily C member 2                         | 12 | 75433857  | 75603648  | 169792  |
| KCNC3         | potassium voltage-gated channel subfamily C member 3                         | 19 | 50815194  | 50836772  | 21579   |
| KCND2         | potassium voltage-gated channel subfamily D member 2                         | 7  | 119913722 | 120390385 | 476664  |
| KCND3         | potassium voltage-gated channel subfamily D member 3                         | 1  | 112313284 | 112531777 | 218494  |
| KCNH1         | potassium voltage-gated channel subfamily H member 1                         | 1  | 210856555 | 211307457 | 450903  |
| KCNH2         | potassium voltage-gated channel subfamily H member 2                         | 7  | 150642049 | 150675403 | 33355   |
| KCNH5         | potassium voltage-gated channel subfamily H member 5                         | 14 | 63173287  | 63568755  | 395469  |
| KCNH7         | potassium voltage-gated channel subfamily H member 7                         | 2  | 163227917 | 163695240 | 467324  |
| KCNH8         | potassium voltage-gated channel subfamily H member 8                         | 3  | 19189946  | 19577138  | 387193  |
| KCNIP1        | potassium voltage-gated channel interacting protein 1                        | 5  | 169780491 | 170163636 | 383146  |
| KCNIP3        | potassium voltage-gated channel interacting protein 3                        | 2  | 95963052  | 96051825  | 88774   |
| <b>KCNIP4</b> | potassium voltage-gated channel interacting protein 4                        | 4  | 20730239  | 21950422  | 1220184 |
| KCNJ10        | potassium voltage-gated channel subfamily J member 10                        | 1  | 160007257 | 160040038 | 32782   |
| KCNJ11        | potassium voltage-gated channel subfamily J member 11                        | 11 | 17407406  | 17410878  | 3473    |
| KCNJ12        | potassium voltage-gated channel subfamily J member 12                        | 17 | 21279509  | 21323179  | 43671   |
| KCNJ5         | potassium voltage-gated channel subfamily J member 5                         | 11 | 128761251 | 128790930 | 29680   |
| KCNJ6         | potassium voltage-gated channel subfamily J member 6                         | 21 | 38979678  | 39288749  | 309072  |
| KCNJ8         | potassium voltage-gated channel subfamily J member 8                         | 12 | 21917889  | 21928515  | 10627   |
| KCNK10        | potassium two pore domain channel subfamily K member 10                      | 14 | 88649113  | 88793251  | 144139  |
| KCNK12        | potassium two pore domain channel subfamily K member 12                      | 2  | 47743720  | 47798078  | 54359   |
| KCNK9         | potassium two pore domain channel subfamily K member 9                       | 8  | 140613081 | 140715299 | 102219  |
| KCNMA1        | potassium calcium-activated channel subfamily M alpha 1                      | 10 | 78629359  | 79398353  | 768995  |
| KCNN1         | potassium calcium-activated channel subfamily N member 1                     | 19 | 18062102  | 18110889  | 48788   |
| KCNN2         | potassium calcium-activated channel subfamily N member 2                     | 5  | 113696642 | 113832337 | 135696  |
| KCNN3         | potassium calcium-activated channel subfamily N member 3                     | 1  | 154669931 | 154842756 | 172826  |
| KCNQ1         | potassium voltage-gated channel subfamily Q member 1                         | 11 | 2465914   | 2870339   | 404426  |
| KCNQ2         | potassium voltage-gated channel subfamily Q member 2                         | 20 | 62037542  | 62103993  | 66452   |
| <b>KCNQ3</b>  | potassium voltage-gated channel subfamily Q member 3                         | 8  | 133133108 | 133493200 | 360093  |
| KCNQ4         | potassium voltage-gated channel subfamily Q member 4                         | 1  | 41249684  | 41306124  | 56441   |
| <b>KCNQ5</b>  | potassium voltage-gated channel subfamily Q member 5                         | 6  | 73331520  | 73908574  | 577055  |
| KCNT1         | potassium sodium-activated channel subfamily T member 1                      | 9  | 138594031 | 138684992 | 90962   |
| KCNT2         | potassium sodium-activated channel subfamily T member 2                      | 1  | 196194909 | 196578355 | 383447  |
| KCNU1         | potassium calcium-activated channel subfamily U member 1                     | 8  | 36641842  | 36793646  | 151805  |
| KCTD1         | potassium channel tetramerization domain containing 1                        | 18 | 24034874  | 24237365  | 202492  |
| KCTD16        | potassium channel tetramerization domain containing 16                       | 5  | 143550396 | 143865249 | 314854  |
| KCTD7         | potassium channel tetramerization domain containing 7                        | 7  | 66093868  | 66276446  | 182579  |
| KCTD8         | potassium channel tetramerization domain containing 8                        | 4  | 44175926  | 44450824  | 274899  |
| KDELR2        | KDEL endoplasmic reticulum protein retention receptor 2                      | 7  | 6485584   | 6523873   | 38290   |
| KDM1B         | lysine demethylase 1B                                                        | 6  | 18155560  | 18224084  | 68525   |
| KDM2A         | lysine demethylase 2A                                                        | 11 | 66886740  | 67025558  | 138819  |
| KDM4C         | lysine demethylase 4C                                                        | 9  | 6720863   | 7175648   | 454786  |
| KDM5B         | lysine demethylase 5B                                                        | 1  | 202696526 | 202778598 | 82073   |
| KDM5C         | lysine demethylase 5C                                                        | X  | 53220503  | 53254604  | 34102   |
| KDM5D         | lysine demethylase 5D                                                        | Y  | 21865751  | 21906825  | 41075   |
| KDM6A         | lysine demethylase 6A                                                        | X  | 44732757  | 44971847  | 239091  |
| <b>KDR</b>    | kinase insert domain receptor                                                | 4  | 55944644  | 55991756  | 47113   |
| KHDRBS2       | KH RNA binding domain containing, signal transduction associated 2           | 6  | 62389865  | 62996132  | 606268  |

|               |                                                                    |    |           |           |        |
|---------------|--------------------------------------------------------------------|----|-----------|-----------|--------|
| KHDRB53       | KH RNA binding domain containing, signal transduction associated 3 | 8  | 136469700 | 136668965 | 199266 |
| KIAA0232      | KIAA0232                                                           | 4  | 6783102   | 6885897   | 102796 |
| KIAA0319      | KIAA0319                                                           | 6  | 24544332  | 24646383  | 102052 |
| KIAA0319L     | KIAA0319 like                                                      | 1  | 35899091  | 36023551  | 124461 |
| KIAA0355      | KIAA0355                                                           | 19 | 34745442  | 34846491  | 101050 |
| KIAA0368      | KIAA0368                                                           | 9  | 114122972 | 114247025 | 124054 |
| KIAA0408      | KIAA0408                                                           | 6  | 127761488 | 127780536 | 19049  |
| KIAA0586      | KIAA0586                                                           | 14 | 58894103  | 59015216  | 121114 |
| KIAA0753      | KIAA0753                                                           | 17 | 6481468   | 6544247   | 62780  |
| KIAA0825      | KIAA0825                                                           | 5  | 93488671  | 93954309  | 465639 |
| KIAA0922      | KIAA0922                                                           | 4  | 154387498 | 154557863 | 170366 |
| KIAA1024      | KIAA1024                                                           | 15 | 79724858  | 79764632  | 39775  |
| KIAA1147      | KIAA1147                                                           | 7  | 141356528 | 141401953 | 45426  |
| KIAA1191      | KIAA1191                                                           | 5  | 175773064 | 175788971 | 15908  |
| KIAA1211      | KIAA1211                                                           | 4  | 57036361  | 57194791  | 158431 |
| KIAA1211L     | KIAA1211 like                                                      | 2  | 99410309  | 99552722  | 142414 |
| KIAA1217      | KIAA1217                                                           | 10 | 23983675  | 24836772  | 853098 |
| KIAA1324L     | KIAA1324 like                                                      | 7  | 86506222  | 86689015  | 182794 |
| KIAA1328      | KIAA1328                                                           | 18 | 34409069  | 34812135  | 403067 |
| KIAA1429      | KIAA1429                                                           | 8  | 95499921  | 95565757  | 65837  |
| KIAA1462      | KIAA1462                                                           | 10 | 30301729  | 30404423  | 102695 |
| KIAA1468      | KIAA1468                                                           | 18 | 59854491  | 59974355  | 119865 |
| KIAA1549      | KIAA1549                                                           | 7  | 138516126 | 138666064 | 149939 |
| KIAA1671      | KIAA1671                                                           | 22 | 25348697  | 25593415  | 244719 |
| KIAA1958      | KIAA1958                                                           | 9  | 115249127 | 115431677 | 182551 |
| KIAA2026      | KIAA2026                                                           | 9  | 5881596   | 6007901   | 126306 |
| KIF11         | kinesin family member 11                                           | 10 | 94353043  | 94415150  | 62108  |
| KIF13A        | kinesin family member 13A                                          | 6  | 17759414  | 17987854  | 228441 |
| KIF13B        | kinesin family member 13B                                          | 8  | 28924796  | 29120641  | 195846 |
| KIF16B        | kinesin family member 16B                                          | 20 | 16252749  | 16554078  | 301330 |
| KIF1A         | kinesin family member 1A                                           | 2  | 241653181 | 241759725 | 106545 |
| KIF1B         | kinesin family member 1B                                           | 1  | 10270863  | 10441661  | 170799 |
| KIF1C         | kinesin family member 1C                                           | 17 | 4901243   | 4931696   | 30454  |
| KIF21B        | kinesin family member 21B                                          | 1  | 200938520 | 200992828 | 54309  |
| KIF25         | kinesin family member 25                                           | 6  | 168396921 | 168445769 | 48849  |
| KIF26B        | kinesin family member 26B                                          | 1  | 245318287 | 245872733 | 554447 |
| KIF27         | kinesin family member 27                                           | 9  | 86451613  | 86536342  | 84730  |
| KIF2A         | kinesin family member 2A                                           | 5  | 61601989  | 61833076  | 231088 |
| KIF3A         | kinesin family member 3A                                           | 5  | 132028320 | 132073330 | 45011  |
| KIF4A         | kinesin family member 4A                                           | X  | 69509879  | 69640682  | 130804 |
| KIF5A         | kinesin family member 5A                                           | 12 | 57943781  | 57980415  | 36635  |
| KIF5C         | kinesin family member 5C                                           | 2  | 149632819 | 149883273 | 250455 |
| KIF6          | kinesin family member 6                                            | 6  | 39297766  | 39693181  | 395416 |
| KIF7          | kinesin family member 7                                            | 15 | 90152020  | 90198682  | 46663  |
| <b>KIFAP3</b> | kinesin associated protein 3                                       | 1  | 169890467 | 170054349 | 163883 |
| KIN           | Kin17 DNA and RNA binding protein                                  | 10 | 7792925   | 7829990   | 37066  |
| KIRREL3       | kin of IRRE like 3 (Drosophila)                                    | 11 | 126293254 | 126873355 | 580102 |
| KLC1          | kinesin light chain 1                                              | 14 | 104028233 | 104167888 | 139656 |
| KLF12         | Kruppel like factor 12                                             | 13 | 74260226  | 74708394  | 448169 |
| KLF5          | Kruppel like factor 5                                              | 13 | 73629114  | 73651676  | 22563  |
| KLF7          | Kruppel like factor 7                                              | 2  | 207938861 | 208031991 | 93131  |
| KLHL1         | kelch like family member 1                                         | 13 | 70274726  | 70682591  | 407866 |
| KLHL13        | kelch like family member 13                                        | X  | 117031776 | 117251303 | 219528 |
| KLHL14        | kelch like family member 14                                        | 18 | 30252634  | 30353025  | 100392 |
| KLHL24        | kelch like family member 24                                        | 3  | 183353356 | 183402265 | 48910  |
| KLHL28        | kelch like family member 28                                        | 14 | 45393522  | 45511525  | 118004 |
| KLHL29        | kelch like family member 29                                        | 2  | 23608088  | 23931481  | 323394 |
| KLHL32        | kelch like family member 32                                        | 6  | 97372605  | 97588630  | 216026 |
| KLHL4         | kelch like family member 4                                         | X  | 86772752  | 86925050  | 152299 |
| KLHL41        | kelch like family member 41                                        | 2  | 170366212 | 170382772 | 16561  |
| KLHL9         | kelch like family member 9                                         | 9  | 21329670  | 21335379  | 5710   |
| KLKB1         | kallikrein B1                                                      | 4  | 187130133 | 187179625 | 49493  |
| KMT2C         | lysine methyltransferase 2C                                        | 7  | 151832010 | 152133090 | 301081 |
| KMT2D         | lysine methyltransferase 2D                                        | 12 | 49412758  | 49453557  | 40800  |
| KNSTRN        | kinetochore localized astrin/SPAG5 binding protein                 | 15 | 40674922  | 40686447  | 11526  |
| KPNA3         | karyopherin subunit alpha 3                                        | 13 | 50273447  | 50367057  | 93611  |
| KRBOX4        | KRAB box domain containing 4                                       | X  | 46306292  | 46356857  | 50566  |
| KRT23         | keratin 23                                                         | 17 | 39078948  | 39093886  | 14939  |
| KRT4          | keratin 4                                                          | 12 | 53200333  | 53208335  | 8003   |
| KRT75         | keratin 75                                                         | 12 | 52817854  | 52828309  | 10456  |
| KRTAP5-AS1    | KRTAP5-1/KRTAP5-2 antisense RNA 1                                  | 11 | 1592583   | 1620414   | 27832  |
| KSR1          | kinase suppressor of ras 1                                         | 17 | 25783670  | 25953461  | 169792 |
| KSR2          | kinase suppressor of ras 2                                         | 12 | 117890817 | 118406788 | 515972 |
| KTN1          | kinectin 1                                                         | 14 | 56025790  | 56168244  | 142455 |
| KY            | kyphoscoliosis peptidase                                           | 3  | 134321980 | 134370478 | 48499  |
| KYNU          | kynureninase                                                       | 2  | 143635067 | 143799890 | 164824 |
| L1CAM         | L1 cell adhesion molecule                                          | X  | 153126969 | 153174677 | 47709  |

|              |                                                                    |    |           |           |        |
|--------------|--------------------------------------------------------------------|----|-----------|-----------|--------|
| L2HGDH       | L-2-hydroxyglutarate dehydrogenase                                 | 14 | 50704281  | 50779266  | 74986  |
| L3MBTL4      | l(3)mbt-like 4 (Drosophila)                                        | 18 | 5954705   | 6415236   | 460532 |
| LAMA2        | laminin subunit alpha 2                                            | 6  | 129204342 | 129837714 | 633373 |
| <b>LAMA3</b> | laminin subunit alpha 3                                            | 18 | 21269407  | 21535030  | 265624 |
| LAMA4        | laminin subunit alpha 4                                            | 6  | 112429963 | 112576141 | 146179 |
| LAMB4        | laminin subunit beta 4                                             | 7  | 107663993 | 107770801 | 106809 |
| LAMC3        | laminin subunit gamma 3                                            | 9  | 133884469 | 133969860 | 85392  |
| LANCL3       | LanC like 3                                                        | X  | 37430822  | 37543716  | 112895 |
| LARP1B       | La ribonucleoprotein domain family member 1B                       | 4  | 128982423 | 129144086 | 161664 |
| LARP4B       | La ribonucleoprotein domain family member 4B                       | 10 | 855484    | 977564    | 122081 |
| LARS2        | leucyl-tRNA synthetase 2, mitochondrial                            | 3  | 45429998  | 45590913  | 160916 |
| LAS1L        | LAS1 like, ribosome biogenesis factor                              | X  | 64732462  | 64754655  | 22194  |
| LCA5L        | LCA5L, lebercilin like                                             | 21 | 40777770  | 40817731  | 39962  |
| LCOR         | ligand dependent nuclear receptor corepressor                      | 10 | 98592017  | 98740800  | 148784 |
| LCORL        | ligand dependent nuclear receptor corepressor like                 | 4  | 17842822  | 18023499  | 180678 |
| LDB2         | LIM domain binding 2                                               | 4  | 16503164  | 16900432  | 397269 |
| LDLR         | low density lipoprotein receptor                                   | 19 | 11200038  | 11244492  | 44455  |
| LDLRAD2      | low density lipoprotein receptor class A domain containing 2       | 1  | 22138758  | 22151714  | 12957  |
| LDLRAD3      | low density lipoprotein receptor class A domain containing 3       | 11 | 35965531  | 36253686  | 288156 |
| LDLRAD4      | low density lipoprotein receptor class A domain containing 4       | 18 | 13217497  | 13652754  | 435258 |
| LDLRAP1      | low density lipoprotein receptor adaptor protein 1                 | 1  | 25870071  | 25895377  | 25307  |
| LEF1         | lymphoid enhancer binding factor 1                                 | 4  | 108968701 | 109090112 | 121412 |
| LEKR1        | leucine, glutamate and lysine rich 1                               | 3  | 156543270 | 156763918 | 220649 |
| LEPR         | leptin receptor                                                    | 1  | 65886248  | 66107242  | 220995 |
| LETMD1       | LETM1 domain containing 1                                          | 12 | 51441745  | 51454207  | 12463  |
| LEUTX        | leucine twenty homeobox                                            | 19 | 40267235  | 40276775  | 9541   |
| LGALS3       | galectin 3                                                         | 14 | 55590828  | 55612126  | 21299  |
| LGALS1       | galectin like                                                      | 2  | 64681103  | 64688515  | 7413   |
| LGMN         | legumain                                                           | 14 | 93170152  | 93215047  | 44896  |
| LGR4         | leucine rich repeat containing G protein-coupled receptor 4        | 11 | 27387508  | 27494322  | 106815 |
| LGR6         | leucine rich repeat containing G protein-coupled receptor 6        | 1  | 202163029 | 202288909 | 125881 |
| LGSN         | lengsin, lens protein with glutamine synthetase domain             | 6  | 63985856  | 64029882  | 44027  |
| <b>LHFP</b>  | lipoma HMGIC fusion partner                                        | 13 | 39917029  | 40177665  | 260637 |
| LHFPL2       | lipoma HMGIC fusion partner-like 2                                 | 5  | 77781038  | 78065844  | 284807 |
| LHFPL3       | lipoma HMGIC fusion partner-like 3                                 | 7  | 103969104 | 104549001 | 579898 |
| LHPP         | phospholysine phosphohistidine inorganic pyrophosphate phosphatase | 10 | 126150403 | 126306457 | 156055 |
| <b>LIF</b>   | LIF, interleukin 6 family cytokine                                 | 22 | 30636436  | 30642840  | 6405   |
| LIG4         | DNA ligase 4                                                       | 13 | 108859787 | 108870716 | 10930  |
| LIMCH1       | LIM and calponin homology domains 1                                | 4  | 41361624  | 41702061  | 340438 |
| LIMS1        | LIM zinc finger domain containing 1                                | 2  | 109150857 | 109303702 | 152846 |
| LIMS2        | LIM zinc finger domain containing 2                                | 2  | 128395956 | 128439360 | 43405  |
| LIN52        | lin-52 DREAM MuvB core complex component                           | 14 | 74551499  | 74667936  | 116438 |
| LIN54        | lin-54 DREAM MuvB core complex component                           | 4  | 83831126  | 83934079  | 102954 |
| LIN7A        | lin-7 homolog A, crumbs cell polarity complex component            | 12 | 81186299  | 81331704  | 145406 |
| LIN9         | lin-9 DREAM MuvB core complex component                            | 1  | 226418850 | 226497570 | 78721  |
| LINC00158    | long intergenic non-protein coding RNA 158                         | 21 | 26758133  | 26804013  | 45881  |
| LINC00189    | long intergenic non-protein coding RNA 189                         | 21 | 30565801  | 30660526  | 94726  |
| LINC00210    | long intergenic non-protein coding RNA 210                         | 1  | 218066242 | 218094146 | 27905  |
| LINC00271    | long intergenic non-protein coding RNA 271                         | 6  | 135818489 | 136037193 | 218705 |
| LINC00301    | long intergenic non-protein coding RNA 301                         | 11 | 60383209  | 60454622  | 71414  |
| LINC00305    | long intergenic non-protein coding RNA 305                         | 18 | 61747243  | 61816264  | 69022  |
| LINC00333    | long intergenic non-protein coding RNA 333                         | 13 | 85136499  | 85137371  | 873    |
| LINC00375    | long intergenic non-protein coding RNA 375                         | 13 | 85639222  | 85653055  | 13834  |
| LINC00376    | long intergenic non-protein coding RNA 376                         | 13 | 63757234  | 63801189  | 43956  |
| LINC00379    | long intergenic non-protein coding RNA 379                         | 13 | 91779867  | 91783661  | 3795   |
| LINC00381    | long intergenic non-protein coding RNA 381                         | 13 | 74993310  | 75009296  | 15987  |
| LINC00382    | long intergenic non-protein coding RNA 382                         | 13 | 80446721  | 80492079  | 45359  |
| LINC00395    | long intergenic non-protein coding RNA 395                         | 13 | 64241814  | 64312151  | 70338  |
| LINC00400    | long intergenic non-protein coding RNA 400                         | 13 | 43732767  | 43733602  | 836    |
| LINC00403    | long intergenic non-protein coding RNA 403                         | 13 | 112761433 | 112762329 | 897    |
| LINC00448    | long intergenic non-protein coding RNA 448                         | 13 | 63246418  | 63306492  | 60075  |
| LINC00457    | long intergenic non-protein coding RNA 457                         | 13 | 35009587  | 35214822  | 205236 |
| LINC00466    | long intergenic non-protein coding RNA 466                         | 1  | 63655660  | 63782902  | 127243 |
| LINC00494    | long intergenic non-protein coding RNA 494                         | 20 | 46988693  | 46999372  | 10680  |
| LINC00499    | long intergenic non-protein coding RNA 499                         | 4  | 139230865 | 139345498 | 114634 |
| LINC00504    | long intergenic non-protein coding RNA 504                         | 4  | 14472089  | 14889793  | 417705 |
| LINC00508    | long intergenic non-protein coding RNA 508                         | 12 | 128425140 | 128434705 | 9566   |
| LINC00535    | long intergenic non-protein coding RNA 535                         | 8  | 94225531  | 94712661  | 487131 |
| LINC00536    | long intergenic non-protein coding RNA 536                         | 8  | 116962736 | 117337297 | 374562 |
| LINC00598    | long intergenic non-protein coding RNA 598                         | 13 | 41025131  | 41055143  | 30013  |
| LINC00607    | long intergenic non-protein coding RNA 607                         | 2  | 216476286 | 216708445 | 232160 |
| LINC00616    | long intergenic non-protein coding RNA 616                         | 4  | 138948576 | 139051863 | 103288 |
| LINC00620    | long intergenic non-protein coding RNA 620                         | 3  | 13692196  | 13788132  | 95937  |
| LINC00630    | long intergenic non-protein coding RNA 630                         | X  | 102024089 | 102140334 | 116246 |
| LINC00639    | long intergenic non-protein coding RNA 639                         | 14 | 39218545  | 39417477  | 198933 |
| LINC00648    | long intergenic non-protein coding RNA 648                         | 14 | 48234157  | 48264295  | 30139  |



|           |                                                                                   |    |           |           |         |
|-----------|-----------------------------------------------------------------------------------|----|-----------|-----------|---------|
| LINC00866 | long intergenic non-protein coding RNA 866                                        | 10 | 99588235  | 99609555  | 21321   |
| LINC00871 | long intergenic non-protein coding RNA 871                                        | 14 | 46410146  | 46971026  | 560881  |
| LINC00877 | long intergenic non-protein coding RNA 877                                        | 3  | 72084451  | 72291716  | 207266  |
| LINC00882 | long intergenic non-protein coding RNA 882                                        | 3  | 106555658 | 106959488 | 403831  |
| LINC00894 | long intergenic non-protein coding RNA 894                                        | X  | 149106846 | 149392815 | 285970  |
| LINC00907 | long intergenic non-protein coding RNA 907                                        | 18 | 39739247  | 40271387  | 532141  |
| LINC00910 | long intergenic non-protein coding RNA 910                                        | 17 | 41447213  | 41466567  | 19355   |
| LINC00922 | long intergenic non-protein coding RNA 922                                        | 16 | 65318402  | 65610203  | 291802  |
| LINC00955 | long intergenic non-protein coding RNA 955                                        | 4  | 3578596   | 3592438   | 13843   |
| LINC00959 | long intergenic non-protein coding RNA 959                                        | 10 | 131864638 | 131909081 | 44444   |
| LINC00971 | long intergenic non-protein coding RNA 971                                        | 3  | 84687557  | 84930830  | 243274  |
| LINC00989 | long intergenic non-protein coding RNA 989                                        | 4  | 80413570  | 80497614  | 84045   |
| LINC00992 | long intergenic non-protein coding RNA 992                                        | 5  | 116751205 | 116881993 | 130789  |
| LINC00993 | long intergenic non-protein coding RNA 993                                        | 10 | 37598113  | 37635959  | 37847   |
| LINC01016 | long intergenic non-protein coding RNA 1016                                       | 6  | 33835283  | 33864691  | 29409   |
| LINC01021 | long intergenic non-protein coding RNA 1021                                       | 5  | 27472399  | 27496508  | 24110   |
| LINC01036 | long intergenic non-protein coding RNA 1036                                       | 1  | 187061974 | 187329455 | 267482  |
| LINC01060 | long intergenic non-protein coding RNA 1060                                       | 4  | 189321890 | 189602205 | 280316  |
| LINC01087 | long intergenic non-protein coding RNA 1087                                       | 2  | 132394598 | 132407188 | 12591   |
| LINC01088 | long intergenic non-protein coding RNA 1088                                       | 4  | 79892902  | 80229952  | 337051  |
| LINC01091 | long intergenic non-protein coding RNA 1091                                       | 4  | 124571422 | 124851561 | 280140  |
| LINC01098 | long intergenic non-protein coding RNA 1098                                       | 4  | 178649911 | 178911904 | 261994  |
| LINC01122 | long intergenic non-protein coding RNA 1122                                       | 2  | 58654934  | 59290901  | 635968  |
| LINC01135 | long intergenic non-protein coding RNA 1135                                       | 1  | 59250823  | 59365384  | 114562  |
| LINC01170 | long intergenic non-protein coding RNA 1170                                       | 5  | 123641923 | 123740772 | 98850   |
| LINC01284 | long intergenic non-protein coding RNA 1284                                       | X  | 50844121  | 50844465  | 345     |
| LINC01411 | long intergenic non-protein coding RNA 1411                                       | 5  | 173953231 | 173954142 | 912     |
| LINC01568 | long intergenic non-protein coding RNA 1568                                       | 16 | 73420704  | 73455295  | 34592   |
| LINC01572 | long intergenic non-protein coding RNA 1572                                       | 16 | 72302913  | 72324506  | 21594   |
| LINC01605 | long intergenic non-protein coding RNA 1605                                       | 8  | 37263982  | 37279087  | 15106   |
| LINC-PINT | long intergenic non-protein coding RNA, p53 induced transcript                    | 7  | 130626519 | 130794935 | 168417  |
| LINGO1    | leucine rich repeat and Ig domain containing 1                                    | 15 | 77905369  | 78113242  | 207874  |
| LINGO2    | leucine rich repeat and Ig domain containing 2                                    | 9  | 27948076  | 28670283  | 722208  |
| LIPA      | lipase A, lysosomal acid type                                                     | 10 | 90973326  | 91174314  | 200989  |
| LIPC      | lipase C, hepatic type                                                            | 15 | 58702768  | 58861151  | 158384  |
| LIPE-AS1  | LIPE antisense RNA 1                                                              | 19 | 42901280  | 43156507  | 255228  |
| LIPJ      | lipase family member J                                                            | 10 | 90346510  | 90366733  | 20224   |
| LIPM      | lipase family member M                                                            | 10 | 90562487  | 90580303  | 17817   |
| LITAF     | lipopolysaccharide induced TNF factor                                             | 16 | 11641853  | 11730237  | 88385   |
| LMBRD2    | LMBR1 domain containing 2                                                         | 5  | 36098514  | 36152063  | 53550   |
| LMCD1     | LIM and cysteine rich domains 1                                                   | 3  | 8543393   | 8609805   | 66413   |
| LMCD1-AS1 | LMCD1 antisense RNA 1 (head to head)                                              | 3  | 7994492   | 8653610   | 659119  |
| LMF1      | lipase maturation factor 1                                                        | 16 | 903634    | 1031318   | 127685  |
| LMNA      | lamin A/C                                                                         | 1  | 156052364 | 156109880 | 57517   |
| LMNB1     | lamin B1                                                                          | 5  | 126112315 | 126172712 | 60398   |
| LMO2      | LIM domain only 2                                                                 | 11 | 33880122  | 33913836  | 33715   |
| LMO7      | LIM domain 7                                                                      | 13 | 76194570  | 76434004  | 239435  |
| LMTK2     | lemur tyrosine kinase 2                                                           | 7  | 97736197  | 97838945  | 102749  |
| LMX1A     | LIM homeobox transcription factor 1 alpha                                         | 1  | 165171104 | 165325952 | 154849  |
| LMX1B     | LIM homeobox transcription factor 1 beta                                          | 9  | 129376722 | 129463311 | 86590   |
| LNX1-AS2  | LNX1 antisense RNA 2                                                              | 4  | 54459123  | 54470214  | 11092   |
| LNX2      | ligand of numb-protein X 2                                                        | 13 | 28120050  | 28194541  | 74492   |
| LONRF2    | LON peptidase N-terminal domain and ring finger 2                                 | 2  | 100889753 | 100939195 | 49443   |
| LOX       | lysyl oxidase                                                                     | 5  | 121398890 | 121413980 | 15091   |
| LOXHD1    | lipoxygenase homology domains 1                                                   | 18 | 44056935  | 44236996  | 180062  |
| LPA       | lipoprotein(a)                                                                    | 6  | 160952515 | 161087407 | 134893  |
| LPAR5     | lysophosphatidic acid receptor 5                                                  | 12 | 6728001   | 6745613   | 17613   |
| LPCAT4    | lysophosphatidylcholine acyltransferase 4                                         | 15 | 34651106  | 34659479  | 8374    |
| LPIN2     | lipin 2                                                                           | 18 | 2916992   | 3013313   | 96322   |
| LPL       | lipoprotein lipase                                                                | 8  | 19759228  | 19824769  | 65542   |
| LPP       | LIM domain containing preferred translocation partner in lipoma                   | 3  | 187871072 | 188608460 | 737389  |
| LPXN      | leupaxin                                                                          | 11 | 58294344  | 58345693  | 51350   |
| LRAT      | lecithin retinol acyltransferase (phosphatidylcholine--retinol O-acyltransferase) | 4  | 155548097 | 155674270 | 126174  |
| LRBA      | LPS responsive beige-like anchor protein                                          | 4  | 151185594 | 151936879 | 751286  |
| LRCH1     | leucine rich repeats and calponin homology domain containing 1                    | 13 | 47127303  | 47327175  | 199873  |
| LRCH2     | leucine rich repeats and calponin homology domain containing 2                    | X  | 114345185 | 114468635 | 123451  |
| LRFN5     | leucine rich repeat and fibronectin type III domain containing 5                  | 14 | 42076773  | 42373752  | 296980  |
| LRIG1     | leucine rich repeats and immunoglobulin like domains 1                            | 3  | 66429221  | 66551687  | 122467  |
| LRMP      | lymphoid restricted membrane protein                                              | 12 | 25173936  | 25261268  | 87333   |
| LRP1      | LDL receptor related protein 1                                                    | 12 | 57522276  | 57607134  | 84859   |
| LRP12     | LDL receptor related protein 12                                                   | 8  | 105501459 | 105601252 | 99794   |
| LRP1B     | LDL receptor related protein 1B                                                   | 2  | 140988992 | 142889270 | 1900279 |
| LRP2      | LDL receptor related protein 2                                                    | 2  | 169983619 | 170219195 | 235577  |
| LRP6      | LDL receptor related protein 6                                                    | 12 | 12268959  | 12419946  | 150988  |
| LRP8      | LDL receptor related protein 8                                                    | 1  | 53711217  | 53793742  | 82526   |
| LRPAP1    | LDL receptor related protein associated protein 1                                 | 4  | 3508103   | 3534286   | 26184   |

|           |                                                                      |    |           |           |         |
|-----------|----------------------------------------------------------------------|----|-----------|-----------|---------|
| LRRC1     | leucine rich repeat containing 1                                     | 6  | 53659295  | 53788919  | 129625  |
| LRRC37B   | leucine rich repeat containing 37B                                   | 17 | 30334891  | 30380523  | 45633   |
| LRRC37BP1 | leucine rich repeat containing 37B pseudogene 1                      | 17 | 28956698  | 28964482  | 7785    |
| LRRC4C    | leucine rich repeat containing 4C                                    | 11 | 40135753  | 41481323  | 1345571 |
| LRRC69    | leucine rich repeat containing 69                                    | 8  | 92114060  | 92231464  | 117405  |
| LRRC7     | leucine rich repeat containing 7                                     | 1  | 70034081  | 70617628  | 583548  |
| LRRFIP1   | LRR binding FLII interacting protein 1                               | 2  | 238536219 | 238722325 | 186107  |
| LRRFIP2   | LRR binding FLII interacting protein 2                               | 3  | 37094117  | 37225180  | 131064  |
| LRRIQ1    | leucine rich repeats and IQ motif containing 1                       | 12 | 85430092  | 85657002  | 226911  |
| LRRIQ3    | leucine rich repeats and IQ motif containing 3                       | 1  | 74491699  | 74663871  | 172173  |
| LRRK1     | leucine rich repeat kinase 1                                         | 15 | 101459420 | 101610317 | 150898  |
| LRRK2     | leucine rich repeat kinase 2                                         | 12 | 40590546  | 40763087  | 172542  |
| LRRTM4    | leucine rich repeat transmembrane neuronal 4                         | 2  | 76974845  | 77820445  | 845601  |
| LRSAM1    | leucine rich repeat and sterile alpha motif containing 1             | 9  | 130213765 | 130265780 | 52016   |
| LRTOMT    | leucine rich transmembrane and O-methyltransferase domain containing | 11 | 71791382  | 71821828  | 30447   |
| LRWD1     | leucine rich repeats and WD repeat domain containing 1               | 7  | 102105376 | 102113615 | 8240    |
| LSAMP     | limbic system-associated membrane protein                            | 3  | 115521235 | 117716095 | 2194861 |
| LSM10     | LSM10, U7 small nuclear RNA associated                               | 1  | 36856839  | 36863493  | 6655    |
| LSM14B    | LSM family member 14B                                                | 20 | 60697517  | 60710434  | 12918   |
| LTA       | lymphotoxin alpha                                                    | 6  | 31539831  | 31542101  | 2271    |
| LTA4H     | leukotriene A4 hydrolase                                             | 12 | 96394606  | 96437298  | 42693   |
| LTBP1     | latent transforming growth factor beta binding protein 1             | 2  | 33172039  | 33624576  | 452538  |
| LTBR      | lymphotoxin beta receptor                                            | 12 | 6484211   | 6500733   | 16523   |
| LUC7L2    | LUC7 like 2, pre-mRNA splicing factor                                | 7  | 139026106 | 139107345 | 81240   |
| LUM       | lumican                                                              | 12 | 91496406  | 91505608  | 9203    |
| LUZP2     | leucine zipper protein 2                                             | 11 | 24518516  | 25104150  | 585635  |
| LY86      | lymphocyte antigen 86                                                | 6  | 6588341   | 6655216   | 66876   |
| LYAR      | Ly1 antibody reactive                                                | 4  | 4269428   | 4291896   | 22469   |
| LYN       | LYN proto-oncogene, Src family tyrosine kinase                       | 8  | 56792372  | 56923940  | 131569  |
| LYPD5     | LY6/PLAUR domain containing 5                                        | 19 | 44300081  | 44331358  | 31278   |
| LYPD6B    | LY6/PLAUR domain containing 6B                                       | 2  | 149894621 | 150071776 | 177156  |
| LYST      | lysosomal trafficking regulator                                      | 1  | 235824341 | 236046940 | 222600  |
| M6PR      | mannose-6-phosphate receptor, cation dependent                       | 12 | 9092959   | 9102551   | 9593    |
| MACF1     | microtubule-actin crosslinking factor 1                              | 1  | 39546988  | 39952849  | 405862  |
| MACROD2   | MACRO domain containing 2                                            | 20 | 13976015  | 16033842  | 2057828 |
| MAD1L1    | MAD1 mitotic arrest deficient like 1                                 | 7  | 1855429   | 2272878   | 417450  |
| MAGEA11   | MAGE family member A11                                               | X  | 148769894 | 148798926 | 29033   |
| MAGI1     | membrane associated guanylate kinase, WW and PDZ domain containing 1 | 3  | 65339200  | 66024509  | 685310  |
| MAGI2     | membrane associated guanylate kinase, WW and PDZ domain containing 2 | 7  | 77646393  | 79082890  | 1436498 |
| MAGI3     | membrane associated guanylate kinase, WW and PDZ domain containing 3 | 1  | 113933371 | 114228545 | 295175  |
| MAGT1     | magnesium transporter 1                                              | X  | 77081861  | 77151090  | 69230   |
| MAK       | male germ cell associated kinase                                     | 6  | 10762956  | 10838764  | 75809   |
| MALRD1    | MAM and LDL receptor class A domain containing 1                     | 10 | 19492779  | 20079330  | 586552  |
| MAMDC2    | MAM domain containing 2                                              | 9  | 72658497  | 72841886  | 183390  |
| MAML2     | mastermind like transcriptional coactivator 2                        | 11 | 95709762  | 96076344  | 366583  |
| MAML3     | mastermind like transcriptional coactivator 3                        | 4  | 140637907 | 141075338 | 437432  |
| MAN1A1    | mannosidase alpha class 1A member 1                                  | 6  | 119498374 | 119670926 | 172553  |
| MAN1A2    | mannosidase alpha class 1A member 2                                  | 1  | 117910071 | 118071494 | 161424  |
| MAN1B1    | mannosidase alpha class 1B member 1                                  | 9  | 139981379 | 140003635 | 22257   |
| MAN1C1    | mannosidase alpha class 1C member 1                                  | 1  | 25943959  | 26112698  | 168740  |
| MAOA      | monoamine oxidase A                                                  | X  | 43515467  | 43606068  | 90602   |
| MAOB      | monoamine oxidase B                                                  | X  | 43625858  | 43741693  | 115836  |
| MAP1LC3B2 | microtubule associated protein 1 light chain 3 beta 2                | 12 | 116997186 | 117014425 | 17240   |
| MAP2      | microtubule associated protein 2                                     | 2  | 210288782 | 210598842 | 310061  |
| MAP2K1    | mitogen-activated protein kinase kinase 1                            | 15 | 66679155  | 66784650  | 105496  |
| MAP2K5    | mitogen-activated protein kinase kinase 5                            | 15 | 67835047  | 68099461  | 264415  |
| MAP2K6    | mitogen-activated protein kinase kinase 6                            | 17 | 67410839  | 67539472  | 128634  |
| MAP2K7    | mitogen-activated protein kinase kinase 7                            | 19 | 7968728   | 7979363   | 10636   |
| MAP3K13   | mitogen-activated protein kinase kinase kinase 13                    | 3  | 185000729 | 185206885 | 206157  |
| MAP3K14   | mitogen-activated protein kinase kinase kinase 14                    | 17 | 43340488  | 43394414  | 53927   |
| MAP3K19   | mitogen-activated protein kinase kinase kinase 19                    | 2  | 135722061 | 135805038 | 82978   |
| MAP3K5    | mitogen-activated protein kinase kinase kinase 5                     | 6  | 136878185 | 137113656 | 235472  |
| MAP3K7    | mitogen-activated protein kinase kinase kinase 7                     | 6  | 91223292  | 91296764  | 73473   |
| MAP3K9    | mitogen-activated protein kinase kinase kinase 9                     | 14 | 71189243  | 71276251  | 87009   |
| MAP4K3    | mitogen-activated protein kinase kinase kinase kinase 3              | 2  | 39476407  | 39664453  | 188047  |
| MAP4K4    | mitogen-activated protein kinase kinase kinase kinase 4              | 2  | 102313312 | 102511149 | 197838  |
| MAP4K5    | mitogen-activated protein kinase kinase kinase kinase 5              | 14 | 50885219  | 51027844  | 142626  |
| MAP6      | microtubule associated protein 6                                     | 11 | 75297963  | 75380165  | 82203   |
| MAP7      | microtubule associated protein 7                                     | 6  | 136663875 | 136871957 | 208083  |
| MAP7D2    | MAP7 domain containing 2                                             | X  | 20024831  | 20135035  | 110205  |
| MAPK1     | mitogen-activated protein kinase 1                                   | 22 | 22108789  | 22221970  | 113182  |
| MAPK10    | mitogen-activated protein kinase 10                                  | 4  | 86936276  | 87515284  | 579009  |
| MAPK4     | mitogen-activated protein kinase 4                                   | 18 | 48086448  | 48258194  | 171747  |

|               |                                                                     |    |           |           |        |
|---------------|---------------------------------------------------------------------|----|-----------|-----------|--------|
| MAPK8IP1      | mitogen-activated protein kinase 8 interacting protein 1            | 11 | 45907202  | 45928016  | 20815  |
| MAPK9         | mitogen-activated protein kinase 9                                  | 5  | 179660143 | 179719099 | 58957  |
| MAPKAP1       | mitogen-activated protein kinase associated protein 1               | 9  | 128199672 | 128469513 | 269842 |
| MAPKAPK5      | mitogen-activated protein kinase-activated protein kinase 5         | 12 | 112279782 | 112334343 | 54562  |
| MAPRE1        | microtubule associated protein RP/EB family member 1                | 20 | 31407699  | 31438211  | 30513  |
| MAPRE2        | microtubule associated protein RP/EB family member 2                | 18 | 32556892  | 32723434  | 166543 |
| <b>MAPT</b>   | microtubule associated protein tau                                  | 17 | 43971748  | 44105700  | 133953 |
| MAPT-AS1      | MAPT antisense RNA 1                                                | 17 | 43921017  | 43972966  | 51950  |
| MARK1         | microtubule affinity regulating kinase 1                            | 1  | 220701568 | 220837803 | 136236 |
| MARK2         | microtubule affinity regulating kinase 2                            | 11 | 63606400  | 63678491  | 72092  |
| MARK3         | microtubule affinity regulating kinase 3                            | 14 | 103851729 | 103970168 | 118440 |
| MARS2         | methionyl-tRNA synthetase 2, mitochondrial                          | 2  | 198570087 | 198573113 | 3027   |
| MARVELD2      | MARVEL domain containing 2                                          | 5  | 68710939  | 68740157  | 29219  |
| MAST2         | microtubule associated serine/threonine kinase 2                    | 1  | 46252659  | 46501796  | 249138 |
| MAST4         | microtubule associated serine/threonine kinase family member 4      | 5  | 65892176  | 66465423  | 573248 |
| MAT2A         | methionine adenosyltransferase 2A                                   | 2  | 85766288  | 85772403  | 6116   |
| <b>MATR3</b>  | matrin 3                                                            | 5  | 138609441 | 138667360 | 57920  |
| MAX           | MYC associated factor X                                             | 14 | 65472892  | 65569413  | 96522  |
| MB21D2        | Mab-21 domain containing 2                                          | 3  | 192514604 | 192635950 | 121347 |
| MBD5          | methyl-CpG binding domain protein 5                                 | 2  | 148778580 | 149275805 | 497226 |
| MBL2          | mannose binding lectin 2                                            | 10 | 54525140  | 54531460  | 6321   |
| MBNL1         | muscleblind like splicing regulator 1                               | 3  | 151961617 | 152183569 | 221953 |
| MBNL2         | muscleblind like splicing regulator 2                               | 13 | 97873688  | 98046374  | 172687 |
| MBNL3         | muscleblind like splicing regulator 3                               | X  | 131503345 | 131623996 | 120652 |
| MBOAT2        | membrane bound O-acyltransferase domain containing 2                | 2  | 8992820   | 9143942   | 151123 |
| MBTPS2        | membrane bound transcription factor peptidase, site 2               | X  | 21857754  | 21903542  | 45789  |
| MC1R          | melanocortin 1 receptor                                             | 16 | 89978527  | 89987385  | 8859   |
| MCC           | mutated in colorectal cancers                                       | 5  | 112357796 | 112824527 | 466732 |
| MCCC1         | methylcrotonoyl-CoA carboxylase 1                                   | 3  | 182733006 | 182833863 | 100858 |
| MCF2          | MCF.2 cell line derived transforming sequence                       | X  | 138663929 | 138790386 | 126458 |
| MCF2L2        | MCF.2 cell line derived transforming sequence-like 2                | 3  | 182895831 | 183146566 | 250736 |
| MCFD2         | multiple coagulation factor deficiency 2                            | 2  | 47129009  | 47168994  | 39986  |
| MCHR2         | melanin concentrating hormone receptor 2                            | 6  | 100367786 | 100442123 | 74338  |
| MCL1          | MCL1, BCL2 family apoptosis regulator                               | 1  | 150547032 | 150552066 | 5035   |
| MCM2          | minichromosome maintenance complex component 2                      | 3  | 127317066 | 127341276 | 24211  |
| MCM4          | minichromosome maintenance complex component 4                      | 8  | 48872745  | 48890720  | 17976  |
| MCM5          | minichromosome maintenance complex component 5                      | 22 | 35796056  | 35821423  | 25368  |
| MCM6          | minichromosome maintenance complex component 6                      | 2  | 136597196 | 136633996 | 36801  |
| MCM7          | minichromosome maintenance complex component 7                      | 7  | 99690351  | 99699563  | 9213   |
| MCM8          | minichromosome maintenance 8 homologous recombination repair factor | 20 | 5931298   | 5975852   | 44555  |
| MCM9          | minichromosome maintenance 9 homologous recombination repair factor | 6  | 119134605 | 119256327 | 121723 |
| MCOLN2        | mucolipin 2                                                         | 1  | 85391268  | 85462796  | 71529  |
| MCTP1         | multiple C2 and transmembrane domain containing 1                   | 5  | 94039446  | 94620279  | 580834 |
| MCTP2         | multiple C2 and transmembrane domain containing 2                   | 15 | 94774767  | 95023632  | 248866 |
| MDGA2         | MAM domain containing glycosylphosphatidylinositol anchor 2         | 14 | 47308826  | 48144157  | 835332 |
| ME1           | malic enzyme 1                                                      | 6  | 83920108  | 84140797  | 220690 |
| ME3           | malic enzyme 3                                                      | 11 | 86152150  | 86383678  | 231529 |
| MECOM         | MDS1 and EVI1 complex locus                                         | 3  | 168801287 | 169381406 | 580120 |
| MECP2         | methyl-CpG binding protein 2                                        | X  | 153287024 | 153363212 | 76189  |
| MED12L        | mediator complex subunit 12 like                                    | 3  | 150803484 | 151154860 | 351377 |
| MED13         | mediator complex subunit 13                                         | 17 | 60019966  | 60142643  | 122678 |
| <b>MED13L</b> | mediator complex subunit 13 like                                    | 12 | 116395711 | 116715143 | 319433 |
| MED14         | mediator complex subunit 14                                         | X  | 40507558  | 40595110  | 87553  |
| MED26         | mediator complex subunit 26                                         | 19 | 16685718  | 16739873  | 54156  |
| MED27         | mediator complex subunit 27                                         | 9  | 134735494 | 134955295 | 219802 |
| MED30         | mediator complex subunit 30                                         | 8  | 118532952 | 118552501 | 19550  |
| MED8          | mediator complex subunit 8                                          | 1  | 43849588  | 43855479  | 5892   |
| MEF2A         | myocyte enhancer factor 2A                                          | 15 | 100017370 | 100256671 | 239302 |
| MEF2C         | myocyte enhancer factor 2C                                          | 5  | 88013975  | 88199922  | 185948 |
| MEFV          | MEFV, pyrin innate immunity regulator                               | 16 | 3292028   | 3306627   | 14600  |
| MEGF10        | multiple EGF like domains 10                                        | 5  | 126626523 | 126801429 | 174907 |
| MEGF11        | multiple EGF like domains 11                                        | 15 | 66187417  | 66546085  | 358669 |
| MEGF9         | multiple EGF like domains 9                                         | 9  | 123363091 | 123476748 | 113658 |
| MEI4          | meiotic double-stranded break formation protein 4                   | 6  | 78400375  | 78636691  | 236317 |
| MEMO1         | mediator of cell motility 1                                         | 2  | 32090129  | 32236299  | 146171 |
| MERTK         | MER proto-oncogene, tyrosine kinase                                 | 2  | 112656056 | 112787138 | 131083 |
| MESDC2        | mesoderm development candidate 2                                    | 15 | 81239667  | 81282219  | 42553  |
| MEST          | mesoderm specific transcript                                        | 7  | 130126012 | 130146133 | 20122  |
| METAP1D       | methionyl aminopeptidase type 1D, mitochondrial                     | 2  | 172864490 | 172947158 | 82669  |
| METTL15       | methyltransferase like 15                                           | 11 | 28129795  | 28355054  | 225260 |
| METTL16       | methyltransferase like 16                                           | 17 | 2308856   | 2415185   | 106330 |
| METTL21EP     | methyltransferase like 21E, pseudogene                              | 13 | 103532449 | 103548383 | 15935  |
| METTL9        | methyltransferase like 9                                            | 16 | 21608539  | 21668794  | 60256  |
| MFAP3L        | microfibrillar associated protein 3 like                            | 4  | 170907748 | 170954182 | 46435  |
| MFN2          | mitofusin 2                                                         | 1  | 12040238  | 12073571  | 33334  |

|            |                                                                                        |    |           |           |        |
|------------|----------------------------------------------------------------------------------------|----|-----------|-----------|--------|
| MFSD11     | major facilitator superfamily domain containing 11                                     | 17 | 74731947  | 74777531  | 45585  |
| MGA        | MGA, MAX dimerization protein                                                          | 15 | 41913422  | 42062141  | 148720 |
| MGAT1      | mannosyl (alpha-1,3-)-glycoprotein beta-1,2-N-acetylglucosaminyltransferase            | 5  | 180217541 | 180242652 | 25112  |
| MGAT4A     | mannosyl (alpha-1,3-)-glycoprotein beta-1,4-N-acetylglucosaminyltransferase, isozyme A | 2  | 99235569  | 99347589  | 112021 |
| MGAT4B     | mannosyl (alpha-1,3-)-glycoprotein beta-1,4-N-acetylglucosaminyltransferase, isozyme B | 5  | 179224597 | 179233952 | 9356   |
| MGAT4C     | MGAT4 family member C                                                                  | 12 | 86372516  | 87232681  | 860166 |
| MGLL       | monoglyceride lipase                                                                   | 3  | 127407909 | 127542051 | 134143 |
| MGME1      | mitochondrial genome maintenance exonuclease 1                                         | 20 | 17949556  | 17971765  | 22210  |
| MGMT       | O-6-methylguanine-DNA methyltransferase                                                | 10 | 131265448 | 131566271 | 300824 |
| MGST2      | microsomal glutathione S-transferase 2                                                 | 4  | 140586922 | 140661899 | 74978  |
| MIA3       | MIA family member 3, ER export factor                                                  | 1  | 222791428 | 222841354 | 49927  |
| MIB1       | mindbomb E3 ubiquitin protein ligase 1                                                 | 18 | 19284918  | 19450918  | 166001 |
| MICB       | MHC class I polypeptide-related sequence B                                             | 6  | 31462658  | 31478901  | 16244  |
| MICU1      | mitochondrial calcium uptake 1                                                         | 10 | 74127098  | 74385899  | 258802 |
| MICU2      | mitochondrial calcium uptake 2                                                         | 13 | 22066836  | 22178353  | 111518 |
| MICU3      | mitochondrial calcium uptake family member 3                                           | 8  | 16884747  | 16980153  | 95407  |
| MID1       | midline 1                                                                              | X  | 10413350  | 10851773  | 438424 |
| MIEF1      | mitochondrial elongation factor 1                                                      | 22 | 39895437  | 39914137  | 18701  |
| MIEN1      | migration and invasion enhancer 1                                                      | 17 | 37884749  | 37887040  | 2292   |
| MIER3      | MIER family member 3                                                                   | 5  | 56215429  | 56267502  | 52074  |
| MIPEP      | mitochondrial intermediate peptidase                                                   | 13 | 24304328  | 24463558  | 159231 |
| MIPOL1     | mirror-image polydactyly 1                                                             | 14 | 37667118  | 38021566  | 354449 |
| MIR1-1HG   | MIR1-1 host gene                                                                       | 20 | 61147660  | 61167971  | 20312  |
| MIR1268A   | microRNA 1268a                                                                         | 15 | 22513229  | 22513280  | 52     |
| MIR137HG   | MIR137 host gene                                                                       | 1  | 98453556  | 98515419  | 61864  |
| MIR181A1HG | MIR181A1 host gene                                                                     | 1  | 198776622 | 198906558 | 129937 |
| MIR3134    | microRNA 3134                                                                          | 3  | 15738805  | 15738878  | 74     |
| MIR31HG    | MIR31 host gene                                                                        | 9  | 21455641  | 21559668  | 104028 |
| MIR5009    | microRNA 5009                                                                          | 15 | 90427163  | 90427262  | 100    |
| MIR5096    | microRNA 5096                                                                          | 4  | 79741906  | 79741975  | 70     |
| MIR548AE2  | microRNA 548ae-2                                                                       | 5  | 57825870  | 57825936  | 67     |
| MIR548AI   | microRNA 548ai                                                                         | 6  | 99572485  | 99572572  | 88     |
| MIR548AJ2  | microRNA 548aj-2                                                                       | X  | 37883148  | 37883239  | 92     |
| MIR548F1   | microRNA 548f-1                                                                        | 10 | 56367634  | 56367717  | 84     |
| MIR548F3   | microRNA 548f-3                                                                        | 5  | 109849530 | 109849616 | 87     |
| MIR548F5   | microRNA 548f-5                                                                        | X  | 32659591  | 32659676  | 86     |
| MIR548G    | microRNA 548g                                                                          | 4  | 148265781 | 148265869 | 89     |
| MIR548H3   | microRNA 548h-3                                                                        | 17 | 13446846  | 13446963  | 118    |
| MIR548H4   | microRNA 548h-4                                                                        | 8  | 26906370  | 26906480  | 111    |
| MIR548N    | microRNA 548n                                                                          | 7  | 34980372  | 34980446  | 75     |
| MIR548W    | microRNA 548w                                                                          | 16 | 26036558  | 26036631  | 74     |
| MIR5684    | microRNA 5684                                                                          | 19 | 12897942  | 12898006  | 65     |
| MIR5694    | microRNA 5694                                                                          | 14 | 67908572  | 67908647  | 76     |
| MITF       | melanogenesis associated transcription factor                                          | 3  | 69788586  | 70017488  | 228903 |
| MKL1       | megakaryoblastic leukemia (translocation) 1                                            | 22 | 40806285  | 41032706  | 226422 |
| MKLN1      | muskelin 1                                                                             | 7  | 130794855 | 131181395 | 386541 |
| MKNK1      | MAP kinase interacting serine/threonine kinase 1                                       | 1  | 47023090  | 47082515  | 59426  |
| MLC1       | megalencephalic leukoencephalopathy with subcortical cysts 1                           | 22 | 50497820  | 50524331  | 26512  |
| MLIP       | muscular LMNA interacting protein                                                      | 6  | 53794780  | 54131078  | 336299 |
| MLLT3      | MLLT3, super elongation complex subunit                                                | 9  | 20341663  | 20622542  | 280880 |
| MLLT6      | MLLT6, PHD finger domain containing                                                    | 17 | 36861795  | 36886056  | 24262  |
| MME        | membrane metalloendopeptidase                                                          | 3  | 154741913 | 154901497 | 159585 |
| MME11      | membrane metalloendopeptidase like 1                                                   | 1  | 2522078   | 2564481   | 42404  |
| MMP16      | matrix metallopeptidase 16                                                             | 8  | 89044237  | 89340254  | 296018 |
| MMP2       | matrix metallopeptidase 2                                                              | 16 | 55423612  | 55540603  | 116992 |
| MMP20      | matrix metallopeptidase 20                                                             | 11 | 102447566 | 102496063 | 48498  |
| MMP24      | matrix metallopeptidase 24                                                             | 20 | 33814457  | 33864801  | 50345  |
| MMP3       | matrix metallopeptidase 3                                                              | 11 | 102706532 | 102714534 | 8003   |
| MMP9       | matrix metallopeptidase 9                                                              | 20 | 44637547  | 44645200  | 7654   |
| MMRN1      | multimerin 1                                                                           | 4  | 90800683  | 90875780  | 75098  |
| MOB3B      | MOB kinase activator 3B                                                                | 9  | 27325207  | 27529779  | 204573 |
| MOBP       | myelin-associated oligodendrocyte basic protein                                        | 3  | 39508689  | 39570970  | 62282  |
| MOCS1      | molybdenum cofactor synthesis 1                                                        | 6  | 39867354  | 39902290  | 34937  |
| MOCS2      | molybdenum cofactor synthesis 2                                                        | 5  | 52391509  | 52405893  | 14385  |
| MOG        | myelin oligodendrocyte glycoprotein                                                    | 6  | 29624758  | 29640149  | 15392  |
| MON2       | MON2 homolog, regulator of endosome-to-Golgi trafficking                               | 12 | 62860597  | 62991363  | 130767 |
| MORC1      | MORC family CW-type zinc finger 1                                                      | 3  | 108677086 | 108836989 | 159904 |
| MORC2      | MORC family CW-type zinc finger 2                                                      | 22 | 31321117  | 31364284  | 43168  |
| MORN1      | MORN repeat containing 1                                                               | 1  | 2252692   | 2323146   | 70455  |
| MOV10L1    | Mov10 RISC complex RNA helicase like 1                                                 | 22 | 50528308  | 50600119  | 71812  |
| MOXD1      | monooxygenase DBH like 1                                                               | 6  | 132617194 | 132722684 | 105491 |
| MPDZ       | multiple PDZ domain crumbs cell polarity complex component                             | 9  | 13105703  | 13279589  | 173887 |
| MPO        | myeloperoxidase                                                                        | 17 | 56347217  | 56358296  | 11080  |
| MPP4       | membrane palmitoylated protein 4                                                       | 2  | 202509593 | 202563417 | 53825  |

|                |                                                                  |    |           |           |         |
|----------------|------------------------------------------------------------------|----|-----------|-----------|---------|
| MPRIP          | myosin phosphatase Rho interacting protein                       | 17 | 16945859  | 17120993  | 175135  |
| MPZ            | myelin protein zero                                              | 1  | 161274525 | 161279762 | 5238    |
| MRAP2          | melanocortin 2 receptor accessory protein 2                      | 6  | 84743475  | 84800600  | 57126   |
| MRAS           | muscle RAS oncogene homolog                                      | 3  | 138066539 | 138124375 | 57837   |
| MRC1           | mannose receptor C-type 1                                        | 10 | 18098352  | 18200091  | 101740  |
| MROH1          | maestro heat like repeat family member 1                         | 8  | 145202919 | 145316843 | 113925  |
| MROH5          | maestro heat like repeat family member 5                         | 8  | 142443929 | 142517330 | 73402   |
| MROH7-TTC4     | MROH7-TTC4 readthrough (NMD candidate)                           | 1  | 55107459  | 55207981  | 100523  |
| MRPL3          | mitochondrial ribosomal protein L3                               | 3  | 131181056 | 131221827 | 40772   |
| MRPL48         | mitochondrial ribosomal protein L48                              | 11 | 73498361  | 73576178  | 77818   |
| MRPS12         | mitochondrial ribosomal protein S12                              | 19 | 39421188  | 39423802  | 2615    |
| MRPS25         | mitochondrial ribosomal protein S25                              | 3  | 15083967  | 15106842  | 22876   |
| MRPS27         | mitochondrial ribosomal protein S27                              | 5  | 71515236  | 71616473  | 101238  |
| MRPS5          | mitochondrial ribosomal protein S5                               | 2  | 95752952  | 95815179  | 62228   |
| MRV1-AS1       | MRV1 antisense RNA 1                                             | 11 | 10562819  | 10621479  | 58661   |
| MSANTD3-TMEFF1 | MSANTD3-TMEFF1 readthrough                                       | 9  | 103204553 | 103339918 | 135366  |
| MSH3           | mutS homolog 3                                                   | 5  | 79950467  | 80172279  | 221813  |
| MSH6           | mutS homolog 6                                                   | 2  | 47922669  | 48037240  | 114572  |
| MSI2           | musashi RNA binding protein 2                                    | 17 | 55333212  | 55762046  | 428835  |
| MSR1           | macrophage scavenger receptor 1                                  | 8  | 15965387  | 16424999  | 459613  |
| MSRA           | methionine sulfoxide reductase A                                 | 8  | 9911778   | 10286401  | 374624  |
| MSRB3          | methionine sulfoxide reductase B3                                | 12 | 65672423  | 65882024  | 209602  |
| MTA3           | metastasis associated 1 family member 3                          | 2  | 42721709  | 42984087  | 262379  |
| MTAP           | methylthioadenosine phosphorylase                                | 9  | 21802542  | 21931646  | 129105  |
| MTBP           | MDM2 binding protein                                             | 8  | 121457640 | 121554373 | 96734   |
| MTDH           | metadherin                                                       | 8  | 98656407  | 98740998  | 84592   |
| MTF1           | metal regulatory transcription factor 1                          | 1  | 38275239  | 38325292  | 50054   |
| MTHFD1L        | methylenetetrahydrofolate dehydrogenase (NADP+ dependent) 1-like | 6  | 151186685 | 151423023 | 236339  |
| MTHFD2L        | methylenetetrahydrofolate dehydrogenase (NADP+ dependent) 2-like | 4  | 74979891  | 75168816  | 188926  |
| MTHFR          | methylenetetrahydrofolate reductase                              | 1  | 11845780  | 11866977  | 21198   |
| MTHFS          | methenyltetrahydrofolate synthetase                              | 15 | 80125927  | 80189721  | 63795   |
| MTIF3          | mitochondrial translational initiation factor 3                  | 13 | 28009776  | 28024739  | 14964   |
| MTM1           | myotubularin 1                                                   | X  | 149737069 | 149841795 | 104727  |
| MTMR12         | myotubularin related protein 12                                  | 5  | 32227100  | 32313115  | 86016   |
| MTMR2          | myotubularin related protein 2                                   | 11 | 95566046  | 95658479  | 92434   |
| MTMR6          | myotubularin related protein 6                                   | 13 | 25802307  | 25862147  | 59841   |
| MTMR7          | myotubularin related protein 7                                   | 8  | 17155539  | 17271037  | 115499  |
| MTOR           | mechanistic target of rapamycin                                  | 1  | 11166592  | 11322564  | 155973  |
| MTR            | 5-methyltetrahydrofolate-homocysteine methyltransferase          | 1  | 236958610 | 237067281 | 108672  |
| MTURN          | maturin, neural progenitor differentiation regulator homolog     | 7  | 30174426  | 30202378  | 27953   |
| MTUS1          | microtubule associated scaffold protein 1                        | 8  | 17501304  | 17658426  | 157123  |
| MTUS2          | microtubule associated scaffold protein 2                        | 13 | 29598748  | 30077892  | 479145  |
| MTX2           | metaxin 2                                                        | 2  | 177134123 | 177202753 | 68631   |
| MUC12          | mucin 12, cell surface associated                                | 7  | 100612904 | 100662230 | 49327   |
| MUC19          | mucin 19, oligomeric                                             | 12 | 40787197  | 40964632  | 177436  |
| MUC4           | mucin 4, cell surface associated                                 | 3  | 195473636 | 195539148 | 65513   |
| MUSK           | muscle associated receptor tyrosine kinase                       | 9  | 113431051 | 113563859 | 132809  |
| MVB12B         | multivesicular body subunit 12B                                  | 9  | 129089128 | 129269320 | 180193  |
| MXD1           | MAX dimerization protein 1                                       | 2  | 70124820  | 70170077  | 45258   |
| MYCBP2         | MYC binding protein 2, E3 ubiquitin protein ligase               | 13 | 77618792  | 77901185  | 282394  |
| MYH10          | myosin heavy chain 10                                            | 17 | 8377523   | 8534079   | 156557  |
| MYH13          | myosin heavy chain 13                                            | 17 | 10201401  | 10276447  | 75047   |
| MYH14          | myosin heavy chain 14                                            | 19 | 50691443  | 50813802  | 122360  |
| MYH15          | myosin heavy chain 15                                            | 3  | 108099216 | 108248169 | 148954  |
| MYH7B          | myosin heavy chain 7B                                            | 20 | 33563206  | 33590240  | 27035   |
| MYLK           | myosin light chain kinase                                        | 3  | 123328896 | 123603178 | 274283  |
| MYLK3          | myosin light chain kinase 3                                      | 16 | 46740891  | 46824319  | 83429   |
| MYO10          | myosin X                                                         | 5  | 16665395  | 16936372  | 270978  |
| MYO16          | myosin XVI                                                       | 13 | 109248500 | 109860355 | 611856  |
| MYO18B         | myosin XVIIIIB                                                   | 22 | 26138111  | 26427007  | 288897  |
| MYO1B          | myosin IB                                                        | 2  | 192109911 | 192290115 | 180205  |
| MYO1D          | myosin ID                                                        | 17 | 30819540  | 31204195  | 384656  |
| MYO3A          | myosin IIIA                                                      | 10 | 26223196  | 26501456  | 278261  |
| MYO3B          | myosin IIIB                                                      | 2  | 171034655 | 171511681 | 477027  |
| MYO5B          | myosin VB                                                        | 18 | 47349183  | 47721463  | 372281  |
| MYO6           | myosin VI                                                        | 6  | 76458909  | 76629254  | 170346  |
| MYO9A          | myosin IXA                                                       | 15 | 72114632  | 72410918  | 296287  |
| MYOCD          | myocardin                                                        | 17 | 12569207  | 12672266  | 103060  |
| MYOM1          | myomesin 1                                                       | 18 | 3066805   | 3220106   | 153302  |
| MYOT           | myotilin                                                         | 5  | 137203480 | 137223540 | 20061   |
| MYOZ3          | myozenin 3                                                       | 5  | 150040436 | 150058927 | 18492   |
| MYRIP          | myosin VIIA and Rab interacting protein                          | 3  | 39850405  | 40301812  | 451408  |
| MYT1L          | myelin transcription factor 1 like                               | 2  | 1792885   | 2335032   | 542148  |
| N4BP2L1        | NEDD4 binding protein 2 like 1                                   | 13 | 32974861  | 33002315  | 27455   |
| NAA15          | N(alpha)-acetyltransferase 15, NatA auxiliary subunit            | 4  | 140222609 | 140341187 | 118579  |
| NAALADL2       | N-acetylated alpha-linked acidic dipeptidase like 2              | 3  | 174156363 | 175523428 | 1367066 |
| NADK2          | NAD kinase 2, mitochondrial                                      | 5  | 36192694  | 36242381  | 49688   |

|               |                                                                                                     |    |           |           |        |
|---------------|-----------------------------------------------------------------------------------------------------|----|-----------|-----------|--------|
| NAE1          | NEDD8 activating enzyme E1 subunit 1                                                                | 16 | 66836778  | 66907159  | 70382  |
| NAF1          | nuclear assembly factor 1 ribonucleoprotein                                                         | 4  | 164031225 | 164088073 | 56849  |
| <b>NAIP</b>   | NLR family apoptosis inhibitory protein                                                             | 5  | 70264310  | 70320941  | 56632  |
| NALCN         | sodium leak channel, non-selective                                                                  | 13 | 101706130 | 102068843 | 362714 |
| NALCN-AS1     | NALCN antisense RNA 1                                                                               | 13 | 101360579 | 101711638 | 351060 |
| NAP1L4        | nucleosome assembly protein 1 like 4                                                                | 11 | 2965667   | 3013607   | 47941  |
| NAP1L6        | nucleosome assembly protein 1 like 6                                                                | X  | 72345876  | 72347919  | 2044   |
| NARF          | nuclear prelamin A recognition factor                                                               | 17 | 80416056  | 80448413  | 32358  |
| NARS2         | asparaginyl-tRNA synthetase 2, mitochondrial (putative)                                             | 11 | 78147007  | 78285919  | 138913 |
| NAT1          | N-acetyltransferase 1                                                                               | 8  | 18027986  | 18081198  | 53213  |
| <b>NAT2</b>   | N-acetyltransferase 2                                                                               | 8  | 18248755  | 18258728  | 9974   |
| NAV1          | neuron navigator 1                                                                                  | 1  | 201592411 | 201796102 | 203692 |
| NAV2          | neuron navigator 2                                                                                  | 11 | 19372271  | 20143144  | 770874 |
| NAV3          | neuron navigator 3                                                                                  | 12 | 78224685  | 78606790  | 382106 |
| NBAS          | neuroblastoma amplified sequence                                                                    | 2  | 15307032  | 15701454  | 394423 |
| NBEA          | neurobeachin                                                                                        | 13 | 35516424  | 36247159  | 730736 |
| NBN           | nibrin                                                                                              | 8  | 90945564  | 91015456  | 69893  |
| NBPF20        | NBPF member 20                                                                                      | 1  | 148250249 | 148347506 | 97258  |
| NBPF8         | NBPF member 8                                                                                       | 1  | 144146808 | 144224481 | 77674  |
| NCALD         | neurocalcin delta                                                                                   | 8  | 102698771 | 103137135 | 438365 |
| NCAM1         | neural cell adhesion molecule 1                                                                     | 11 | 112831997 | 113149158 | 317162 |
| NCAM2         | neural cell adhesion molecule 2                                                                     | 21 | 22370633  | 22915650  | 545018 |
| NCAPD2        | non-SMC condensin I complex subunit D2                                                              | 12 | 6602522   | 6641121   | 38600  |
| NCAPD3        | non-SMC condensin II complex subunit D3                                                             | 11 | 134020014 | 134095348 | 75335  |
| NCAPG2        | non-SMC condensin II complex subunit G2                                                             | 7  | 158424003 | 158497520 | 73518  |
| NCEH1         | neutral cholesterol ester hydrolase 1                                                               | 3  | 172348039 | 172429008 | 80970  |
| NCK2          | NCK adaptor protein 2                                                                               | 2  | 106361354 | 106510730 | 149377 |
| NCKAP1L       | NCK associated protein 1 like                                                                       | 12 | 54891495  | 54937726  | 46232  |
| NCKAP5        | NCK associated protein 5                                                                            | 2  | 133429374 | 134326034 | 896661 |
| NCOA1         | nuclear receptor coactivator 1                                                                      | 2  | 24714783  | 24993571  | 278789 |
| NCOA2         | nuclear receptor coactivator 2                                                                      | 8  | 71021997  | 71316040  | 294044 |
| NCOA3         | nuclear receptor coactivator 3                                                                      | 20 | 46130601  | 46285621  | 155021 |
| <b>NCOA7</b>  | nuclear receptor coactivator 7                                                                      | 6  | 126102307 | 126252266 | 149960 |
| NCOR2         | nuclear receptor corepressor 2                                                                      | 12 | 124808961 | 125052135 | 243175 |
| NCSTN         | nicastatin                                                                                          | 1  | 160313062 | 160328742 | 15681  |
| NDC1          | NDC1 transmembrane nucleoporin                                                                      | 1  | 54231133  | 54304533  | 73401  |
| NDRG1         | N-myc downstream regulated 1                                                                        | 8  | 134249414 | 134314265 | 64852  |
| NDRG3         | NDRG family member 3                                                                                | 20 | 35280169  | 35374481  | 94313  |
| NDST3         | N-deacetylase and N-sulfotransferase 3                                                              | 4  | 118954773 | 119179803 | 225031 |
| NDST4         | N-deacetylase and N-sulfotransferase 4                                                              | 4  | 115748919 | 116035032 | 286114 |
| NDUFA1        | NADH:ubiquinone oxidoreductase subunit A1                                                           | X  | 119005450 | 119010625 | 5176   |
| NDUFA10       | NADH:ubiquinone oxidoreductase subunit A10                                                          | 2  | 240831867 | 240964819 | 132953 |
| NDUFA5        | NADH:ubiquinone oxidoreductase subunit A5                                                           | 7  | 123177051 | 123198309 | 21259  |
| NDUFA6        | NADH:ubiquinone oxidoreductase subunit A6                                                           | 22 | 42481529  | 42486959  | 5431   |
| NDUFA8        | NADH:ubiquinone oxidoreductase subunit A8                                                           | 9  | 124894745 | 124922098 | 27354  |
| NDUFAF1       | NADH:ubiquinone oxidoreductase complex assembly factor 1                                            | 15 | 41679551  | 41694717  | 15167  |
| NDUFB5        | NADH:ubiquinone oxidoreductase subunit B5                                                           | 3  | 179322478 | 179345435 | 22958  |
| NDUFB7        | NADH:ubiquinone oxidoreductase subunit B7                                                           | 19 | 14676890  | 14682874  | 5985   |
| NDUFB8        | NADH:ubiquinone oxidoreductase subunit B8                                                           | 10 | 102265385 | 102289638 | 24254  |
| NDUFC2-KCTD14 | NDUFC2-KCTD14 readthrough                                                                           | 11 | 77728017  | 77790911  | 62895  |
| NDUFS1        | NADH:ubiquinone oxidoreductase core subunit S1                                                      | 2  | 206979541 | 207024327 | 44787  |
| NDUFS4        | NADH:ubiquinone oxidoreductase subunit S4                                                           | 5  | 52856463  | 52979168  | 122706 |
| NDUFS7        | NADH:ubiquinone oxidoreductase core subunit S7                                                      | 19 | 1383526   | 1395583   | 12058  |
| NDUFS8        | NADH:ubiquinone oxidoreductase core subunit S8                                                      | 11 | 67798084  | 67804111  | 6028   |
| NDUFV2        | NADH:ubiquinone oxidoreductase core subunit V2                                                      | 18 | 9102628   | 9134343   | 31716  |
| NEB           | nebulin                                                                                             | 2  | 152341850 | 152591001 | 249152 |
| NEBL          | nebullette                                                                                          | 10 | 21068902  | 21463116  | 394215 |
| NEDD4         | neural precursor cell expressed, developmentally down-regulated 4, E3 ubiquitin protein ligase      | 15 | 56119120  | 56285944  | 166825 |
| NEDD4L        | neural precursor cell expressed, developmentally down-regulated 4-like, E3 ubiquitin protein ligase | 18 | 55711599  | 56068772  | 357174 |
| NEDD9         | neural precursor cell expressed, developmentally down-regulated 9                                   | 6  | 11183531  | 11382581  | 199051 |
| <b>NEFH</b>   | neurofilament heavy                                                                                 | 22 | 29876219  | 29887379  | 11161  |
| NEFL          | neurofilament light                                                                                 | 8  | 24808468  | 24814624  | 6157   |
| NEGR1         | neuronal growth regulator 1                                                                         | 1  | 71861623  | 72748417  | 886795 |
| NEIL3         | nei like DNA glycosylase 3                                                                          | 4  | 178230990 | 178284097 | 53108  |
| <b>NEK1</b>   | NIMA related kinase 1                                                                               | 4  | 170314426 | 170533780 | 219355 |
| <b>NEK11</b>  | NIMA related kinase 11                                                                              | 3  | 130745694 | 131069309 | 323616 |
| NEK3          | NIMA related kinase 3                                                                               | 13 | 52706775  | 52733996  | 27222  |
| NEK5          | NIMA related kinase 5                                                                               | 13 | 52611093  | 52703214  | 92122  |
| NEK7          | NIMA related kinase 7                                                                               | 1  | 198126093 | 198291550 | 165458 |
| NELFE         | negative elongation factor complex member E                                                         | 6  | 31919864  | 31926887  | 7024   |
| NELL1         | neural EGFL like 1                                                                                  | 11 | 20691117  | 21597227  | 906111 |
| NELL2         | neural EGFL like 2                                                                                  | 12 | 44902058  | 45315631  | 413574 |
| NEO1          | neogenin 1                                                                                          | 15 | 73344051  | 73597547  | 253497 |
| <b>NETO1</b>  | neuropilin and tolloid like 1                                                                       | 18 | 70409549  | 70535381  | 125833 |
| NF1           | neurofibromin 1                                                                                     | 17 | 29421945  | 29709134  | 287190 |

|              |                                                          |    |           |           |         |
|--------------|----------------------------------------------------------|----|-----------|-----------|---------|
| NF2          | neurofibromin 2                                          | 22 | 29999545  | 30094587  | 95043   |
| NFAT5        | nuclear factor of activated T-cells 5                    | 16 | 69598997  | 69738569  | 139573  |
| NFATC3       | nuclear factor of activated T-cells 3                    | 16 | 68118654  | 68263162  | 144509  |
| NFE2L1       | nuclear factor, erythroid 2 like 1                       | 17 | 46125691  | 46138849  | 13159   |
| NFE2L2       | nuclear factor, erythroid 2 like 2                       | 2  | 178092323 | 178257425 | 165103  |
| NFIA         | nuclear factor I A                                       | 1  | 61330931  | 61928465  | 597535  |
| NFIB         | nuclear factor I B                                       | 9  | 14081842  | 14398982  | 317141  |
| NFIC         | nuclear factor I C                                       | 19 | 3359561   | 3469215   | 109655  |
| NFKB1        | nuclear factor kappa B subunit 1                         | 4  | 103422486 | 103538459 | 115974  |
| NFS1         | NFS1, cysteine desulfurase                               | 20 | 34255977  | 34287281  | 31305   |
| NGB          | neuroglobin                                              | 14 | 77731826  | 77737655  | 5830    |
| NGEF         | neuronal guanine nucleotide exchange factor              | 2  | 233743396 | 233877982 | 134587  |
| NGF          | nerve growth factor                                      | 1  | 115828539 | 115880857 | 52319   |
| NGFR         | nerve growth factor receptor                             | 17 | 47572655  | 47592379  | 19725   |
| NHEJ1        | non-homologous end joining factor 1                      | 2  | 219940039 | 220025587 | 85549   |
| NHLRC1       | NHL repeat containing E3 ubiquitin protein ligase 1      | 6  | 18120718  | 18122851  | 2134    |
| NHS          | NHS actin remodeling regulator                           | X  | 17393543  | 17754114  | 360572  |
| NHSL1        | NHS like 1                                               | 6  | 138743180 | 139013708 | 270529  |
| NHSL2        | NHS like 2                                               | X  | 71130938  | 71363424  | 232487  |
| NID2         | nidogen 2                                                | 14 | 52471521  | 52535712  | 64192   |
| NIN          | ninein                                                   | 14 | 51186481  | 51297839  | 111359  |
| NINJ2        | ninjurin 2                                               | 12 | 673462    | 772945    | 99484   |
| NINL         | ninein like                                              | 20 | 25433341  | 25566153  | 132813  |
| NIP7         | NIP7, nucleolar pre-rRNA processing protein              | 16 | 69373333  | 69377014  | 3682    |
| <b>NIPA1</b> | non imprinted in Prader-Willi/Angelman syndrome 1        | 15 | 23043277  | 23100005  | 56729   |
| NIPA2        | non imprinted in Prader-Willi/Angelman syndrome 2        | 15 | 23004684  | 23034427  | 29744   |
| NIPSNAP1     | nipsnap homolog 1                                        | 22 | 29950797  | 29977326  | 26530   |
| NIT1         | nitrilase 1                                              | 1  | 161087876 | 161095235 | 7360    |
| NKAIN2       | sodium/potassium transporting ATPase interacting 2       | 6  | 124125286 | 125146803 | 1021518 |
| NKAIN3       | sodium/potassium transporting ATPase interacting 3       | 8  | 63161150  | 63912211  | 751062  |
| NKAPP1       | NFKB activating protein pseudogene 1                     | X  | 119254863 | 119379122 | 124260  |
| NKD1         | naked cuticle homolog 1                                  | 16 | 50582241  | 50670647  | 88407   |
| NKIRAS1      | NFKB inhibitor interacting Ras like 1                    | 3  | 23933151  | 23988082  | 54932   |
| NLGN1        | neuroligin 1                                             | 3  | 173114074 | 174004434 | 890361  |
| NLGN4Y       | neuroligin 4, Y-linked                                   | Y  | 16634518  | 16957530  | 323013  |
| NLRP11       | NLR family pyrin domain containing 11                    | 19 | 56296770  | 56348166  | 51397   |
| NLRP2        | NLR family pyrin domain containing 2                     | 19 | 55464498  | 55512510  | 48013   |
| <b>NLRP4</b> | NLR family pyrin domain containing 4                     | 19 | 56347944  | 56393220  | 45277   |
| NME7         | NME/NM23 family member 7                                 | 1  | 169101769 | 169337205 | 235437  |
| NMNAT2       | nicotinamide nucleotide adenyltransferase 2              | 1  | 183217372 | 183387737 | 170366  |
| NMRAL1       | NmrA like redox sensor 1                                 | 16 | 4511681   | 4545764   | 34084   |
| NMRK1        | nicotinamide riboside kinase 1                           | 9  | 77675489  | 77703133  | 27645   |
| NMT1         | N-myristoyltransferase 1                                 | 17 | 43128978  | 43186384  | 57407   |
| NMU          | neuromedin U                                             | 4  | 56461396  | 56502865  | 41470   |
| NOC2L        | NOC2 like nucleolar associated transcriptional repressor | 1  | 879584    | 894689    | 15106   |
| NOD2         | nucleotide binding oligomerization domain containing 2   | 16 | 50727514  | 50766988  | 39475   |
| NOL10        | nucleolar protein 10                                     | 2  | 10710892  | 10830101  | 119210  |
| NOL4         | nucleolar protein 4                                      | 18 | 31431064  | 31804916  | 373853  |
| NOL9         | nucleolar protein 9                                      | 1  | 6581407   | 6614595   | 33189   |
| NOP14        | NOP14 nucleolar protein                                  | 4  | 2939660   | 2965112   | 25453   |
| NOP56        | NOP56 ribonucleoprotein                                  | 20 | 2632791   | 2639039   | 6249    |
| NOS1         | nitric oxide synthase 1                                  | 12 | 117645947 | 117889975 | 244029  |
| NOS1AP       | nitric oxide synthase 1 adaptor protein                  | 1  | 162039564 | 162353321 | 313758  |
| NOS2         | nitric oxide synthase 2                                  | 17 | 26083792  | 26127525  | 43734   |
| NOS3         | nitric oxide synthase 3                                  | 7  | 150688083 | 150711676 | 23594   |
| NOTCH2       | notch 2                                                  | 1  | 120454176 | 120612240 | 158065  |
| NOTCH3       | notch 3                                                  | 19 | 15270444  | 15311792  | 41349   |
| NOTCH4       | notch 4                                                  | 6  | 32162620  | 32191844  | 29225   |
| NOVA1        | NOVA alternative splicing regulator 1                    | 14 | 26912299  | 27066960  | 154662  |
| NOX4         | NADPH oxidase 4                                          | 11 | 89057524  | 89322779  | 265256  |
| NOXRED1      | NADP dependent oxidoreductase domain containing 1        | 14 | 77860364  | 77889860  | 29497   |
| NPAS2        | neuronal PAS domain protein 2                            | 2  | 101436614 | 101613291 | 176678  |
| NPAS3        | neuronal PAS domain protein 3                            | 14 | 33404139  | 34273382  | 869244  |
| NPC2         | NPC intracellular cholesterol transporter 2              | 14 | 74942895  | 74960880  | 17986   |
| NPHP1        | nephrocystin 1                                           | 2  | 110879888 | 110962643 | 82756   |
| NPHP4        | nephrocystin 4                                           | 1  | 5922871   | 6052533   | 129663  |
| NPLOC4       | NPL4 homolog, ubiquitin recognition factor               | 17 | 79523913  | 79615495  | 91583   |
| NPRL3        | NPR3 like, GATOR1 complex subunit                        | 16 | 134273    | 188859    | 54587   |
| NPSR1-AS1    | NPSR1 antisense RNA 1                                    | 7  | 34386124  | 34911194  | 525071  |
| NPY          | neuropeptide Y                                           | 7  | 24323782  | 24331484  | 7703    |
| NQO1         | NAD(P)H quinone dehydrogenase 1                          | 16 | 69740899  | 69760854  | 19956   |
| NQO2         | N-ribosylidihyronicotinamide:quinone reductase 2         | 6  | 2988221   | 3019996   | 31776   |
| NR1H2        | nuclear receptor subfamily 1 group H member 2            | 19 | 50832910  | 50886239  | 53330   |
| NR1H4        | nuclear receptor subfamily 1 group H member 4            | 12 | 100867486 | 100958191 | 90706   |
| NR2F1-AS1    | NR2F1 antisense RNA 1                                    | 5  | 92745065  | 92921354  | 176290  |
| NR2F2-AS1    | NR2F2 antisense RNA 1                                    | 15 | 96670598  | 96870590  | 199993  |
| NR3C1        | nuclear receptor subfamily 3 group C member 1            | 5  | 142657496 | 142815077 | 157582  |

|               |                                                                      |    |           |           |         |
|---------------|----------------------------------------------------------------------|----|-----------|-----------|---------|
| NR3C2         | nuclear receptor subfamily 3 group C member 2                        | 4  | 148999913 | 149365850 | 365938  |
| NR4A2         | nuclear receptor subfamily 4 group A member 2                        | 2  | 157180944 | 157198860 | 17917   |
| NR4A3         | nuclear receptor subfamily 4 group A member 3                        | 9  | 102584137 | 102629173 | 45037   |
| NRS5A2        | nuclear receptor subfamily 5 group A member 2                        | 1  | 199996730 | 200146552 | 149823  |
| NR6A1         | nuclear receptor subfamily 6 group A member 1                        | 9  | 127279554 | 127533589 | 254036  |
| NRCAM         | neuronal cell adhesion molecule                                      | 7  | 107788068 | 108097161 | 309094  |
| NRG1          | neuregulin 1                                                         | 8  | 31496902  | 32622548  | 1125647 |
| NRG2          | neuregulin 2                                                         | 5  | 139226364 | 139422884 | 196521  |
| NRG3          | neuregulin 3                                                         | 10 | 83635070  | 84746935  | 1111866 |
| NRP2          | neuropilin 2                                                         | 2  | 206546714 | 206662857 | 116144  |
| NRXN1         | neurexin 1                                                           | 2  | 50145643  | 51259674  | 1114032 |
| NRXN3         | neurexin 3                                                           | 14 | 78708734  | 80330762  | 1622029 |
| NSD1          | nuclear receptor binding SET domain protein 1                        | 5  | 176560026 | 176727216 | 167191  |
| NSF           | N-ethylmaleimide sensitive factor, vesicle fusing ATPase             | 17 | 44668035  | 44834830  | 166796  |
| NSL1          | NSL1, MIS12 kinetochore complex component                            | 1  | 212899495 | 212965124 | 65630   |
| NSMCE2        | NSE2/MMS21 homolog, SMC5-SMC6 complex SUMO ligase                    | 8  | 126103921 | 126379362 | 275442  |
| NSUN4         | NOP2/Sun RNA methyltransferase family member 4                       | 1  | 46805849  | 46830824  | 24976   |
| <b>NT5C1A</b> | 5'-nucleotidase, cytosolic IA                                        | 1  | 40124793  | 40137710  | 12918   |
| NT5C2         | 5'-nucleotidase, cytosolic II                                        | 10 | 104845940 | 104953056 | 107117  |
| NT5C3B        | 5'-nucleotidase, cytosolic IIIB                                      | 17 | 39981335  | 39992523  | 11189   |
| NT5DC1        | 5'-nucleotidase domain containing 1                                  | 6  | 116422012 | 116570660 | 148649  |
| NT5E          | 5'-nucleotidase ecto                                                 | 6  | 86159809  | 86205500  | 45692   |
| NT5M          | 5',3'-nucleotidase, mitochondrial                                    | 17 | 17206649  | 17250977  | 44329   |
| NTF3          | neurotrophin 3                                                       | 12 | 5541278   | 5630702   | 89425   |
| NTM           | neurotrimin                                                          | 11 | 131240373 | 132206716 | 966344  |
| NTN1          | netrin 1                                                             | 17 | 8924859   | 9147317   | 222459  |
| NTN4          | netrin 4                                                             | 12 | 96051583  | 96184930  | 133348  |
| <b>NTNG1</b>  | netrin G1                                                            | 1  | 107682629 | 108026080 | 343452  |
| NTNG2         | netrin G2                                                            | 9  | 135037334 | 135119921 | 82588   |
| NTRK1         | neurotrophic receptor tyrosine kinase 1                              | 1  | 156785432 | 156851642 | 66211   |
| NTRK2         | neurotrophic receptor tyrosine kinase 2                              | 9  | 87283466  | 87638505  | 355040  |
| NTRK3         | neurotrophic receptor tyrosine kinase 3                              | 15 | 88418230  | 88799999  | 381770  |
| NTS           | neurotensin                                                          | 12 | 86268073  | 86276770  | 8698    |
| NUAK1         | NUAK family kinase 1                                                 | 12 | 106457118 | 106533811 | 76694   |
| NUBPL         | nucleotide binding protein like                                      | 14 | 31959162  | 32330430  | 371269  |
| NUCKS1        | nuclear casein kinase and cyclin dependent kinase substrate 1        | 1  | 205681947 | 205719404 | 37458   |
| NUDCD3        | NudC domain containing 3                                             | 7  | 44418720  | 44530479  | 111760  |
| NUDT1         | nudix hydrolase 1                                                    | 7  | 2281857   | 2290781   | 8925    |
| NUFIP1        | NUFIP1, FMR1 interacting protein 1                                   | 13 | 45513384  | 45563618  | 50235   |
| NUMB          | NUMB, endocytic adaptor protein                                      | 14 | 73741815  | 73930348  | 188534  |
| NUP153        | nucleoporin 153                                                      | 6  | 17615269  | 17706656  | 91388   |
| NUP188        | nucleoporin 188                                                      | 9  | 131709978 | 131769375 | 59398   |
| NUP210P1      | nucleoporin 210 pseudogene 1                                         | 3  | 126379452 | 126390782 | 11331   |
| NUP37         | nucleoporin 37                                                       | 12 | 102467967 | 102513902 | 45936   |
| NUP62CL       | nucleoporin 62 C-terminal like                                       | X  | 106366657 | 106449670 | 83014   |
| NUP93         | nucleoporin 93                                                       | 16 | 56764017  | 56878797  | 114781  |
| NUSAP1        | nucleolar and spindle associated protein 1                           | 15 | 41624892  | 41673248  | 48357   |
| NUTF2         | nuclear transport factor 2                                           | 16 | 67880635  | 67906470  | 25836   |
| NXN           | nucleoredoxin                                                        | 17 | 702553    | 883010    | 180458  |
| NXPE1         | neurexophilin and PC-esterase domain family member 1                 | 11 | 114392437 | 114430617 | 38181   |
| NXPH1         | neurexophilin 1                                                      | 7  | 8473585   | 8792593   | 319009  |
| NXPH2         | neurexophilin 2                                                      | 2  | 139428342 | 139537918 | 109577  |
| NYAP2         | neuronal tyrosine-phosphorylated phosphoinositide-3-kinase adaptor 2 | 2  | 226265364 | 226518734 | 253371  |
| OARD1         | O-acyl-ADP-ribose deacylase 1                                        | 6  | 41001366  | 41065526  | 64161   |
| OAZ3          | ornithine decarboxylase antizyme 3                                   | 1  | 151735445 | 151743808 | 8364    |
| OBSCN         | obscurin, cytoskeletal calmodulin and titin-interacting RhoGEF       | 1  | 228395831 | 228566577 | 170747  |
| OCA2          | OCA2 melanosomal transmembrane protein                               | 15 | 28000021  | 28344504  | 344484  |
| ODC1          | ornithine decarboxylase 1                                            | 2  | 10580094  | 10588630  | 8537    |
| <b>OGG1</b>   | 8-oxoguanine DNA glycosylase                                         | 3  | 9791628   | 9829903   | 38276   |
| OLA1          | Obg like ATPase 1                                                    | 2  | 174937175 | 175113426 | 176252  |
| OLAH          | oleoyl-ACP hydrolase                                                 | 10 | 15074226  | 15115851  | 41626   |
| OLFM3         | olfactomedin 3                                                       | 1  | 102268130 | 102462586 | 194457  |
| OLFM4         | olfactomedin 4                                                       | 13 | 53602894  | 53626192  | 23299   |
| OLFML1        | olfactomedin like 1                                                  | 11 | 7506619   | 7532608   | 25990   |
| OLIG2         | oligodendrocyte transcription factor 2                               | 21 | 34398153  | 34401504  | 3352    |
| OLR1          | oxidized low density lipoprotein receptor 1                          | 12 | 10310902  | 10324737  | 13836   |
| <b>OMA1</b>   | OMA1 zinc metallopeptidase                                           | 1  | 58881056  | 59012474  | 131419  |
| OPCML         | opioid binding protein/cell adhesion molecule like                   | 11 | 132284871 | 133402414 | 1117544 |
| <b>OPTN</b>   | optineurin                                                           | 10 | 13141449  | 13180291  | 38843   |
| OR2L13        | olfactory receptor family 2 subfamily L member 13                    | 1  | 248100493 | 248264224 | 163732  |
| <b>OR6P1</b>  | olfactory receptor family 6 subfamily P member 1                     | 1  | 158532441 | 158533394 | 954     |
| OR9Q1         | olfactory receptor family 9 subfamily Q member 1                     | 11 | 57791353  | 57949088  | 157736  |
| ORAOV1        | oral cancer overexpressed 1                                          | 11 | 69467844  | 69490184  | 22341   |
| ORC4          | origin recognition complex subunit 4                                 | 2  | 148687968 | 148779147 | 91180   |
| ORC6          | origin recognition complex subunit 6                                 | 16 | 46723555  | 46732306  | 8752    |
| OSBP2         | oxysterol binding protein 2                                          | 22 | 31089769  | 31303811  | 214043  |



|               |                                                                              |    |           |           |         |
|---------------|------------------------------------------------------------------------------|----|-----------|-----------|---------|
| OSBPL10       | oxysterol binding protein like 10                                            | 3  | 31699382  | 32119072  | 419691  |
| OSBPL11       | oxysterol binding protein like 11                                            | 3  | 125247702 | 125313934 | 66233   |
| OSBPL1A       | oxysterol binding protein like 1A                                            | 18 | 21742008  | 21977844  | 235837  |
| <b>OSBPL3</b> | oxysterol binding protein like 3                                             | 7  | 24836158  | 25021253  | 185096  |
| OSBPL6        | oxysterol binding protein like 6                                             | 2  | 179059208 | 179264160 | 204953  |
| OTC           | ornithine carbamoyltransferase                                               | X  | 38211798  | 38280703  | 68906   |
| OTUD7B        | OTU deubiquitinase 7B                                                        | 1  | 149909705 | 149982625 | 72921   |
| OTX2          | orthodenticle homeobox 2                                                     | 14 | 57267425  | 57277197  | 9773    |
| OVCH1-AS1     | OVCH1 antisense RNA 1                                                        | 12 | 29542227  | 29640421  | 98195   |
| OXCT1         | 3-oxoacid CoA-transferase 1                                                  | 5  | 41730167  | 41870621  | 140455  |
| OXR1          | oxidation resistance 1                                                       | 8  | 107282473 | 107764922 | 482450  |
| OXSR1         | oxidative stress responsive 1                                                | 3  | 38206580  | 38296979  | 90400   |
| <b>P2RX7</b>  | purinergic receptor P2X 7                                                    | 12 | 121570622 | 121623876 | 53255   |
| P4HA1         | prolyl 4-hydroxylase subunit alpha 1                                         | 10 | 74766975  | 74856732  | 89758   |
| PABPC4        | poly(A) binding protein cytoplasmic 4                                        | 1  | 40026488  | 40042462  | 15975   |
| PACRG         | parkin coregulated                                                           | 6  | 163148164 | 163736524 | 588361  |
| PACS1         | phosphofurin acidic cluster sorting protein 1                                | 11 | 65837834  | 66012218  | 174385  |
| PACSN2        | protein kinase C and casein kinase substrate in neurons 2                    | 22 | 43231418  | 43411151  | 179734  |
| PAFAH1B1      | platelet activating factor acetylhydrolase 1b regulatory subunit 1           | 17 | 2496504   | 2588909   | 92406   |
| PAFAH1B3      | platelet activating factor acetylhydrolase 1b catalytic subunit 3            | 19 | 42801185  | 42807698  | 6514    |
| PAG1          | phosphoprotein membrane anchor with glycosphingolipid microdomains 1         | 8  | 81880045  | 82024303  | 144259  |
| PAK1          | p21 (RAC1) activated kinase 1                                                | 11 | 77032752  | 77185680  | 152929  |
| PAK3          | p21 (RAC1) activated kinase 3                                                | X  | 110187513 | 110470589 | 283077  |
| PAK4          | p21 (RAC1) activated kinase 4                                                | 19 | 39616410  | 39673456  | 57047   |
| PALLD         | palladin, cytoskeletal associated protein                                    | 4  | 169418217 | 169849608 | 431392  |
| <b>PALM2</b>  | paralemmin 2                                                                 | 9  | 112403068 | 112713755 | 310688  |
| PAN3          | PAN3 poly(A) specific ribonuclease subunit                                   | 13 | 28712643  | 28869475  | 156833  |
| PANK2         | pantothenate kinase 2                                                        | 20 | 3869486   | 3907605   | 38120   |
| PANX1         | pannexin 1                                                                   | 11 | 93862094  | 93915138  | 53045   |
| PAPD5         | poly(A) RNA polymerase D5, non-canonical                                     | 16 | 50186829  | 50269221  | 82393   |
| <b>PAPPA</b>  | pappalysin 1                                                                 | 9  | 118916083 | 119164601 | 248519  |
| PAPPA2        | pappalysin 2                                                                 | 1  | 176432307 | 176814735 | 382429  |
| PAPSS2        | 3'-phosphoadenosine 5'-phosphosulfate synthase 2                             | 10 | 89419370  | 89507462  | 88093   |
| PAQR5         | progesterin and adipoQ receptor family member 5                              | 15 | 69591286  | 69700119  | 108834  |
| PARD3         | par-3 family cell polarity regulator                                         | 10 | 34398488  | 35104253  | 705766  |
| PARD3B        | par-3 family cell polarity regulator beta                                    | 2  | 205410516 | 206484886 | 1074371 |
| PARG          | poly(ADP-ribose) glycohydrolase                                              | 10 | 51026325  | 51130715  | 104391  |
| <b>PARK7</b>  | Parkinsonism associated deglycase                                            | 1  | 8014351   | 8045565   | 31215   |
| PARN          | poly(A)-specific ribonuclease                                                | 16 | 14529558  | 14726585  | 197028  |
| PARP1         | poly(ADP-ribose) polymerase 1                                                | 1  | 226548392 | 226595780 | 47389   |
| PARP12        | poly(ADP-ribose) polymerase family member 12                                 | 7  | 139723544 | 139763521 | 39978   |
| PARP4         | poly(ADP-ribose) polymerase family member 4                                  | 13 | 24995064  | 25086948  | 91885   |
| PARVB         | parvin beta                                                                  | 22 | 44395091  | 44568829  | 173739  |
| PASD1         | PAS domain containing repressor 1                                            | X  | 150732094 | 150845211 | 113118  |
| PATL2         | PAT1 homolog 2                                                               | 15 | 44957930  | 45003514  | 45585   |
| PAWR          | pro-apoptotic WT1 regulator                                                  | 12 | 79968759  | 80084877  | 116119  |
| PAX2          | paired box 2                                                                 | 10 | 102495360 | 102589698 | 94339   |
| PAX3          | paired box 3                                                                 | 2  | 223064607 | 223163715 | 99109   |
| PAX6          | paired box 6                                                                 | 11 | 31806340  | 31839509  | 33170   |
| PBK           | PDZ binding kinase                                                           | 8  | 27667137  | 27695612  | 28476   |
| PBRM1         | polybromo 1                                                                  | 3  | 52579368  | 52719933  | 140566  |
| PBX1          | PBX homeobox 1                                                               | 1  | 164524821 | 164868533 | 343713  |
| PBX3          | PBX homeobox 3                                                               | 9  | 128509624 | 128729656 | 220033  |
| PCAT4         | prostate cancer associated transcript 4 (non-protein coding)                 | 4  | 80748625  | 80798924  | 50300   |
| PCCA          | propionyl-CoA carboxylase alpha subunit                                      | 13 | 100741269 | 101182686 | 441418  |
| PCDH11X       | protocadherin 11 X-linked                                                    | X  | 91034260  | 91878229  | 843970  |
| PCDH11Y       | protocadherin 11 Y-linked                                                    | Y  | 4868267   | 5610265   | 741999  |
| PCDH15        | protocadherin related 15                                                     | 10 | 55562531  | 57387702  | 1825172 |
| PCDH19        | protocadherin 19                                                             | X  | 99546642  | 99665271  | 118630  |
| PCDH7         | protocadherin 7                                                              | 4  | 30722037  | 31148422  | 426386  |
| PCDH9         | protocadherin 9                                                              | 13 | 66876967  | 67804468  | 927502  |
| PCED1B        | PC-esterase domain containing 1B                                             | 12 | 47473386  | 47630443  | 157058  |
| PCGF3         | polycomb group ring finger 3                                                 | 4  | 699537    | 764428    | 64892   |
| PCID2         | PCI domain containing 2                                                      | 13 | 113831891 | 113863029 | 31139   |
| PCK1          | phosphoenolpyruvate carboxykinase 1                                          | 20 | 56136136  | 56141513  | 5378    |
| PCLO          | piccolo presynaptic cytomatrix protein                                       | 7  | 82383329  | 82792246  | 408918  |
| PCM1          | pericentriolar material 1                                                    | 8  | 17780349  | 17885478  | 105130  |
| PCMTD1        | protein-L-isoaspartate (D-aspartate) O-methyltransferase domain containing 1 | 8  | 52730140  | 52811735  | 81596   |
| PCNA          | proliferating cell nuclear antigen                                           | 20 | 5095599   | 5107272   | 11674   |
| <b>PCP4</b>   | Purkinje cell protein 4                                                      | 21 | 41239243  | 41301322  | 62080   |
| PCSK5         | proprotein convertase subtilisin/kexin type 5                                | 9  | 78505560  | 78977255  | 471696  |
| PCSK6         | proprotein convertase subtilisin/kexin type 6                                | 15 | 101840818 | 102065405 | 224588  |
| PCSK9         | proprotein convertase subtilisin/kexin type 9                                | 1  | 55505221  | 55530525  | 25305   |
| PDCD10        | programmed cell death 10                                                     | 3  | 167401086 | 167452727 | 51642   |
| PDCD4         | programmed cell death 4                                                      | 10 | 112631565 | 112659764 | 28200   |

|              |                                                                          |    |           |           |         |
|--------------|--------------------------------------------------------------------------|----|-----------|-----------|---------|
| PDE10A       | phosphodiesterase 10A                                                    | 6  | 165740776 | 166400091 | 659316  |
| PDE11A       | phosphodiesterase 11A                                                    | 2  | 178487980 | 178973066 | 485087  |
| PDE1A        | phosphodiesterase 1A                                                     | 2  | 183004763 | 183387919 | 383157  |
| PDE1C        | phosphodiesterase 1C                                                     | 7  | 31790793  | 32338941  | 548149  |
| PDE3A        | phosphodiesterase 3A                                                     | 12 | 20522179  | 20837315  | 315137  |
| PDE4B        | phosphodiesterase 4B                                                     | 1  | 66258197  | 66840259  | 582063  |
| PDE4D        | phosphodiesterase 4D                                                     | 5  | 58264865  | 59817947  | 1553083 |
| <b>PDE5A</b> | phosphodiesterase 5A                                                     | 4  | 120415550 | 120550146 | 134597  |
| PDE7A        | phosphodiesterase 7A                                                     | 8  | 66629745  | 66754557  | 124813  |
| PDE7B        | phosphodiesterase 7B                                                     | 6  | 136172834 | 136516712 | 343879  |
| PDE8A        | phosphodiesterase 8A                                                     | 15 | 85523671  | 85682376  | 158706  |
| PDF          | peptide deformylase (mitochondrial)                                      | 16 | 69362524  | 69364498  | 1975    |
| PDGFB        | platelet derived growth factor subunit B                                 | 22 | 39619364  | 39640756  | 21393   |
| PDGFC        | platelet derived growth factor C                                         | 4  | 157681606 | 157892546 | 210941  |
| PDGFD        | platelet derived growth factor D                                         | 11 | 103777914 | 104035107 | 257194  |
| PDGFRB       | platelet derived growth factor receptor beta                             | 5  | 149493400 | 149535435 | 42036   |
| PDGFRL       | platelet derived growth factor receptor like                             | 8  | 17433942  | 17501580  | 67639   |
| PDLIM3       | PDZ and LIM domain 3                                                     | 4  | 186422851 | 186456766 | 33916   |
| P DPR        | pyruvate dehydrogenase phosphatase regulatory subunit                    | 16 | 70147529  | 70195203  | 47675   |
| PDS5A        | PDS5 cohesin associated factor A                                         | 4  | 39824483  | 39979576  | 155094  |
| PDS5B        | PDS5 cohesin associated factor B                                         | 13 | 33160564  | 33352157  | 191594  |
| PDS52        | decaprenyl diphosphate synthase subunit 2                                | 6  | 107473761 | 107780768 | 307008  |
| PDXDC1       | pyridoxal dependent decarboxylase domain containing 1                    | 16 | 15068448  | 15233196  | 164749  |
| PDXK         | pyridoxal kinase                                                         | 21 | 45138975  | 45182188  | 43214   |
| PDYN         | prodynorphin                                                             | 20 | 1959403   | 1974732   | 15330   |
| PDZD2        | PDZ domain containing 2                                                  | 5  | 31639517  | 32111037  | 471521  |
| PDZRN3       | PDZ domain containing ring finger 3                                      | 3  | 73431584  | 73674091  | 242508  |
| PDZRN4       | PDZ domain containing ring finger 4                                      | 12 | 41582250  | 41968392  | 386143  |
| PEAK1        | pseudopodium enriched atypical kinase 1                                  | 15 | 77400471  | 77712486  | 312016  |
| PEBP4        | phosphatidylethanolamine binding protein 4                               | 8  | 22570769  | 22857513  | 286745  |
| <b>PELP1</b> | proline, glutamate and leucine rich protein 1                            | 17 | 4574679   | 4607632   | 32954   |
| PEX10        | peroxisomal biogenesis factor 10                                         | 1  | 2336236   | 2345236   | 9001    |
| PEX12        | peroxisomal biogenesis factor 12                                         | 17 | 33901814  | 33905882  | 4069    |
| PEX14        | peroxisomal biogenesis factor 14                                         | 1  | 10532345  | 10690815  | 158471  |
| PEX19        | peroxisomal biogenesis factor 19                                         | 1  | 160246602 | 160256138 | 9537    |
| PEX5L        | peroxisomal biogenesis factor 5 like                                     | 3  | 179512746 | 179754841 | 242096  |
| PFAS         | phosphoribosylformylglycinamide synthase                                 | 17 | 8150936   | 8173809   | 22874   |
| <b>PFN1</b>  | profilin 1                                                               | 17 | 4848947   | 4852356   | 3410    |
| PGAP1        | post-GPI attachment to proteins 1                                        | 2  | 197697728 | 197792520 | 94793   |
| PGBD1        | piggyBac transposable element derived 1                                  | 6  | 28249314  | 28270326  | 21013   |
| PGGT1B       | protein geranylgeranyltransferase type I subunit beta                    | 5  | 114546527 | 114598569 | 52043   |
| PGM1         | phosphoglucomutase 1                                                     | 1  | 64058947  | 64125916  | 66970   |
| PGM2L1       | phosphoglucomutase 2 like 1                                              | 11 | 74041363  | 74109518  | 68156   |
| PGM5         | phosphoglucomutase 5                                                     | 9  | 70943224  | 71145977  | 202754  |
| PGR          | progesterone receptor                                                    | 11 | 100900355 | 101001255 | 100901  |
| PHACTR1      | phosphatase and actin regulator 1                                        | 6  | 12717893  | 13288645  | 570753  |
| PHACTR2      | phosphatase and actin regulator 2                                        | 6  | 143857982 | 144152322 | 294341  |
| PHACTR3      | phosphatase and actin regulator 3                                        | 20 | 58152564  | 58422766  | 270203  |
| PHC3         | polyhomeotic homolog 3                                                   | 3  | 169804520 | 169899537 | 95018   |
| PHEX         | phosphate regulating endopeptidase homolog, X-linked                     | X  | 22050559  | 22269427  | 218869  |
| PHF20        | PHD finger protein 20                                                    | 20 | 34359896  | 34538303  | 178408  |
| PHF8         | PHD finger protein 8                                                     | X  | 53963109  | 54075391  | 112283  |
| PHIP         | pleckstrin homology domain interacting protein                           | 6  | 79645584  | 79787953  | 142370  |
| PHKB         | phosphorylase kinase regulatory subunit beta                             | 16 | 47495034  | 47735434  | 240401  |
| PHLPP1       | PH domain and leucine rich repeat protein phosphatase 1                  | 18 | 60382672  | 60647666  | 264995  |
| PHLPP2       | PH domain and leucine rich repeat protein phosphatase 2                  | 16 | 71671738  | 71758604  | 86867   |
| PHOX2B       | paired like homeobox 2b                                                  | 4  | 41746099  | 41750987  | 4889    |
| PHTF1        | putative homeodomain transcription factor 1                              | 1  | 114239453 | 114302111 | 62659   |
| PHYH         | phytanoyl-CoA 2-hydroxylase                                              | 10 | 13319796  | 13344412  | 24617   |
| PI4KA        | phosphatidylinositol 4-kinase alpha                                      | 22 | 21061979  | 21213705  | 151727  |
| PIAS2        | protein inhibitor of activated STAT 2                                    | 18 | 44388353  | 44500123  | 111771  |
| PIBF1        | progesterone immunomodulatory binding factor 1                           | 13 | 73356197  | 73590591  | 234395  |
| PICALM       | phosphatidylinositol binding clathrin assembly protein                   | 11 | 85668727  | 85780924  | 112198  |
| PID1         | phosphotyrosine interaction domain containing 1                          | 2  | 229715242 | 230136001 | 420760  |
| PIEZO2       | piezo type mechanosensitive ion channel component 2                      | 18 | 10666480  | 11148587  | 482108  |
| PIGA         | phosphatidylinositol glycan anchor biosynthesis class A                  | X  | 15337573  | 15353676  | 16104   |
| PIGK         | phosphatidylinositol glycan anchor biosynthesis class K                  | 1  | 77554675  | 77685115  | 130441  |
| PIGL         | phosphatidylinositol glycan anchor biosynthesis class L                  | 17 | 16120505  | 16252115  | 131611  |
| PIGN         | phosphatidylinositol glycan anchor biosynthesis class N                  | 18 | 59710800  | 59854351  | 143552  |
| PIGS         | phosphatidylinositol glycan anchor biosynthesis class S                  | 17 | 26880401  | 26898890  | 18490   |
| PIK3C2A      | phosphatidylinositol-4-phosphate 3-kinase catalytic subunit type 2 alpha | 11 | 17099277  | 17229530  | 130254  |
| PIK3C2B      | phosphatidylinositol-4-phosphate 3-kinase catalytic subunit type 2 beta  | 1  | 204391756 | 204463852 | 72097   |
| PIK3C2G      | phosphatidylinositol-4-phosphate 3-kinase catalytic subunit type 2 gamma | 12 | 18400548  | 18801348  | 400801  |
| PIK3C3       | phosphatidylinositol 3-kinase catalytic subunit type 3                   | 18 | 39535171  | 39667794  | 132624  |

|                |                                                                        |    |           |           |        |
|----------------|------------------------------------------------------------------------|----|-----------|-----------|--------|
| PIK3CA         | phosphatidylinositol-4,5-bisphosphate 3-kinase catalytic subunit alpha | 3  | 178865902 | 178957881 | 91980  |
| PIK3CG         | phosphatidylinositol-4,5-bisphosphate 3-kinase catalytic subunit gamma | 7  | 106505723 | 106547590 | 41868  |
| PIK3R1         | phosphoinositide-3-kinase regulatory subunit 1                         | 5  | 67511548  | 67597649  | 86102  |
| PIK3R5         | phosphoinositide-3-kinase regulatory subunit 5                         | 17 | 8782233   | 8869029   | 86797  |
| PIN1           | peptidylprolyl cis/trans isomerase, NIMA-interacting 1                 | 19 | 9945933   | 9960358   | 14426  |
| PINK1          | PTEN induced putative kinase 1                                         | 1  | 20959948  | 20978004  | 18057  |
| PINK1-AS       | PINK1 antisense RNA                                                    | 1  | 20969150  | 20978686  | 9537   |
| PINX1          | PIN2/TERF1 interacting, telomerase inhibitor 1                         | 8  | 10622473  | 10697394  | 74922  |
| PIP4K2A        | phosphatidylinositol-5-phosphate 4-kinase type 2 alpha                 | 10 | 22823778  | 23003484  | 179707 |
| PIP5K1B        | phosphatidylinositol-4-phosphate 5-kinase type 1 beta                  | 9  | 71320575  | 71624092  | 303518 |
| PITPNA         | phosphatidylinositol transfer protein alpha                            | 17 | 1421012   | 1466110   | 45099  |
| PITPNC1        | phosphatidylinositol transfer protein, cytoplasmic 1                   | 17 | 65373575  | 65693372  | 319798 |
| PITX1          | paired like homeodomain 1                                              | 5  | 134363425 | 134370503 | 7079   |
| PITX3          | paired like homeodomain 3                                              | 10 | 103989943 | 104001231 | 11289  |
| PIWIL2         | piwi like RNA-mediated gene silencing 2                                | 8  | 22132810  | 22215076  | 82267  |
| PIWIL3         | piwi like RNA-mediated gene silencing 3                                | 22 | 25115001  | 25170687  | 55687  |
| PJA2           | praja ring finger ubiquitin ligase 2                                   | 5  | 108670410 | 108745695 | 75286  |
| PKD1           | polycystin 1, transient receptor potential channel interacting         | 16 | 2138711   | 2185899   | 47189  |
| PKD2           | polycystin 2, transient receptor potential cation channel              | 4  | 88928820  | 88998299  | 70110  |
| PKHD1          | PKHD1, fibrocystin/polyductin                                          | 6  | 51480098  | 51952423  | 472326 |
| PKIG           | cAMP-dependent protein kinase inhibitor gamma                          | 20 | 43160426  | 43252888  | 92463  |
| PKN2           | protein kinase N2                                                      | 1  | 89149905  | 89301938  | 152034 |
| PLA1A          | phospholipase A1 member A                                              | 3  | 119316689 | 119348658 | 31970  |
| PLA2G16        | phospholipase A2 group XVI                                             | 11 | 63340667  | 63384355  | 43689  |
| PLA2G1B        | phospholipase A2 group IB                                              | 12 | 120759914 | 120765592 | 5679   |
| PLA2G4A        | phospholipase A2 group IVA                                             | 1  | 186798085 | 186958113 | 160029 |
| PLA2G4E        | phospholipase A2 group IVE                                             | 15 | 42273780  | 42343388  | 69609  |
| PLA2G6         | phospholipase A2 group VI                                              | 22 | 38507502  | 38601697  | 94196  |
| PLAA           | phospholipase A2 activating protein                                    | 9  | 26904081  | 26947461  | 43381  |
| PLAC1          | placenta specific 1                                                    | X  | 133699868 | 133898352 | 198485 |
| PLAC8          | placenta specific 8                                                    | 4  | 84011201  | 84058228  | 47028  |
| PLAG1          | PLAG1 zinc finger                                                      | 8  | 57073463  | 57123883  | 50421  |
| PLAGL1         | PLAG1 like zinc finger 1                                               | 6  | 144261437 | 144385735 | 124299 |
| PLAT           | plasminogen activator, tissue type                                     | 8  | 42032236  | 42065242  | 33007  |
| PLB1           | phospholipase B1                                                       | 2  | 28680012  | 28866654  | 186643 |
| PLCB1          | phospholipase C beta 1                                                 | 20 | 8112824   | 8949003   | 836180 |
| PLCB4          | phospholipase C beta 4                                                 | 20 | 9049410   | 9461889   | 412480 |
| PLCE1          | phospholipase C epsilon 1                                              | 10 | 95753746  | 96092580  | 338835 |
| PLCG2          | phospholipase C gamma 2                                                | 16 | 81772702  | 81991899  | 219198 |
| PLCH1          | phospholipase C eta 1                                                  | 3  | 155093369 | 155462856 | 369488 |
| PLCL1          | phospholipase C like 1                                                 | 2  | 198669426 | 199437305 | 767880 |
| PLCL2          | phospholipase C like 2                                                 | 3  | 16844159  | 17132086  | 287928 |
| PLD1           | phospholipase D1                                                       | 3  | 171318195 | 171528740 | 210546 |
| PLD5           | phospholipase D family member 5                                        | 1  | 242246288 | 242687998 | 441711 |
| PLEC           | plectin                                                                | 8  | 144989321 | 145050902 | 61582  |
| PLEKHA1        | pleckstrin homology domain containing A1                               | 10 | 124134212 | 124191867 | 57656  |
| PLEKHA5        | pleckstrin homology domain containing A5                               | 12 | 19282648  | 19529334  | 246687 |
| PLEKHA7        | pleckstrin homology domain containing A7                               | 11 | 16799842  | 17035990  | 236149 |
| PLEKHG1        | pleckstrin homology and RhoGEF domain containing G1                    | 6  | 150920999 | 151164799 | 243801 |
| <b>PLEKHG5</b> | pleckstrin homology and RhoGEF domain containing G5                    | 1  | 6526152   | 6580121   | 53970  |
| PLEKHM1        | pleckstrin homology and RUN domain containing M1                       | 17 | 43513266  | 43568115  | 54850  |
| PLEKHM3        | pleckstrin homology domain containing M3                               | 2  | 208693027 | 208890284 | 197258 |
| PLG            | plasminogen                                                            | 6  | 161123270 | 161174347 | 51078  |
| PLOD2          | procollagen-lysine,2-oxoglutarate 5-dioxygenase 2                      | 3  | 145787227 | 145881440 | 94214  |
| PLP1           | proteolipid protein 1                                                  | X  | 103028647 | 103047548 | 18902  |
| PLS1           | plastin 1                                                              | 3  | 142315229 | 142432506 | 117278 |
| PLXDC2         | plexin domain containing 2                                             | 10 | 20105168  | 20578785  | 473618 |
| PLXNA2         | plexin A2                                                              | 1  | 208195587 | 208417665 | 222079 |
| PLXNA4         | plexin A4                                                              | 7  | 131808091 | 132333447 | 525357 |
| PLXNC1         | plexin C1                                                              | 12 | 94542499  | 94701451  | 158953 |
| PM20D1         | peptidase M20 domain containing 1                                      | 1  | 205797150 | 205819260 | 22111  |
| PMP22          | peripheral myelin protein 22                                           | 17 | 15133095  | 15168643  | 35549  |
| PNKP           | polynucleotide kinase 3'-phosphatase                                   | 19 | 50364461  | 50371166  | 6706   |
| PNMA2          | paraneoplastic Ma antigen 2                                            | 8  | 26362202  | 26371608  | 9407   |
| PNMT           | phenylethanolamine N-methyltransferase                                 | 17 | 37824234  | 37826728  | 2495   |
| PNP            | purine nucleoside phosphorylase                                        | 14 | 20937113  | 20945253  | 8141   |
| PNPO           | pyridoxamine 5'-phosphate oxidase                                      | 17 | 46018872  | 46025654  | 6783   |
| POC1B          | POC1 centriolar protein B                                              | 12 | 89813495  | 89919801  | 106307 |
| POC5           | POC5 centriolar protein                                                | 5  | 74969949  | 75013313  | 43365  |
| PODXL          | podocalyxin like                                                       | 7  | 131185021 | 131242976 | 57956  |
| POF1B          | premature ovarian failure, 1B                                          | X  | 84532402  | 84634748  | 102347 |
| POGZ           | pogo transposable element derived with ZNF domain                      | 1  | 151375200 | 151431941 | 56742  |
| POLA1          | DNA polymerase alpha 1, catalytic subunit                              | X  | 24712036  | 25015103  | 303068 |
| POLA2          | DNA polymerase alpha 2, accessory subunit                              | 11 | 65029233  | 65073060  | 43828  |
| POLDIP3        | DNA polymerase delta interacting protein 3                             | 22 | 42979727  | 43010968  | 31242  |
| POLE2          | DNA polymerase epsilon 2, accessory subunit                            | 14 | 50110273  | 50155140  | 44868  |

|                 |                                                                          |    |           |           |        |
|-----------------|--------------------------------------------------------------------------|----|-----------|-----------|--------|
| POLG            | DNA polymerase gamma, catalytic subunit                                  | 15 | 89859534  | 89878092  | 18559  |
| POLI            | DNA polymerase iota                                                      | 18 | 51795774  | 51847636  | 51863  |
| POLN            | DNA polymerase nu                                                        | 4  | 2073645   | 2243848   | 170204 |
| POLQ            | DNA polymerase theta                                                     | 3  | 121150278 | 121264853 | 114576 |
| POLR1A          | RNA polymerase I subunit A                                               | 2  | 86247339  | 86333278  | 85940  |
| POLR1B          | RNA polymerase I subunit B                                               | 2  | 113299492 | 113334635 | 35144  |
| POLR2C          | RNA polymerase II subunit C                                              | 16 | 57496299  | 57505922  | 9624   |
| POLR2F          | RNA polymerase II subunit F                                              | 22 | 38348614  | 38437922  | 89309  |
| POLR3A          | RNA polymerase III subunit A                                             | 10 | 79734907  | 79789303  | 54397  |
| POLR3B          | RNA polymerase III subunit B                                             | 12 | 106751436 | 106903976 | 152541 |
| POLR3E          | RNA polymerase III subunit E                                             | 16 | 22308730  | 22346424  | 37695  |
| POMC            | proopiomelanocortin                                                      | 2  | 25383722  | 25391772  | 8051   |
| POMGNT1         | protein O-linked mannose N-acetylglucosaminyltransferase 1 (beta 1,2-)   | 1  | 46654354  | 46685977  | 31624  |
| POMT1           | protein O-mannosyltransferase 1                                          | 9  | 134378289 | 134399193 | 20905  |
| POMT2           | protein O-mannosyltransferase 2                                          | 14 | 77741299  | 77787227  | 45929  |
| <b>PON1</b>     | paraoxonase 1                                                            | 7  | 94926988  | 95025673  | 98686  |
| <b>PON2</b>     | paraoxonase 2                                                            | 7  | 95034175  | 95064510  | 30336  |
| <b>PON3</b>     | paraoxonase 3                                                            | 7  | 94989256  | 95025680  | 36425  |
| PORCN           | porcupine homolog (Drosophila)                                           | X  | 48367350  | 48379202  | 11853  |
| POT1            | protection of telomeres 1                                                | 7  | 124462440 | 124570037 | 107598 |
| POU2F1          | POU class 2 homeobox 1                                                   | 1  | 167190066 | 167396582 | 206517 |
| POU6F2          | POU class 6 homeobox 2                                                   | 7  | 39017598  | 39532694  | 515097 |
| <b>PPA2</b>     | pyrophosphatase (inorganic) 2                                            | 4  | 106290234 | 106395238 | 105005 |
| PPARA           | peroxisome proliferator activated receptor alpha                         | 22 | 46546424  | 46639653  | 93230  |
| PPARD           | peroxisome proliferator activated receptor delta                         | 6  | 35310335  | 35395968  | 85634  |
| PPARG           | peroxisome proliferator activated receptor gamma                         | 3  | 12328867  | 12475855  | 146989 |
| PPARGC1A        | PPARG coactivator 1 alpha                                                | 4  | 23756664  | 23905712  | 149049 |
| PPARGC1B        | PPARG coactivator 1 beta                                                 | 5  | 149109861 | 149234585 | 124725 |
| PPAT            | phosphoribosyl pyrophosphate amidotransferase                            | 4  | 57259528  | 57301781  | 42254  |
| PPFIA1          | PTPRF interacting protein alpha 1                                        | 11 | 70116806  | 70230509  | 113704 |
| PPFIA2          | PTPRF interacting protein alpha 2                                        | 12 | 81652045  | 82153332  | 501288 |
| PPHLN1          | periplakin 1                                                             | 12 | 42632249  | 42853517  | 221269 |
| PPIG            | peptidylprolyl isomerase G                                               | 2  | 170440850 | 170497916 | 57067  |
| PPIL2           | peptidylprolyl isomerase like 2                                          | 22 | 22006559  | 22054304  | 47746  |
| PPM1D           | protein phosphatase, Mg2+/Mn2+ dependent 1D                              | 17 | 58677544  | 58741849  | 64306  |
| PPM1H           | protein phosphatase, Mg2+/Mn2+ dependent 1H                              | 12 | 63037762  | 63328817  | 291056 |
| PPM1K           | protein phosphatase, Mg2+/Mn2+ dependent 1K                              | 4  | 89178772  | 89205921  | 27150  |
| PPM1L           | protein phosphatase, Mg2+/Mn2+ dependent 1L                              | 3  | 160473390 | 160796695 | 323306 |
| PPP1CC          | protein phosphatase 1 catalytic subunit gamma                            | 12 | 111157485 | 111180744 | 23260  |
| PPP1R10         | protein phosphatase 1 regulatory subunit 10                              | 6  | 30568177  | 30586389  | 18213  |
| <b>PPP1R13B</b> | protein phosphatase 1 regulatory subunit 13B                             | 14 | 104200089 | 104313927 | 113839 |
| PPP1R14D        | protein phosphatase 1 regulatory inhibitor subunit 14D                   | 15 | 41107650  | 41120907  | 13258  |
| PPP1R17         | protein phosphatase 1 regulatory subunit 17                              | 7  | 31726329  | 31748069  | 21741  |
| PPP1R1C         | protein phosphatase 1 regulatory inhibitor subunit 1C                    | 2  | 182818968 | 182996125 | 177158 |
| PPP1R3A         | protein phosphatase 1 regulatory subunit 3A                              | 7  | 113516832 | 113715975 | 199144 |
| PPP1R3F         | protein phosphatase 1 regulatory subunit 3F                              | X  | 49126306  | 49157929  | 31624  |
| PPP1R9A         | protein phosphatase 1 regulatory subunit 9A                              | 7  | 94536514  | 94925727  | 389214 |
| PPP2R1A         | protein phosphatase 2 scaffold subunit Aalpha                            | 19 | 52693292  | 52730687  | 37396  |
| PPP2R2B         | protein phosphatase 2 regulatory subunit Bbeta                           | 5  | 145967936 | 146464347 | 496412 |
| PPP2R2C         | protein phosphatase 2 regulatory subunit Bgamma                          | 4  | 6322305   | 6565327   | 243023 |
| PPP2R5C         | protein phosphatase 2 regulatory subunit B'gamma                         | 14 | 102228135 | 102394326 | 166192 |
| PPP2R5D         | protein phosphatase 2 regulatory subunit B'delta                         | 6  | 42952237  | 42980080  | 27844  |
| PPP2R5E         | protein phosphatase 2 regulatory subunit B'epsilon                       | 14 | 63838075  | 64010092  | 172018 |
| PPP3CA          | protein phosphatase 3 catalytic subunit alpha                            | 4  | 101944566 | 102269435 | 324870 |
| PPP3CC          | protein phosphatase 3 catalytic subunit gamma                            | 8  | 22298332  | 22398652  | 100321 |
| PPP3R1          | protein phosphatase 3 regulatory subunit B, alpha                        | 2  | 68405989  | 68483369  | 77381  |
| PPP6R1          | protein phosphatase 6 regulatory subunit 1                               | 19 | 55741148  | 55770363  | 29216  |
| PPP6R2          | protein phosphatase 6 regulatory subunit 2                               | 22 | 50781733  | 50883514  | 101782 |
| PPP6R3          | protein phosphatase 6 regulatory subunit 3                               | 11 | 68228186  | 68382802  | 154617 |
| PQLC1           | PQ loop repeat containing 1                                              | 18 | 77662420  | 77711664  | 49245  |
| PRC1            | protein regulator of cytokinesis 1                                       | 15 | 91509270  | 91538859  | 29590  |
| PRCP            | prolylcarboxypeptidase                                                   | 11 | 82534544  | 82681626  | 147083 |
| PRDM10          | PR/SET domain 10                                                         | 11 | 129769601 | 129872730 | 103130 |
| PRDM15          | PR/SET domain 15                                                         | 21 | 43218385  | 43299591  | 81207  |
| PRDM16          | PR/SET domain 16                                                         | 1  | 2985732   | 3355185   | 369454 |
| PRDM2           | PR/SET domain 2                                                          | 1  | 14026693  | 14151574  | 124882 |
| PRDM4           | PR/SET domain 4                                                          | 12 | 108126643 | 108155049 | 28407  |
| <b>PRDM5</b>    | PR/SET domain 5                                                          | 4  | 121606074 | 121844025 | 237952 |
| PRDX6           | peroxiredoxin 6                                                          | 1  | 173446405 | 173457946 | 11542  |
| PREPL           | prolyl endopeptidase-like                                                | 2  | 44543420  | 44589001  | 45582  |
| PREX1           | phosphatidylinositol-3,4,5-trisphosphate dependent Rac exchange factor 1 | 20 | 47240790  | 47444420  | 203631 |
| PREX2           | phosphatidylinositol-3,4,5-trisphosphate dependent Rac exchange factor 2 | 8  | 68864353  | 69149265  | 284913 |
| PRICKLE1        | prickle planar cell polarity protein 1                                   | 12 | 42852140  | 42984157  | 132018 |
| PRIM2           | primase (DNA) subunit 2                                                  | 6  | 57179603  | 57513375  | 333773 |

|               |                                                                |    |           |           |         |
|---------------|----------------------------------------------------------------|----|-----------|-----------|---------|
| PRIMPOL       | primase and DNA directed polymerase                            | 4  | 185570767 | 185616117 | 45351   |
| PRKAA1        | protein kinase AMP-activated catalytic subunit alpha 1         | 5  | 40759481  | 40798476  | 38996   |
| PRKAA2        | protein kinase AMP-activated catalytic subunit alpha 2         | 1  | 57110995  | 57181008  | 70014   |
| PRKAG2        | protein kinase AMP-activated non-catalytic subunit gamma 2     | 7  | 151253197 | 151574210 | 321014  |
| PRKAR1B       | protein kinase cAMP-dependent type I regulatory subunit beta   | 7  | 588834    | 767287    | 178454  |
| PRKAR2A       | protein kinase cAMP-dependent type II regulatory subunit alpha | 3  | 48782030  | 48885279  | 103250  |
| PRKAR2B       | protein kinase cAMP-dependent type II regulatory subunit beta  | 7  | 106685094 | 106802256 | 117163  |
| PRKCA         | protein kinase C alpha                                         | 17 | 64298754  | 64806861  | 508108  |
| PRKCB         | protein kinase C beta                                          | 16 | 23847322  | 24231932  | 384611  |
| PRKCE         | protein kinase C epsilon                                       | 2  | 45878484  | 46415129  | 536646  |
| PRKCG         | protein kinase C gamma                                         | 19 | 54382444  | 54410906  | 28463   |
| PRKCH         | protein kinase C eta                                           | 14 | 61654277  | 62017694  | 363418  |
| PRKCC         | protein kinase C theta                                         | 10 | 6469105   | 6622263   | 153159  |
| PRKCSH        | protein kinase C substrate 80K-H                               | 19 | 11546109  | 11561783  | 15675   |
| PRKCZ         | protein kinase C zeta                                          | 1  | 1981909   | 2116834   | 134926  |
| <b>PRKD1</b>  | protein kinase D1                                              | 14 | 30045687  | 30661104  | 615418  |
| PRKD3         | protein kinase D3                                              | 2  | 37477645  | 37551951  | 74307   |
| PRKDC         | protein kinase, DNA-activated, catalytic polypeptide           | 8  | 48685669  | 48872743  | 187075  |
| PRKG1         | protein kinase, cGMP-dependent, type I                         | 10 | 52750945  | 54058110  | 1307166 |
| PRKX          | protein kinase, X-linked                                       | X  | 3522411   | 3631649   | 109239  |
| PRKY          | protein kinase, Y-linked, pseudogene                           | Y  | 7142013   | 7249589   | 107577  |
| PRLR          | prolactin receptor                                             | 5  | 35048861  | 35230794  | 181934  |
| PRMT1         | protein arginine methyltransferase 1                           | 19 | 50179043  | 50192286  | 13244   |
| PRMT2         | protein arginine methyltransferase 2                           | 21 | 48055079  | 48085036  | 29958   |
| PRND          | prion like protein doppel                                      | 20 | 4702556   | 4709106   | 6551    |
| PRNP          | prion protein                                                  | 20 | 4666882   | 4682236   | 15355   |
| PROCA1        | protein interacting with cyclin A1                             | 17 | 27030215  | 27038872  | 8658    |
| PRODH         | proline dehydrogenase 1                                        | 22 | 18900294  | 18924066  | 23773   |
| PROSER2       | proline and serine rich 2                                      | 10 | 11865338  | 11914276  | 48939   |
| PROX1         | prospero homeobox 1                                            | 1  | 214156524 | 214214595 | 58072   |
| PRPF3         | pre-mRNA processing factor 3                                   | 1  | 150293925 | 150325671 | 31747   |
| PRPF4         | pre-mRNA processing factor 4                                   | 9  | 116037623 | 116055185 | 17563   |
| PRPF40A       | pre-mRNA processing factor 40 homolog A                        | 2  | 153508107 | 153574511 | 66405   |
| PRPF4B        | pre-mRNA processing factor 4B                                  | 6  | 4021501   | 4065217   | 43717   |
| PRPF6         | pre-mRNA processing factor 6                                   | 20 | 62612488  | 62664453  | 51966   |
| PRPS1         | phosphoribosyl pyrophosphate synthetase 1                      | X  | 106871737 | 106894256 | 22520   |
| PRPSAP2       | phosphoribosyl pyrophosphate synthetase associated protein 2   | 17 | 18743398  | 18834581  | 91184   |
| PRR11         | proline rich 11                                                | 17 | 57232860  | 57282066  | 49207   |
| PRR16         | proline rich 16                                                | 5  | 119799973 | 120023027 | 223055  |
| PRR5L         | proline rich 5 like                                            | 11 | 36317838  | 36486754  | 168917  |
| PRRG1         | proline rich and Gla domain 1                                  | X  | 37208528  | 37316548  | 108021  |
| PRRG4         | proline rich and Gla domain 4                                  | 11 | 32851489  | 32879669  | 28181   |
| PRRT2         | proline rich transmembrane protein 2                           | 16 | 29823177  | 29827201  | 4025    |
| PRSS23        | protease, serine 23                                            | 11 | 86502101  | 86663952  | 161852  |
| PRSS53        | protease, serine 53                                            | 16 | 31094746  | 31100949  | 6204    |
| PRSS55        | protease, serine 55                                            | 8  | 10383056  | 10411676  | 28621   |
| <b>PRUNE2</b> | prune homolog 2                                                | 9  | 79226292  | 79521003  | 294712  |
| PRX           | periaxin                                                       | 19 | 40899675  | 40919273  | 19599   |
| PRY           | PTPN13-like, Y-linked                                          | Y  | 24636544  | 24660784  | 24241   |
| PSAP          | prosaposin                                                     | 10 | 73576055  | 73611126  | 35072   |
| PSD3          | pleckstrin and Sec7 domain containing 3                        | 8  | 18384811  | 18942240  | 557430  |
| <b>PSEN1</b>  | presenilin 1                                                   | 14 | 73603126  | 73690399  | 87274   |
| PSEN2         | presenilin 2                                                   | 1  | 227057885 | 227083806 | 25922   |
| PSENE1        | presenilin enhancer gamma-secretase subunit                    | 19 | 36236015  | 36237911  | 1897    |
| PSMA1         | proteasome subunit alpha 1                                     | 11 | 14515329  | 14665181  | 149853  |
| PSMA4         | proteasome subunit alpha 4                                     | 15 | 78832747  | 78841604  | 8858    |
| PSMA5         | proteasome subunit alpha 5                                     | 1  | 109941653 | 109969062 | 27410   |
| PSMB1         | proteasome subunit beta 1                                      | 6  | 170844205 | 170862429 | 18225   |
| PSMB9         | proteasome subunit beta 9                                      | 6  | 32811913  | 32827362  | 15450   |
| PSMC4         | proteasome 26S subunit, ATPase 4                               | 19 | 40476912  | 40487348  | 10437   |
| PSMD1         | proteasome 26S subunit, non-ATPase 1                           | 2  | 231921578 | 232037541 | 115964  |
| PSMD14        | proteasome 26S subunit, non-ATPase 14                          | 2  | 162164549 | 162268228 | 103680  |
| PSMD6         | proteasome 26S subunit, non-ATPase 6                           | 3  | 63996225  | 64009658  | 13434   |
| PSMG1         | proteasome assembly chaperone 1                                | 21 | 40546695  | 40555777  | 9083    |
| PSMG3-AS1     | PSMG3 antisense RNA 1 (head to head)                           | 7  | 1609709   | 1629262   | 19554   |
| PSPC1         | paraspeckle component 1                                        | 13 | 20248896  | 20357142  | 108247  |
| PSPH          | phosphoserine phosphatase                                      | 7  | 56078744  | 56119297  | 40554   |
| PSTK          | phosphoserine-tRNA kinase                                      | 10 | 124713897 | 124757029 | 43133   |
| PSTPIP2       | proline-serine-threonine phosphatase interacting protein 2     | 18 | 43563502  | 43652238  | 88737   |
| PTAR1         | protein prenyltransferase alpha subunit repeat containing 1    | 9  | 72324438  | 72374875  | 50438   |
| PTCRA         | pre T-cell antigen receptor alpha                              | 6  | 42883727  | 42893573  | 9847    |
| PTEN          | phosphatase and tensin homolog                                 | 10 | 89622870  | 89731687  | 108818  |
| <b>PTGER3</b> | prostaglandin E receptor 3                                     | 1  | 71318036  | 71513491  | 195456  |
| PTGS1         | prostaglandin-endoperoxide synthase 1                          | 9  | 125132824 | 125157982 | 25159   |
| PTGS2         | prostaglandin-endoperoxide synthase 2                          | 1  | 186640923 | 186649559 | 8637    |
| PTK2          | protein tyrosine kinase 2                                      | 8  | 141667999 | 142012315 | 344317  |
| PTK7          | protein tyrosine kinase 7 (inactive)                           | 6  | 43044006  | 43129457  | 85452   |

|                 |                                                                                         |    |           |           |         |
|-----------------|-----------------------------------------------------------------------------------------|----|-----------|-----------|---------|
| PTN             | pleiotrophin                                                                            | 7  | 136912088 | 137028611 | 116524  |
| PTPDC1          | protein tyrosine phosphatase domain containing 1                                        | 9  | 96793076  | 96872138  | 79063   |
| PTPN1           | protein tyrosine phosphatase, non-receptor type 1                                       | 20 | 49126891  | 49201299  | 74409   |
| PTPN11          | protein tyrosine phosphatase, non-receptor type 11                                      | 12 | 112856155 | 112947717 | 91563   |
| PTPN13          | protein tyrosine phosphatase, non-receptor type 13                                      | 4  | 87515468  | 87736324  | 220857  |
| PTPN14          | protein tyrosine phosphatase, non-receptor type 14                                      | 1  | 214522039 | 214725792 | 203754  |
| PTPN21          | protein tyrosine phosphatase, non-receptor type 21                                      | 14 | 88932122  | 89021077  | 88956   |
| PTPN4           | protein tyrosine phosphatase, non-receptor type 4                                       | 2  | 120517207 | 120741394 | 224188  |
| PTPRC           | protein tyrosine phosphatase, receptor type C                                           | 1  | 198607801 | 198726545 | 118745  |
| PTPRD           | protein tyrosine phosphatase, receptor type D                                           | 9  | 8314246   | 10612723  | 2298478 |
| PTPRE           | protein tyrosine phosphatase, receptor type E                                           | 10 | 129705325 | 129884119 | 178795  |
| PTPRG           | protein tyrosine phosphatase, receptor type G                                           | 3  | 61547243  | 62283288  | 736046  |
| PTPRK           | protein tyrosine phosphatase, receptor type K                                           | 6  | 128289924 | 128841870 | 551947  |
| <b>PTPRM</b>    | protein tyrosine phosphatase, receptor type M                                           | 18 | 7566780   | 8406859   | 840080  |
| PTPRN2          | protein tyrosine phosphatase, receptor type N2                                          | 7  | 157331750 | 158380480 | 1048731 |
| PTPRQ           | protein tyrosine phosphatase, receptor type Q                                           | 12 | 80799774  | 81072802  | 273029  |
| PTPRR           | protein tyrosine phosphatase, receptor type R                                           | 12 | 71031853  | 71314623  | 282771  |
| <b>PTPRT</b>    | protein tyrosine phosphatase, receptor type T                                           | 20 | 40701392  | 41818610  | 1117219 |
| PTPRZ1          | protein tyrosine phosphatase, receptor type Z1                                          | 7  | 121513143 | 121702090 | 188948  |
| PTTG1IP         | PTTG1 interacting protein                                                               | 21 | 46269500  | 46293752  | 24253   |
| PUM1            | pumilio RNA binding family member 1                                                     | 1  | 31404353  | 31538838  | 134486  |
| PURG            | purine rich element binding protein G                                                   | 8  | 30853321  | 30891231  | 37911   |
| PUS10           | pseudouridylate synthase 10                                                             | 2  | 61167357  | 61245394  | 78038   |
| <b>PVR</b>      | poliovirus receptor                                                                     | 19 | 45147098  | 45166850  | 19753   |
| PVT1            | Pvt1 oncogene (non-protein coding)                                                      | 8  | 128806779 | 129113499 | 306721  |
| PXDNL           | peroxidasin like                                                                        | 8  | 52232138  | 52722005  | 489868  |
| PXK             | PX domain containing serine/threonine kinase like                                       | 3  | 58318607  | 58411748  | 93142   |
| PXT1            | peroxisomal, testis specific 1                                                          | 6  | 36358328  | 36410666  | 52339   |
| PYGO1           | pygopus family PHD finger 1                                                             | 15 | 55831088  | 55881145  | 50058   |
| PYHIN1          | pyrin and HIN domain family member 1                                                    | 1  | 158900586 | 158946844 | 46259   |
| PYY             | peptide YY                                                                              | 17 | 42030106  | 42081837  | 51732   |
| PZP             | PZP, alpha-2-macroglobulin like                                                         | 12 | 9301436   | 9360966   | 59531   |
| QRICH2          | glutamine rich 2                                                                        | 17 | 74270130  | 74303761  | 33632   |
| R3HCC1L         | R3H domain and coiled-coil containing 1 like                                            | 10 | 99894387  | 100004654 | 110268  |
| R3HDM1          | R3H domain containing 1                                                                 | 2  | 136289025 | 136482840 | 193816  |
| R3HDM2          | R3H domain containing 2                                                                 | 12 | 57643392  | 57824788  | 181397  |
| RAB18           | RAB18, member RAS oncogene family                                                       | 10 | 27793197  | 27831143  | 37947   |
| RAB22A          | RAB22A, member RAS oncogene family                                                      | 20 | 56884752  | 56942563  | 57812   |
| RAB25           | RAB25, member RAS oncogene family                                                       | 1  | 156030951 | 156040295 | 9345    |
| RAB27A          | RAB27A, member RAS oncogene family                                                      | 15 | 55495164  | 55611311  | 116148  |
| RAB31           | RAB31, member RAS oncogene family                                                       | 18 | 9708162   | 9862548   | 154387  |
| RAB37           | RAB37, member RAS oncogene family                                                       | 17 | 72666717  | 72743474  | 76758   |
| RAB38           | RAB38, member RAS oncogene family                                                       | 11 | 87846410  | 87908635  | 62226   |
| RAB39B          | RAB39B, member RAS oncogene family                                                      | X  | 154487526 | 154493874 | 6349    |
| RAB3A           | RAB3A, member RAS oncogene family                                                       | 19 | 18307594  | 18314884  | 7291    |
| RAB3GAP1        | RAB3 GTPase activating protein catalytic subunit 1                                      | 2  | 135809835 | 135933964 | 124130  |
| RAB3GAP2        | RAB3 GTPase activating non-catalytic protein subunit 2                                  | 1  | 220321635 | 220445796 | 124162  |
| RAB40C          | RAB40C, member RAS oncogene family                                                      | 16 | 639357    | 679272    | 39916   |
| RAB44           | RAB44, member RAS oncogene family                                                       | 6  | 36683256  | 36699870  | 16615   |
| RAB7A           | RAB7A, member RAS oncogene family                                                       | 3  | 128444965 | 128533639 | 88675   |
| RAB8A           | RAB8A, member RAS oncogene family                                                       | 19 | 16222439  | 16245044  | 22606   |
| <b>RAB9A</b>    | RAB9A, member RAS oncogene family                                                       | X  | 13707244  | 13728625  | 21382   |
| RABGAP1L        | RAB GTPase activating protein 1 like                                                    | 1  | 174128548 | 174964445 | 835898  |
| RABL3           | RAB, member of RAS oncogene family like 3                                               | 3  | 120405528 | 120461840 | 56313   |
| RAC2            | ras-related C3 botulinum toxin substrate 2 (rho family, small GTP binding protein Rac2) | 22 | 37621301  | 37640488  | 19188   |
| RAD18           | RAD18, E3 ubiquitin protein ligase                                                      | 3  | 8817088   | 9005457   | 188370  |
| RAD21           | RAD21 cohesin complex component                                                         | 8  | 117858174 | 117887105 | 28932   |
| RAD50           | RAD50 double strand break repair protein                                                | 5  | 131891711 | 131980313 | 88603   |
| RAD51           | RAD51 recombinase                                                                       | 15 | 40986972  | 41024354  | 37383   |
| RAD51B          | RAD51 paralogue B                                                                       | 14 | 68286496  | 69196935  | 910440  |
| RADIL           | Rap associating with DIL domain                                                         | 7  | 4836686   | 4923350   | 86665   |
| RAET1E-AS1      | RAET1E antisense RNA 1                                                                  | 6  | 150205567 | 150240644 | 35078   |
| RAI1            | retinoic acid induced 1                                                                 | 17 | 17584787  | 17714767  | 129981  |
| RAI14           | retinoic acid induced 14                                                                | 5  | 34656342  | 34832732  | 176391  |
| RALB            | RAS like proto-oncogene B                                                               | 2  | 120997640 | 121052289 | 54650   |
| RALBP1          | ralA binding protein 1                                                                  | 18 | 9475007   | 9538114   | 63108   |
| <b>RALGAPA1</b> | Ral GTPase activating protein catalytic alpha subunit 1                                 | 14 | 36007558  | 36278510  | 270953  |
| RALGAPA2        | Ral GTPase activating protein catalytic alpha subunit 2                                 | 20 | 20370196  | 20693131  | 322936  |
| RALGPS1         | Ral GEF with PH domain and SH3 binding motif 1                                          | 9  | 129677053 | 129985445 | 308393  |
| RALY            | RALY heterogeneous nuclear ribonucleoprotein                                            | 20 | 32581452  | 32696114  | 114663  |
| RALYL           | RALY RNA binding protein-like                                                           | 8  | 85095022  | 85834079  | 739058  |
| <b>RAMP3</b>    | receptor activity modifying protein 3                                                   | 7  | 45197390  | 45225901  | 28512   |
| RANBP17         | RAN binding protein 17                                                                  | 5  | 170288874 | 170727019 | 438146  |
| RAP1GAP2        | RAP1 GTPase activating protein 2                                                        | 17 | 2680350   | 2941033   | 260684  |
| RAP1GDS1        | Rap1 GTPase-GDP dissociation stimulator 1                                               | 4  | 99182535  | 99365012  | 182478  |
| RAP2C           | RAP2C, member of RAS oncogene family                                                    | X  | 131337053 | 131353471 | 16419   |

|              |                                                                        |    |           |           |         |
|--------------|------------------------------------------------------------------------|----|-----------|-----------|---------|
| RAPGEF1      | Rap guanine nucleotide exchange factor 1                               | 9  | 134452157 | 134615461 | 163305  |
| RAPGEF4      | Rap guanine nucleotide exchange factor 4                               | 2  | 173600002 | 173917621 | 317620  |
| RAPGEF5      | Rap guanine nucleotide exchange factor 5                               | 7  | 22157856  | 22396763  | 238908  |
| RAPGEF6      | Rap guanine nucleotide exchange factor 6                               | 5  | 130759614 | 130970929 | 211316  |
| <b>RARB</b>  | retinoic acid receptor beta                                            | 3  | 25215823  | 25639423  | 423601  |
| RARS2        | arginyl-tRNA synthetase 2, mitochondrial                               | 6  | 88224096  | 88299721  | 75626   |
| RASA2        | RAS p21 protein activator 2                                            | 3  | 141205889 | 141334184 | 128296  |
| RASA3        | RAS p21 protein activator 3                                            | 13 | 114747194 | 114898086 | 150893  |
| RASAL2       | RAS protein activator like 2                                           | 1  | 178062864 | 178448644 | 385781  |
| RASD2        | RASD family member 2                                                   | 22 | 35936915  | 35950048  | 13134   |
| RASGRF1      | Ras protein specific guanine nucleotide releasing factor 1             | 15 | 79252289  | 79383115  | 130827  |
| RASGRF2      | Ras protein specific guanine nucleotide releasing factor 2             | 5  | 80256491  | 80525975  | 269485  |
| RASGRP1      | RAS guanyl releasing protein 1                                         | 15 | 38780304  | 38857776  | 77473   |
| RASGRP3      | RAS guanyl releasing protein 3                                         | 2  | 33661391  | 33789817  | 128427  |
| RASSF3       | Ras association domain family member 3                                 | 12 | 65004293  | 65091347  | 87055   |
| RASSF4       | Ras association domain family member 4                                 | 10 | 45454855  | 45491339  | 36485   |
| RASSF5       | Ras association domain family member 5                                 | 1  | 206680879 | 206762616 | 81738   |
| RBBP6        | RB binding protein 6, ubiquitin ligase                                 | 16 | 24549014  | 24584184  | 35171   |
| RBBP7        | RB binding protein 7, chromatin remodeling factor                      | X  | 16857406  | 16888537  | 31132   |
| RBFOX1       | RNA binding protein, fox-1 homolog 1                                   | 16 | 6069095   | 7763340   | 1694246 |
| RBFOX2       | RNA binding protein, fox-1 homolog 2                                   | 22 | 36134783  | 36424473  | 289691  |
| RBFOX3       | RNA binding protein, fox-1 homolog 3                                   | 17 | 77085427  | 77613550  | 528124  |
| RBKS         | ribokinase                                                             | 2  | 28004231  | 28113965  | 109735  |
| RBL1         | RB transcriptional corepressor like 1                                  | 20 | 35624752  | 35724398  | 99647   |
| RBM18        | RNA binding motif protein 18                                           | 9  | 124999903 | 125027118 | 27216   |
| RBM26        | RNA binding motif protein 26                                           | 13 | 79885962  | 79980612  | 94651   |
| RBM27        | RNA binding motif protein 27                                           | 5  | 145583113 | 145718814 | 135702  |
| RBM33        | RNA binding motif protein 33                                           | 7  | 155437145 | 155574179 | 137035  |
| RBM4         | RNA binding motif protein 4                                            | 11 | 66384097  | 66434153  | 50057   |
| RBM47        | RNA binding motif protein 47                                           | 4  | 40425272  | 40632892  | 207621  |
| RBM6         | RNA binding motif protein 6                                            | 3  | 49977440  | 50137478  | 160039  |
| <b>RBMS1</b> | RNA binding motif single stranded interacting protein 1                | 2  | 161128662 | 161350305 | 221644  |
| RBMS3        | RNA binding motif single stranded interacting protein 3                | 3  | 29322473  | 30051886  | 729414  |
| RBP4         | retinol binding protein 4                                              | 10 | 95351444  | 95361501  | 10058   |
| RBPJ         | recombination signal binding protein for immunoglobulin kappa J region | 4  | 26165077  | 26436541  | 271465  |
| RCAN1        | regulator of calcineurin 1                                             | 21 | 35885440  | 35987441  | 102002  |
| RCAN2        | regulator of calcineurin 2                                             | 6  | 46188475  | 46459709  | 271235  |
| RCAN3        | RCAN family member 3                                                   | 1  | 24829387  | 24867530  | 38144   |
| RCC2         | regulator of chromosome condensation 2                                 | 1  | 17733256  | 17766220  | 32965   |
| RCOR1        | REST corepressor 1                                                     | 14 | 103058998 | 103196913 | 137916  |
| RCOR3        | REST corepressor 3                                                     | 1  | 211431719 | 211489727 | 58009   |
| RD3          | retinal degeneration 3                                                 | 1  | 211649864 | 211666259 | 16396   |
| RDH13        | retinol dehydrogenase 13                                               | 19 | 55550476  | 55582659  | 32184   |
| RDX          | radixin                                                                | 11 | 110045605 | 110167447 | 121843  |
| RECK         | reversion inducing cysteine rich protein with kazal motifs             | 9  | 36036430  | 36124448  | 88019   |
| <b>RECQL</b> | RecQ like helicase                                                     | 12 | 21621845  | 21654603  | 32759   |
| REEP1        | receptor accessory protein 1                                           | 2  | 86441116  | 86565206  | 124091  |
| REEP2        | receptor accessory protein 2                                           | 5  | 137774706 | 137782658 | 7953    |
| REEP3        | receptor accessory protein 3                                           | 10 | 65281123  | 65384883  | 103761  |
| REG4         | regenerating family member 4                                           | 1  | 120336641 | 120354283 | 17643   |
| REL          | REL proto-oncogene, NF-kB subunit                                      | 2  | 61108656  | 61158745  | 50090   |
| RELA         | RELA proto-oncogene, NF-kB subunit                                     | 11 | 65421067  | 65430565  | 9499    |
| RELB         | RELB proto-oncogene, NF-kB subunit                                     | 19 | 45504688  | 45541452  | 36765   |
| RELN         | reelin                                                                 | 7  | 103112231 | 103629963 | 517733  |
| REN          | renin                                                                  | 1  | 204123944 | 204135465 | 11522   |
| REPS1        | RALBP1 associated Eps domain containing 1                              | 6  | 139224630 | 139309398 | 84769   |
| REPS2        | RALBP1 associated Eps domain containing 2                              | X  | 16964814  | 17171395  | 206582  |
| RER1         | retention in endoplasmic reticulum sorting receptor 1                  | 1  | 2323267   | 2336883   | 13617   |
| RERE         | arginine-glutamic acid dipeptide repeats                               | 1  | 8412457   | 8877702   | 465246  |
| RET          | ret proto-oncogene                                                     | 10 | 43572475  | 43625799  | 53325   |
| REV3L        | REV3 like, DNA directed polymerase zeta catalytic subunit              | 6  | 111620234 | 111804918 | 184685  |
| RFC3         | replication factor C subunit 3                                         | 13 | 34392186  | 34540695  | 148510  |
| RFTN1        | raftlin, lipid raft linker 1                                           | 3  | 16355081  | 16555533  | 200453  |
| RFTN2        | raftlin family member 2                                                | 2  | 198432948 | 198540769 | 107822  |
| RFX1         | regulatory factor X1                                                   | 19 | 14072350  | 14117851  | 45502   |
| RFX2         | regulatory factor X2                                                   | 19 | 5993175   | 6199583   | 206409  |
| RFX3         | regulatory factor X3                                                   | 9  | 3218297   | 3526004   | 307708  |
| RFX6         | regulatory factor X6                                                   | 6  | 117198375 | 117253326 | 54952   |
| RFX7         | regulatory factor X7                                                   | 15 | 56379478  | 56535483  | 156006  |
| RFX8         | RFX family member 8, lacking RFX DNA binding domain                    | 2  | 102013823 | 102091165 | 77343   |
| RGPD1        | RANBP2-like and GRIP domain containing 1                               | 2  | 87135076  | 87241104  | 106029  |
| RGS12        | regulator of G protein signaling 12                                    | 4  | 3294755   | 3441640   | 146886  |
| RGS17        | regulator of G protein signaling 17                                    | 6  | 153325594 | 153452384 | 126791  |
| RGS20        | regulator of G protein signaling 20                                    | 8  | 54764368  | 54871863  | 107496  |
| RGS21        | regulator of G protein signaling 21                                    | 1  | 192286122 | 192336415 | 50294   |
| RGS22        | regulator of G protein signaling 22                                    | 8  | 100973164 | 101143496 | 170333  |

|               |                                                          |    |           |           |         |
|---------------|----------------------------------------------------------|----|-----------|-----------|---------|
| RGS4          | regulator of G protein signaling 4                       | 1  | 163038565 | 163046592 | 8028    |
| RGS5          | regulator of G protein signaling 5                       | 1  | 163080911 | 163291577 | 210667  |
| RGS6          | regulator of G protein signaling 6                       | 14 | 72399156  | 73030654  | 631499  |
| RGS7          | regulator of G protein signaling 7                       | 1  | 240931554 | 241520530 | 588977  |
| <b>RHAG</b>   | Rh-associated glycoprotein                               | 6  | 49572871  | 49604552  | 31682   |
| RHBDD2        | rhomboid domain containing 2                             | 7  | 75471920  | 75518244  | 46325   |
| RHCG          | Rh family C glycoprotein                                 | 15 | 89998680  | 90039844  | 41165   |
| RHEB          | Ras homolog enriched in brain                            | 7  | 151163098 | 151217206 | 54109   |
| RHOA          | ras homolog family member A                              | 3  | 49396578  | 49450431  | 53854   |
| RHOBTB1       | Rho related BTB domain containing 1                      | 10 | 62629196  | 62761198  | 132003  |
| RHOJ          | ras homolog family member J                              | 14 | 63670832  | 63759937  | 89106   |
| RHOQ          | ras homolog family member Q                              | 2  | 46768945  | 46810260  | 41316   |
| RHOU          | ras homolog family member U                              | 1  | 228870824 | 228882416 | 11593   |
| RIC8B         | RIC8 guanine nucleotide exchange factor B                | 12 | 107168373 | 107283090 | 114718  |
| RICTOR        | RPTOR independent companion of MTOR complex 2            | 5  | 38938021  | 39074510  | 136490  |
| RIMS1         | regulating synaptic membrane exocytosis 1                | 6  | 72596406  | 73112845  | 516440  |
| <b>RIMS2</b>  | regulating synaptic membrane exocytosis 2                | 8  | 104512976 | 105268322 | 755347  |
| RIMS4         | regulating synaptic membrane exocytosis 4                | 20 | 43380449  | 43438979  | 58531   |
| RIOK2         | RIO kinase 2                                             | 5  | 96496571  | 96518964  | 22394   |
| RIT2          | Ras like without CAAX 2                                  | 18 | 40323192  | 40695657  | 372466  |
| RLF           | rearranged L-myc fusion                                  | 1  | 40627045  | 40706593  | 79549   |
| <b>RNASE2</b> | ribonuclease A family member 2                           | 14 | 21423611  | 21424595  | 985     |
| RNASEH2A      | ribonuclease H2 subunit A                                | 19 | 12917394  | 12924452  | 7059    |
| RNASEH2B      | ribonuclease H2 subunit B                                | 13 | 51483814  | 51544592  | 60779   |
| RNASEH2B-AS1  | RNASEH2B antisense RNA 1                                 | 13 | 51450822  | 51484848  | 34027   |
| RNASEH2C      | ribonuclease H2 subunit C                                | 11 | 65482367  | 65488418  | 6052    |
| RNF10         | ring finger protein 10                                   | 12 | 120971283 | 121015397 | 44115   |
| RNF103-CHMP3  | RNF103-CHMP3 readthrough                                 | 2  | 86732791  | 86948245  | 215455  |
| RNF11         | ring finger protein 11                                   | 1  | 51701943  | 51739127  | 37185   |
| RNF113A       | ring finger protein 113A                                 | X  | 119004497 | 119005791 | 1295    |
| RNF114        | ring finger protein 114                                  | 20 | 48552948  | 48570429  | 17482   |
| RNF123        | ring finger protein 123                                  | 3  | 49726932  | 49758962  | 32031   |
| RNF128        | ring finger protein 128, E3 ubiquitin protein ligase     | X  | 105937024 | 106040223 | 103200  |
| RNF130        | ring finger protein 130                                  | 5  | 179338651 | 179499118 | 160468  |
| RNF135        | ring finger protein 135                                  | 17 | 29295803  | 29326929  | 31127   |
| RNF138        | ring finger protein 138                                  | 18 | 29671818  | 29711524  | 39707   |
| RNF145        | ring finger protein 145                                  | 5  | 158584417 | 158637061 | 52645   |
| RNF149        | ring finger protein 149                                  | 2  | 101887681 | 101925163 | 37483   |
| RNF152        | ring finger protein 152                                  | 18 | 59475296  | 59561480  | 86185   |
| RNF17         | ring finger protein 17                                   | 13 | 25338290  | 25454059  | 115770  |
| RNF170        | ring finger protein 170                                  | 8  | 42704780  | 42752433  | 47654   |
| RNF180        | ring finger protein 180                                  | 5  | 63461671  | 63668696  | 207026  |
| RNF185        | ring finger protein 185                                  | 22 | 31556168  | 31603005  | 46838   |
| <b>RNF19A</b> | ring finger protein 19A, RBR E3 ubiquitin protein ligase | 8  | 101269288 | 101348446 | 79159   |
| RNF19B        | ring finger protein 19B                                  | 1  | 33402046  | 33430286  | 28241   |
| RNF217        | ring finger protein 217                                  | 6  | 125283691 | 125413779 | 130089  |
| RNF219-AS1    | RNF219 antisense RNA 1                                   | 13 | 78493824  | 79191463  | 697640  |
| RNF31         | ring finger protein 31                                   | 14 | 24615892  | 24629870  | 13979   |
| RNF32         | ring finger protein 32                                   | 7  | 156432975 | 156469824 | 36850   |
| RNF41         | ring finger protein 41                                   | 12 | 56598285  | 56615717  | 17433   |
| RNF43         | ring finger protein 43                                   | 17 | 56429861  | 56494956  | 65096   |
| RNFT2         | ring finger protein, transmembrane 2                     | 12 | 117176096 | 117291436 | 115341  |
| <b>RNGTT</b>  | RNA guanylyltransferase and 5'-phosphatase               | 6  | 89319985  | 89673348  | 353364  |
| RNLS          | renalase, FAD dependent amine oxidase                    | 10 | 90033621  | 90344287  | 310667  |
| RNU5F-1       | RNA, U5F small nuclear 1                                 | 1  | 45187458  | 45187574  | 117     |
| RNU6-19P      | RNA, U6 small nuclear 19, pseudogene                     | 15 | 65845419  | 65845525  | 107     |
| RNU6-53P      | RNA, U6 small nuclear 53, pseudogene                     | 13 | 29277839  | 29277944  | 106     |
| RNU6-71P      | RNA, U6 small nuclear 71, pseudogene                     | 13 | 36841305  | 36841411  | 107     |
| RNU6-83P      | RNA, U6 small nuclear 83, pseudogene                     | 13 | 99677488  | 99677599  | 112     |
| ROBO1         | roundabout guidance receptor 1                           | 3  | 78646390  | 79816965  | 1170576 |
| ROBO2         | roundabout guidance receptor 2                           | 3  | 75955846  | 77699115  | 1743270 |
| ROCK1         | Rho associated coiled-coil containing protein kinase 1   | 18 | 18526867  | 18691812  | 164946  |
| ROCK2         | Rho associated coiled-coil containing protein kinase 2   | 2  | 11319887  | 11488456  | 168570  |
| ROGDI         | rogdi homolog                                            | 16 | 4846969   | 4852951   | 5983    |
| ROR1          | receptor tyrosine kinase like orphan receptor 1          | 1  | 64239693  | 64647181  | 407489  |
| ROR2          | receptor tyrosine kinase like orphan receptor 2          | 9  | 94325373  | 94712444  | 387072  |
| RORA          | RAR related orphan receptor A                            | 15 | 60780483  | 61521518  | 741036  |
| RORB          | RAR related orphan receptor B                            | 9  | 77112281  | 77308093  | 195813  |
| RORC          | RAR related orphan receptor C                            | 1  | 151778547 | 151804348 | 25802   |
| ROS1          | ROS proto-oncogene 1, receptor tyrosine kinase           | 6  | 117609463 | 117747018 | 137556  |
| RPA2          | replication protein A2                                   | 1  | 28218035  | 28241257  | 23223   |
| RPGRIP1L      | RPGRIP1 like                                             | 16 | 53631595  | 53737850  | 106256  |
| RPH3A         | rabphilin 3A                                             | 12 | 113008184 | 113336686 | 328503  |
| RPN1          | ribophorin I                                             | 3  | 128338817 | 128399918 | 61102   |
| RPRD1A        | regulation of nuclear pre-mRNA domain containing 1A      | 18 | 33564350  | 33647539  | 83190   |
| RPS23         | ribosomal protein S23                                    | 5  | 81569177  | 81574396  | 5220    |
| RPS25         | ribosomal protein S25                                    | 11 | 118886422 | 118889401 | 2980    |



|              |                                                                                 |    |           |           |         |
|--------------|---------------------------------------------------------------------------------|----|-----------|-----------|---------|
| RPS6KA2      | ribosomal protein S6 kinase A2                                                  | 6  | 166822852 | 167319939 | 497088  |
| RPS6KA5      | ribosomal protein S6 kinase A5                                                  | 14 | 91336799  | 91526980  | 190182  |
| RPS6KA6      | ribosomal protein S6 kinase A6                                                  | X  | 83318984  | 83442933  | 123950  |
| RPS6KC1      | ribosomal protein S6 kinase C1                                                  | 1  | 213224589 | 213448116 | 223528  |
| RPTOR        | regulatory associated protein of MTOR complex 1                                 | 17 | 78518619  | 78940171  | 421553  |
| RRAGC        | Ras related GTP binding C                                                       | 1  | 39303870  | 39325495  | 21626   |
| RRAGD        | Ras related GTP binding D                                                       | 6  | 90074355  | 90121989  | 47635   |
| RRAS2        | related RAS viral (r-ras) oncogene homolog 2                                    | 11 | 14299472  | 14386052  | 86581   |
| RRP15        | ribosomal RNA processing 15 homolog                                             | 1  | 218458629 | 218511325 | 52697   |
| RRP8         | ribosomal RNA processing 8, methyltransferase, homolog (yeast)                  | 11 | 6616305   | 6624850   | 8546    |
| RS1          | retinoschisin 1                                                                 | X  | 18658030  | 18690229  | 32200   |
| RSF1         | remodeling and spacing factor 1                                                 | 11 | 77371041  | 77532063  | 161023  |
| RSPO2        | R-spondin 2                                                                     | 8  | 108911544 | 109095913 | 184370  |
| RSPRY1       | ring finger and SPRY domain containing 1                                        | 16 | 57220049  | 57274387  | 54339   |
| RSRC1        | arginine and serine rich coiled-coil 1                                          | 3  | 157823644 | 158263519 | 439876  |
| RSU1         | Ras suppressor protein 1                                                        | 10 | 16632610  | 16859527  | 226918  |
| RTN1         | reticulon 1                                                                     | 14 | 60062694  | 60337684  | 274991  |
| RTN2         | reticulon 2                                                                     | 19 | 45988547  | 46000319  | 11773   |
| RTN3         | reticulon 3                                                                     | 11 | 63448918  | 63527363  | 78446   |
| RUFY2        | RUN and FYVE domain containing 2                                                | 10 | 70100864  | 70167051  | 66188   |
| RUFY3        | RUN and FYVE domain containing 3                                                | 4  | 71569921  | 71673032  | 103112  |
| RUNX1        | runt related transcription factor 1                                             | 21 | 36160098  | 37376965  | 1216868 |
| RUNX1T1      | RUNX1 translocation partner 1                                                   | 8  | 92967203  | 93115514  | 148312  |
| RUNX2        | runt related transcription factor 2                                             | 6  | 45295894  | 45632086  | 336193  |
| RUNX3        | runt related transcription factor 3                                             | 1  | 25226002  | 25291612  | 65611   |
| RXFP1        | relaxin/insulin like family peptide receptor 1                                  | 4  | 159236463 | 159574524 | 338062  |
| RXRA         | retinoid X receptor alpha                                                       | 9  | 137208944 | 137332431 | 123488  |
| RXRB         | retinoid X receptor beta                                                        | 6  | 33161365  | 33168630  | 7266    |
| RXRG         | retinoid X receptor gamma                                                       | 1  | 165370159 | 165414433 | 44275   |
| RYK          | receptor-like tyrosine kinase                                                   | 3  | 133784147 | 133969689 | 185543  |
| RYR2         | ryanodine receptor 2                                                            | 1  | 237205505 | 237997288 | 791784  |
| RYR3         | ryanodine receptor 3                                                            | 15 | 33603163  | 34158303  | 555141  |
| S100A10      | S100 calcium binding protein A10                                                | 1  | 151955391 | 151966866 | 11476   |
| S100A14      | S100 calcium binding protein A14                                                | 1  | 153586731 | 153589462 | 2732    |
| S100B        | S100 calcium binding protein B                                                  | 21 | 48018875  | 48025121  | 6247    |
| S100Z        | S100 calcium binding protein Z                                                  | 5  | 76145826  | 76217475  | 71650   |
| SACM1L       | SAC1 suppressor of actin mutations 1 like (yeast)                               | 3  | 45730548  | 45786916  | 56369   |
| SACS         | sacsin molecular chaperone                                                      | 13 | 23902965  | 24007841  | 104877  |
| SAFB2        | scaffold attachment factor B2                                                   | 19 | 5587010   | 5624057   | 37048   |
| SAMD12       | sterile alpha motif domain containing 12                                        | 8  | 119201698 | 119634234 | 432537  |
| SAMD3        | sterile alpha motif domain containing 3                                         | 6  | 130465460 | 130686570 | 221111  |
| SAMD4A       | sterile alpha motif domain containing 4A                                        | 14 | 55033815  | 55260033  | 226219  |
| SAMHD1       | SAM and HD domain containing deoxynucleoside triphosphate triphosphohydrolase 1 | 20 | 35518632  | 35580246  | 61615   |
| SAMSN1       | SAM domain, SH3 domain and nuclear localization signals 1                       | 21 | 15857549  | 15955723  | 98175   |
| SAP130       | Sin3A associated protein 130                                                    | 2  | 128698791 | 128785694 | 86904   |
| SAP30        | Sin3A associated protein 30                                                     | 4  | 174291120 | 174298683 | 7564    |
| SAP30BP      | SAP30 binding protein                                                           | 17 | 73663196  | 73704142  | 40947   |
| SAR1A        | secretion associated Ras related GTPase 1A                                      | 10 | 71907045  | 71930279  | 23235   |
| <b>SARM1</b> | sterile alpha and TIR motif containing 1                                        | 17 | 26691378  | 26728065  | 36688   |
| SASH1        | SAM and SH3 domain containing 1                                                 | 6  | 148593440 | 148873186 | 279747  |
| SATB1        | SATB homeobox 1                                                                 | 3  | 18386879  | 18487080  | 100202  |
| SATB2        | SATB homeobox 2                                                                 | 2  | 200134223 | 200335989 | 201767  |
| SBF2         | SET binding factor 2                                                            | 11 | 9800214   | 10315754  | 515541  |
| SBF2-AS1     | SBF2 antisense RNA 1                                                            | 11 | 9779839   | 9832866   | 53028   |
| SBNO2        | strawberry notch homolog 2                                                      | 19 | 1107636   | 1174282   | 66647   |
| SC5D         | sterol-C5-desaturase                                                            | 11 | 121163162 | 121179403 | 16242   |
| SCAF1        | SR-related CTD associated factor 1                                              | 19 | 50145382  | 50161899  | 16518   |
| SCAF11       | SR-related CTD associated factor 11                                             | 12 | 46312914  | 46385903  | 72990   |
| SCAF4        | SR-related CTD associated factor 4                                              | 21 | 33043346  | 33104388  | 61043   |
| SCAF8        | SR-related CTD associated factor 8                                              | 6  | 155054459 | 155155192 | 100734  |
| SCAI         | suppressor of cancer cell invasion                                              | 9  | 127704887 | 127905785 | 200899  |
| SCAP         | SREBF chaperone                                                                 | 3  | 47455203  | 47518616  | 63414   |
| SCAPER       | S-phase cyclin A associated protein in the ER                                   | 15 | 76640526  | 77197785  | 557260  |
| SCARB1       | scavenger receptor class B member 1                                             | 12 | 125261402 | 125367214 | 105813  |
| SCARB2       | scavenger receptor class B member 2                                             | 4  | 77079890  | 77135046  | 55157   |
| SCCPDH       | saccharopine dehydrogenase (putative)                                           | 1  | 246887349 | 246931439 | 44091   |
| SCD          | stearoyl-CoA desaturase                                                         | 10 | 102106881 | 102124591 | 17711   |
| SCEL         | sciellin                                                                        | 13 | 78109809  | 78219398  | 109590  |
| SCFD1        | sec1 family domain containing 1                                                 | 14 | 31091318  | 31205018  | 113701  |
| SCFD2        | sec1 family domain containing 2                                                 | 4  | 53739149  | 54232242  | 493094  |
| SCG5         | secretogranin V                                                                 | 15 | 32933877  | 32989299  | 55423   |
| SCGB1D1      | secretoglobulin family 1D member 1                                              | 11 | 61957688  | 61961011  | 3324    |
| SCLT1        | sodium channel and clathrin linker 1                                            | 4  | 129786076 | 130014764 | 228689  |
| SCN10A       | sodium voltage-gated channel alpha subunit 10                                   | 3  | 38738293  | 38835501  | 97209   |
| SCN1A        | sodium voltage-gated channel alpha subunit 1                                    | 2  | 166845670 | 166984523 | 138854  |
| SCN1B        | sodium voltage-gated channel beta subunit 1                                     | 19 | 35521588  | 35531352  | 9765    |

|               |                                                                     |    |           |           |         |
|---------------|---------------------------------------------------------------------|----|-----------|-----------|---------|
| SCN2A         | sodium voltage-gated channel alpha subunit 2                        | 2  | 166095912 | 166248818 | 152907  |
| SCN3A         | sodium voltage-gated channel alpha subunit 3                        | 2  | 165944032 | 166060577 | 116546  |
| <b>SCN7A</b>  | sodium voltage-gated channel alpha subunit 7                        | 2  | 167260083 | 167350757 | 90675   |
| SCN8A         | sodium voltage-gated channel alpha subunit 8                        | 12 | 51984050  | 52206648  | 222599  |
| SCN9A         | sodium voltage-gated channel alpha subunit 9                        | 2  | 167051695 | 167232503 | 180809  |
| SCNN1B        | sodium channel epithelial 1 beta subunit                            | 16 | 23289552  | 23392620  | 103069  |
| SCOC          | short coiled-coil protein                                           | 4  | 141178440 | 141306880 | 128441  |
| SCP2          | sterol carrier protein 2                                            | 1  | 53392901  | 53517375  | 124475  |
| SCUBE1        | signal peptide, CUB domain and EGF like domain containing 1         | 22 | 43593289  | 43739394  | 146106  |
| SCUBE2        | signal peptide, CUB domain and EGF like domain containing 2         | 11 | 9041071   | 9159661   | 118591  |
| SCUBE3        | signal peptide, CUB domain and EGF like domain containing 3         | 6  | 35182190  | 35220856  | 38667   |
| SDC1          | syndecan 1                                                          | 2  | 20400558  | 20425194  | 24637   |
| SDCCAG8       | serologically defined colon cancer antigen 8                        | 1  | 243419320 | 243663394 | 244075  |
| <b>SDK1</b>   | sidekick cell adhesion molecule 1                                   | 7  | 3341080   | 4308632   | 967553  |
| SDK2          | sidekick cell adhesion molecule 2                                   | 17 | 71330523  | 71640228  | 309706  |
| SDR16C6P      | short chain dehydrogenase/reductase family 16C member 6, pseudogene | 8  | 57285623  | 57307924  | 22302   |
| SEC14L1       | SEC14 like lipid binding 1                                          | 17 | 75082798  | 75213179  | 130382  |
| SEC14L2       | SEC14 like lipid binding 2                                          | 22 | 30792846  | 30821305  | 28460   |
| SEC16A        | SEC16 homolog A, endoplasmic reticulum export factor                | 9  | 139334549 | 139372141 | 37593   |
| SEC22C        | SEC22 homolog C, vesicle trafficking protein                        | 3  | 42589461  | 42642572  | 53112   |
| SEC23A        | Sec23 homolog A, coat complex II component                          | 14 | 39501123  | 39578850  | 77728   |
| SEC24C        | SEC24 homolog C, COPII coat complex component                       | 10 | 75504120  | 75531919  | 27800   |
| SEC24D        | SEC24 homolog D, COPII coat complex component                       | 4  | 119643978 | 119759838 | 115861  |
| SEL1L2        | SEL1L2 ERAD E3 ligase adaptor subunit                               | 20 | 13829893  | 13977089  | 147197  |
| <b>SELL</b>   | selectin L                                                          | 1  | 169659808 | 169680839 | 21032   |
| SELP          | selectin P                                                          | 1  | 169558087 | 169599431 | 41345   |
| SEMA3A        | semaphorin 3A                                                       | 7  | 83585093  | 84122040  | 536948  |
| SEMA3E        | semaphorin 3E                                                       | 7  | 82993222  | 83278326  | 285105  |
| SEMA4D        | semaphorin 4D                                                       | 9  | 91975702  | 92113045  | 137344  |
| SEMA5A        | semaphorin 5A                                                       | 5  | 9035138   | 9546187   | 511050  |
| <b>SEMA6A</b> | semaphorin 6A                                                       | 5  | 115779312 | 115910630 | 131319  |
| SEMA6D        | semaphorin 6D                                                       | 15 | 47476298  | 48066420  | 590123  |
| SENP1         | SUMO1/sentrin specific peptidase 1                                  | 12 | 48436681  | 48500091  | 63411   |
| SENP6         | SUMO1/sentrin specific peptidase 6                                  | 6  | 76311225  | 76427997  | 116773  |
| SEPSECS       | Sep (O-phosphoserine) tRNA:Sec (selenocysteine) tRNA synthase       | 4  | 25121627  | 25162204  | 40578   |
| SEPT3         | septin 3                                                            | 22 | 42372276  | 42394225  | 21950   |
| SEPT9         | septin 9                                                            | 17 | 75276651  | 75496678  | 220028  |
| SERAC1        | serine active site containing 1                                     | 6  | 158530536 | 158589312 | 58777   |
| SERGEF        | secretion regulating guanine nucleotide exchange factor             | 11 | 17809595  | 18034709  | 225115  |
| SERINC5       | serine incorporator 5                                               | 5  | 79407050  | 79551898  | 144849  |
| SERPINA1      | serpin family A member 1                                            | 14 | 94843084  | 94857030  | 13947   |
| SERPINA13P    | serpin family A member 13, pseudogene                               | 14 | 95107062  | 95113331  | 6270    |
| SERPINA3      | serpin family A member 3                                            | 14 | 95078714  | 95090392  | 11679   |
| SERPINA7      | serpin family A member 7                                            | X  | 105277197 | 105282729 | 5533    |
| SERPINB1      | serpin family B member 1                                            | 6  | 2832566   | 2842240   | 9675    |
| SERPINB5      | serpin family B member 5                                            | 18 | 61143994  | 61172318  | 28325   |
| SERPINB7      | serpin family B member 7                                            | 18 | 61420169  | 61472604  | 52436   |
| SERPINE1      | serpin family E member 1                                            | 7  | 100770370 | 100782547 | 12178   |
| SERPINE2      | serpin family E member 2                                            | 2  | 224839829 | 224904036 | 64208   |
| SERPINE3      | serpin family E member 3                                            | 13 | 51909909  | 51938871  | 28963   |
| SERPINF2      | serpin family F member 2                                            | 17 | 1646130   | 1658562   | 12433   |
| SERTAD4       | SERTA domain containing 4                                           | 1  | 210406144 | 210419976 | 13833   |
| SESN1         | sestrin 1                                                           | 6  | 109307640 | 109416022 | 108383  |
| SESTD1        | SEC14 and spectrin domain containing 1                              | 2  | 179966419 | 180129517 | 163099  |
| SET           | SET nuclear proto-oncogene                                          | 9  | 131445703 | 131458679 | 12977   |
| SETBP1        | SET binding protein 1                                               | 18 | 42260138  | 42648475  | 388338  |
| SETD2         | SET domain containing 2                                             | 3  | 47057919  | 47205457  | 147539  |
| SETD3         | SET domain containing 3                                             | 14 | 99864083  | 99947216  | 83134   |
| <b>SETX</b>   | senataxin                                                           | 9  | 135136743 | 135230372 | 93630   |
| SEZ6L         | seizure related 6 homolog like                                      | 22 | 26565440  | 26779562  | 214123  |
| SEZ6L2        | seizure related 6 homolog like 2                                    | 16 | 29882480  | 29910868  | 28389   |
| SF1           | splicing factor 1                                                   | 11 | 64532078  | 64546258  | 14181   |
| SF3A1         | splicing factor 3a subunit 1                                        | 22 | 30727977  | 30752936  | 24960   |
| SF3B1         | splicing factor 3b subunit 1                                        | 2  | 198254508 | 198299815 | 45308   |
| SFMBT2        | Scm-like with four mbt domains 2                                    | 10 | 7200586   | 7453450   | 252865  |
| SFRP1         | secreted frizzled related protein 1                                 | 8  | 41119481  | 41167016  | 47536   |
| SFRP2         | secreted frizzled related protein 2                                 | 4  | 154701744 | 154710272 | 8529    |
| SFSWAP        | splicing factor SWAP homolog                                        | 12 | 132195626 | 132284282 | 88657   |
| SFTA3         | surfactant associated 3                                             | 14 | 36942493  | 36983034  | 40542   |
| SFTPA1        | surfactant protein A1                                               | 10 | 81370695  | 81375196  | 4502    |
| SFXN5         | sideroflexin 5                                                      | 2  | 73169165  | 73302747  | 133583  |
| SGCA          | sarcoglycan alpha                                                   | 17 | 48241575  | 48253292  | 11718   |
| SGCB          | sarcoglycan beta                                                    | 4  | 52886872  | 52904648  | 17777   |
| SGCD          | sarcoglycan delta                                                   | 5  | 155297354 | 156194799 | 897446  |
| SGCG          | sarcoglycan gamma                                                   | 13 | 23755091  | 23899304  | 144214  |
| SGCZ          | sarcoglycan zeta                                                    | 8  | 13947373  | 15095848  | 1148476 |

|                |                                                               |    |           |           |        |
|----------------|---------------------------------------------------------------|----|-----------|-----------|--------|
| SGK1           | serum/glucocorticoid regulated kinase 1                       | 6  | 134490384 | 134639250 | 148867 |
| SGMS1          | sphingomyelin synthase 1                                      | 10 | 52065360  | 52384923  | 319564 |
| SGPL1          | sphingosine-1-phosphate lyase 1                               | 10 | 72575717  | 72640930  | 65214  |
| SGPP1          | sphingosine-1-phosphate phosphatase 1                         | 14 | 64150932  | 64194757  | 43826  |
| SGTB           | small glutamine rich tetratricopeptide repeat containing beta | 5  | 64961755  | 65018862  | 57108  |
| SH2B1          | SH2B adaptor protein 1                                        | 16 | 28857921  | 28885526  | 27606  |
| SH2D2A         | SH2 domain containing 2A                                      | 1  | 156776035 | 156786654 | 10620  |
| SH2D4A         | SH2 domain containing 4A                                      | 8  | 19171128  | 19253729  | 82602  |
| SH2D4B         | SH2 domain containing 4B                                      | 10 | 82297658  | 82406316  | 108659 |
| SH3GL2         | SH3 domain containing GRB2 like 2, endophilin A1              | 9  | 17579080  | 17797127  | 218048 |
| SH3GL3         | SH3 domain containing GRB2 like 3, endophilin A3              | 15 | 84115980  | 84287495  | 171516 |
| SH3GLB2        | SH3 domain containing GRB2 like, endophilin B2                | 9  | 131769315 | 131790582 | 21268  |
| SH3KBP1        | SH3 domain containing kinase binding protein 1                | X  | 19552093  | 19905719  | 353627 |
| SH3RF1         | SH3 domain containing ring finger 1                           | 4  | 170015407 | 170192256 | 176850 |
| SH3RF2         | SH3 domain containing ring finger 2                           | 5  | 145316142 | 145461354 | 145213 |
| SH3RF3         | SH3 domain containing ring finger 3                           | 2  | 109745804 | 110262207 | 516404 |
| SH3TC2         | SH3 domain and tetratricopeptide repeats 2                    | 5  | 148303202 | 148442726 | 139525 |
| SHANK2         | SH3 and multiple ankyrin repeat domains 2                     | 11 | 70313961  | 70963623  | 649663 |
| SHC3           | SHC adaptor protein 3                                         | 9  | 91628060  | 91793682  | 165623 |
| SHC4           | SHC adaptor protein 4                                         | 15 | 49115932  | 49255641  | 139710 |
| SHCBP1L        | SHC binding and spindle associated 1 like                     | 1  | 182869000 | 182922660 | 53661  |
| SHH            | sonic hedgehog                                                | 7  | 155592680 | 155604967 | 12288  |
| SHISA6         | shisa family member 6                                         | 17 | 11144580  | 11467380  | 322801 |
| SHISA9         | shisa family member 9                                         | 16 | 12995477  | 13334272  | 338796 |
| SHQ1           | SHQ1, H/ACA ribonucleoprotein assembly factor                 | 3  | 72798428  | 72911065  | 112638 |
| SHROOM2        | shroom family member 2                                        | X  | 9754496   | 9917483   | 162988 |
| SHROOM3        | shroom family member 3                                        | 4  | 77356253  | 77704406  | 348154 |
| SHROOM4        | shroom family member 4                                        | X  | 50334647  | 50557302  | 222656 |
| SIAH2          | siah E3 ubiquitin protein ligase 2                            | 3  | 150458914 | 150481264 | 22351  |
| SIGLEC8        | sialic acid binding Ig like lectin 8                          | 19 | 51954101  | 51961710  | 7610   |
| SIGLEC9        | sialic acid binding Ig like lectin 9                          | 19 | 51628165  | 51639908  | 11744  |
| <b>SIGMAR1</b> | sigma non-opioid intracellular receptor 1                     | 9  | 34634719  | 34637806  | 3088   |
| SIK3           | SIK family kinase 3                                           | 11 | 116714118 | 116969153 | 255036 |
| SIL1           | SIL1 nucleotide exchange factor                               | 5  | 138282409 | 138629246 | 346838 |
| SIN3A          | SIN3 transcription regulator family member A                  | 15 | 75661720  | 75748183  | 86464  |
| SIPA1L1        | signal induced proliferation associated 1 like 1              | 14 | 71787166  | 72207946  | 420781 |
| SIPA1L3        | signal induced proliferation associated 1 like 3              | 19 | 38397868  | 38699012  | 301145 |
| SIRPG          | signal regulatory protein gamma                               | 20 | 1609798   | 1638425   | 28628  |
| SIRT1          | sirtuin 1                                                     | 10 | 69644427  | 69678147  | 33721  |
| SIRT3          | sirtuin 3                                                     | 11 | 215458    | 236931    | 21474  |
| SKA2           | spindle and kinetochore associated complex subunit 2          | 17 | 57187312  | 57232630  | 45319  |
| SKAP1          | src kinase associated phosphoprotein 1                        | 17 | 46210802  | 46507637  | 296836 |
| SKAP2          | src kinase associated phosphoprotein 2                        | 7  | 26706681  | 27034858  | 328178 |
| SKOR2          | SKI family transcriptional corepressor 2                      | 18 | 44746293  | 44775554  | 29262  |
| SKP1           | S-phase kinase associated protein 1                           | 5  | 133484633 | 133512729 | 28097  |
| SLC10A1        | solute carrier family 10 member 1                             | 14 | 70242134  | 70264006  | 21873  |
| SLC11A2        | solute carrier family 11 member 2                             | 12 | 51373184  | 51422349  | 49166  |
| SLC12A2        | solute carrier family 12 member 2                             | 5  | 127419458 | 127525380 | 105923 |
| SLC12A6        | solute carrier family 12 member 6                             | 15 | 34525460  | 34630261  | 104802 |
| SLC13A3        | solute carrier family 13 member 3                             | 20 | 45186463  | 45304714  | 118252 |
| SLC14A2        | solute carrier family 14 member 2                             | 18 | 42792960  | 43263072  | 470113 |
| SLC15A5        | solute carrier family 15 member 5                             | 12 | 16341419  | 16430619  | 89201  |
| SLC16A10       | solute carrier family 16 member 10                            | 6  | 111408781 | 111552397 | 143617 |
| SLC16A12       | solute carrier family 16 member 12                            | 10 | 91190051  | 91316398  | 126348 |
| SLC16A13       | solute carrier family 16 member 13                            | 17 | 6939394   | 6943440   | 4047   |
| SLC16A14       | solute carrier family 16 member 14                            | 2  | 230899698 | 230933715 | 34018  |
| SLC16A4        | solute carrier family 16 member 4                             | 1  | 110905470 | 110933704 | 28235  |
| SLC17A3        | solute carrier family 17 member 3                             | 6  | 25833294  | 25882514  | 49221  |
| SLC17A5        | solute carrier family 17 member 5                             | 6  | 74303102  | 74363878  | 60777  |
| SLC17A7        | solute carrier family 17 member 7                             | 19 | 49932658  | 49945617  | 12960  |
| SLC18A2        | solute carrier family 18 member A2                            | 10 | 119000604 | 119038941 | 38338  |
| SLC19A3        | solute carrier family 19 member 3                             | 2  | 228549926 | 228582728 | 32803  |
| <b>SLC1A2</b>  | solute carrier family 1 member 2                              | 11 | 35272753  | 35441610  | 168858 |
| SLC1A3         | solute carrier family 1 member 3                              | 5  | 36606457  | 36688436  | 81980  |
| SLC20A2        | solute carrier family 20 member 2                             | 8  | 42273993  | 42397069  | 123077 |
| SLC22A10       | solute carrier family 22 member 10                            | 11 | 62905339  | 63137190  | 231852 |
| SLC22A2        | solute carrier family 22 member 2                             | 6  | 160592093 | 160698670 | 106578 |
| SLC22A23       | solute carrier family 22 member 23                            | 6  | 3269196   | 3457256   | 188061 |
| SLC22A3        | solute carrier family 22 member 3                             | 6  | 160769300 | 160876014 | 106715 |
| SLC22A8        | solute carrier family 22 member 8                             | 11 | 62756626  | 62783311  | 26686  |
| SLC23A2        | solute carrier family 23 member 2                             | 20 | 4833002   | 4990939   | 157938 |
| SLC24A2        | solute carrier family 24 member 2                             | 9  | 19507450  | 19786926  | 279477 |
| SLC24A3        | solute carrier family 24 member 3                             | 20 | 19193290  | 19703581  | 510292 |
| SLC25A13       | solute carrier family 25 member 13                            | 7  | 95749532  | 95951459  | 201928 |
| SLC25A15       | solute carrier family 25 member 15                            | 13 | 41363548  | 41384247  | 20700  |
| SLC25A19       | solute carrier family 25 member 19                            | 17 | 73269073  | 73285591  | 16519  |
| SLC25A21       | solute carrier family 25 member 21                            | 14 | 37147636  | 37642071  | 494436 |

|                 |                                                            |    |           |           |        |
|-----------------|------------------------------------------------------------|----|-----------|-----------|--------|
| SLC25A22        | solute carrier family 25 member 22                         | 11 | 790475    | 798316    | 7842   |
| SLC25A25        | solute carrier family 25 member 25                         | 9  | 130830480 | 130871524 | 41045  |
| SLC25A27        | solute carrier family 25 member 27                         | 6  | 46620678  | 46645930  | 25253  |
| <b>SLC25A43</b> | solute carrier family 25 member 43                         | X  | 118533023 | 118588441 | 55419  |
| SLC25A46        | solute carrier family 25 member 46                         | 5  | 110073837 | 110100857 | 27021  |
| SLC25A48        | solute carrier family 25 member 48                         | 5  | 135170338 | 135224326 | 53989  |
| SLC26A4         | solute carrier family 26 member 4                          | 7  | 107301080 | 107358254 | 57175  |
| SLC26A7         | solute carrier family 26 member 7                          | 8  | 92221722  | 92410378  | 188657 |
| SLC26A8         | solute carrier family 26 member 8                          | 6  | 35911291  | 35992645  | 81355  |
| SLC27A6         | solute carrier family 27 member 6                          | 5  | 127873706 | 128369335 | 495630 |
| SLC2A1          | solute carrier family 2 member 1                           | 1  | 43391052  | 43424530  | 33479  |
| SLC2A10         | solute carrier family 2 member 10                          | 20 | 45338126  | 45364965  | 26840  |
| SLC2A13         | solute carrier family 2 member 13                          | 12 | 40148823  | 40499891  | 351069 |
| SLC2A9          | solute carrier family 2 member 9                           | 4  | 9772777   | 10056560  | 283784 |
| SLC30A6         | solute carrier family 30 member 6                          | 2  | 32390933  | 32449448  | 58516  |
| SLC33A1         | solute carrier family 33 member 1                          | 3  | 155538813 | 155572218 | 33406  |
| SLC35A1         | solute carrier family 35 member A1                         | 6  | 88180341  | 88222054  | 41714  |
| SLC35A2         | solute carrier family 35 member A2                         | X  | 48760459  | 48769235  | 8777   |
| SLC35A3         | solute carrier family 35 member A3                         | 1  | 100435345 | 100492535 | 57191  |
| SLC35C1         | solute carrier family 35 member C1                         | 11 | 45825623  | 45834566  | 8944   |
| SLC35F1         | solute carrier family 35 member F1                         | 6  | 118228689 | 118638839 | 410151 |
| SLC35F3         | solute carrier family 35 member F3                         | 1  | 234040679 | 234460262 | 419584 |
| SLC35F4         | solute carrier family 35 member F4                         | 14 | 58030640  | 58448912  | 418273 |
| SLC37A1         | solute carrier family 37 member 1                          | 21 | 43916118  | 44001550  | 85433  |
| SLC37A3         | solute carrier family 37 member 3                          | 7  | 139993493 | 140104233 | 110741 |
| SLC38A1         | solute carrier family 38 member 1                          | 12 | 46576846  | 46663800  | 86955  |
| SLC38A11        | solute carrier family 38 member 11                         | 2  | 165752696 | 165812035 | 59340  |
| SLC38A4         | solute carrier family 38 member 4                          | 12 | 47158546  | 47226191  | 67646  |
| SLC38A6         | solute carrier family 38 member 6                          | 14 | 61447832  | 61550451  | 102620 |
| <b>SLC39A11</b> | solute carrier family 39 member 11                         | 17 | 70642088  | 71088851  | 446764 |
| SLC39A12        | solute carrier family 39 member 12                         | 10 | 18240768  | 18332221  | 91454  |
| SLC39A7         | solute carrier family 39 member 7                          | 6  | 33168222  | 33172216  | 3995   |
| SLC39A9         | solute carrier family 39 member 9                          | 14 | 69864732  | 69929105  | 64374  |
| SLC41A1         | solute carrier family 41 member 1                          | 1  | 205758221 | 205782876 | 24656  |
| SLC41A3         | solute carrier family 41 member 3                          | 3  | 125725198 | 125820404 | 95207  |
| SLC44A5         | solute carrier family 44 member 5                          | 1  | 75667816  | 76076801  | 408986 |
| SLC45A3         | solute carrier family 45 member 3                          | 1  | 205626979 | 205649587 | 22609  |
| SLC46A1         | solute carrier family 46 member 1                          | 17 | 26721661  | 26734215  | 12555  |
| SLC46A3         | solute carrier family 46 member 3                          | 13 | 29274201  | 29293107  | 18907  |
| SLC4A10         | solute carrier family 4 member 10                          | 2  | 162280843 | 162841792 | 560950 |
| SLC4A4          | solute carrier family 4 member 4                           | 4  | 72053003  | 72437804  | 384802 |
| SLC4A5          | solute carrier family 4 member 5                           | 2  | 74443369  | 74570541  | 127173 |
| SLC4A7          | solute carrier family 4 member 7                           | 3  | 27414214  | 27525911  | 111698 |
| SLC4A8          | solute carrier family 4 member 8                           | 12 | 51785101  | 51902980  | 117880 |
| SLC5A12         | solute carrier family 5 member 12                          | 11 | 26688566  | 26744974  | 56409  |
| SLC5A3          | solute carrier family 5 member 3                           | 21 | 35445870  | 35478561  | 32692  |
| SLC5A7          | solute carrier family 5 member 7                           | 2  | 108602979 | 108630450 | 27472  |
| SLC5A8          | solute carrier family 5 member 8                           | 12 | 101549271 | 101604185 | 54915  |
| SLC6A1          | solute carrier family 6 member 1                           | 3  | 11034410  | 11080933  | 46524  |
| SLC6A14         | solute carrier family 6 member 14                          | X  | 115567790 | 115592625 | 24836  |
| SLC6A16         | solute carrier family 6 member 16                          | 19 | 49792895  | 49828482  | 35588  |
| SLC6A19         | solute carrier family 6 member 19                          | 5  | 1201710   | 1225232   | 23523  |
| SLC6A2          | solute carrier family 6 member 2                           | 16 | 55689516  | 55740104  | 50589  |
| SLC6A3          | solute carrier family 6 member 3                           | 5  | 1392909   | 1445545   | 52637  |
| SLC6A4          | solute carrier family 6 member 4                           | 17 | 28521337  | 28563020  | 41684  |
| SLC6A5          | solute carrier family 6 member 5                           | 11 | 20620946  | 20680831  | 59886  |
| SLC7A1          | solute carrier family 7 member 1                           | 13 | 30083547  | 30169825  | 86279  |
| SLC7A13         | solute carrier family 7 member 13                          | 8  | 87226281  | 87333375  | 107095 |
| SLC7A14         | solute carrier family 7 member 14                          | 3  | 170177372 | 170303863 | 126492 |
| SLC8A1-AS1      | SLC8A1 antisense RNA 1                                     | 2  | 40013593  | 40482349  | 468757 |
| SLC8A3          | solute carrier family 8 member A3                          | 14 | 70510934  | 70655787  | 144854 |
| SLC9A1          | solute carrier family 9 member A1                          | 1  | 27425306  | 27493472  | 68167  |
| SLC9A6          | solute carrier family 9 member A6                          | X  | 135067598 | 135129423 | 61826  |
| SLC9A7          | solute carrier family 9 member A7                          | X  | 46464753  | 46618490  | 153738 |
| SLC9A8          | solute carrier family 9 member A8                          | 20 | 48429250  | 48508779  | 79530  |
| SLC9A9          | solute carrier family 9 member A9                          | 3  | 142984064 | 143567373 | 583310 |
| SLC9C1          | solute carrier family 9 member C1                          | 3  | 111859734 | 112013105 | 153372 |
| SLC9C2          | solute carrier family 9 member C2 (putative)               | 1  | 173469603 | 173572233 | 102631 |
| SLCO1A2         | solute carrier organic anion transporter family member 1A2 | 12 | 21417534  | 21572528  | 154995 |
| <b>SLCO1B1</b>  | solute carrier organic anion transporter family member 1B1 | 12 | 21284136  | 21392180  | 108045 |
| SLCO3A1         | solute carrier organic anion transporter family member 3A1 | 15 | 92396925  | 92715665  | 318741 |
| <b>SLCO4C1</b>  | solute carrier organic anion transporter family member 4C1 | 5  | 101569690 | 101632253 | 62564  |
| SLCO5A1         | solute carrier organic anion transporter family member 5A1 | 8  | 70579282  | 70747299  | 168018 |
| SLIT2           | slit guidance ligand 2                                     | 4  | 20254883  | 20622184  | 367302 |
| SLIT3           | slit guidance ligand 3                                     | 5  | 168088745 | 168728133 | 639389 |
| <b>SLK</b>      | STE20 like kinase                                          | 10 | 105726959 | 105788991 | 62033  |
| SLMAP           | sarcolemma associated protein                              | 3  | 57741177  | 57914895  | 173719 |

|               |                                                                                                   |    |           |           |         |
|---------------|---------------------------------------------------------------------------------------------------|----|-----------|-----------|---------|
| SMAD1         | SMAD family member 1                                                                              | 4  | 146402346 | 146479231 | 76886   |
| SMAD2         | SMAD family member 2                                                                              | 18 | 45357922  | 45457515  | 99594   |
| SMAD3         | SMAD family member 3                                                                              | 15 | 67356101  | 67487533  | 131433  |
| SMAD9         | SMAD family member 9                                                                              | 13 | 37418968  | 37494902  | 75935   |
| SMARCB1       | SWI/SNF related, matrix associated, actin dependent regulator of chromatin, subfamily b, member 1 | 22 | 24129150  | 24176703  | 47554   |
| SMARCC2       | SWI/SNF related, matrix associated, actin dependent regulator of chromatin subfamily c member 2   | 12 | 56556767  | 56583351  | 26585   |
| SMC1B         | structural maintenance of chromosomes 1B                                                          | 22 | 45739944  | 45809500  | 69557   |
| SMC3          | structural maintenance of chromosomes 3                                                           | 10 | 112327449 | 112364394 | 36946   |
| SMC4          | structural maintenance of chromosomes 4                                                           | 3  | 160117062 | 160152750 | 35689   |
| SMCHD1        | structural maintenance of chromosomes flexible hinge domain containing 1                          | 18 | 2655737   | 2805015   | 149279  |
| SMCR8         | Smith-Magenis syndrome chromosome region, candidate 8                                             | 17 | 18218624  | 18226517  | 7894    |
| SMG1          | SMG1, nonsense mediated mRNA decay associated PI3K related kinase                                 | 16 | 18816175  | 18937776  | 121602  |
| SMG6          | SMG6, nonsense mediated mRNA decay factor                                                         | 17 | 1963133   | 2207065   | 243933  |
| <b>SMN1</b>   | survival of motor neuron 1, telomeric                                                             | 5  | 70220768  | 70249769  | 29002   |
| SMOC2         | SPARC related modular calcium binding 2                                                           | 6  | 168841831 | 169073984 | 232154  |
| SMOX          | spermine oxidase                                                                                  | 20 | 4101627   | 4168394   | 66768   |
| SMS           | spermine synthase                                                                                 | X  | 21958691  | 22025798  | 67108   |
| SMURF1        | SMAD specific E3 ubiquitin protein ligase 1                                                       | 7  | 98625061  | 98741723  | 116663  |
| SMYD3         | SET and MYND domain containing 3                                                                  | 1  | 245912642 | 246670614 | 757973  |
| SMYD4         | SET and MYND domain containing 4                                                                  | 17 | 1682779   | 1733928   | 51150   |
| SNAP91        | synaptosome associated protein 91                                                                 | 6  | 84262599  | 84419410  | 156812  |
| SNCA          | synuclein alpha                                                                                   | 4  | 90645250  | 90759466  | 114217  |
| SNCAIP        | synuclein alpha interacting protein                                                               | 5  | 121647049 | 121799914 | 152866  |
| SNCB          | synuclein beta                                                                                    | 5  | 176047085 | 176057530 | 10446   |
| <b>SNCG</b>   | synuclein gamma                                                                                   | 10 | 88718375  | 88723017  | 4643    |
| SND1          | staphylococcal nuclease and tudor domain containing 1                                             | 7  | 127292234 | 127732661 | 440428  |
| SNRNP200      | small nuclear ribonucleoprotein U5 subunit 200                                                    | 2  | 96940074  | 96971297  | 31224   |
| SNRNP40       | small nuclear ribonucleoprotein U5 subunit 40                                                     | 1  | 31732417  | 31769662  | 37246   |
| SNRPB2        | small nuclear ribonucleoprotein polypeptide B2                                                    | 20 | 16710606  | 16722421  | 11816   |
| SNRPN         | small nuclear ribonucleoprotein polypeptide N                                                     | 15 | 25068794  | 25223870  | 155077  |
| SNTB1         | syntrophin beta 1                                                                                 | 8  | 121547985 | 121825513 | 277529  |
| SNTG1         | syntrophin gamma 1                                                                                | 8  | 50822349  | 51706678  | 884330  |
| SNTG2         | syntrophin gamma 2                                                                                | 2  | 946554    | 1371385   | 424832  |
| SNX17         | sorting nexin 17                                                                                  | 2  | 27593389  | 27599995  | 6607    |
| SNX18         | sorting nexin 18                                                                                  | 5  | 53813589  | 53842415  | 28827   |
| SNX2          | sorting nexin 2                                                                                   | 5  | 122110691 | 122165803 | 55113   |
| SNX24         | sorting nexin 24                                                                                  | 5  | 122179134 | 122365049 | 185916  |
| SNX25         | sorting nexin 25                                                                                  | 4  | 186125391 | 186291339 | 165949  |
| <b>SNX29</b>  | sorting nexin 29                                                                                  | 16 | 12070594  | 12668146  | 597553  |
| SNX29P2       | sorting nexin 29 pseudogene 2                                                                     | 16 | 29262829  | 29519817  | 256989  |
| SNX30         | sorting nexin family member 30                                                                    | 9  | 115513118 | 115643951 | 130834  |
| SNX4          | sorting nexin 4                                                                                   | 3  | 125165495 | 125239041 | 73547   |
| SNX9          | sorting nexin 9                                                                                   | 6  | 158244296 | 158366109 | 121814  |
| SOAT1         | sterol O-acyltransferase 1                                                                        | 1  | 179262925 | 179327815 | 64891   |
| SOBP          | sine oculis binding protein homolog                                                               | 6  | 107811162 | 107981357 | 170196  |
| <b>SOD1</b>   | superoxide dismutase 1                                                                            | 21 | 33031935  | 33041244  | 9310    |
| <b>SOD2</b>   | superoxide dismutase 2                                                                            | 6  | 160090089 | 160183561 | 93473   |
| SORBS1        | sorbin and SH3 domain containing 1                                                                | 10 | 97071528  | 97321171  | 249644  |
| SORBS2        | sorbin and SH3 domain containing 2                                                                | 4  | 186506598 | 186877806 | 371209  |
| SORCS1        | sortilin related VPS10 domain containing receptor 1                                               | 10 | 108333421 | 108924292 | 590872  |
| SORCS2        | sortilin related VPS10 domain containing receptor 2                                               | 4  | 7194265   | 7744554   | 550290  |
| <b>SORCS3</b> | sortilin related VPS10 domain containing receptor 3                                               | 10 | 106400859 | 107024993 | 624135  |
| SORD          | sorbitol dehydrogenase                                                                            | 15 | 45315302  | 45369383  | 54082   |
| SORL1         | sortilin related receptor 1                                                                       | 11 | 121322912 | 121504402 | 181491  |
| SOS1          | SOS Ras/Rac guanine nucleotide exchange factor 1                                                  | 2  | 39208537  | 39351486  | 142950  |
| SOS2          | SOS Ras/Rho guanine nucleotide exchange factor 2                                                  | 14 | 50583847  | 50698276  | 114430  |
| SOX2-OT       | SOX2 overlapping transcript                                                                       | 3  | 180707558 | 181554668 | 847111  |
| SOX4          | SRY-box 4                                                                                         | 6  | 21593972  | 21598847  | 4876    |
| <b>SOX5</b>   | SRY-box 5                                                                                         | 12 | 23682440  | 24103966  | 421527  |
| SOX6          | SRY-box 6                                                                                         | 11 | 15987995  | 16761138  | 773144  |
| SOX9-AS1      | SOX9 antisense RNA 1                                                                              | 17 | 70033455  | 70217977  | 184523  |
| SP1           | Sp1 transcription factor                                                                          | 12 | 53773960  | 53810230  | 36271   |
| SP140         | SP140 nuclear body protein                                                                        | 2  | 231067826 | 231223762 | 155937  |
| SPAG16        | sperm associated antigen 16                                                                       | 2  | 214149113 | 215275225 | 1126113 |
| SPAG5-AS1     | SPAG5 antisense RNA 1                                                                             | 17 | 26925808  | 26944393  | 18586   |
| SPAG9         | sperm associated antigen 9                                                                        | 17 | 49039535  | 49198226  | 158692  |
| SPANXA2-OT1   | SPANXA2 overlapping transcript 1                                                                  | X  | 140590843 | 140738057 | 147215  |
| <b>SPAST</b>  | spastin                                                                                           | 2  | 32288680  | 32382706  | 94027   |
| SPATA13       | spermatogenesis associated 13                                                                     | 13 | 24553944  | 24881212  | 327269  |
| SPATA16       | spermatogenesis associated 16                                                                     | 3  | 172607148 | 172859058 | 251911  |
| SPATA17       | spermatogenesis associated 17                                                                     | 1  | 217804666 | 218045038 | 240373  |
| SPATA18       | spermatogenesis associated 18                                                                     | 4  | 52917497  | 52963458  | 45962   |
| SPATA5        | spermatogenesis associated 5                                                                      | 4  | 123844229 | 124240605 | 396377  |
| SPATA6        | spermatogenesis associated 6                                                                      | 1  | 48761044  | 48937845  | 176802  |

|                 |                                                                     |    |           |           |        |
|-----------------|---------------------------------------------------------------------|----|-----------|-----------|--------|
| SPATS2          | spermatogenesis associated serine rich 2                            | 12 | 49760367  | 49921205  | 160839 |
| SPCS2           | signal peptidase complex subunit 2                                  | 11 | 74660292  | 74690076  | 29785  |
| SPECC1L         | sperm antigen with calponin homology and coiled-coil domains 1 like | 22 | 24666786  | 24813708  | 146923 |
| SPECC1L-ADORA2A | SPECC1L-ADORA2A readthrough (NMD candidate)                         | 22 | 24666866  | 24838324  | 171459 |
| SPEF2           | sperm flagellar 2                                                   | 5  | 35617946  | 35814713  | 196768 |
| SPEN            | spen family transcriptional repressor                               | 1  | 16174359  | 16266955  | 92597  |
| <b>SPG11</b>    | SPG11, spatacsin vesicle trafficking associated                     | 15 | 44854894  | 44955876  | 100983 |
| SPG20           | spastic paraplegia 20 (Troyer syndrome)                             | 13 | 36875775  | 36944317  | 68543  |
| SPG21           | SPG21, maspardin                                                    | 15 | 65255362  | 65282648  | 27287  |
| <b>SPG7</b>     | SPG7, paraplegin matrix AAA peptidase subunit                       | 16 | 89557325  | 89624176  | 66852  |
| SPIDR           | scaffolding protein involved in DNA repair                          | 8  | 48173167  | 48648868  | 475702 |
| SPINK1          | serine peptidase inhibitor, Kazal type 1                            | 5  | 147204131 | 147211349 | 7219   |
| SPINK5          | serine peptidase inhibitor, Kazal type 5                            | 5  | 147405246 | 147516852 | 111607 |
| SPIRE1          | spire type actin nucleation factor 1                                | 18 | 12446511  | 12658133  | 211623 |
| <b>SPOCK1</b>   | SPARC/osteonectin, cwcv and kazal like domains proteoglycan 1       | 5  | 136310987 | 136934068 | 623082 |
| SPOCK3          | SPARC/osteonectin, cwcv and kazal like domains proteoglycan 3       | 4  | 167654535 | 168155947 | 501413 |
| SPON1           | spondin 1                                                           | 11 | 13983914  | 14289646  | 305733 |
| SPOP            | speckle type BTB/POZ protein                                        | 17 | 47676246  | 47755596  | 79351  |
| SPPL3           | signal peptide peptidase like 3                                     | 12 | 121200313 | 121342174 | 141862 |
| SPR             | sepiapterin reductase (7,8-dihydrobiopterin:NADP+ oxidoreductase)   | 2  | 73114489  | 73119287  | 4799   |
| SPRED2          | sprouty related EVH1 domain containing 2                            | 2  | 65537985  | 65659771  | 121787 |
| SPRY4           | sprouty RTK signaling antagonist 4                                  | 5  | 141689992 | 141706020 | 16029  |
| SPTB            | spectrin beta, erythrocytic                                         | 14 | 65213002  | 65346601  | 133600 |
| SPTBN1          | spectrin beta, non-erythrocytic 1                                   | 2  | 54683422  | 54896812  | 213391 |
| SPTBN2          | spectrin beta, non-erythrocytic 2                                   | 11 | 66452719  | 66496697  | 43979  |
| SPTBN4          | spectrin beta, non-erythrocytic 4                                   | 19 | 40972148  | 41082370  | 110223 |
| SPTLC1          | serine palmitoyltransferase long chain base subunit 1               | 9  | 94794281  | 94877666  | 83386  |
| SPTLC2          | serine palmitoyltransferase long chain base subunit 2               | 14 | 77972340  | 78083116  | 110777 |
| SPTLC3          | serine palmitoyltransferase long chain base subunit 3               | 20 | 12989627  | 13147411  | 157785 |
| SPTSSA          | serine palmitoyltransferase small subunit A                         | 14 | 34901995  | 34931562  | 29568  |
| SPTY2D1         | SPT2 chromatin protein domain containing 1                          | 11 | 18627948  | 18656338  | 28391  |
| <b>SQSTM1</b>   | sequestosome 1                                                      | 5  | 179233388 | 179265078 | 31691  |
| SRBD1           | S1 RNA binding domain 1                                             | 2  | 45615819  | 45839304  | 223486 |
| SRC             | SRC proto-oncogene, non-receptor tyrosine kinase                    | 20 | 35973088  | 36034453  | 61366  |
| SRCIN1          | SRC kinase signaling inhibitor 1                                    | 17 | 36686251  | 36762183  | 75933  |
| SRD5A1          | steroid 5 alpha-reductase 1                                         | 5  | 6633456   | 6669675   | 36220  |
| SRD5A2          | steroid 5 alpha-reductase 2                                         | 2  | 31747550  | 31806136  | 58587  |
| SREBF1          | sterol regulatory element binding transcription factor 1            | 17 | 17713713  | 17740325  | 26613  |
| SREBF2          | sterol regulatory element binding transcription factor 2            | 22 | 42229109  | 42303312  | 74204  |
| SRGAP1          | SLIT-ROBO Rho GTPase activating protein 1                           | 12 | 64238073  | 64541613  | 303541 |
| SRGAP3          | SLIT-ROBO Rho GTPase activating protein 3                           | 3  | 9022275   | 9404737   | 382463 |
| SRPK2           | SRSF protein kinase 2                                               | 7  | 104751151 | 105039755 | 288605 |
| SRPX            | sushi repeat containing protein, X-linked                           | X  | 38008589  | 38080696  | 72108  |
| SRPX2           | sushi repeat containing protein, X-linked 2                         | X  | 99899215  | 99926296  | 27082  |
| SRRM4           | serine/arginine repetitive matrix 4                                 | 12 | 119419300 | 119600856 | 181557 |
| SRSF3           | serine and arginine rich splicing factor 3                          | 6  | 36562145  | 36573377  | 11233  |
| SRSF4           | serine and arginine rich splicing factor 4                          | 1  | 29474255  | 29508499  | 34245  |
| <b>SS18L1</b>   | SS18L1, nBAF chromatin remodeling complex subunit                   | 20 | 60718822  | 60757540  | 38719  |
| SSBP2           | single stranded DNA binding protein 2                               | 5  | 80708840  | 81047616  | 338777 |
| SSBP3           | single stranded DNA binding protein 3                               | 1  | 54691105  | 54879152  | 188048 |
| SSH2            | slingshot protein phosphatase 2                                     | 17 | 27952956  | 28257294  | 304339 |
| SST             | somatostatin                                                        | 3  | 187386694 | 187388187 | 1494   |
| SSU72           | SSU72 homolog, RNA polymerase II CTD phosphatase                    | 1  | 1477053   | 1510249   | 33197  |
| <b>SSX2IP</b>   | SSX family member 2 interacting protein                             | 1  | 85109390  | 85156486  | 47097  |
| SSX5            | SSX family member 5                                                 | X  | 48045656  | 48056199  | 10544  |
| ST18            | ST18, C2H2C-type zinc finger                                        | 8  | 53023399  | 53373519  | 350121 |
| ST3GAL3         | ST3 beta-galactoside alpha-2,3-sialyltransferase 3                  | 1  | 44171495  | 44396831  | 225337 |
| ST3GAL5         | ST3 beta-galactoside alpha-2,3-sialyltransferase 5                  | 2  | 86066267  | 86116137  | 49871  |
| <b>ST3GAL6</b>  | ST3 beta-galactoside alpha-2,3-sialyltransferase 6                  | 3  | 98451080  | 98540045  | 88966  |
| ST5             | suppression of tumorigenicity 5                                     | 11 | 8714898   | 8932498   | 217601 |
| ST6GAL2         | ST6 beta-galactoside alpha-2,6-sialyltransferase 2                  | 2  | 107418056 | 107503564 | 85509  |
| ST6GALNAC3      | ST6 N-acetylgalactosaminide alpha-2,6-sialyltransferase 3           | 1  | 76540404  | 77100286  | 559883 |
| ST6GALNAC5      | ST6 N-acetylgalactosaminide alpha-2,6-sialyltransferase 5           | 1  | 77333126  | 77531396  | 198271 |
| ST7             | suppression of tumorigenicity 7                                     | 7  | 116593292 | 116870157 | 276866 |
| STAB2           | stabilin 2                                                          | 12 | 103981051 | 104160505 | 179455 |
| STAC            | SH3 and cysteine rich domain                                        | 3  | 36421836  | 36589499  | 167664 |
| STAG1           | stromal antigen 1                                                   | 3  | 136055077 | 136471220 | 416144 |
| STAG2           | stromal antigen 2                                                   | X  | 123094062 | 123556514 | 462453 |
| STAG3           | stromal antigen 3                                                   | 7  | 99775186  | 99819111  | 43926  |
| STAM            | signal transducing adaptor molecule                                 | 10 | 17686124  | 17757913  | 71790  |
| STAM2           | signal transducing adaptor molecule 2                               | 2  | 152973315 | 153032506 | 59192  |
| STAMBP          | STAM binding protein                                                | 2  | 74056086  | 74100786  | 44701  |
| STAP1           | signal transducing adaptor family member 1                          | 4  | 68424446  | 68473055  | 48610  |
| STARD10         | StAR related lipid transfer domain containing 10                    | 11 | 72465774  | 72504726  | 38953  |
| <b>STARD13</b>  | StAR related lipid transfer domain containing 13                    | 13 | 33677272  | 33924767  | 247496 |
| STARD4-AS1      | STARD4 antisense RNA 1                                              | 5  | 110847924 | 111075423 | 227500 |
| STAT3           | signal transducer and activator of transcription 3                  | 17 | 40465342  | 40540586  | 75245  |

|               |                                                                            |    |           |           |        |
|---------------|----------------------------------------------------------------------------|----|-----------|-----------|--------|
| STAT4         | signal transducer and activator of transcription 4                         | 2  | 191894302 | 192016322 | 122021 |
| STAU1         | stauflen double-stranded RNA binding protein 1                             | 20 | 47729878  | 47804904  | 75027  |
| STAU2         | stauflen double-stranded RNA binding protein 2                             | 8  | 74332604  | 74659943  | 327340 |
| STEAP2        | STEAP2 metalloredutase                                                     | 7  | 89796904  | 89867451  | 70548  |
| STIL          | SCL/TAL1 interrupting locus                                                | 1  | 47715811  | 47779819  | 64009  |
| STIM1         | stromal interaction molecule 1                                             | 11 | 3875757   | 4114439   | 238683 |
| STIM2         | stromal interaction molecule 2                                             | 4  | 26859300  | 27027003  | 167704 |
| STK11         | serine/threonine kinase 11                                                 | 19 | 1189406   | 1228428   | 39023  |
| STK16         | serine/threonine kinase 16                                                 | 2  | 220110177 | 220115059 | 4883   |
| STK24         | serine/threonine kinase 24                                                 | 13 | 99102455  | 99230194  | 127740 |
| STK3          | serine/threonine kinase 3                                                  | 8  | 99413631  | 99955055  | 541425 |
| STK32B        | serine/threonine kinase 32B                                                | 4  | 5053169   | 5502725   | 449557 |
| <b>STK39</b>  | serine/threonine kinase 39                                                 | 2  | 168810530 | 169104651 | 294122 |
| STK4          | serine/threonine kinase 4                                                  | 20 | 43595115  | 43708600  | 113486 |
| STON1-GTF2A1L | STON1-GTF2A1L readthrough                                                  | 2  | 48757064  | 49003654  | 246591 |
| STON2         | stonin 2                                                                   | 14 | 81727000  | 81902809  | 175810 |
| STPG1         | sperm tail PG-rich repeat containing 1                                     | 1  | 24683489  | 24743424  | 59936  |
| STPG2         | sperm tail PG-rich repeat containing 2                                     | 4  | 98105244  | 99064391  | 959148 |
| STRADA        | STE20-related kinase adaptor alpha                                         | 17 | 61780192  | 61819330  | 39139  |
| STRBP         | spermatid perinuclear RNA binding protein                                  | 9  | 125871779 | 126030855 | 159077 |
| STRN          | striatin                                                                   | 2  | 37070783  | 37193615  | 122833 |
| STRN3         | striatin 3                                                                 | 14 | 31363005  | 31495607  | 132603 |
| <b>STS</b>    | steroid sulfatase                                                          | X  | 7137497   | 7272851   | 135355 |
| <b>STX17</b>  | syntaxin 17                                                                | 9  | 102668915 | 102732618 | 63704  |
| STX18         | syntaxin 18                                                                | 4  | 4417469   | 4544073   | 126605 |
| STX8          | syntaxin 8                                                                 | 17 | 9153788   | 9479908   | 326121 |
| STXBP1        | syntaxin binding protein 1                                                 | 9  | 130374544 | 130457460 | 82917  |
| STXBP4        | syntaxin binding protein 4                                                 | 17 | 53046088  | 53241646  | 195559 |
| STXBP5-AS1    | STXBP5 antisense RNA 1                                                     | 6  | 147163037 | 147525750 | 362714 |
| STXBP5L       | syntaxin binding protein 5 like                                            | 3  | 120626919 | 121143608 | 516690 |
| STXBP6        | syntaxin binding protein 6                                                 | 14 | 25278862  | 25519503  | 240642 |
| STYK1         | serine/threonine/tyrosine kinase 1                                         | 12 | 10771538  | 10826917  | 55380  |
| SUCLG2        | succinate-CoA ligase GDP-forming beta subunit                              | 3  | 67410884  | 67705038  | 294155 |
| SUDS3         | SDS3 homolog, SIN3A corepressor complex component                          | 12 | 118814185 | 118855840 | 41656  |
| SUFU          | SUFU negative regulator of hedgehog signaling                              | 10 | 104263744 | 104393292 | 129549 |
| SUGCT         | succinyl-CoA:glutarate-CoA transferase                                     | 7  | 40174575  | 40900362  | 725788 |
| SUGP2         | SURP and G-patch domain containing 2                                       | 19 | 19101697  | 19144832  | 43136  |
| SULT1C3       | sulfotransferase family 1C member 3                                        | 2  | 108863651 | 108881807 | 18157  |
| <b>SUN3</b>   | Sad1 and UNC84 domain containing 3                                         | 7  | 48026745  | 48068716  | 41972  |
| SUPT3H        | SPT3 homolog, SAGA and STAGA complex component                             | 6  | 44777054  | 45345690  | 568637 |
| SUPV3L1       | Suv3 like RNA helicase                                                     | 10 | 70939988  | 70968855  | 28868  |
| SUSD4         | sushi domain containing 4                                                  | 1  | 223394161 | 223537544 | 143384 |
| SUSD5         | sushi domain containing 5                                                  | 3  | 33191537  | 33260707  | 69171  |
| SUZ12         | SUZ12 polycomb repressive complex 2 subunit                                | 17 | 30264037  | 30328064  | 64028  |
| SV2B          | synaptic vesicle glycoprotein 2B                                           | 15 | 91643180  | 91844539  | 201360 |
| SVEP1         | sushi, von Willebrand factor type A, EGF and pentraxin domain containing 1 | 9  | 113127531 | 113342160 | 214630 |
| SVIL          | supervillin                                                                | 10 | 29746267  | 30025710  | 279444 |
| SVOP          | SV2 related protein                                                        | 12 | 109304658 | 109459045 | 154388 |
| SWT1          | SWT1, RNA endoribonuclease homolog                                         | 1  | 185126212 | 185260897 | 134686 |
| SYAP1         | synapse associated protein 1                                               | X  | 16737755  | 16783459  | 45705  |
| SYCP1         | synaptonemal complex protein 1                                             | 1  | 115397424 | 115537991 | 140568 |
| SYCP2         | synaptonemal complex protein 2                                             | 20 | 58438618  | 58508710  | 70093  |
| SYF2          | SYF2 pre-mRNA splicing factor                                              | 1  | 25549170  | 25558993  | 9824   |
| <b>SYK</b>    | spleen associated tyrosine kinase                                          | 9  | 93564069  | 93660831  | 96763  |
| SYN1          | synapsin I                                                                 | X  | 47431303  | 47479252  | 47950  |
| SYN2          | synapsin II                                                                | 3  | 12045876  | 12232900  | 187025 |
| <b>SYN3</b>   | synapsin III                                                               | 22 | 32908539  | 33454358  | 545820 |
| SYNCRIP       | synaptotagmin binding cytoplasmic RNA interacting protein                  | 6  | 86318053  | 86353510  | 35458  |
| SYNDIG1       | synapse differentiation inducing 1                                         | 20 | 24449835  | 24647252  | 197418 |
| <b>SYNE1</b>  | spectrin repeat containing nuclear envelope protein 1                      | 6  | 152442819 | 152958936 | 516118 |
| SYNE2         | spectrin repeat containing nuclear envelope protein 2                      | 14 | 64319683  | 64693165  | 373483 |
| SYNGAP1       | synaptic Ras GTPase activating protein 1                                   | 6  | 33387847  | 33421466  | 33620  |
| SYNJ1         | synaptojanin 1                                                             | 21 | 34001069  | 34100359  | 99291  |
| SYNPO2        | synaptopodin 2                                                             | 4  | 119809996 | 119982402 | 172407 |
| SYNPR         | synaptoporin                                                               | 3  | 63213991  | 63602597  | 388607 |
| SYT1          | synaptotagmin 1                                                            | 12 | 79257773  | 79845788  | 588016 |
| SYT10         | synaptotagmin 10                                                           | 12 | 33527173  | 33592754  | 65582  |
| SYT14         | synaptotagmin 14                                                           | 1  | 210111538 | 210337636 | 226099 |
| SYT16         | synaptotagmin 16                                                           | 14 | 62453803  | 62568431  | 114629 |
| <b>SYT9</b>   | synaptotagmin 9                                                            | 11 | 7260009   | 7490273   | 230265 |
| SYTL2         | synaptotagmin like 2                                                       | 11 | 85405267  | 85522184  | 116918 |
| SYTL4         | synaptotagmin like 4                                                       | X  | 99929488  | 99987110  | 57623  |
| SZT2          | seizure threshold 2 homolog (mouse)                                        | 1  | 43855553  | 43918321  | 62769  |
| TAAR2         | trace amine associated receptor 2 (gene/pseudogene)                        | 6  | 132938161 | 132945414 | 7254   |
| TACC2         | transforming acidic coiled-coil containing protein 2                       | 10 | 123748689 | 124014060 | 265372 |
| TACR1         | tachykinin receptor 1                                                      | 2  | 75273590  | 75426826  | 153237 |

|               |                                                                       |    |           |           |         |
|---------------|-----------------------------------------------------------------------|----|-----------|-----------|---------|
| TACR3         | tachykinin receptor 3                                                 | 4  | 104507188 | 104640973 | 133786  |
| <b>TAF15</b>  | TATA-box binding protein associated factor 15                         | 17 | 34136459  | 34191619  | 55161   |
| TAF3          | TATA-box binding protein associated factor 3                          | 10 | 7860467   | 8058590   | 198124  |
| TAF7          | TATA-box binding protein associated factor 7                          | 5  | 140698057 | 140700330 | 2274    |
| TAGAP         | T-cell activation RhoGTPase activating protein                        | 6  | 159455500 | 159466184 | 10685   |
| TANC1         | tetratricopeptide repeat, ankyrin repeat and coiled-coil containing 1 | 2  | 159825146 | 160089170 | 264025  |
| TANGO6        | transport and golgi organization 6 homolog                            | 16 | 68877507  | 69119083  | 241577  |
| TAOK1         | TAO kinase 1                                                          | 17 | 27717482  | 27878922  | 161441  |
| TAP2          | transporter 2, ATP binding cassette subfamily B member                | 6  | 32781544  | 32806599  | 25056   |
| TAPBPL        | TAP binding protein like                                              | 12 | 6560856   | 6575683   | 14828   |
| TARBP1        | TAR (HIV-1) RNA binding protein 1                                     | 1  | 234527059 | 234614849 | 87791   |
| <b>TARDBP</b> | TAR DNA binding protein                                               | 1  | 11072414  | 11085796  | 13383   |
| TASP1         | taspace 1                                                             | 20 | 13246709  | 13619587  | 372879  |
| TATDN2        | TatD DNase domain containing 2                                        | 3  | 10289707  | 10322902  | 33196   |
| TBC1D1        | TBC1 domain family member 1                                           | 4  | 37892708  | 38140796  | 248089  |
| TBC1D16       | TBC1 domain family member 16                                          | 17 | 77906142  | 78009647  | 103506  |
| TBC1D2        | TBC1 domain family member 2                                           | 9  | 100961311 | 101017915 | 56605   |
| TBC1D22A      | TBC1 domain family member 22A                                         | 22 | 47158518  | 47571336  | 412819  |
| TBC1D24       | TBC1 domain family member 24                                          | 16 | 2525147   | 2555735   | 30589   |
| TBC1D2B       | TBC1 domain family member 2B                                          | 15 | 78276378  | 78370066  | 93689   |
| TBC1D32       | TBC1 domain family member 32                                          | 6  | 121400640 | 121655891 | 255252  |
| TBC1D4        | TBC1 domain family member 4                                           | 13 | 75858808  | 76056250  | 197443  |
| <b>TBC1D5</b> | TBC1 domain family member 5                                           | 3  | 17198654  | 18486309  | 1287656 |
| TBC1D9        | TBC1 domain family member 9                                           | 4  | 141541919 | 141677274 | 135356  |
| TBCA          | tubulin folding cofactor A                                            | 5  | 76986991  | 77164604  | 177614  |
| TBCK          | TBC1 domain containing kinase                                         | 4  | 106962756 | 107242652 | 279897  |
| <b>TBK1</b>   | TANK binding kinase 1                                                 | 12 | 64845660  | 64895888  | 50229   |
| TBL1X         | transducin beta like 1X-linked                                        | X  | 9431335   | 9687780   | 256446  |
| TBL1Y         | transducin beta like 1, Y-linked                                      | Y  | 6778727   | 6959724   | 180998  |
| TBP           | TATA-box binding protein                                              | 6  | 170863390 | 170881958 | 18569   |
| TBX18         | T-box 18                                                              | 6  | 85397069  | 85474237  | 77169   |
| TBX5          | T-box 5                                                               | 12 | 114791736 | 114846247 | 54512   |
| TC2N          | tandem C2 domains, nuclear                                            | 14 | 92246095  | 92333880  | 87786   |
| TCAIM         | T-cell activation inhibitor, mitochondrial                            | 3  | 44379611  | 44450943  | 71333   |
| TCAP          | titin-cap                                                             | 17 | 37820440  | 37822808  | 2369    |
| TCERG1L       | transcription elongation regulator 1 like                             | 10 | 132890654 | 133109984 | 219331  |
| TCF12         | transcription factor 12                                               | 15 | 57210821  | 57591479  | 380659  |
| TCF4          | transcription factor 4                                                | 18 | 52889562  | 53332018  | 442457  |
| TCF7L1        | transcription factor 7 like 1                                         | 2  | 85360533  | 85537511  | 176979  |
| TCF7L2        | transcription factor 7 like 2                                         | 10 | 114710009 | 114927437 | 217429  |
| TCL1A         | T-cell leukemia/lymphoma 1A                                           | 14 | 96176304  | 96180533  | 4230    |
| TCN1          | transcobalamin 1                                                      | 11 | 59620273  | 59634048  | 13776   |
| TCN2          | transcobalamin 2                                                      | 22 | 31002825  | 31023265  | 20441   |
| TDP1          | tyrosyl-DNA phosphodiesterase 1                                       | 14 | 90421283  | 90511106  | 89824   |
| TDP2          | tyrosyl-DNA phosphodiesterase 2                                       | 6  | 24650205  | 24667261  | 17057   |
| TDRD15        | tudor domain containing 15                                            | 2  | 21346789  | 21366144  | 19356   |
| TDRD7         | tudor domain containing 7                                             | 9  | 100174232 | 100258407 | 84176   |
| TDRD9         | tudor domain containing 9                                             | 14 | 104394799 | 104519004 | 124206  |
| TDRP          | testis development related protein                                    | 8  | 439803    | 495781    | 55979   |
| TEAD1         | TEA domain transcription factor 1                                     | 11 | 12695969  | 12966298  | 270330  |
| TECPR2        | tectonin beta-propeller repeat containing 2                           | 14 | 102829300 | 102968818 | 139519  |
| TECR          | trans-2,3-enoyl-CoA reductase                                         | 19 | 14627897  | 14676792  | 48896   |
| TECTA         | tectorin alpha                                                        | 11 | 120971882 | 121062202 | 90321   |
| TECTB         | tectorin beta                                                         | 10 | 114043493 | 114064793 | 21301   |
| TEF           | TEF, PAR bZIP transcription factor                                    | 22 | 41763337  | 41795330  | 31994   |
| TEK           | TEK receptor tyrosine kinase                                          | 9  | 27109139  | 27230173  | 121035  |
| TEKT5         | tektin 5                                                              | 16 | 10721358  | 10788802  | 67445   |
| TENM1         | teneurin transmembrane protein 1                                      | X  | 123509753 | 124097666 | 587914  |
| TENM2         | teneurin transmembrane protein 2                                      | 5  | 166711804 | 167691162 | 979359  |
| TENM3         | teneurin transmembrane protein 3                                      | 4  | 183065140 | 183724177 | 659038  |
| TENM4         | teneurin transmembrane protein 4                                      | 11 | 78363876  | 79151992  | 788117  |
| TEPP          | testis, prostate and placenta expressed                               | 16 | 58010339  | 58022020  | 11682   |
| TERF2         | telomeric repeat binding factor 2                                     | 16 | 69389464  | 69442474  | 53011   |
| TET1          | tet methylcytosine dioxygenase 1                                      | 10 | 70320413  | 70454239  | 133827  |
| TET2          | tet methylcytosine dioxygenase 2                                      | 4  | 106067032 | 106200973 | 133942  |
| TEX11         | testis expressed 11                                                   | X  | 69748790  | 70128581  | 379792  |
| TEX2          | testis expressed 2                                                    | 17 | 62224587  | 62340661  | 116075  |
| TEX41         | testis expressed 41 (non-protein coding)                              | 2  | 145425534 | 145940216 | 514683  |
| TF            | transferrin                                                           | 3  | 133464800 | 133497850 | 33051   |
| TFAM          | transcription factor A, mitochondrial                                 | 10 | 60144782  | 60158981  | 14200   |
| TFAP2D        | transcription factor AP-2 delta                                       | 6  | 50681541  | 50740701  | 59161   |
| TFB1M         | transcription factor B1, mitochondrial                                | 6  | 155578643 | 155635627 | 56985   |
| TFB2M         | transcription factor B2, mitochondrial                                | 1  | 246703862 | 246729626 | 25765   |
| TFCP2         | transcription factor CP2                                              | 12 | 51487446  | 51566926  | 79481   |
| TFDP1         | transcription factor Dp-1                                             | 13 | 114239013 | 114295785 | 56773   |
| TFDP2         | transcription factor Dp-2                                             | 3  | 141663277 | 141868386 | 205110  |
| TFR2          | transferrin receptor 2                                                | 7  | 100218039 | 100240402 | 22364   |



|              |                                                                        |    |           |           |        |
|--------------|------------------------------------------------------------------------|----|-----------|-----------|--------|
| TG           | thyroglobulin                                                          | 8  | 133879203 | 134147147 | 267945 |
| TGFA         | transforming growth factor alpha                                       | 2  | 70674412  | 70781325  | 106914 |
| TGFB1        | transforming growth factor beta 1                                      | 19 | 41807492  | 41859816  | 52325  |
| TGFBR3       | transforming growth factor beta receptor 3                             | 1  | 92145902  | 92371892  | 225991 |
| TGFBRAP1     | transforming growth factor beta receptor associated protein 1          | 2  | 105880871 | 105946491 | 65621  |
| TGM6         | transglutaminase 6                                                     | 20 | 2361554   | 2413399   | 51846  |
| TGS1         | trimethylguanosine synthase 1                                          | 8  | 56685701  | 56738007  | 52307  |
| TH           | tyrosine hydroxylase                                                   | 11 | 2185159   | 2193107   | 7949   |
| THADA        | THADA, armadillo repeat containing                                     | 2  | 43393800  | 43823185  | 429386 |
| THBD         | thrombomodulin                                                         | 20 | 23026270  | 23030378  | 4109   |
| THBS2        | thrombospondin 2                                                       | 6  | 169615875 | 169654139 | 38265  |
| THEMIS       | thymocyte selection associated                                         | 6  | 128029217 | 128239776 | 210560 |
| THOC1        | THO complex 1                                                          | 18 | 214520    | 268050    | 53531  |
| THOC2        | THO complex 2                                                          | X  | 122734412 | 122866906 | 132495 |
| THRA         | thyroid hormone receptor, alpha                                        | 17 | 38214543  | 38250120  | 35578  |
| THRB         | thyroid hormone receptor beta                                          | 3  | 24158651  | 24536773  | 378123 |
| THSD1        | thrombospondin type 1 domain containing 1                              | 13 | 52951305  | 52980629  | 29325  |
| THSD4        | thrombospondin type 1 domain containing 4                              | 15 | 71389291  | 72075722  | 686432 |
| THSD7A       | thrombospondin type 1 domain containing 7A                             | 7  | 11409984  | 11871824  | 461841 |
| THSD7B       | thrombospondin type 1 domain containing 7B                             | 2  | 137523115 | 138435287 | 912173 |
| TIAM1        | T-cell lymphoma invasion and metastasis 1                              | 21 | 32490734  | 32932290  | 441557 |
| TIAM2        | T-cell lymphoma invasion and metastasis 2                              | 6  | 155153831 | 155578857 | 425027 |
| TIMM23B      | translocase of inner mitochondrial membrane 23 homolog B               | 10 | 51371390  | 51387768  | 16379  |
| TIMP2        | TIMP metalloproteinase inhibitor 2                                     | 17 | 76849059  | 76921469  | 72411  |
| TINAG        | tubulointerstitial nephritis antigen                                   | 6  | 54172657  | 54254950  | 82294  |
| TIPARP       | TCDD inducible poly(ADP-ribose) polymerase                             | 3  | 156391024 | 156424559 | 33536  |
| TIPIN        | TIMELESS interacting protein                                           | 15 | 66628544  | 66679084  | 50541  |
| TJP1         | tight junction protein 1                                               | 15 | 29991571  | 30261068  | 269498 |
| TJP2         | tight junction protein 2                                               | 9  | 71736209  | 71870124  | 133916 |
| TJP3         | tight junction protein 3                                               | 19 | 3708107   | 3750811   | 42705  |
| TK2          | thymidine kinase 2, mitochondrial                                      | 16 | 66541906  | 66586447  | 44542  |
| TLDC1        | TBC/LysM-associated domain containing 1                                | 16 | 84511681  | 84587639  | 75959  |
| TLDC2        | TBC/LysM-associated domain containing 2                                | 20 | 35504524  | 35522638  | 18115  |
| TLK1         | tousled like kinase 1                                                  | 2  | 171847333 | 172087824 | 240492 |
| TLK2         | tousled like kinase 2                                                  | 17 | 60536019  | 60692842  | 156824 |
| TLL1         | tolloid like 1                                                         | 4  | 166794410 | 167025047 | 230638 |
| TLN2         | talin 2                                                                | 15 | 62682725  | 63136830  | 454106 |
| TLR4         | toll like receptor 4                                                   | 9  | 120466610 | 120479149 | 12540  |
| TLX1NB       | TLX1 neighbor                                                          | 10 | 102849078 | 102890883 | 41806  |
| TM9SF3       | transmembrane 9 superfamily member 3                                   | 10 | 98277866  | 98347209  | 69344  |
| TMC1         | transmembrane channel like 1                                           | 9  | 75136717  | 75451267  | 314551 |
| TMC5         | transmembrane channel like 5                                           | 16 | 19421818  | 19510435  | 88618  |
| TMCC1        | transmembrane and coiled-coil domain family 1                          | 3  | 129366635 | 129612419 | 245785 |
| TMCC3        | transmembrane and coiled-coil domain family 3                          | 12 | 94960900  | 95044338  | 83439  |
| TMED5        | transmembrane p24 trafficking protein 5                                | 1  | 93615299  | 93646285  | 30987  |
| TMED6        | transmembrane p24 trafficking protein 6                                | 16 | 69377151  | 69385712  | 8562   |
| TMEFF2       | transmembrane protein with EGF like and two follistatin like domains 2 | 2  | 192813769 | 193060435 | 246667 |
| TMEM106B     | transmembrane protein 106B                                             | 7  | 12250867  | 12282993  | 32127  |
| TMEM108      | transmembrane protein 108                                              | 3  | 132757235 | 133116636 | 359402 |
| TMEM117      | transmembrane protein 117                                              | 12 | 44229770  | 44783545  | 553776 |
| TMEM131      | transmembrane protein 131                                              | 2  | 98372799  | 98612388  | 239590 |
| TMEM132B     | transmembrane protein 132B                                             | 12 | 125671382 | 126146917 | 475536 |
| TMEM132C     | transmembrane protein 132C                                             | 12 | 128751948 | 129192460 | 440513 |
| TMEM132D     | transmembrane protein 132D                                             | 12 | 129556270 | 130388211 | 831942 |
| TMEM135      | transmembrane protein 135                                              | 11 | 86748886  | 87034800  | 285915 |
| TMEM138      | transmembrane protein 138                                              | 11 | 61129473  | 61136981  | 7509   |
| TMEM161B     | transmembrane protein 161B                                             | 5  | 87485450  | 87565293  | 79844  |
| TMEM161B-AS1 | TMEM161B antisense RNA 1                                               | 5  | 87564712  | 87732502  | 167791 |
| TMEM163      | transmembrane protein 163                                              | 2  | 135213330 | 135476570 | 263241 |
| TMEM165      | transmembrane protein 165                                              | 4  | 56262124  | 56319564  | 57441  |
| TMEM17       | transmembrane protein 17                                               | 2  | 62727356  | 62739029  | 11674  |
| TMEM170A     | transmembrane protein 170A                                             | 16 | 75476952  | 75499395  | 22444  |
| TMEM178A     | transmembrane protein 178A                                             | 2  | 39892122  | 39945103  | 52982  |
| TMEM178B     | transmembrane protein 178B                                             | 7  | 140774032 | 141180180 | 406149 |
| TMEM19       | transmembrane protein 19                                               | 12 | 72079867  | 72097836  | 17970  |
| TMEM192      | transmembrane protein 192                                              | 4  | 165995574 | 166129701 | 134128 |
| TMEM2        | transmembrane protein 2                                                | 9  | 74298282  | 74431606  | 133325 |
| TMEM216      | transmembrane protein 216                                              | 11 | 61159159  | 61166335  | 7177   |
| TMEM217      | transmembrane protein 217                                              | 6  | 37179956  | 37225931  | 45976  |
| TMEM218      | transmembrane protein 218                                              | 11 | 124966398 | 124981659 | 15262  |
| TMEM219      | transmembrane protein 219                                              | 16 | 29952206  | 29984373  | 32168  |
| TMEM231      | transmembrane protein 231                                              | 16 | 75572015  | 75590184  | 18170  |
| TMEM232      | transmembrane protein 232                                              | 5  | 109624934 | 110074657 | 449724 |
| TMEM241      | transmembrane protein 241                                              | 18 | 20777108  | 21017925  | 240818 |
| TMEM242      | transmembrane protein 242                                              | 6  | 157710418 | 157744633 | 34216  |
| TMEM26       | transmembrane protein 26                                               | 10 | 63166401  | 63213208  | 46808  |

|              |                                                                   |    |           |           |        |
|--------------|-------------------------------------------------------------------|----|-----------|-----------|--------|
| TMEM260      | transmembrane protein 260                                         | 14 | 56955072  | 57117324  | 162253 |
| TMEM5        | transmembrane protein 5                                           | 12 | 64173583  | 64203338  | 29756  |
| TMEM52B      | transmembrane protein 52B                                         | 12 | 10323141  | 10344400  | 21260  |
| TMEM59       | transmembrane protein 59                                          | 1  | 54497347  | 54519177  | 21831  |
| TMEM65       | transmembrane protein 65                                          | 8  | 125324231 | 125384933 | 60703  |
| TMEM67       | transmembrane protein 67                                          | 8  | 94767072  | 94831462  | 64391  |
| TMEM68       | transmembrane protein 68                                          | 8  | 56608983  | 56685966  | 76984  |
| TMEM70       | transmembrane protein 70                                          | 8  | 74884672  | 74895018  | 10347  |
| TMEM71       | transmembrane protein 71                                          | 8  | 133697253 | 133772958 | 75706  |
| TMEM97       | transmembrane protein 97                                          | 17 | 26646121  | 26655707  | 9587   |
| TMEM98       | transmembrane protein 98                                          | 17 | 31254928  | 31272124  | 17197  |
| TMF1         | TATA element modulatory factor 1                                  | 3  | 69068978  | 69101484  | 32507  |
| TMLHE        | trimethyllysine hydroxylase, epsilon                              | X  | 154719776 | 154899605 | 179830 |
| TMOD3        | tropomodulin 3                                                    | 15 | 52121825  | 52239492  | 117668 |
| TMPRSS11F    | transmembrane protease, serine 11F                                | 4  | 68918916  | 68995598  | 76683  |
| TMPRSS15     | transmembrane protease, serine 15                                 | 21 | 19641433  | 19858197  | 216765 |
| TMPRSS2      | transmembrane protease, serine 2                                  | 21 | 42836478  | 42903043  | 66566  |
| TMPRSS4-AS1  | TMPRSS4 antisense RNA 1                                           | 11 | 117886487 | 117957508 | 71022  |
| TMPRSS6      | transmembrane protease, serine 6                                  | 22 | 37461476  | 37505603  | 44128  |
| TMTC1        | transmembrane and tetratricopeptide repeat containing 1           | 12 | 29653773  | 29937692  | 283920 |
| TMTC2        | transmembrane and tetratricopeptide repeat containing 2           | 12 | 83080659  | 83528649  | 447991 |
| TMX3         | thioredoxin related transmembrane protein 3                       | 18 | 66340925  | 66382535  | 41611  |
| TNC          | tenascin C                                                        | 9  | 117782806 | 117880536 | 97731  |
| TNF          | tumor necrosis factor                                             | 6  | 31543344  | 31546113  | 2770   |
| TNFAIP8      | TNF alpha induced protein 8                                       | 5  | 118604387 | 118735383 | 130997 |
| TNFAIP8L3    | TNF alpha induced protein 8 like 3                                | 15 | 51348795  | 51397473  | 48679  |
| TNFRSF10B    | TNF receptor superfamily member 10b                               | 8  | 22877646  | 22926692  | 49047  |
| TNFRSF1A     | TNF receptor superfamily member 1A                                | 12 | 6437923   | 6451280   | 13358  |
| TNFRSF1B     | TNF receptor superfamily member 1B                                | 1  | 12227060  | 12269285  | 42226  |
| TNFSF18      | TNF superfamily member 18                                         | 1  | 173009100 | 173020103 | 11004  |
| TNIK         | TRAF2 and NCK interacting kinase                                  | 3  | 170779128 | 171178197 | 399070 |
| TNIP3        | TNFAIP3 interacting protein 3                                     | 4  | 122052563 | 122148621 | 96059  |
| TNK1         | tyrosine kinase non receptor 1                                    | 17 | 7283853   | 7293093   | 9241   |
| TNK2         | tyrosine kinase non receptor 2                                    | 3  | 195590235 | 195638816 | 48582  |
| TNKS         | tankyrase                                                         | 8  | 9413424   | 9639856   | 226433 |
| TNMD         | tenomodulin                                                       | X  | 99839799  | 99854882  | 15084  |
| TNPO3        | transportin 3                                                     | 7  | 128594948 | 128695198 | 100251 |
| TNR          | tenascin R                                                        | 1  | 175284330 | 175712906 | 428577 |
| TNRC6A       | trinucleotide repeat containing 6A                                | 16 | 24741016  | 24838953  | 97938  |
| TNRC6B       | trinucleotide repeat containing 6B                                | 22 | 40440821  | 40731812  | 290992 |
| TNRC6C       | trinucleotide repeat containing 6C                                | 17 | 76000249  | 76104916  | 104668 |
| TNS3         | tensin 3                                                          | 7  | 47314752  | 47622156  | 307405 |
| TOM1L2       | target of myb1 like 2 membrane trafficking protein                | 17 | 17746828  | 17875736  | 128909 |
| TOMM40       | translocase of outer mitochondrial membrane 40                    | 19 | 45393826  | 45406946  | 13121  |
| TOP2A        | topoisomerase (DNA) II alpha                                      | 17 | 38544768  | 38574202  | 29435  |
| TOP2B        | topoisomerase (DNA) II beta                                       | 3  | 25639475  | 25706398  | 66924  |
| TOP3A        | topoisomerase (DNA) III alpha                                     | 17 | 18174742  | 18218321  | 43580  |
| TOR1A        | torsin family 1 member A                                          | 9  | 132575223 | 132586413 | 11191  |
| TOR1AIP2     | torsin 1A interacting protein 2                                   | 1  | 179809102 | 179846938 | 37837  |
| TOX          | thymocyte selection associated high mobility group box            | 8  | 59717977  | 60031767  | 313791 |
| TOX2         | TOX high mobility group box family member 2                       | 20 | 42543504  | 42698256  | 154753 |
| TOX3         | TOX high mobility group box family member 3                       | 16 | 52471917  | 52581714  | 109798 |
| TP53         | tumor protein p53                                                 | 17 | 7565097   | 7590856   | 25760  |
| TP63         | tumor protein p63                                                 | 3  | 189349205 | 189615068 | 265864 |
| TP73         | tumor protein p73                                                 | 1  | 3569084   | 3652765   | 83682  |
| TPD52L1      | tumor protein D52 like 1                                          | 6  | 125440195 | 125585553 | 145359 |
| TPH1         | tryptophan hydroxylase 1                                          | 11 | 18039111  | 18063973  | 24863  |
| TPK1         | thiamin pyrophosphokinase 1                                       | 7  | 144149034 | 144533488 | 384455 |
| TPM2         | tropomyosin 2 (beta)                                              | 9  | 35681989  | 35691017  | 9029   |
| TPO          | thyroid peroxidase                                                | 2  | 1377995   | 1547483   | 169489 |
| TPP1         | tripeptidyl peptidase 1                                           | 11 | 6634000   | 6640692   | 6693   |
| TPRG1        | tumor protein p63 regulated 1                                     | 3  | 188665003 | 189043093 | 378091 |
| TPRKB        | TP53RK binding protein                                            | 2  | 73956231  | 73964527  | 8297   |
| TPRXL        | tetrapeptide repeat homeobox like                                 | 3  | 13978756  | 14124311  | 145556 |
| TPST1        | tyrosylprotein sulfotransferase 1                                 | 7  | 65670186  | 65885530  | 215345 |
| TPTE2        | transmembrane phosphoinositide 3-phosphatase and tensin homolog 2 | 13 | 19997017  | 20110903  | 113887 |
| TPX2         | TPX2, microtubule nucleation factor                               | 20 | 30327074  | 30389608  | 62535  |
| TRABD2A      | TraB domain containing 2A                                         | 2  | 85048774  | 85134132  | 85359  |
| TRABD2B      | TraB domain containing 2B                                         | 1  | 48226200  | 48462567  | 236368 |
| TRAF2        | TNF receptor associated factor 2                                  | 9  | 139776364 | 139821059 | 44696  |
| TRAF3IP2-AS1 | TRAF3IP2 antisense RNA 1                                          | 6  | 111804714 | 111919505 | 114792 |
| TRAF4        | TNF receptor associated factor 4                                  | 17 | 27071002  | 27077974  | 6973   |
| TRAFD1       | TRAF-type zinc finger domain containing 1                         | 12 | 112563305 | 112591407 | 28103  |
| TRAIIP       | TRAF interacting protein                                          | 3  | 49866034  | 49894007  | 27974  |
| TRAK1        | trafficking kinesin protein 1                                     | 3  | 42055294  | 42267381  | 212088 |
| TRAK2        | trafficking kinesin protein 2                                     | 2  | 202241930 | 202316302 | 74373  |

|              |                                                                                     |    |           |           |        |
|--------------|-------------------------------------------------------------------------------------|----|-----------|-----------|--------|
| TRAM1        | translocation associated membrane protein 1                                         | 8  | 71485677  | 71520622  | 34946  |
| TRAM2-AS1    | TRAM2 antisense RNA 1 (head to head)                                                | 6  | 52442105  | 52448783  | 6679   |
| TRAP1        | TNF receptor associated protein 1                                                   | 16 | 3701640   | 3767598   | 65959  |
| TRAPPC11     | trafficking protein particle complex 11                                             | 4  | 184580420 | 184634745 | 54326  |
| TRAPPC4      | trafficking protein particle complex 4                                              | 11 | 118889142 | 118896164 | 7023   |
| TRAPPC8      | trafficking protein particle complex 8                                              | 18 | 29409136  | 29533099  | 123964 |
| TRAPPC9      | trafficking protein particle complex 9                                              | 8  | 140742586 | 141468678 | 726093 |
| <b>TRDN</b>  | triadin                                                                             | 6  | 123537483 | 123958238 | 420756 |
| TREM2        | triggering receptor expressed on myeloid cells 2                                    | 6  | 41126244  | 41130924  | 4681   |
| TRERF1       | transcriptional regulating factor 1                                                 | 6  | 42192669  | 42419789  | 227121 |
| TREX1        | three prime repair exonuclease 1                                                    | 3  | 48506445  | 48509044  | 2600   |
| TRHDE        | thyrotropin releasing hormone degrading enzyme                                      | 12 | 72481046  | 73059422  | 578377 |
| TRIM11       | tripartite motif containing 11                                                      | 1  | 228581374 | 228594541 | 13168  |
| TRIM16       | tripartite motif containing 16                                                      | 17 | 15531274  | 15587625  | 56352  |
| TRIM2        | tripartite motif containing 2                                                       | 4  | 154073494 | 154260472 | 186979 |
| TRIM24       | tripartite motif containing 24                                                      | 7  | 138145079 | 138274738 | 129660 |
| TRIM25       | tripartite motif containing 25                                                      | 17 | 54965270  | 54991399  | 26130  |
| TRIM33       | tripartite motif containing 33                                                      | 1  | 114935399 | 115053781 | 118383 |
| TRIM37       | tripartite motif containing 37                                                      | 17 | 57059999  | 57184282  | 124284 |
| TRIM5        | tripartite motif containing 5                                                       | 11 | 5684425   | 5959849   | 275425 |
| TRIM55       | tripartite motif containing 55                                                      | 8  | 67039131  | 67087720  | 48590  |
| TRIM66       | tripartite motif containing 66                                                      | 11 | 8633584   | 8693413   | 59830  |
| TRIM9        | tripartite motif containing 9                                                       | 14 | 51441980  | 51562779  | 120800 |
| TRIO         | trio Rho guanine nucleotide exchange factor                                         | 5  | 14143811  | 14532235  | 388425 |
| TRIP12       | thyroid hormone receptor interactor 12                                              | 2  | 230628554 | 230787955 | 159402 |
| TRIP13       | thyroid hormone receptor interactor 13                                              | 5  | 892758    | 919472    | 26715  |
| TRIP4        | thyroid hormone receptor interactor 4                                               | 15 | 64679947  | 64747502  | 67556  |
| TRIT1        | tRNA isopentenyltransferase 1                                                       | 1  | 40306723  | 40349183  | 42461  |
| TRMT2B       | tRNA methyltransferase 2 homolog B                                                  | X  | 100264335 | 100307105 | 42771  |
| TRMT44       | tRNA methyltransferase 44 homolog ( <i>S. cerevisiae</i> )                          | 4  | 8437867   | 8495258   | 57392  |
| TRPC4        | transient receptor potential cation channel subfamily C member 4                    | 13 | 38210773  | 38444562  | 233790 |
| TRPC4AP      | transient receptor potential cation channel subfamily C member 4 associated protein | 20 | 33590207  | 33680674  | 90468  |
| TRPC5        | transient receptor potential cation channel subfamily C member 5                    | X  | 111017543 | 111326004 | 308462 |
| TRPC6        | transient receptor potential cation channel subfamily C member 6                    | 11 | 101322295 | 101743293 | 420999 |
| TRPC7        | transient receptor potential cation channel subfamily C member 7                    | 5  | 135548999 | 135732730 | 183732 |
| TRPM3        | transient receptor potential cation channel subfamily M member 3                    | 9  | 73143979  | 74061820  | 917842 |
| <b>TRPM7</b> | transient receptor potential cation channel subfamily M member 7                    | 15 | 50844670  | 50979012  | 134343 |
| TRPM8        | transient receptor potential cation channel subfamily M member 8                    | 2  | 234826043 | 234928166 | 102124 |
| TRPS1        | transcriptional repressor GATA binding 1                                            | 8  | 116420724 | 116821899 | 401176 |
| TRPV4        | transient receptor potential cation channel subfamily V member 4                    | 12 | 110220890 | 110271212 | 50323  |
| TSC1         | tuberous sclerosis 1                                                                | 9  | 135766735 | 135820020 | 53286  |
| TSC2         | tuberous sclerosis 2                                                                | 16 | 2097466   | 2138716   | 41251  |
| TSC22D2      | TSC22 domain family member 2                                                        | 3  | 150126122 | 150184218 | 58097  |
| TSC22D3      | TSC22 domain family member 3                                                        | X  | 106956451 | 107020572 | 64122  |
| TSG101       | tumor susceptibility 101                                                            | 11 | 18489883  | 18548779  | 58897  |
| TSGA10       | testis specific 10                                                                  | 2  | 99613724  | 99771427  | 157704 |
| TSHZ1        | teashirt zinc finger homeobox 1                                                     | 18 | 72922710  | 73001905  | 79196  |
| TSHZ2        | teashirt zinc finger homeobox 2                                                     | 20 | 51588946  | 52111869  | 522924 |
| TSHZ3        | teashirt zinc finger homeobox 3                                                     | 19 | 31765851  | 31840453  | 74603  |
| TSIX         | TSIX transcript, XIST antisense RNA                                                 | X  | 73012040  | 73049066  | 37027  |
| TSNARE1      | t-SNARE domain containing 1                                                         | 8  | 143293441 | 143484601 | 191161 |
| TSNAX-DISC1  | TSNAX-DISC1 readthrough (NMD candidate)                                             | 1  | 231664399 | 231954990 | 290592 |
| TSPAN18      | tetraspanin 18                                                                      | 11 | 44748015  | 44953972  | 205958 |
| TSPAN5       | tetraspanin 5                                                                       | 4  | 99391518  | 99579780  | 188263 |
| TSPAN7       | tetraspanin 7                                                                       | X  | 38420623  | 38548169  | 127547 |
| TSPAN9       | tetraspanin 9                                                                       | 12 | 3186521   | 3395730   | 209210 |
| TSPPEAR      | thrombospondin type laminin G domain and EAR repeats                                | 21 | 45917775  | 46131495  | 213721 |
| TSSC1        | tumor suppressing subtransferable candidate 1                                       | 2  | 3192696   | 3381653   | 188958 |
| TTBK2        | tau tubulin kinase 2                                                                | 15 | 43030932  | 43213007  | 182076 |
| TTC12        | tetratricopeptide repeat domain 12                                                  | 11 | 113185251 | 113254266 | 69016  |
| TTC13        | tetratricopeptide repeat domain 13                                                  | 1  | 231041989 | 231114621 | 72633  |
| <b>TTC23</b> | tetratricopeptide repeat domain 23                                                  | 15 | 99676528  | 99791428  | 114901 |
| TTC26        | tetratricopeptide repeat domain 26                                                  | 7  | 138818490 | 138876732 | 58243  |
| TTC28        | tetratricopeptide repeat domain 28                                                  | 22 | 28374004  | 29075853  | 701850 |
| TTC28-AS1    | TTC28 antisense RNA 1                                                               | 22 | 28315364  | 28404569  | 89206  |
| TTC29        | tetratricopeptide repeat domain 29                                                  | 4  | 147627790 | 147867034 | 239245 |
| TTC37        | tetratricopeptide repeat domain 37                                                  | 5  | 94799599  | 94890711  | 91113  |
| TTC38        | tetratricopeptide repeat domain 38                                                  | 22 | 46663858  | 46689905  | 26048  |
| TTC7B        | tetratricopeptide repeat domain 7B                                                  | 14 | 91006932  | 91282823  | 275892 |
| TTI1         | TELO2 interacting protein 1                                                         | 20 | 36611409  | 36661870  | 50462  |
| TTK          | TTK protein kinase                                                                  | 6  | 80713604  | 80752244  | 38641  |
| TTL11        | tubulin tyrosine ligase like 11                                                     | 9  | 124584207 | 124855885 | 271679 |
| TTL4         | tubulin tyrosine ligase like 4                                                      | 2  | 219575568 | 219620139 | 44572  |
| TTL5         | tubulin tyrosine ligase like 5                                                      | 14 | 76099968  | 76421421  | 321454 |
| TTL6         | tubulin tyrosine ligase like 6                                                      | 17 | 46839597  | 46894576  | 54980  |
| TTL7         | tubulin tyrosine ligase like 7                                                      | 1  | 84330711  | 84464833  | 134123 |

|               |                                                              |    |           |           |        |
|---------------|--------------------------------------------------------------|----|-----------|-----------|--------|
| TTN           | titin                                                        | 2  | 179390716 | 179695529 | 304814 |
| TTPA          | alpha tocopherol transfer protein                            | 8  | 63961112  | 63998612  | 37501  |
| TTR           | transthyretin                                                | 18 | 29171689  | 29178974  | 7286   |
| TTY10         | testis-specific transcript, Y-linked 10 (non-protein coding) | Y  | 22627554  | 22681114  | 53561  |
| TTY14         | testis-specific transcript, Y-linked 14 (non-protein coding) | Y  | 21034387  | 21239302  | 204916 |
| <b>TUBA4A</b> | tubulin alpha 4a                                             | 2  | 220114433 | 220142892 | 28460  |
| TUBB3         | tubulin beta 3 class III                                     | 16 | 89987800  | 90005169  | 17370  |
| TUBB6         | tubulin beta 6 class V                                       | 18 | 12307668  | 12344319  | 36652  |
| TUBGCP3       | tubulin gamma complex associated protein 3                   | 13 | 113139325 | 113242481 | 103157 |
| TUBGCP4       | tubulin gamma complex associated protein 4                   | 15 | 43661419  | 43699293  | 37875  |
| TULP4         | tubby like protein 4                                         | 6  | 158733692 | 158932860 | 199169 |
| TUSC3         | tumor suppressor candidate 3                                 | 8  | 15274724  | 15624158  | 349435 |
| TWISTNB       | TWIST neighbor                                               | 7  | 19735085  | 19748710  | 13626  |
| TXK           | TXK tyrosine kinase                                          | 4  | 48068410  | 48136273  | 67864  |
| TXLNB         | taxilin beta                                                 | 6  | 139561198 | 139613276 | 52079  |
| TXNL1         | thioredoxin like 1                                           | 18 | 54264439  | 54318831  | 54393  |
| TYR           | tyrosinase                                                   | 11 | 88910620  | 89028927  | 118308 |
| TYW1          | tRNA-yW synthesizing protein 1 homolog                       | 7  | 66460160  | 66704501  | 244342 |
| TYW1B         | tRNA-yW synthesizing protein 1 homolog B                     | 7  | 72023729  | 72298777  | 275049 |
| U2AF2         | U2 small nuclear RNA auxiliary factor 2                      | 19 | 56165512  | 56186081  | 20570  |
| UBA6          | ubiquitin like modifier activating enzyme 6                  | 4  | 68478370  | 68566897  | 88528  |
| UBASH3A       | ubiquitin associated and SH3 domain containing A             | 21 | 43824008  | 43867791  | 43784  |
| UBASH3B       | ubiquitin associated and SH3 domain containing B             | 11 | 122526383 | 122685181 | 158799 |
| UBD           | ubiquitin D                                                  | 6  | 29523292  | 29527702  | 4411   |
| UBE2A         | ubiquitin conjugating enzyme E2 A                            | X  | 118708501 | 118718381 | 9881   |
| UBE2B         | ubiquitin conjugating enzyme E2 B                            | 5  | 133706870 | 133727683 | 20814  |
| UBE2D1        | ubiquitin conjugating enzyme E2 D1                           | 10 | 60094735  | 60130513  | 35779  |
| UBE2E2        | ubiquitin conjugating enzyme E2 E2                           | 3  | 23244511  | 23633284  | 388774 |
| UBE2E3        | ubiquitin conjugating enzyme E2 E3                           | 2  | 181831975 | 181941312 | 109338 |
| UBE2H         | ubiquitin conjugating enzyme E2 H                            | 7  | 129470572 | 129592789 | 122218 |
| <b>UBE2I</b>  | ubiquitin conjugating enzyme E2 I                            | 16 | 1355548   | 1377019   | 21472  |
| UBE2J2        | ubiquitin conjugating enzyme E2 J2                           | 1  | 1189289   | 1209265   | 19977  |
| UBE2L3        | ubiquitin conjugating enzyme E2 L3                           | 22 | 21903736  | 21978323  | 74588  |
| UBE2Q2P1      | ubiquitin conjugating enzyme E2 Q2 pseudogene 1              | 15 | 85070012  | 85114447  | 44436  |
| UBE2R2        | ubiquitin conjugating enzyme E2 R2                           | 9  | 33817565  | 33920402  | 102838 |
| UBE2V1        | ubiquitin conjugating enzyme E2 V1                           | 20 | 48697661  | 48732496  | 34836  |
| UBE2W         | ubiquitin conjugating enzyme E2 W                            | 8  | 74692332  | 74791145  | 98814  |
| UBE3A         | ubiquitin protein ligase E3A                                 | 15 | 25582381  | 25684128  | 101748 |
| UBE3B         | ubiquitin protein ligase E3B                                 | 12 | 109915207 | 109974507 | 59301  |
| UBE3C         | ubiquitin protein ligase E3C                                 | 7  | 156931607 | 157062066 | 130460 |
| UBE3D         | ubiquitin protein ligase E3D                                 | 6  | 83602117  | 83775560  | 173444 |
| <b>UBE4B</b>  | ubiquitination factor E4B                                    | 1  | 10092890  | 10241297  | 148408 |
| UBP1          | upstream binding protein 1 (LBP-1a)                          | 3  | 33429828  | 33482863  | 53036  |
| UBQLN1        | ubiquilin 1                                                  | 9  | 86274878  | 86323118  | 48241  |
| <b>UBQLN2</b> | ubiquilin 2                                                  | X  | 56590026  | 56593443  | 3418   |
| UBQLN4        | ubiquilin 4                                                  | 1  | 156005092 | 156023585 | 18494  |
| UBR1          | ubiquitin protein ligase E3 component n-recogin 1            | 15 | 43235095  | 43398311  | 163217 |
| UBR3          | ubiquitin protein ligase E3 component n-recogin 3 (putative) | 2  | 170683968 | 170940641 | 256674 |
| UBR4          | ubiquitin protein ligase E3 component n-recogin 4            | 1  | 19401000  | 19536770  | 135771 |
| UBR5          | ubiquitin protein ligase E3 component n-recogin 5            | 8  | 103265240 | 103425069 | 159830 |
| UBXN2B        | UBX domain protein 2B                                        | 8  | 59323823  | 59364060  | 40238  |
| UBXN7         | UBX domain protein 7                                         | 3  | 196074533 | 196159345 | 84813  |
| UCA1          | urothelial cancer associated 1 (non-protein coding)          | 19 | 15939771  | 15947130  | 7360   |
| UCHL1         | ubiquitin C-terminal hydrolase L1                            | 4  | 41258430  | 41270472  | 12043  |
| UGGT2         | UDP-glucose glycoprotein glucosyltransferase 2               | 13 | 96453834  | 96705736  | 251903 |
| UGT3A1        | UDP glycosyltransferase family 3 member A1                   | 5  | 35951112  | 36001130  | 50019  |
| UHRF1BP1L     | UHRF1 binding protein 1 like                                 | 12 | 100422233 | 100536626 | 114394 |
| UHRF2         | ubiquitin like with PHD and ring finger domains 2            | 9  | 6413151   | 6507054   | 93904  |
| UIMC1         | ubiquitin interaction motif containing 1                     | 5  | 176332006 | 176449634 | 117629 |
| ULK2          | unc-51 like autophagy activating kinase 2                    | 17 | 19674142  | 19771249  | 97108  |
| ULK4          | unc-51 like kinase 4                                         | 3  | 41288090  | 42003922  | 715833 |
| <b>UNC13A</b> | unc-13 homolog A                                             | 19 | 17712137  | 17799401  | 87265  |
| UNC13B        | unc-13 homolog B                                             | 9  | 35161999  | 35405335  | 243337 |
| UNC13C        | unc-13 homolog C                                             | 15 | 54305101  | 54920806  | 615706 |
| UNC5C         | unc-5 netrin receptor C                                      | 4  | 96083655  | 96470357  | 386703 |
| UNC5D         | unc-5 netrin receptor D                                      | 8  | 35092975  | 35654068  | 561094 |
| UNC79         | unc-79 homolog (C. elegans)                                  | 14 | 93799565  | 94174222  | 374658 |
| UNC80         | unc-80 homolog, NALCN activator                              | 2  | 210636717 | 210864024 | 227308 |
| UNKL          | unkempt family like zinc finger                              | 16 | 1413206   | 1464752   | 51547  |
| UPB1          | beta-ureidopropionase 1                                      | 22 | 24863206  | 24924358  | 61153  |
| UQCC1         | ubiquinol-cytochrome c reductase complex assembly factor 1   | 20 | 33890369  | 33999944  | 109576 |
| URB1          | URB1 ribosome biogenesis 1 homolog (S. cerevisiae)           | 21 | 33683329  | 33765335  | 82007  |
| URB2          | URB2 ribosome biogenesis 2 homolog (S. cerevisiae)           | 1  | 229761981 | 229795946 | 33966  |
| USF1          | upstream transcription factor 1                              | 1  | 161009041 | 161015767 | 6727   |
| USF2          | upstream transcription factor 2, c-fos interacting           | 19 | 35759881  | 35770724  | 10844  |
| USH2A         | usherin                                                      | 1  | 215796236 | 216596738 | 800503 |
| USO1          | USO1 vesicle transport factor                                | 4  | 76649777  | 76735382  | 85606  |

|               |                                                                        |    |           |           |        |
|---------------|------------------------------------------------------------------------|----|-----------|-----------|--------|
| USP10         | ubiquitin specific peptidase 10                                        | 16 | 84733584  | 84813528  | 79945  |
| USP15         | ubiquitin specific peptidase 15                                        | 12 | 62654119  | 62811211  | 157093 |
| USP20         | ubiquitin specific peptidase 20                                        | 9  | 132596977 | 132644107 | 47131  |
| USP24         | ubiquitin specific peptidase 24                                        | 1  | 55532032  | 55680786  | 148755 |
| USP28         | ubiquitin specific peptidase 28                                        | 11 | 113668596 | 113746292 | 77697  |
| USP31         | ubiquitin specific peptidase 31                                        | 16 | 23072727  | 23160591  | 87865  |
| USP32         | ubiquitin specific peptidase 32                                        | 17 | 58256455  | 58499831  | 243377 |
| USP34         | ubiquitin specific peptidase 34                                        | 2  | 61414598  | 61697904  | 283307 |
| USP40         | ubiquitin specific peptidase 40                                        | 2  | 234384166 | 234475428 | 91263  |
| USP48         | ubiquitin specific peptidase 48                                        | 1  | 22004791  | 22110099  | 105309 |
| USP49         | ubiquitin specific peptidase 49                                        | 6  | 41757634  | 41863099  | 105466 |
| <b>USP53</b>  | ubiquitin specific peptidase 53                                        | 4  | 120133742 | 120216672 | 82931  |
| USP54         | ubiquitin specific peptidase 54                                        | 10 | 75257296  | 75385711  | 128416 |
| <b>USP6NL</b> | USP6 N-terminal like                                                   | 10 | 11495945  | 11653753  | 157809 |
| UTP15         | UTP15, small subunit processome component                              | 5  | 72861268  | 72877794  | 16527  |
| UTP6          | UTP6, small subunit processome component                               | 17 | 30187923  | 30228784  | 40862  |
| UTRN          | utrophin                                                               | 6  | 144606837 | 145174170 | 567334 |
| UTY           | ubiquitously transcribed tetratricopeptide repeat containing, Y-linked | Y  | 15360259  | 15592553  | 232295 |
| UVRAG         | UV radiation resistance associated                                     | 11 | 75526212  | 75854239  | 328028 |
| VAC14         | Vac14, PIKFYVE complex component                                       | 16 | 70721342  | 70835064  | 113723 |
| VAMP1         | vesicle associated membrane protein 1                                  | 12 | 6571403   | 6580153   | 8751   |
| VAMP4         | vesicle associated membrane protein 4                                  | 1  | 171669300 | 171711387 | 42088  |
| VAPA          | VAMP associated protein A                                              | 18 | 9913999   | 9960018   | 46020  |
| <b>VAPB</b>   | VAMP associated protein B and C                                        | 20 | 56964178  | 57026157  | 61980  |
| VAV1          | vav guanine nucleotide exchange factor 1                               | 19 | 6772725   | 6857377   | 84653  |
| VAV3          | vav guanine nucleotide exchange factor 3                               | 1  | 108113782 | 108507766 | 393985 |
| VBP1          | VHL binding protein 1                                                  | X  | 154425284 | 154468098 | 42815  |
| VCAN          | versican                                                               | 5  | 82767284  | 82878122  | 110839 |
| <b>VCP</b>    | valosin containing protein                                             | 9  | 35056061  | 35073246  | 17186  |
| VCP1P1        | valosin containing protein interacting protein 1                       | 8  | 67540722  | 67579452  | 38731  |
| VCPKMT        | valosin containing protein lysine methyltransferase                    | 14 | 50575350  | 50583318  | 7969   |
| VDAC1         | voltage dependent anion channel 1                                      | 5  | 133307606 | 133340824 | 33219  |
| <b>VDR</b>    | vitamin D (1,25- dihydroxyvitamin D3) receptor                         | 12 | 48235320  | 48336831  | 101512 |
| <b>VEGFA</b>  | vascular endothelial growth factor A                                   | 6  | 43737921  | 43754224  | 16304  |
| VEPH1         | ventricular zone expressed PH domain containing 1                      | 3  | 156977531 | 157251408 | 273878 |
| VGLL4         | vestigial like family member 4                                         | 3  | 11597544  | 11762220  | 164677 |
| VIL1          | villin 1                                                               | 2  | 219283815 | 219318018 | 34204  |
| VKORC1L1      | vitamin K epoxide reductase complex subunit 1 like 1                   | 7  | 65338254  | 65424550  | 86297  |
| VLDLR         | very low density lipoprotein receptor                                  | 9  | 2621834   | 2660053   | 38220  |
| VMP1          | vacuole membrane protein 1                                             | 17 | 57784553  | 57919616  | 135064 |
| VOPP1         | vesicular, overexpressed in cancer, prosurvival protein 1              | 7  | 55503749  | 55640681  | 136933 |
| VPS13A        | vacuolar protein sorting 13 homolog A                                  | 9  | 79792269  | 80036457  | 244189 |
| VPS13A-AS1    | VPS13A antisense RNA 1                                                 | 9  | 79791672  | 79792910  | 1239   |
| VPS13B        | vacuolar protein sorting 13 homolog B                                  | 8  | 100025494 | 100889808 | 864315 |
| VPS13C        | vacuolar protein sorting 13 homolog C                                  | 15 | 62144588  | 62352672  | 208085 |
| VPS13D        | vacuolar protein sorting 13 homolog D                                  | 1  | 12290124  | 12572099  | 281976 |
| VPS35         | VPS35, retromer complex component                                      | 16 | 46690054  | 46723430  | 33377  |
| VPS37A        | VPS37A, ESCRT-I subunit                                                | 8  | 17104080  | 17159936  | 55857  |
| VPS41         | VPS41, HOPS complex subunit                                            | 7  | 38762563  | 38971994  | 209432 |
| VPS4B         | vacuolar protein sorting 4 homolog B                                   | 18 | 61056423  | 61089716  | 33294  |
| VPS53         | VPS53, GARP complex subunit                                            | 17 | 411908    | 624957    | 213050 |
| <b>VPS54</b>  | VPS54, GARP complex subunit                                            | 2  | 64119280  | 64246206  | 126927 |
| VPS8          | VPS8, CORVET complex subunit                                           | 3  | 184529931 | 184770402 | 240472 |
| VSTM4         | V-set and transmembrane domain containing 4                            | 10 | 50222290  | 50323554  | 101265 |
| <b>VTCN1</b>  | V-set domain containing T-cell activation inhibitor 1                  | 1  | 117686209 | 117753556 | 67348  |
| VTI1A         | vesicle transport through interaction with t-SNAREs 1A                 | 10 | 114206756 | 114578503 | 371748 |
| VWA3B         | von Willebrand factor A domain containing 3B                           | 2  | 98703579  | 98929762  | 226184 |
| VWA5B1        | von Willebrand factor A domain containing 5B1                          | 1  | 20617412  | 20681387  | 63976  |
| VWC2L         | von Willebrand factor C domain containing protein 2 like               | 2  | 215275789 | 215443683 | 167895 |
| VWF           | von Willebrand factor                                                  | 12 | 6058040   | 6233936   | 175897 |
| WAC           | WW domain containing adaptor with coiled-coil                          | 10 | 28821422  | 28912041  | 90620  |
| WARS          | tryptophanyl-tRNA synthetase                                           | 14 | 100800125 | 100843142 | 43018  |
| WARS2         | tryptophanyl tRNA synthetase 2, mitochondrial                          | 1  | 119573839 | 119683294 | 109456 |
| WASF1         | WAS protein family member 1                                            | 6  | 110421022 | 110501207 | 80186  |
| WASF2         | WAS protein family member 2                                            | 1  | 27730730  | 27816669  | 85940  |
| WASF3         | WAS protein family member 3                                            | 13 | 27131840  | 27263085  | 131246 |
| WBSCR17       | Williams-Beuren syndrome chromosome region 17                          | 7  | 70597155  | 71178585  | 581431 |
| WDFY2         | WD repeat and FYVE domain containing 2                                 | 13 | 52158644  | 52336171  | 177528 |
| WDFY3         | WD repeat and FYVE domain containing 3                                 | 4  | 85590704  | 85887544  | 296841 |
| WDFY4         | WDFY family member 4                                                   | 10 | 49892921  | 50191001  | 298081 |
| WDPCP         | WD repeat containing planar cell polarity effector                     | 2  | 63348518  | 64054977  | 706460 |
| WDR13         | WD repeat domain 13                                                    | X  | 48448430  | 48463581  | 15152  |
| WDR27         | WD repeat domain 27                                                    | 6  | 169857307 | 170102159 | 244853 |
| WDR33         | WD repeat domain 33                                                    | 2  | 128458596 | 128568761 | 110166 |
| WDR43         | WD repeat domain 43                                                    | 2  | 29117509  | 29171088  | 53580  |
| WDR44         | WD repeat domain 44                                                    | X  | 117480036 | 117583924 | 103889 |
| WDR45         | WD repeat domain 45                                                    | X  | 48929385  | 48958108  | 28724  |

|         |                                                                                          |    |           |           |         |
|---------|------------------------------------------------------------------------------------------|----|-----------|-----------|---------|
| WDR53   | WD repeat domain 53                                                                      | 3  | 196281056 | 196295545 | 14490   |
| WDR60   | WD repeat domain 60                                                                      | 7  | 158649269 | 158749438 | 100170  |
| WDR62   | WD repeat domain 62                                                                      | 19 | 36545783  | 36596008  | 50226   |
| WDR64   | WD repeat domain 64                                                                      | 1  | 241815580 | 241965435 | 149856  |
| WDR7    | WD repeat domain 7                                                                       | 18 | 54318574  | 54698828  | 380255  |
| WDR70   | WD repeat domain 70                                                                      | 5  | 37379314  | 37753537  | 374224  |
| WDR72   | WD repeat domain 72                                                                      | 15 | 53805938  | 54055075  | 249138  |
| WDR82   | WD repeat domain 82                                                                      | 3  | 52288437  | 52322036  | 33600   |
| WDR93   | WD repeat domain 93                                                                      | 15 | 90234028  | 90286869  | 52842   |
| WDC1    | WD and tetratricopeptide repeats 1                                                       | 1  | 27561007  | 27635110  | 74104   |
| WDYHV1  | WDYHV motif containing 1                                                                 | 8  | 124428965 | 124479470 | 50506   |
| WFDC1   | WAP four-disulfide core domain 1                                                         | 16 | 84328252  | 84363450  | 35199   |
| WFS1    | wolframin ER transmembrane glycoprotein                                                  | 4  | 6271576   | 6304992   | 33417   |
| WHAMMP2 | WAS protein homolog associated with actin, golgi membranes and microtubules pseudogene 2 | 15 | 28982729  | 29002537  | 19809   |
| WIF1    | WNT inhibitory factor 1                                                                  | 12 | 65444406  | 65515346  | 70941   |
| WIPF3   | WAS/WASL interacting protein family member 3                                             | 7  | 29846102  | 29956682  | 110581  |
| WIPI2   | WD repeat domain, phosphoinositide interacting 2                                         | 7  | 5229819   | 5273457   | 43639   |
| WLS     | wntless Wnt ligand secretion mediator                                                    | 1  | 68564142  | 68698803  | 134662  |
| WNK1    | WNK lysine deficient protein kinase 1                                                    | 12 | 861759    | 1020618   | 158860  |
| WNK2    | WNK lysine deficient protein kinase 2                                                    | 9  | 95947198  | 96082854  | 135657  |
| WNT11   | Wnt family member 11                                                                     | 11 | 75897369  | 75921780  | 24412   |
| WNT7B   | Wnt family member 7B                                                                     | 22 | 46316242  | 46373009  | 56768   |
| WNT8B   | Wnt family member 8B                                                                     | 10 | 102222798 | 102243501 | 20704   |
| WT1-AS  | WT1 antisense RNA                                                                        | 11 | 32457064  | 32480315  | 23252   |
| WTAPP1  | Wilms tumor 1 associated protein pseudogene 1                                            | 11 | 102617699 | 102707497 | 89799   |
| WWC1    | WW and C2 domain containing 1                                                            | 5  | 167718656 | 167899308 | 180653  |
| WWC3    | WWC family member 3                                                                      | X  | 9983602   | 10112518  | 128917  |
| WWOX    | WW domain containing oxidoreductase                                                      | 16 | 78133310  | 79246564  | 1113255 |
| XDH     | xanthine dehydrogenase                                                                   | 2  | 31557187  | 31637581  | 80395   |
| XG      | Xg blood group                                                                           | X  | 2670091   | 2734539   | 64449   |
| XIRP2   | xin actin binding repeat containing 2                                                    | 2  | 167744997 | 168116263 | 371267  |
| XKR4    | XK related 4                                                                             | 8  | 56014949  | 56454613  | 439665  |
| XKR6    | XK related 6                                                                             | 8  | 10753555  | 11058875  | 305321  |
| XPA     | XPA, DNA damage recognition and repair factor                                            | 9  | 100437191 | 100459639 | 22449   |
| XPC     | XPC complex subunit, DNA damage recognition and repair factor                            | 3  | 14186647  | 14220283  | 33637   |
| XPNPEP2 | X-prolyl aminopeptidase 2                                                                | X  | 128872950 | 128903514 | 30565   |
| XPNPEP3 | X-prolyl aminopeptidase 3                                                                | 22 | 41253081  | 41363838  | 110758  |
| XPO5    | exportin 5                                                                               | 6  | 43490072  | 43543812  | 53741   |
| XPO6    | exportin 6                                                                               | 16 | 28109300  | 28223241  | 113942  |
| XPO7    | exportin 7                                                                               | 8  | 21777180  | 21864096  | 86917   |
| XPR1    | xenotropic and polytropic retrovirus receptor 1                                          | 1  | 180601140 | 180859387 | 258248  |
| XRCC1   | X-ray repair cross complementing 1                                                       | 19 | 44047192  | 44084625  | 37434   |
| XRCC3   | X-ray repair cross complementing 3                                                       | 14 | 104163946 | 104181841 | 17896   |
| XRCC5   | X-ray repair cross complementing 5                                                       | 2  | 216972187 | 217071026 | 98840   |
| XRCC6P5 | X-ray repair cross complementing 6 pseudogene 5                                          | X  | 98716600  | 98976156  | 259557  |
| XRN1    | 5'-3' exoribonuclease 1                                                                  | 3  | 142025449 | 142166904 | 141456  |
| XXYL1   | xyloside xylosyltransferase 1                                                            | 3  | 194789008 | 194991896 | 202889  |
| XYLT1   | xylosyltransferase 1                                                                     | 16 | 17195626  | 17564738  | 369113  |
| YAF2    | YY1 associated factor 2                                                                  | 12 | 42550906  | 42632151  | 81246   |
| YARS    | tyrosyl-tRNA synthetase                                                                  | 1  | 33240840  | 33283754  | 42915   |
| YES1    | YES proto-oncogene 1, Src family tyrosine kinase                                         | 18 | 721588    | 812547    | 90960   |
| YIPF7   | Yip1 domain family member 7                                                              | 4  | 44624086  | 44680573  | 56488   |
| YME1L1  | YME1 like 1 ATPase                                                                       | 10 | 27399383  | 27444195  | 44813   |
| YTHDC1  | YTH domain containing 1                                                                  | 4  | 69176105  | 69215807  | 39703   |
| YTHDF1  | YTH N6-methyladenosine RNA binding protein 1                                             | 20 | 61826781  | 61847586  | 20806   |
| YWHAH   | tyrosine 3-monooxygenase/tryptophan 5-monooxygenase activation protein gamma             | 7  | 75956116  | 75988348  | 32233   |
| YWHAH   | tyrosine 3-monooxygenase/tryptophan 5-monooxygenase activation protein eta               | 22 | 32340447  | 32353590  | 13144   |
| ZBBX    | zinc finger B-box domain containing                                                      | 3  | 166958075 | 167099134 | 141060  |
| ZBTB16  | zinc finger and BTB domain containing 16                                                 | 11 | 113930315 | 114121398 | 191084  |
| ZBTB20  | zinc finger and BTB domain containing 20                                                 | 3  | 114056941 | 114866118 | 809178  |
| ZBTB26  | zinc finger and BTB domain containing 26                                                 | 9  | 125677845 | 125693779 | 15935   |
| ZBTB37  | zinc finger and BTB domain containing 37                                                 | 1  | 173837220 | 173872687 | 35468   |
| ZBTB41  | zinc finger and BTB domain containing 41                                                 | 1  | 197122810 | 197169672 | 46863   |
| ZBTB44  | zinc finger and BTB domain containing 44                                                 | 11 | 130096572 | 130184581 | 88010   |
| ZBTB46  | zinc finger and BTB domain containing 46                                                 | 20 | 62375019  | 62462597  | 87579   |
| ZBTB7C  | zinc finger and BTB domain containing 7C                                                 | 18 | 45553044  | 45937123  | 384080  |
| ZBTB8A  | zinc finger and BTB domain containing 8A                                                 | 1  | 33005028  | 33071540  | 66513   |
| ZBTB8B  | zinc finger and BTB domain containing 8B                                                 | 1  | 32930670  | 32962287  | 31618   |
| ZC2HC1C | zinc finger C2HC-type containing 1C                                                      | 14 | 75530873  | 75545126  | 14254   |
| ZC3H12D | zinc finger CCCH-type containing 12D                                                     | 6  | 149768794 | 149806197 | 37404   |
| ZC3H13  | zinc finger CCCH-type containing 13                                                      | 13 | 46528600  | 46626894  | 98295   |
| ZC3H18  | zinc finger CCCH-type containing 18                                                      | 16 | 88636789  | 88698374  | 61586   |
| ZC3H7A  | zinc finger CCCH-type containing 7A                                                      | 16 | 11844442  | 11891123  | 46682   |
| ZCCHC11 | zinc finger CCHC-type containing 11                                                      | 1  | 52873954  | 53019159  | 145206  |

|                |                                                  |    |           |           |        |
|----------------|--------------------------------------------------|----|-----------|-----------|--------|
| ZCCHC14        | zinc finger CCHC-type containing 14              | 16 | 87439852  | 87525651  | 85800  |
| ZCCHC24        | zinc finger CCHC-type containing 24              | 10 | 81142081  | 81205383  | 63303  |
| ZCCHC4         | zinc finger CCHC-type containing 4               | 4  | 25314407  | 25372005  | 57599  |
| ZCCHC7         | zinc finger CCHC-type containing 7               | 9  | 37120536  | 37358146  | 237611 |
| ZCWPW1         | zinc finger CW-type and PWWP domain containing 1 | 7  | 99998449  | 100026615 | 28167  |
| ZCWPW2         | zinc finger CW-type and PWWP domain containing 2 | 3  | 28390637  | 28579613  | 188977 |
| ZDHHC1         | zinc finger DHHC-type containing 1               | 16 | 67428322  | 67450736  | 22415  |
| ZDHHC13        | zinc finger DHHC-type containing 13              | 11 | 19138646  | 19197969  | 59324  |
| ZDHHC14        | zinc finger DHHC-type containing 14              | 6  | 157802165 | 158099178 | 297014 |
| ZDHHC15        | zinc finger DHHC-type containing 15              | X  | 74588262  | 74743337  | 155076 |
| ZDHHC17        | zinc finger DHHC-type containing 17              | 12 | 77157368  | 77247476  | 90109  |
| ZDHHC5         | zinc finger DHHC-type containing 5               | 11 | 57435219  | 57468659  | 33441  |
| ZEB1           | zinc finger E-box binding homeobox 1             | 10 | 31607424  | 31818742  | 211319 |
| ZEB2           | zinc finger E-box binding homeobox 2             | 2  | 145141648 | 145282147 | 140500 |
| ZFAND2A        | zinc finger AN1-type containing 2A               | 7  | 1191707   | 1200395   | 8689   |
| ZFAND3         | zinc finger AN1-type containing 3                | 6  | 37787275  | 38122400  | 335126 |
| ZFAND5         | zinc finger AN1-type containing 5                | 9  | 74966341  | 74980163  | 13823  |
| ZFAND6         | zinc finger AN1-type containing 6                | 15 | 80351910  | 80430735  | 78826  |
| ZFAT           | zinc finger and AT-hook domain containing        | 8  | 135490031 | 135725292 | 235262 |
| ZFHX3          | zinc finger homeobox 3                           | 16 | 72816784  | 73093597  | 276814 |
| <b>ZFP14</b>   | ZFP14 zinc finger protein                        | 19 | 36827162  | 36870101  | 42940  |
| ZFP3           | ZFP3 zinc finger protein                         | 17 | 4981543   | 4999669   | 18127  |
| <b>ZFP64</b>   | ZFP64 zinc finger protein                        | 20 | 50668202  | 50820847  | 152646 |
| ZFP90          | ZFP90 zinc finger protein                        | 16 | 68563993  | 68609975  | 45983  |
| ZFP91-CNTF     | ZFP91-CNTF readthrough (NMD candidate)           | 11 | 58346645  | 58392112  | 45468  |
| ZFPM2          | zinc finger protein, FOG family member 2         | 8  | 106330920 | 106816760 | 485841 |
| ZFR            | zinc finger RNA binding protein                  | 5  | 32354456  | 32444867  | 90412  |
| ZFYVE26        | zinc finger FYVE-type containing 26              | 14 | 68194091  | 68283307  | 89217  |
| ZFYVE27        | zinc finger FYVE-type containing 27              | 10 | 99496878  | 99520664  | 23787  |
| ZFYVE28        | zinc finger FYVE-type containing 28              | 4  | 2271309   | 2420390   | 149082 |
| ZHX3           | zinc fingers and homeoboxes 3                    | 20 | 39807088  | 39946312  | 139225 |
| ZMAT1          | zinc finger matrin-type 1                        | X  | 101137262 | 101187004 | 49743  |
| ZMAT4          | zinc finger matrin-type 4                        | 8  | 40388109  | 40755352  | 367244 |
| ZMYM6          | zinc finger MYM-type containing 6                | 1  | 35449523  | 35497569  | 48047  |
| ZNF10          | zinc finger protein 10                           | 12 | 133707161 | 133736051 | 28891  |
| ZNF106         | zinc finger protein 106                          | 15 | 42705021  | 42783321  | 78301  |
| ZNF12          | zinc finger protein 12                           | 7  | 6728064   | 6746554   | 18491  |
| ZNF135         | zinc finger protein 135                          | 19 | 58570607  | 58597677  | 27071  |
| ZNF14          | zinc finger protein 14                           | 19 | 19821280  | 19843906  | 22627  |
| ZNF143         | zinc finger protein 143                          | 11 | 9481866   | 9550071   | 68206  |
| ZNF148         | zinc finger protein 148                          | 3  | 124944405 | 125094198 | 149794 |
| ZNF180         | zinc finger protein 180                          | 19 | 44979854  | 45004576  | 24723  |
| ZNF182         | zinc finger protein 182                          | X  | 47834250  | 47863377  | 29128  |
| ZNF19          | zinc finger protein 19                           | 16 | 71498453  | 71598992  | 100540 |
| ZNF200         | zinc finger protein 200                          | 16 | 3272325   | 3286221   | 13897  |
| ZNF223         | zinc finger protein 223                          | 19 | 44555520  | 44572144  | 16625  |
| ZNF236         | zinc finger protein 236                          | 18 | 74534563  | 74682683  | 148121 |
| ZNF248         | zinc finger protein 248                          | 10 | 38091751  | 38147034  | 55284  |
| ZNF25          | zinc finger protein 25                           | 10 | 38238500  | 38265561  | 27062  |
| ZNF251         | zinc finger protein 251                          | 8  | 145946298 | 145981802 | 35505  |
| ZNF280C        | zinc finger protein 280C                         | X  | 129336685 | 129402873 | 66189  |
| ZNF286B        | zinc finger protein 286B                         | 17 | 18561742  | 18585575  | 23834  |
| ZNF287         | zinc finger protein 287                          | 17 | 16454701  | 16472520  | 17820  |
| ZNF292         | zinc finger protein 292                          | 6  | 87862551  | 87973914  | 111364 |
| ZNF318         | zinc finger protein 318                          | 6  | 43274872  | 43337216  | 62345  |
| ZNF35          | zinc finger protein 35                           | 3  | 44690219  | 44702283  | 12065  |
| ZNF385B        | zinc finger protein 385B                         | 2  | 180306709 | 180726232 | 419524 |
| ZNF385D        | zinc finger protein 385D                         | 3  | 21459915  | 22414812  | 954898 |
| ZNF407         | zinc finger protein 407                          | 18 | 72265106  | 72777627  | 512522 |
| ZNF41          | zinc finger protein 41                           | X  | 47305278  | 47342345  | 37068  |
| ZNF423         | zinc finger protein 423                          | 16 | 49521435  | 49891830  | 370396 |
| ZNF438         | zinc finger protein 438                          | 10 | 31109136  | 31320866  | 211731 |
| ZNF490         | zinc finger protein 490                          | 19 | 12688775  | 12750912  | 62138  |
| ZNF503         | zinc finger protein 503                          | 10 | 77157588  | 77161664  | 4077   |
| ZNF507         | zinc finger protein 507                          | 19 | 32836500  | 32878573  | 42074  |
| <b>ZNF512B</b> | zinc finger protein 512B                         | 20 | 62588055  | 62680113  | 92059  |
| ZNF518B        | zinc finger protein 518B                         | 4  | 10441498  | 10459034  | 17537  |
| ZNF521         | zinc finger protein 521                          | 18 | 22641890  | 22932154  | 290265 |
| ZNF534         | zinc finger protein 534                          | 19 | 52932440  | 52955568  | 23129  |
| ZNF536         | zinc finger protein 536                          | 19 | 30719197  | 31204445  | 485249 |
| ZNF541         | zinc finger protein 541                          | 19 | 48023942  | 48059113  | 35172  |
| <b>ZNF556</b>  | zinc finger protein 556                          | 19 | 2867333   | 2878515   | 11183  |
| ZNF560         | zinc finger protein 560                          | 19 | 9577183   | 9609283   | 32101  |
| ZNF567         | zinc finger protein 567                          | 19 | 37178514  | 37218603  | 40090  |
| <b>ZNF578</b>  | zinc finger protein 578                          | 19 | 52956829  | 53015407  | 58579  |
| ZNF585A        | zinc finger protein 585A                         | 19 | 37597636  | 37663643  | 66008  |
| ZNF596         | zinc finger protein 596                          | 8  | 182137    | 197342    | 15206  |

|               |                                                 |    |           |           |        |
|---------------|-------------------------------------------------|----|-----------|-----------|--------|
| ZNF597        | zinc finger protein 597                         | 16 | 3486104   | 3493542   | 7439   |
| ZNF622        | zinc finger protein 622                         | 5  | 16451628  | 16465901  | 14274  |
| ZNF638        | zinc finger protein 638                         | 2  | 71503691  | 71662199  | 158509 |
| ZNF644        | zinc finger protein 644                         | 1  | 91380859  | 91487829  | 106971 |
| ZNF652        | zinc finger protein 652                         | 17 | 47366568  | 47439835  | 73268  |
| ZNF677        | zinc finger protein 677                         | 19 | 53731577  | 53758151  | 26575  |
| ZNF678        | zinc finger protein 678                         | 1  | 227751244 | 227865144 | 113901 |
| <b>ZNF682</b> | zinc finger protein 682                         | 19 | 20107867  | 20150315  | 42449  |
| ZNF691        | zinc finger protein 691                         | 1  | 43312280  | 43318148  | 5869   |
| ZNF697        | zinc finger protein 697                         | 1  | 120162045 | 120190396 | 28352  |
| ZNF704        | zinc finger protein 704                         | 8  | 81540686  | 81787016  | 246331 |
| ZNF710        | zinc finger protein 710                         | 15 | 90544624  | 90625438  | 80815  |
| ZNF718        | zinc finger protein 718                         | 4  | 124386    | 157779    | 33394  |
| ZNF721        | zinc finger protein 721                         | 4  | 419604    | 492945    | 73342  |
| <b>ZNF746</b> | zinc finger protein 746                         | 7  | 149169885 | 149194908 | 25024  |
| ZNF75D        | zinc finger protein 75D                         | X  | 134382867 | 134478012 | 95146  |
| ZNF786        | zinc finger protein 786                         | 7  | 148766735 | 148787874 | 21140  |
| ZNF800        | zinc finger protein 800                         | 7  | 126986844 | 127071978 | 85135  |
| ZNF804A       | zinc finger protein 804A                        | 2  | 185463093 | 185804219 | 341127 |
| ZNF804B       | zinc finger protein 804B                        | 7  | 88388682  | 88966346  | 577665 |
| ZNF815P       | zinc finger protein 815, pseudogene             | 7  | 5862791   | 5894066   | 31276  |
| ZNF827        | zinc finger protein 827                         | 4  | 146678779 | 146859787 | 181009 |
| ZNF843        | zinc finger protein 843                         | 16 | 31445569  | 31454346  | 8778   |
| ZNF862        | zinc finger protein 862                         | 7  | 149535456 | 149564568 | 29113  |
| ZNF99         | zinc finger protein 99                          | 19 | 22939007  | 22966909  | 27903  |
| ZNHIT6        | zinc finger HIT-type containing 6               | 1  | 86115106  | 86174116  | 59011  |
| ZNRF3         | zinc and ring finger 3                          | 22 | 29279580  | 29453475  | 173896 |
| ZP1           | zona pellucida glycoprotein 1                   | 11 | 60635035  | 60643166  | 8132   |
| ZRANB3        | zinc finger RANBP2-type containing 3            | 2  | 135894486 | 136288806 | 394321 |
| ZSWIM2        | zinc finger SWIM-type containing 2              | 2  | 187692562 | 187713935 | 21374  |
| <b>ZSWIM7</b> | zinc finger SWIM-type containing 7              | 17 | 15879874  | 15903031  | 23158  |
| <b>ZUFSP</b>  | zinc finger with UFM1 specific peptidase domain | 6  | 116956781 | 116989957 | 33177  |
| ZWLCH         | zwilch kinetochore protein                      | 15 | 66797297  | 66842115  | 44819  |
| ZWINT         | ZW10 interacting kinetochore protein            | 10 | 58116989  | 58121036  | 4048   |
| ZYG11B        | zyg-11 family member B, cell cycle regulator    | 1  | 53192126  | 53293014  | 100889 |



Supplementary Table 3. Comparison of the data obtained for 5 selected genes by *NeuroArray* aCGH analysis and Real-Time RT-PCR

| Gene ID | SALS1                     |                         | SALS2                     |                         | <i>NeuroArray</i> probe ID | Forward primer (5'-3') | Reverse primer (5'-3')    |
|---------|---------------------------|-------------------------|---------------------------|-------------------------|----------------------------|------------------------|---------------------------|
|         | aCGH<br>(Median LogRatio) | RT-PCR<br>(ddCt method) | aCGH<br>(Median LogRatio) | RT-PCR<br>(ddCt method) |                            |                        |                           |
| GAA     | 0.50                      | 1.52                    | -                         | -                       | A_16_P34263128             | GCGTGCGGGTTGTTCTCT     | CCACGCTGTAGAGTGGGGAC      |
| KIF1A   | 0.71                      | 2.22                    | 0.73                      | 3.26                    | A_16_P00630878             | CAACAGAGACAGACAAGGAGCC | TGTCTCCCAAGTATGAGGGTC     |
| CSF1    | -                         | -                       | 0.92                      | 1.30                    | A_16_P30247855             | GTAGACCAGGAACAGTTGGTGA | ACCCATGGATCCTCACACTCT     |
| TRAF2   | -                         | -                       | 0.78                      | 1.66                    | A_16_P32584215             | AGATCTCAGACTTCGCCAGGA  | TTGGGAGCCATCCTATGTGGT     |
| HSPA5   | -1.21                     | -2.02                   | -1.17                     | -1.63                   | A_16_P32536366             | CAAGCAACCAAAGACGCTGG   | GCTGCCGTACTATTAGATTGAAAAA |

Supplementary Table 4. Chromosomal regions with amplifications and deletions present in > 10% of SALS patients.

| Duplications |           |           |                       |               | Deletions  |          |          |                       |               |
|--------------|-----------|-----------|-----------------------|---------------|------------|----------|----------|-----------------------|---------------|
| Chromosome   | Start     | Stop      | Aberration Size (bps) | Frequency (%) | Chromosome | Start    | Stop     | Aberration Size (bps) | Frequency (%) |
| 14           | 31552632  | 31552690  | 59                    | 76.666664     | 20         | 33986975 | 35569474 | 1582500               | 80            |
| 17           | 17716576  | 17720711  | 4136                  | 70            | 1          | 47767175 | 47770585 | 3411                  | 76.666664     |
| X            | 122318451 | 122320113 | 1663                  | 60            | 20         | 35569474 | 35575306 | 5833                  | 76.666664     |
| 17           | 17720711  | 17726812  | 6102                  | 56.666668     | 3          | 1.56E+08 | 1.56E+08 | 8949                  | 73.333336     |
| X            | 122318291 | 122318451 | 161                   | 56.666668     | 1          | 47716828 | 47767175 | 50348                 | 70            |
| X            | 122320113 | 122336599 | 16487                 | 56.666668     | 1          | 47770585 | 47770755 | 171                   | 70            |
| X            | 122318031 | 122318291 | 261                   | 53.333332     | 3          | 1.56E+08 | 1.56E+08 | 3669                  | 70            |
| 9            | 131388073 | 131394672 | 6600                  | 50            | 3          | 1.56E+08 | 1.56E+08 | 58                    | 70            |
| 7            | 100493729 | 100493862 | 134                   | 46.666668     | 1          | 47435653 | 47716828 | 281176                | 63.333332     |
| 17           | 17726812  | 17726864  | 53                    | 46.666668     | 1          | 47770755 | 47775972 | 5218                  | 63.333332     |
| 22           | 24376158  | 24384300  | 8143                  | 46.666668     | 2          | 32339724 | 32409410 | 69687                 | 63.333332     |
| 9            | 129376726 | 129455813 | 79088                 | 43.333332     | 2          | 32323849 | 32339724 | 15876                 | 60            |
| 19           | 50766570  | 50795492  | 28923                 | 43.333332     | 2          | 32409410 | 32429834 | 20425                 | 60            |
| X            | 122336599 | 122459975 | 123377                | 43.333332     | 9          | 1.28E+08 | 1.28E+08 | 607                   | 60            |
| 2            | 241657356 | 241728764 | 71409                 | 40            | 2          | 32314495 | 32323849 | 9355                  | 56.666668     |
| 9            | 129272014 | 129376726 | 104713                | 40            | 2          | 32429834 | 32432100 | 2267                  | 56.666668     |
| 9            | 129455813 | 129458220 | 2408                  | 40            | 3          | 1.56E+08 | 1.56E+08 | 103                   | 56.666668     |
| 2            | 127807997 | 128431400 | 623404                | 36.666668     | 9          | 1.28E+08 | 1.28E+08 | 122189                | 56.666668     |
| 7            | 100488043 | 100490289 | 2247                  | 36.666668     | 12         | 1.12E+08 | 1.12E+08 | 34973                 | 56.666668     |
| 7            | 100493373 | 100493729 | 357                   | 36.666668     | 1          | 46685884 | 47435653 | 749770                | 53.333332     |
| 17           | 17715816  | 17716576  | 761                   | 36.666668     | 1          | 47775972 | 47776133 | 162                   | 53.333332     |
| 2            | 128431400 | 128439169 | 7770                  | 33.333332     | 3          | 1.56E+08 | 1.56E+08 | 101                   | 53.333332     |
| 7            | 100490289 | 100493373 | 3085                  | 33.333332     | 5          | 69372472 | 70247951 | 875480                | 53.333332     |
| 10           | 99511112  | 99519055  | 7944                  | 33.333332     | 10         | 1.21E+08 | 1.21E+08 | 421                   | 53.333332     |
| 19           | 50795492  | 50795529  | 38                    | 33.333332     | 12         | 1.12E+08 | 1.12E+08 | 2539                  | 53.333332     |
| 5            | 176857805 | 176869527 | 11723                 | 30            | 14         | 92527804 | 92560197 | 32394                 | 53.333332     |
| 9            | 131394672 | 131395293 | 622                   | 30            | 2          | 32312639 | 32314495 | 1857                  | 50            |
| 10           | 99504592  | 99511112  | 6521                  | 30            | 5          | 69372317 | 69372472 | 156                   | 50            |
| 17           | 17726864  | 17740072  | 13209                 | 30            | 10         | 1.21E+08 | 1.21E+08 | 111447                | 50            |
| 19           | 50795529  | 50796566  | 1038                  | 30            | 12         | 1.12E+08 | 1.12E+08 | 38                    | 50            |
| 20           | 23614298  | 23618518  | 4221                  | 30            | 16         | 46697028 | 46703042 | 6015                  | 50            |
| X            | 153127628 | 153602907 | 475280                | 30            | 2          | 32312627 | 32312639 | 13                    | 46.666668     |
| 1            | 55331123  | 55527185  | 196063                | 26.666666     | 2          | 32432100 | 32434737 | 2638                  | 46.666668     |
| 1            | 208202135 | 208257698 | 55564                 | 26.666666     | 14         | 92525408 | 92527804 | 2397                  | 46.666668     |
| 2            | 127806098 | 127807997 | 1900                  | 26.666666     | 14         | 92560197 | 92562372 | 2176                  | 46.666668     |
| 5            | 37834861  | 37834984  | 124                   | 26.666666     | 16         | 46696885 | 46697028 | 144                   | 46.666668     |
| 9            | 129191716 | 129272014 | 80299                 | 26.666666     | 17         | 2541457  | 2569364  | 27908                 | 46.666668     |
| 9            | 129458220 | 129458296 | 77                    | 26.666666     | 17         | 9117815  | 9134199  | 16385                 | 46.666668     |
| 15           | 89381841  | 90198653  | 816813                | 26.666666     | 22         | 32156586 | 32188108 | 31523                 | 46.666668     |
| 17           | 56350271  | 56357941  | 7671                  | 26.666666     | 15         | 50924954 | 50955264 | 30311                 | 43.333332     |
| 20           | 62037795  | 62599159  | 561365                | 26.666666     | 16         | 46695793 | 46696885 | 1093                  | 43.333332     |
| X            | 122459975 | 122460062 | 88                    | 26.666666     | 17         | 2569364  | 2569504  | 141                   | 43.333332     |
| 1            | 2337815   | 6557050   | 4219236               | 23.333334     | 22         | 32154622 | 32156586 | 1965                  | 43.333332     |
| 1            | 165218854 | 165377453 | 158600                | 23.333334     | 22         | 32188108 | 32200902 | 12795                 | 43.333332     |
| 1            | 205012286 | 205041558 | 29273                 | 23.333334     | 2          | 64143925 | 64169715 | 25791                 | 40            |
| 1            | 208201489 | 208202135 | 647                   | 23.333334     | 3          | 1.56E+08 | 1.56E+08 | 2765                  | 40            |
| 5            | 176853852 | 176857805 | 3954                  | 23.333334     | 15         | 50911927 | 50924954 | 13028                 | 40            |
| 14           | 105238845 | 105259939 | 21095                 | 23.333334     | 15         | 50955264 | 50975081 | 19818                 | 40            |
| 16           | 28488776  | 28502793  | 14018                 | 23.333334     | 16         | 46694461 | 46695793 | 1333                  | 40            |
| 17           | 77086157  | 77097800  | 11644                 | 23.333334     | 17         | 2541347  | 2541457  | 111                   | 40            |
| 19           | 50760516  | 50766570  | 6055                  | 23.333334     | 18         | 9117738  | 9117815  | 78                    | 40            |
| 20           | 23618518  | 23618656  | 139                   | 23.333334     | 22         | 32154613 | 32154622 | 10                    | 40            |
| 20           | 61992392  | 62037795  | 45404                 | 23.333334     | 22         | 32200902 | 32205658 | 4757                  | 40            |
| Y            | 4114337   | 8158564   | 4044228               | 23.333334     | 2          | 64169715 | 64169735 | 21                    | 36.666668     |
| 1            | 16348551  | 22216964  | 5868414               | 20            | 2          | 64169735 | 64193249 | 23515                 | 36.666668     |
| 1            | 165175298 | 165218854 | 43557                 | 20            | 6          | 32486277 | 32489896 | 3620                  | 36.666668     |
| 1            | 165377453 | 165377539 | 87                    | 20            | 12         | 1.12E+08 | 1.12E+08 | 156                   | 36.666668     |
| 2            | 128439169 | 128439407 | 239                   | 20            | 14         | 92413787 | 92525408 | 111622                | 36.666668     |
| 2            | 241656421 | 241657356 | 936                   | 20            | 16         | 46703042 | 46712898 | 9857                  | 36.666668     |
| 5            | 37834984  | 37835437  | 454                   | 20            | 22         | 32205658 | 32206586 | 929                   | 36.666668     |
| 6            | 31919858  | 32148778  | 228921                | 20            | 2          | 64124630 | 64143925 | 19296                 | 33.333332     |
| 7            | 4823028   | 4830775   | 7748                  | 20            | 2          | 64193249 | 64199380 | 6132                  | 33.333332     |
| 9            | 87283500  | 87284663  | 1164                  | 20            | 5          | 70247951 | 70307077 | 59127                 | 33.333332     |
| 11           | 17415944  | 17450206  | 34263                 | 20            | 5          | 70307077 | 70307124 | 48                    | 33.333332     |
| 15           | 89346786  | 89381841  | 35056                 | 20            | 6          | 32485872 | 32486277 | 406                   | 33.333332     |
| 16           | 28502793  | 28503629  | 837                   | 20            | 6          | 32489896 | 32489935 | 40                    | 33.333332     |
| 17           | 77097800  | 77099247  | 1448                  | 20            | 15         | 21200700 | 22432687 | 1231988               | 33.333332     |
| 19           | 50364748  | 50760516  | 395769                | 20            | 17         | 2569504  | 2580007  | 10504                 | 33.333332     |
| 19           | 50796566  | 50836689  | 40124                 | 20            | 1          | 63876791 | 63885210 | 8420                  | 30            |
| 20           | 1963661   | 2384209   | 420549                | 20            | 2          | 64119802 | 64124630 | 4829                  | 30            |
| Y            | 18149636  | 21882048  | 3732413               | 20            | 5          | 70307124 | 70309855 | 2732                  | 30            |
| 1            | 22216964  | 22222489  | 5526                  | 16.666666     | 10         | 70432579 | 70441196 | 8618                  | 30            |
| 1            | 165377539 | 165378926 | 1388                  | 16.666666     | 12         | 1.12E+08 | 1.12E+08 | 29476                 | 30            |
| 1            | 205041558 | 205041736 | 179                   | 16.666666     | 15         | 22432687 | 23044610 | 611924                | 30            |
| 1            | 208257698 | 208257977 | 280                   | 16.666666     | 15         | 50872974 | 50911927 | 38954                 | 30            |
| 2            | 20818975  | 20850933  | 31959                 | 16.666666     | 16         | 46712898 | 46713139 | 242                   | 30            |
| 2            | 241728764 | 241737212 | 8449                  | 16.666666     | 17         | 2580007  | 4605227  | 2025221               | 30            |
| 4            | 102268216 | 102315609 | 47394                 | 16.666666     | 17         | 19753054 | 19769087 | 16034                 | 30            |
| 5            | 137777186 | 137781394 | 4209                  | 16.666666     | 20         | 33834793 | 33986975 | 152183                | 30            |
| 5            | 168179999 | 168180168 | 170                   | 16.666666     | 22         | 32206586 | 32206711 | 126                   | 30            |

|    |           |           |         |           |    |          |          |         |           |
|----|-----------|-----------|---------|-----------|----|----------|----------|---------|-----------|
| 6  | 32485851  | 32485872  | 22      | 16.666666 | 1  | 63836485 | 63876791 | 40307   | 26.666666 |
| 6  | 32485872  | 32486277  | 406     | 16.666666 | 1  | 63885210 | 63902525 | 17316   | 26.666666 |
| 6  | 32486277  | 32489896  | 3620    | 16.666666 | 1  | 2.47E+08 | 2.47E+08 | 140     | 26.666666 |
| 6  | 32489896  | 32489935  | 40      | 16.666666 | 5  | 70309855 | 70320678 | 10824   | 26.666666 |
| 7  | 2281893   | 4823028   | 2541136 | 16.666666 | 6  | 32485851 | 32485872 | 22      | 26.666666 |
| 8  | 144635580 | 145024441 | 388862  | 16.666666 | 7  | 22771002 | 23017142 | 246141  | 26.666666 |
| 9  | 87284663  | 87285883  | 1221    | 16.666666 | 10 | 76154068 | 76768859 | 614792  | 26.666666 |
| 9  | 138594020 | 138641871 | 47852   | 16.666666 | 14 | 1.04E+08 | 1.04E+08 | 62601   | 26.666666 |
| 9  | 138660447 | 138661983 | 1537    | 16.666666 | 15 | 20575646 | 21200700 | 625055  | 26.666666 |
| 11 | 2161421   | 2161583   | 163     | 16.666666 | 15 | 44912321 | 44951263 | 38943   | 26.666666 |
| 11 | 17408294  | 17415944  | 7651    | 16.666666 | 17 | 19752773 | 19753054 | 282     | 26.666666 |
| 11 | 17450206  | 17464859  | 14654   | 16.666666 | 17 | 19769087 | 19769218 | 132     | 26.666666 |
| 12 | 57587270  | 57605854  | 18585   | 16.666666 | 17 | 30212981 | 30226829 | 13849   | 26.666666 |
| 15 | 42678271  | 42695967  | 17697   | 16.666666 | 1  | 63836432 | 63836485 | 54      | 23.333334 |
| 16 | 57685031  | 57698265  | 13235   | 16.666666 | 1  | 63902525 | 63903304 | 780     | 23.333334 |
| 17 | 17740072  | 17740236  | 165     | 16.666666 | 1  | 2.08E+08 | 2.08E+08 | 19860   | 23.333334 |
| 17 | 75369546  | 77086157  | 1716612 | 16.666666 | 5  | 70320678 | 71554990 | 1234313 | 23.333334 |
| 17 | 77099247  | 78092622  | 993376  | 16.666666 | 6  | 32485173 | 32485851 | 679     | 23.333334 |
| 19 | 50364607  | 50364748  | 142     | 16.666666 | 7  | 23017142 | 23017909 | 768     | 23.333334 |
| 20 | 2384209   | 2411082   | 26874   | 16.666666 | 9  | 1.35E+08 | 1.35E+08 | 33833   | 23.333334 |
| 22 | 37622611  | 37640194  | 17584   | 16.666666 | 10 | 76099253 | 76154068 | 54816   | 23.333334 |
| Y  | 8158564   | 8694578   | 536015  | 16.666666 | 11 | 85714533 | 85737381 | 22849   | 23.333334 |
| Y  | 17890214  | 18149636  | 259423  | 16.666666 | 14 | 1.04E+08 | 1.04E+08 | 27229   | 23.333334 |
| Y  | 21882048  | 22086267  | 204220  | 16.666666 | 14 | 1.04E+08 | 1.04E+08 | 178091  | 23.333334 |
| 1  | 22222489  | 22222904  | 416     | 13.333333 | 15 | 23044610 | 23046598 | 1989    | 23.333334 |
| 1  | 208257977 | 208276459 | 18483   | 13.333333 | 15 | 44900781 | 44912321 | 11541   | 23.333334 |
| 1  | 227075891 | 227173012 | 97122   | 13.333333 | 15 | 50849380 | 50872974 | 23595   | 23.333334 |
| 4  | 41700207  | 41748255  | 48049   | 13.333333 | 16 | 46693906 | 46694461 | 556     | 23.333334 |
| 4  | 102315609 | 103422921 | 1107313 | 13.333333 | 17 | 19741803 | 19752773 | 10971   | 23.333334 |
| 5  | 37824072  | 37834861  | 10790   | 13.333333 | 17 | 29110052 | 29114424 | 4373    | 23.333334 |
| 5  | 137776953 | 137777186 | 234     | 13.333333 | 17 | 30190437 | 30212981 | 22545   | 23.333334 |
| 5  | 137781394 | 137781792 | 399     | 13.333333 | 17 | 30226829 | 30228745 | 1917    | 23.333334 |
| 5  | 168233667 | 168620579 | 386913  | 13.333333 | 17 | 30228745 | 30326197 | 97453   | 23.333334 |
| 6  | 32148778  | 32149461  | 684     | 13.333333 | 18 | 9134199  | 9134357  | 159     | 23.333334 |
| 6  | 32166526  | 32191834  | 25309   | 13.333333 | 1  | 47776133 | 47778637 | 2505    | 20        |
| 6  | 32485173  | 32485851  | 679     | 13.333333 | 1  | 2.08E+08 | 2.08E+08 | 2109    | 20        |
| 6  | 32489935  | 32489967  | 33      | 13.333333 | 1  | 2.47E+08 | 2.47E+08 | 6692    | 20        |
| 7  | 2281791   | 2281893   | 103     | 13.333333 | 6  | 31783348 | 31797880 | 14533   | 20        |
| 8  | 42037953  | 42065260  | 27308   | 13.333333 | 6  | 32412763 | 32485173 | 72411   | 20        |
| 8  | 145024441 | 145049522 | 25082   | 13.333333 | 6  | 74303319 | 74351597 | 48279   | 20        |
| 9  | 136390729 | 138594020 | 2203292 | 13.333333 | 9  | 1.08E+08 | 1.08E+08 | 289     | 20        |
| 9  | 138641871 | 138660447 | 18577   | 13.333333 | 9  | 1.27E+08 | 1.28E+08 | 1188578 | 20        |
| 9  | 138661983 | 140062358 | 1400376 | 13.333333 | 9  | 1.35E+08 | 1.35E+08 | 7254    | 20        |
| 11 | 792284    | 2161421   | 1369138 | 13.333333 | 10 | 75960468 | 76099253 | 138786  | 20        |
| 11 | 2161583   | 4056596   | 1895014 | 13.333333 | 11 | 77814989 | 77815111 | 123     | 20        |
| 11 | 4056596   | 7324468   | 3267873 | 13.333333 | 11 | 85714505 | 85714533 | 29      | 20        |
| 11 | 17464859  | 17470241  | 5383    | 13.333333 | 12 | 32778695 | 32786500 | 7806    | 20        |
| 11 | 45906997  | 45907487  | 491     | 13.333333 | 12 | 1.12E+08 | 1.12E+08 | 2013    | 20        |
| 12 | 125348132 | 125348422 | 291     | 13.333333 | 15 | 23046598 | 23048496 | 1899    | 20        |
| 14 | 99641841  | 100193575 | 551735  | 13.333333 | 15 | 44951263 | 44952618 | 1356    | 20        |
| 15 | 42695967  | 42703427  | 7461    | 13.333333 | 15 | 93487795 | 93489253 | 1459    | 20        |
| 15 | 50978890  | 51201129  | 222240  | 13.333333 | 17 | 19729339 | 19741803 | 12465   | 20        |
| 16 | 1250785   | 1359337   | 108553  | 13.333333 | 17 | 29114424 | 29123314 | 8891    | 20        |
| 16 | 10273981  | 10276571  | 2591    | 13.333333 | 17 | 30190276 | 30190437 | 162     | 20        |
| 16 | 57653630  | 57685031  | 31402   | 13.333333 | 17 | 30326197 | 30327458 | 1262    | 20        |
| 17 | 8791519   | 8794231   | 2713    | 13.333333 | 17 | 44302758 | 44302802 | 45      | 20        |
| 17 | 75277604  | 75369546  | 91943   | 13.333333 | 1  | 44173154 | 44201940 | 28787   | 16.666666 |
| 20 | 60718894  | 60718952  | 59      | 13.333333 | 1  | 1.74E+08 | 1.74E+08 | 29292   | 16.666666 |
| 20 | 61987803  | 61992392  | 4590    | 13.333333 | 1  | 2.47E+08 | 2.47E+08 | 3431    | 16.666666 |
| 21 | 44495820  | 44496400  | 581     | 13.333333 | 1  | 2.47E+08 | 2.47E+08 | 5171    | 16.666666 |
| 22 | 24384300  | 24828385  | 444086  | 13.333333 | 2  | 32434737 | 32610141 | 175405  | 16.666666 |
| 22 | 37621845  | 37622611  | 767     | 13.333333 | 2  | 2.22E+08 | 2.22E+08 | 77      | 16.666666 |
| Y  | 8694578   | 9072145   | 377568  | 13.333333 | 5  | 61645975 | 61657411 | 11437   | 16.666666 |
| Y  | 17493425  | 17890214  | 396790  | 13.333333 | 5  | 69288477 | 69372317 | 83841   | 16.666666 |
| Y  | 22086267  | 23799790  | 1713524 | 13.333333 | 6  | 31797880 | 31865577 | 67698   | 16.666666 |
| 1  | 1956561   | 2337815   | 381255  | 10        | 6  | 32489935 | 32489967 | 33      | 16.666666 |
| 1  | 22222904  | 22379326  | 156423  | 10        | 6  | 74351597 | 74354308 | 2712    | 16.666666 |
| 1  | 55527185  | 55529886  | 2702    | 10        | 8  | 94777910 | 94793916 | 16007   | 16.666666 |
| 1  | 65854982  | 65855380  | 399     | 10        | 9  | 1.08E+08 | 1.08E+08 | 15844   | 16.666666 |
| 1  | 110280992 | 110467801 | 186810  | 10        | 9  | 1.26E+08 | 1.27E+08 | 742981  | 16.666666 |
| 1  | 156060447 | 156851294 | 790848  | 10        | 9  | 1.28E+08 | 1.28E+08 | 128     | 16.666666 |
| 1  | 165175086 | 165175298 | 213     | 10        | 9  | 1.35E+08 | 1.35E+08 | 2167    | 16.666666 |
| 1  | 165378926 | 165406335 | 27410   | 10        | 9  | 1.35E+08 | 1.35E+08 | 1452    | 16.666666 |
| 1  | 204124931 | 205012286 | 887356  | 10        | 10 | 94373202 | 94405187 | 31986   | 16.666666 |
| 1  | 208276459 | 208417579 | 141121  | 10        | 10 | 96540191 | 96580305 | 40115   | 16.666666 |
| 1  | 227058314 | 227075891 | 17578   | 10        | 11 | 77814020 | 77814989 | 970     | 16.666666 |
| 2  | 20818280  | 20818975  | 696     | 10        | 12 | 32751551 | 32778695 | 27145   | 16.666666 |
| 2  | 74589902  | 74590293  | 392     | 10        | 14 | 50597479 | 50666488 | 69010   | 16.666666 |
| 2  | 74596602  | 74603884  | 7283    | 10        | 15 | 23048496 | 23052587 | 4092    | 16.666666 |
| 2  | 127805579 | 127806098 | 520     | 10        | 15 | 41535920 | 41562793 | 26874   | 16.666666 |
| 2  | 152954807 | 152955141 | 335     | 10        | 15 | 44898259 | 44900781 | 2523    | 16.666666 |
| 2  | 171673289 | 171687463 | 14175   | 10        | 15 | 50975081 | 50978890 | 3810    | 16.666666 |
| 3  | 128202684 | 128212098 | 9415    | 10        | 15 | 50978890 | 51285562 | 306673  | 16.666666 |
| 4  | 41216529  | 41259802  | 43274   | 10        | 15 | 64226370 | 65275796 | 1049427 | 16.666666 |
| 4  | 102100184 | 102268216 | 168033  | 10        | 15 | 78732085 | 78770736 | 38652   | 16.666666 |
| 4  | 184580356 | 184580630 | 275     | 10        | 15 | 93487634 | 93487795 | 162     | 16.666666 |

|    |           |           |         |    |    |          |          |         |           |
|----|-----------|-----------|---------|----|----|----------|----------|---------|-----------|
| 5  | 37835437  | 37835564  | 128     | 10 | 17 | 29123314 | 29123434 | 121     | 16.666666 |
| 5  | 121412746 | 121647970 | 235225  | 10 | 17 | 29663929 | 29667773 | 3845    | 16.666666 |
| 5  | 167719205 | 168179999 | 460795  | 10 | 17 | 44270188 | 44270247 | 60      | 16.666666 |
| 5  | 168180168 | 168233667 | 53500   | 10 | 17 | 44270247 | 44302758 | 32512   | 16.666666 |
| 5  | 168620579 | 168678536 | 57958   | 10 | 17 | 61560736 | 61560846 | 111     | 16.666666 |
| 6  | 29910241  | 29910772  | 532     | 10 | 22 | 32206711 | 32215105 | 8395    | 16.666666 |
| 6  | 32149461  | 32166526  | 17066   | 10 | 1  | 1.74E+08 | 1.74E+08 | 38      | 13.333333 |
| 6  | 32191834  | 32191906  | 73      | 10 | 1  | 1.74E+08 | 1.74E+08 | 933     | 13.333333 |
| 7  | 100487735 | 100488043 | 309     | 10 | 1  | 1.86E+08 | 1.86E+08 | 14397   | 13.333333 |
| 8  | 145049522 | 145050879 | 1358    | 10 | 1  | 2.08E+08 | 2.08E+08 | 1585    | 13.333333 |
| 9  | 35068399  | 35072760  | 4362    | 10 | 1  | 2.08E+08 | 2.08E+08 | 381214  | 13.333333 |
| 9  | 87283404  | 87283500  | 97      | 10 | 1  | 2.47E+08 | 2.47E+08 | 49107   | 13.333333 |
| 9  | 131395293 | 131395544 | 252     | 10 | 2  | 39249998 | 39286024 | 36027   | 13.333333 |
| 9  | 135810367 | 136390729 | 580363  | 10 | 2  | 61223914 | 61848845 | 624932  | 13.333333 |
| 11 | 424565    | 792284    | 367720  | 10 | 3  | 1.56E+08 | 1.56E+08 | 11871   | 13.333333 |
| 11 | 7324468   | 7324653   | 186     | 10 | 4  | 1810306  | 3434075  | 1623770 | 13.333333 |
| 11 | 45907487  | 45925785  | 18299   | 10 | 4  | 84193142 | 84200133 | 6992    | 13.333333 |
| 11 | 117263667 | 117265845 | 2179    | 10 | 5  | 61645765 | 61645975 | 211     | 13.333333 |
| 12 | 57549817  | 57587270  | 37454   | 10 | 5  | 61657411 | 61682922 | 25512   | 13.333333 |
| 12 | 57605854  | 57606775  | 922     | 10 | 5  | 68911643 | 69288477 | 376835  | 13.333333 |
| 13 | 51483764  | 51484234  | 471     | 10 | 5  | 71554990 | 72337850 | 782861  | 13.333333 |
| 15 | 27017550  | 27018935  | 1386    | 10 | 6  | 31777500 | 31783348 | 5849    | 13.333333 |
| 15 | 42703427  | 42703603  | 177     | 10 | 6  | 32412626 | 32412763 | 138     | 13.333333 |
| 16 | 1203457   | 1245002   | 41546   | 10 | 6  | 73497268 | 74303319 | 806052  | 13.333333 |
| 16 | 1359337   | 2147716   | 788380  | 10 | 8  | 38092084 | 38099747 | 7664    | 13.333333 |
| 16 | 7703763   | 7715070   | 11308   | 10 | 8  | 94767910 | 94777910 | 10001   | 13.333333 |
| 16 | 10273832  | 10273981  | 150     | 10 | 8  | 94793916 | 94830376 | 36461   | 13.333333 |
| 16 | 57698265  | 57698622  | 358     | 10 | 9  | 1.35E+08 | 1.35E+08 | 87      | 13.333333 |
| 16 | 74808415  | 74808756  | 342     | 10 | 10 | 94369290 | 94373202 | 3913    | 13.333333 |
| 17 | 1648642   | 1658070   | 9429    | 10 | 10 | 94405187 | 94409813 | 4627    | 13.333333 |
| 17 | 8790922   | 8791519   | 598     | 10 | 11 | 77812193 | 77814020 | 1828    | 13.333333 |
| 17 | 17715423  | 17715816  | 394     | 10 | 11 | 85714349 | 85714505 | 157     | 13.333333 |
| 17 | 17740236  | 17872902  | 132667  | 10 | 12 | 32751385 | 32751551 | 167     | 13.333333 |
| 17 | 26698927  | 26711380  | 12454   | 10 | 12 | 32786500 | 32797205 | 10706   | 13.333333 |
| 17 | 34198604  | 34417495  | 218892  | 10 | 14 | 50666488 | 50666621 | 134     | 13.333333 |
| 17 | 56349278  | 56350271  | 994     | 10 | 15 | 41562793 | 41961373 | 398581  | 13.333333 |
| 17 | 56357941  | 56358113  | 173     | 10 | 15 | 44892847 | 44898259 | 5413    | 13.333333 |
| 19 | 1000387   | 1549191   | 548805  | 10 | 15 | 51285562 | 51293272 | 7711    | 13.333333 |
| 19 | 50836689  | 50885869  | 49181   | 10 | 15 | 63673002 | 64226370 | 553369  | 13.333333 |
| 20 | 1963574   | 1963661   | 88      | 10 | 15 | 65275796 | 65276001 | 206     | 13.333333 |
| 20 | 2411082   | 2636794   | 225713  | 10 | 15 | 78770736 | 78834731 | 63996   | 13.333333 |
| 20 | 3869789   | 3870396   | 608     | 10 | 16 | 46713139 | 46715275 | 2137    | 13.333333 |
| 20 | 60718952  | 61987803  | 1268852 | 10 | 17 | 19728497 | 19729339 | 843     | 13.333333 |
| 21 | 43693384  | 44495820  | 802437  | 10 | 17 | 34151164 | 34169312 | 18149   | 13.333333 |
| 21 | 44496400  | 46931240  | 2434841 | 10 | 17 | 44270027 | 44270188 | 162     | 13.333333 |
| 22 | 18907140  | 18918487  | 11348   | 10 | 22 | 40758971 | 42373034 | 1614064 | 13.333333 |
| 22 | 42486755  | 42526821  | 40067   | 10 | 22 | 42373034 | 42373060 | 27      | 13.333333 |
| X  | 47433998  | 53321220  | 5887223 | 10 | 1  | 1.74E+08 | 1.75E+08 | 725691  | 10        |
| X  | 62875495  | 63005325  | 129831  | 10 | 1  | 1.86E+08 | 1.86E+08 | 3400    | 10        |
| X  | 153602907 | 153911715 | 308809  | 10 | 1  | 1.86E+08 | 1.86E+08 | 58      | 10        |
| Y  | 23799790  | 24108431  | 308642  | 10 | 1  | 2.06E+08 | 2.06E+08 | 5482    | 10        |
|    |           |           |         |    | 1  | 2.08E+08 | 2.08E+08 | 224     | 10        |
|    |           |           |         |    | 1  | 2.08E+08 | 2.08E+08 | 1314    | 10        |
|    |           |           |         |    | 1  | 2.47E+08 | 2.47E+08 | 156     | 10        |
|    |           |           |         |    | 2  | 9658018  | 9683500  | 25483   | 10        |
|    |           |           |         |    | 2  | 32289292 | 32312627 | 23336   | 10        |
|    |           |           |         |    | 2  | 39240588 | 39249998 | 9411    | 10        |
|    |           |           |         |    | 2  | 39286024 | 39294884 | 8861    | 10        |
|    |           |           |         |    | 2  | 60834239 | 61223914 | 389676  | 10        |
|    |           |           |         |    | 2  | 61848845 | 64119802 | 2270958 | 10        |
|    |           |           |         |    | 3  | 1.56E+08 | 1.57E+08 | 1088256 | 10        |
|    |           |           |         |    | 4  | 84200133 | 84205674 | 5542    | 10        |
|    |           |           |         |    | 5  | 68711926 | 68911643 | 199718  | 10        |
|    |           |           |         |    | 5  | 72337850 | 72660687 | 322838  | 10        |
|    |           |           |         |    | 6  | 31625489 | 31777500 | 152012  | 10        |
|    |           |           |         |    | 6  | 74354308 | 74530628 | 176321  | 10        |
|    |           |           |         |    | 7  | 1.57E+08 | 1.57E+08 | 487530  | 10        |
|    |           |           |         |    | 8  | 38099747 | 38099800 | 54      | 10        |
|    |           |           |         |    | 8  | 94830376 | 94831418 | 1043    | 10        |
|    |           |           |         |    | 9  | 39140211 | 41979303 | 2839093 | 10        |
|    |           |           |         |    | 9  | 1.28E+08 | 1.28E+08 | 566     | 10        |
|    |           |           |         |    | 9  | 1.31E+08 | 1.31E+08 | 7978    | 10        |
|    |           |           |         |    | 10 | 94215352 | 94333786 | 118435  | 10        |
|    |           |           |         |    | 10 | 94333786 | 94369290 | 35505   | 10        |
|    |           |           |         |    | 10 | 94409813 | 94415113 | 5301    | 10        |
|    |           |           |         |    | 10 | 1.02E+08 | 1.02E+08 | 4014    | 10        |
|    |           |           |         |    | 11 | 63486224 | 63523594 | 37371   | 10        |
|    |           |           |         |    | 11 | 77812064 | 77812193 | 130     | 10        |
|    |           |           |         |    | 11 | 85687650 | 85714349 | 26700   | 10        |
|    |           |           |         |    | 11 | 1.08E+08 | 1.08E+08 | 30441   | 10        |
|    |           |           |         |    | 12 | 32797205 | 34591668 | 1794464 | 10        |
|    |           |           |         |    | 14 | 50596637 | 50597479 | 843     | 10        |
|    |           |           |         |    | 14 | 50666621 | 50671026 | 4406    | 10        |
|    |           |           |         |    | 14 | 73822253 | 73876874 | 54622   | 10        |
|    |           |           |         |    | 15 | 20190548 | 20575646 | 385099  | 10        |
|    |           |           |         |    | 15 | 23052587 | 23060821 | 8235    | 10        |

|    |          |          |         |    |
|----|----------|----------|---------|----|
| 15 | 63579805 | 63673002 | 93198   | 10 |
| 16 | 70551635 | 70553577 | 1943    | 10 |
| 17 | 19728354 | 19728497 | 144     | 10 |
| 17 | 29123434 | 29124350 | 917     | 10 |
| 17 | 29667773 | 29669971 | 2199    | 10 |
| 17 | 29704134 | 30190276 | 486143  | 10 |
| 17 | 34151035 | 34151164 | 130     | 10 |
| 17 | 34169312 | 34169542 | 231     | 10 |
| 17 | 44248362 | 44269718 | 21357   | 10 |
| 17 | 44269718 | 44270027 | 310     | 10 |
| 17 | 44302802 | 44788332 | 485531  | 10 |
| 19 | 11200038 | 11230886 | 30849   | 10 |
| 19 | 37207281 | 38919986 | 1712706 | 10 |
| 20 | 43059979 | 44350752 | 1290774 | 10 |
| 21 | 44496313 | 44496400 | 88      | 10 |
| 22 | 40758929 | 40758971 | 43      | 10 |
| 22 | 42373060 | 42373066 | 7       | 10 |
| X  | 40460110 | 41599792 | 1139683 | 10 |
| X  | 1.2E+08  | 1.2E+08  | 3840    | 10 |

---

Supplementary Table 5. Chromosomal regions with gains and losses present in > 10% of SALS1 patients.

| Duplications |          |          |                       |               | Deletions  |          |          |                       |               |
|--------------|----------|----------|-----------------------|---------------|------------|----------|----------|-----------------------|---------------|
| Chromosome   | Start    | Stop     | Aberration Size (bps) | Frequency (%) | Chromosome | Start    | Stop     | Aberration Size (bps) | Frequency (%) |
| 14           | 31552632 | 31552690 | 59                    | 76.47059      | 1          | 47716828 | 47775972 | 59145                 | 88.23529      |
| 17           | 17716576 | 17720711 | 4136                  | 70.588234     | 20         | 33986975 | 35569474 | 1582500               | 88.23529      |
| X            | 1.22E+08 | 1.22E+08 | 18149                 | 70.588234     | 20         | 35569474 | 35575306 | 5833                  | 82.35294      |
| X            | 1.22E+08 | 1.22E+08 | 161                   | 64.70588      | 1          | 47435653 | 47716828 | 281176                | 76.47059      |
| 7            | 1E+08    | 1E+08    | 134                   | 58.82353      | 2          | 32339724 | 32429834 | 90111                 | 76.47059      |
| X            | 1.22E+08 | 1.22E+08 | 261                   | 58.82353      | 3          | 1.56E+08 | 1.56E+08 | 8949                  | 76.47059      |
| X            | 1.22E+08 | 1.22E+08 | 123377                | 58.82353      | 9          | 1.28E+08 | 1.28E+08 | 607                   | 76.47059      |
| 17           | 17720711 | 17726812 | 6102                  | 52.941177     | 1          | 47775972 | 47776133 | 162                   | 70.588234     |
| 7            | 1E+08    | 1E+08    | 2247                  | 47.058823     | 2          | 32323849 | 32339724 | 15876                 | 70.588234     |
| 7            | 1E+08    | 1E+08    | 357                   | 47.058823     | 2          | 32429834 | 32432100 | 2267                  | 70.588234     |
| 9            | 1.31E+08 | 1.31E+08 | 6600                  | 47.058823     | 3          | 1.56E+08 | 1.56E+08 | 3669                  | 70.588234     |
| 17           | 17726812 | 17726864 | 53                    | 47.058823     | 3          | 1.56E+08 | 1.56E+08 | 58                    | 70.588234     |
| 7            | 1E+08    | 1E+08    | 3085                  | 41.17647      | 9          | 1.28E+08 | 1.28E+08 | 122189                | 70.588234     |
| 19           | 50766570 | 50795492 | 28923                 | 41.17647      | 1          | 46685884 | 47435653 | 749770                | 64.70588      |
| 2            | 2.42E+08 | 2.42E+08 | 71409                 | 35.294117     | 2          | 32314495 | 32323849 | 9355                  | 64.70588      |
| 9            | 1.29E+08 | 1.29E+08 | 79088                 | 35.294117     | 3          | 1.56E+08 | 1.56E+08 | 101                   | 64.70588      |
| X            | 1.22E+08 | 1.22E+08 | 88                    | 35.294117     | 5          | 69372472 | 70247951 | 875480                | 64.70588      |
| 2            | 1.28E+08 | 1.28E+08 | 623404                | 29.411764     | 10         | 1.21E+08 | 1.21E+08 | 421                   | 64.70588      |
| 9            | 1.29E+08 | 1.29E+08 | 104713                | 29.411764     | 2          | 32312639 | 32314495 | 1857                  | 58.82353      |
| 9            | 1.29E+08 | 1.29E+08 | 2408                  | 29.411764     | 3          | 1.56E+08 | 1.56E+08 | 103                   | 58.82353      |
| 9            | 1.31E+08 | 1.31E+08 | 622                   | 29.411764     | 5          | 69372317 | 69372472 | 156                   | 58.82353      |
| 10           | 99511112 | 99519055 | 7944                  | 29.411764     | 10         | 1.21E+08 | 1.21E+08 | 111447                | 58.82353      |
| 17           | 17726864 | 17740072 | 13209                 | 29.411764     | 12         | 1.12E+08 | 1.12E+08 | 35010                 | 58.82353      |
| 22           | 24376158 | 24384300 | 8143                  | 29.411764     | 14         | 92527804 | 92560197 | 32394                 | 58.82353      |
| 2            | 1.28E+08 | 1.28E+08 | 7770                  | 23.529411     | 2          | 32312627 | 32312639 | 13                    | 52.941177     |
| 5            | 37834861 | 37835437 | 577                   | 23.529411     | 2          | 32432100 | 32434737 | 2638                  | 52.941177     |
| 9            | 1.29E+08 | 1.29E+08 | 77                    | 23.529411     | 5          | 70247951 | 70307124 | 59174                 | 52.941177     |
| 10           | 99504592 | 99511112 | 6521                  | 23.529411     | 12         | 1.12E+08 | 1.12E+08 | 2539                  | 52.941177     |
| 17           | 17715816 | 17716576 | 761                   | 23.529411     | 14         | 92525408 | 92527804 | 2397                  | 52.941177     |
| 17           | 56350271 | 56357941 | 7671                  | 23.529411     | 16         | 46697028 | 46703042 | 6015                  | 52.941177     |
| 17           | 77086157 | 77097800 | 11644                 | 23.529411     | 22         | 32156586 | 32188108 | 31523                 | 52.941177     |
| 19           | 50795492 | 50796566 | 1075                  | 23.529411     | 2          | 64143925 | 64169715 | 25791                 | 47.058823     |
| X            | 1.53E+08 | 1.54E+08 | 475280                | 23.529411     | 3          | 1.56E+08 | 1.56E+08 | 2765                  | 47.058823     |
| 1            | 1.65E+08 | 1.65E+08 | 158600                | 17.647058     | 5          | 70307124 | 70309855 | 2732                  | 47.058823     |
| 1            | 2.05E+08 | 2.05E+08 | 29273                 | 17.647058     | 14         | 92560197 | 92562372 | 2176                  | 47.058823     |
| 1            | 2.08E+08 | 2.08E+08 | 56210                 | 17.647058     | 15         | 50924954 | 50975081 | 50128                 | 47.058823     |
| 2            | 1.28E+08 | 1.28E+08 | 1900                  | 17.647058     | 16         | 46696885 | 46697028 | 144                   | 47.058823     |
| 2            | 1.28E+08 | 1.28E+08 | 239                   | 17.647058     | 17         | 2541457  | 2569364  | 27908                 | 47.058823     |
| 2            | 2.42E+08 | 2.42E+08 | 936                   | 17.647058     | 22         | 32154622 | 32156586 | 1965                  | 47.058823     |
| 2            | 2.42E+08 | 2.42E+08 | 8449                  | 17.647058     | 22         | 32188108 | 32200902 | 12795                 | 47.058823     |
| 5            | 1.68E+08 | 1.68E+08 | 170                   | 17.647058     | 2          | 64124630 | 64143925 | 19296                 | 41.17647      |
| 5            | 1.77E+08 | 1.77E+08 | 11723                 | 17.647058     | 2          | 64169715 | 64169735 | 21                    | 41.17647      |
| 9            | 1.29E+08 | 1.29E+08 | 80299                 | 17.647058     | 2          | 64169735 | 64193249 | 23515                 | 41.17647      |
| 15           | 89381841 | 90198653 | 816813                | 17.647058     | 5          | 70309855 | 70320678 | 10824                 | 41.17647      |
| 17           | 17740072 | 17740236 | 165                   | 17.647058     | 6          | 32486277 | 32489896 | 3620                  | 41.17647      |
| 17           | 34198604 | 34417495 | 218892                | 17.647058     | 12         | 1.12E+08 | 1.12E+08 | 156                   | 41.17647      |
| 17           | 77097800 | 77099247 | 1448                  | 17.647058     | 15         | 50911927 | 50924954 | 13028                 | 41.17647      |
| 20           | 1963661  | 2384209  | 420549                | 17.647058     | 16         | 46694461 | 46696885 | 2425                  | 41.17647      |
| 20           | 23614298 | 23618518 | 4221                  | 17.647058     | 17         | 2541347  | 2541457  | 111                   | 41.17647      |
| 22           | 18907140 | 18918487 | 11348                 | 17.647058     | 17         | 2569364  | 2569504  | 141                   | 41.17647      |
| Y            | 4114337  | 8158564  | 4044228               | 17.647058     | 20         | 33834793 | 33986975 | 152183                | 41.17647      |
| Y            | 18149636 | 21882048 | 3732413               | 17.647058     | 22         | 32154613 | 32154622 | 10                    | 41.17647      |
| 1            | 2337815  | 6557050  | 4219236               | 11.764706     | 22         | 32200902 | 32205658 | 4757                  | 41.17647      |
| 1            | 16348551 | 22222904 | 5874354               | 11.764706     | 1          | 63876791 | 63885210 | 8420                  | 35.294117     |
| 1            | 55331123 | 55527185 | 196063                | 11.764706     | 1          | 2.47E+08 | 2.47E+08 | 140                   | 35.294117     |
| 1            | 1.65E+08 | 1.65E+08 | 43557                 | 11.764706     | 2          | 64119802 | 64124630 | 4829                  | 35.294117     |
| 1            | 1.65E+08 | 1.65E+08 | 1474                  | 11.764706     | 2          | 64193249 | 64199380 | 6132                  | 35.294117     |
| 1            | 2.04E+08 | 2.05E+08 | 887356                | 11.764706     | 5          | 70320678 | 71554990 | 1234313               | 35.294117     |
| 1            | 2.05E+08 | 2.05E+08 | 179                   | 11.764706     | 6          | 32485872 | 32486277 | 406                   | 35.294117     |
| 2            | 20818975 | 20850933 | 31959                 | 11.764706     | 6          | 32489896 | 32489935 | 40                    | 35.294117     |
| 2            | 74596602 | 74603884 | 7283                  | 11.764706     | 7          | 22771002 | 23017142 | 246141                | 35.294117     |
| 2            | 1.28E+08 | 1.28E+08 | 520                   | 11.764706     | 12         | 1.12E+08 | 1.12E+08 | 29476                 | 35.294117     |
| 4            | 41700207 | 41748255 | 48049                 | 11.764706     | 14         | 92413787 | 92525408 | 111622                | 35.294117     |
| 4            | 1.02E+08 | 1.02E+08 | 47394                 | 11.764706     | 14         | 1.04E+08 | 1.04E+08 | 62601                 | 35.294117     |
| 5            | 37824072 | 37834861 | 10790                 | 11.764706     | 15         | 21200700 | 22432687 | 1231988               | 35.294117     |
| 5            | 37835437 | 37835564 | 128                   | 11.764706     | 15         | 50872974 | 50911927 | 38954                 | 35.294117     |
| 5            | 1.38E+08 | 1.38E+08 | 4840                  | 11.764706     | 16         | 46703042 | 46712898 | 9857                  | 35.294117     |
| 6            | 31919858 | 32148778 | 228921                | 11.764706     | 17         | 19753054 | 19769087 | 16034                 | 35.294117     |
| 6            | 32485851 | 32485872 | 22                    | 11.764706     | 18         | 9117738  | 9134199  | 16462                 | 35.294117     |
| 6            | 32485872 | 32486277 | 406                   | 11.764706     | 22         | 32205658 | 32206586 | 929                   | 35.294117     |
| 6            | 32486277 | 32489896 | 3620                  | 11.764706     | 1          | 47776133 | 47778637 | 2505                  | 29.411764     |

|    |          |          |         |           |    |          |          |         |           |
|----|----------|----------|---------|-----------|----|----------|----------|---------|-----------|
| 6  | 32489896 | 32489935 | 40      | 11.764706 | 1  | 63836432 | 63876791 | 40360   | 29.411764 |
| 6  | 32489935 | 32489967 | 33      | 11.764706 | 1  | 63885210 | 63902525 | 17316   | 29.411764 |
| 6  | 32489967 | 32498046 | 8080    | 11.764706 | 6  | 31783348 | 31797880 | 14533   | 29.411764 |
| 6  | 1.53E+08 | 1.53E+08 | 764     | 11.764706 | 7  | 23017142 | 23017909 | 768     | 29.411764 |
| 7  | 4823028  | 4830775  | 7748    | 11.764706 | 9  | 1.27E+08 | 1.28E+08 | 1188578 | 29.411764 |
| 7  | 94953690 | 94983307 | 29618   | 11.764706 | 10 | 76099253 | 76768859 | 669607  | 29.411764 |
| 7  | 1E+08    | 1E+08    | 309     | 11.764706 | 11 | 85714505 | 85737381 | 22877   | 29.411764 |
| 8  | 42037953 | 42065260 | 27308   | 11.764706 | 14 | 1.04E+08 | 1.04E+08 | 27229   | 29.411764 |
| 8  | 1.45E+08 | 1.45E+08 | 388862  | 11.764706 | 14 | 1.04E+08 | 1.04E+08 | 178091  | 29.411764 |
| 9  | 87283500 | 87284663 | 1164    | 11.764706 | 15 | 20575646 | 21200700 | 625055  | 29.411764 |
| 9  | 1.39E+08 | 1.39E+08 | 47852   | 11.764706 | 15 | 22432687 | 23046598 | 613912  | 29.411764 |
| 9  | 1.39E+08 | 1.39E+08 | 1537    | 11.764706 | 15 | 93487634 | 93489253 | 1620    | 29.411764 |
| 10 | 99504442 | 99504592 | 151     | 11.764706 | 17 | 2569504  | 4605227  | 2035724 | 29.411764 |
| 11 | 2161421  | 2161583  | 163     | 11.764706 | 17 | 19741803 | 19753054 | 11252   | 29.411764 |
| 11 | 1.17E+08 | 1.17E+08 | 2179    | 11.764706 | 17 | 19769087 | 19769218 | 132     | 29.411764 |
| 12 | 52096760 | 52145163 | 48404   | 11.764706 | 17 | 30190437 | 30226829 | 36393   | 29.411764 |
| 12 | 57587270 | 57605854 | 18585   | 11.764706 | 22 | 32206586 | 32206711 | 126     | 29.411764 |
| 12 | 1.03E+08 | 1.03E+08 | 60690   | 11.764706 | 1  | 63902525 | 63903304 | 780     | 23.529411 |
| 14 | 1.05E+08 | 1.05E+08 | 21095   | 11.764706 | 1  | 2.47E+08 | 2.47E+08 | 6692    | 23.529411 |
| 15 | 42678271 | 42695967 | 17697   | 11.764706 | 5  | 61645975 | 61682922 | 36948   | 23.529411 |
| 16 | 10273981 | 10276571 | 2591    | 11.764706 | 5  | 69288477 | 69372317 | 83841   | 23.529411 |
| 16 | 28488776 | 28503629 | 14854   | 11.764706 | 5  | 71554990 | 72337850 | 782861  | 23.529411 |
| 16 | 57653630 | 57698265 | 44636   | 11.764706 | 6  | 31797880 | 31865577 | 67698   | 23.529411 |
| 16 | 89987339 | 89988654 | 1316    | 11.764706 | 6  | 32485851 | 32485872 | 22      | 23.529411 |
| 17 | 8791519  | 8794231  | 2713    | 11.764706 | 9  | 1.26E+08 | 1.27E+08 | 742981  | 23.529411 |
| 17 | 17740236 | 17927922 | 187687  | 11.764706 | 9  | 1.28E+08 | 1.28E+08 | 128     | 23.529411 |
| 17 | 34171478 | 34198604 | 27127   | 11.764706 | 10 | 75960468 | 76099253 | 138786  | 23.529411 |
| 17 | 56349278 | 56350271 | 994     | 11.764706 | 10 | 96540191 | 96580305 | 40115   | 23.529411 |
| 17 | 56357941 | 56358113 | 173     | 11.764706 | 11 | 77814989 | 77815111 | 123     | 23.529411 |
| 17 | 75369546 | 77086157 | 1716612 | 11.764706 | 12 | 32778695 | 32786500 | 7806    | 23.529411 |
| 17 | 77099247 | 78092622 | 993376  | 11.764706 | 15 | 23046598 | 23048496 | 1899    | 23.529411 |
| 19 | 50760516 | 50766570 | 6055    | 11.764706 | 15 | 50849380 | 50872974 | 23595   | 23.529411 |
| 19 | 50796566 | 50836689 | 40124   | 11.764706 | 16 | 46693906 | 46694461 | 556     | 23.529411 |
| 20 | 2384209  | 2411082  | 26874   | 11.764706 | 16 | 46712898 | 46713139 | 242     | 23.529411 |
| 20 | 23618518 | 23618656 | 139     | 11.764706 | 17 | 19729339 | 19741803 | 12465   | 23.529411 |
| 20 | 60718894 | 60718952 | 59      | 11.764706 | 17 | 29110052 | 29114424 | 4373    | 23.529411 |
| 20 | 61987803 | 62599159 | 611357  | 11.764706 | 17 | 30190276 | 30190437 | 162     | 23.529411 |
| 22 | 18901042 | 18907140 | 6099    | 11.764706 | 17 | 30226829 | 30228745 | 1917    | 23.529411 |
| 22 | 18918487 | 19929407 | 1010921 | 11.764706 | 17 | 30228745 | 30327458 | 98714   | 23.529411 |
| 22 | 24384300 | 24828385 | 444086  | 11.764706 | 17 | 44270188 | 44302802 | 32615   | 23.529411 |
| 22 | 37621845 | 37640194 | 18350   | 11.764706 | 22 | 32206711 | 32215105 | 8395    | 23.529411 |
| X  | 1.54E+08 | 1.54E+08 | 890923  | 11.764706 | 1  | 44173154 | 44201940 | 28787   | 17.647058 |
| Y  | 3713948  | 4114337  | 400390  | 11.764706 | 1  | 2.08E+08 | 2.08E+08 | 19860   | 17.647058 |
| Y  | 8158564  | 9072145  | 913582  | 11.764706 | 1  | 2.47E+08 | 2.47E+08 | 3431    | 17.647058 |
| Y  | 17493425 | 18149636 | 656212  | 11.764706 | 1  | 2.47E+08 | 2.47E+08 | 5171    | 17.647058 |
| Y  | 21882048 | 23799790 | 1917743 | 11.764706 | 2  | 32289292 | 32312627 | 23336   | 17.647058 |
|    |          |          |         |           | 2  | 32434737 | 32610141 | 175405  | 17.647058 |
|    |          |          |         |           | 2  | 61223914 | 61848845 | 624932  | 17.647058 |
|    |          |          |         |           | 5  | 61645765 | 61645975 | 211     | 17.647058 |
|    |          |          |         |           | 5  | 68711926 | 69288477 | 576552  | 17.647058 |
|    |          |          |         |           | 5  | 72337850 | 72660687 | 322838  | 17.647058 |
|    |          |          |         |           | 6  | 31777500 | 31783348 | 5849    | 17.647058 |
|    |          |          |         |           | 6  | 32485173 | 32485851 | 679     | 17.647058 |
|    |          |          |         |           | 6  | 32489935 | 32489967 | 33      | 17.647058 |
|    |          |          |         |           | 8  | 94777910 | 94793916 | 16007   | 17.647058 |
|    |          |          |         |           | 9  | 1.08E+08 | 1.08E+08 | 16132   | 17.647058 |
|    |          |          |         |           | 9  | 1.35E+08 | 1.35E+08 | 33833   | 17.647058 |
|    |          |          |         |           | 10 | 70432579 | 70441196 | 8618    | 17.647058 |
|    |          |          |         |           | 11 | 77814020 | 77814989 | 970     | 17.647058 |
|    |          |          |         |           | 11 | 85687650 | 85714505 | 26856   | 17.647058 |
|    |          |          |         |           | 12 | 32751551 | 32778695 | 27145   | 17.647058 |
|    |          |          |         |           | 12 | 32786500 | 32797205 | 10706   | 17.647058 |
|    |          |          |         |           | 12 | 1.12E+08 | 1.12E+08 | 2013    | 17.647058 |
|    |          |          |         |           | 14 | 50597479 | 50671026 | 73548   | 17.647058 |
|    |          |          |         |           | 14 | 73822253 | 73876874 | 54622   | 17.647058 |
|    |          |          |         |           | 15 | 23048496 | 23060821 | 12326   | 17.647058 |
|    |          |          |         |           | 15 | 41535920 | 41562793 | 26874   | 17.647058 |
|    |          |          |         |           | 15 | 44900781 | 44951263 | 50483   | 17.647058 |
|    |          |          |         |           | 15 | 50975081 | 50978890 | 3810    | 17.647058 |
|    |          |          |         |           | 15 | 50978890 | 51293272 | 314383  | 17.647058 |
|    |          |          |         |           | 15 | 63673002 | 65276001 | 1603000 | 17.647058 |
|    |          |          |         |           | 15 | 78732085 | 78770736 | 38652   | 17.647058 |
|    |          |          |         |           | 17 | 19728354 | 19729339 | 986     | 17.647058 |
|    |          |          |         |           | 17 | 29114424 | 29123314 | 8891    | 17.647058 |
|    |          |          |         |           | 17 | 44270027 | 44270188 | 162     | 17.647058 |
|    |          |          |         |           | 19 | 11200038 | 11230886 | 30849   | 17.647058 |

|    |          |          |         |           |
|----|----------|----------|---------|-----------|
| 1  | 10434465 | 10635417 | 200953  | 11.764706 |
| 1  | 1.74E+08 | 1.74E+08 | 30261   | 11.764706 |
| 1  | 2.08E+08 | 2.08E+08 | 2109    | 11.764706 |
| 1  | 2.27E+08 | 2.27E+08 | 251     | 11.764706 |
| 1  | 2.47E+08 | 2.47E+08 | 49107   | 11.764706 |
| 1  | 2.47E+08 | 2.47E+08 | 156     | 11.764706 |
| 2  | 9658018  | 9694645  | 36628   | 11.764706 |
| 2  | 32249023 | 32289292 | 40270   | 11.764706 |
| 2  | 60834239 | 61223914 | 389676  | 11.764706 |
| 2  | 61848845 | 64119802 | 2270958 | 11.764706 |
| 2  | 2.22E+08 | 2.22E+08 | 77      | 11.764706 |
| 3  | 1.56E+08 | 1.56E+08 | 11871   | 11.764706 |
| 4  | 1810306  | 3434075  | 1623770 | 11.764706 |
| 4  | 84193142 | 84205674 | 12533   | 11.764706 |
| 5  | 61682922 | 65272011 | 3589090 | 11.764706 |
| 5  | 72660687 | 72980685 | 319999  | 11.764706 |
| 5  | 78111435 | 78111897 | 463     | 11.764706 |
| 6  | 31625102 | 31777500 | 152399  | 11.764706 |
| 6  | 32412763 | 32485173 | 72411   | 11.764706 |
| 6  | 43112641 | 43738977 | 626337  | 11.764706 |
| 6  | 43738977 | 43739768 | 792     | 11.764706 |
| 6  | 88187257 | 88224182 | 36926   | 11.764706 |
| 6  | 88265277 | 88279303 | 14027   | 11.764706 |
| 7  | 1.57E+08 | 1.57E+08 | 487530  | 11.764706 |
| 8  | 94767910 | 94777910 | 10001   | 11.764706 |
| 8  | 94793916 | 94831517 | 37602   | 11.764706 |
| 9  | 39140211 | 41979303 | 2839093 | 11.764706 |
| 9  | 1.28E+08 | 1.28E+08 | 566     | 11.764706 |
| 9  | 1.35E+08 | 1.35E+08 | 9420    | 11.764706 |
| 9  | 1.35E+08 | 1.35E+08 | 1538    | 11.764706 |
| 10 | 89653839 | 89717626 | 63788   | 11.764706 |
| 10 | 94215352 | 94415113 | 199762  | 11.764706 |
| 11 | 63486224 | 63523594 | 37371   | 11.764706 |
| 11 | 77812193 | 77814020 | 1828    | 11.764706 |
| 11 | 85687540 | 85687650 | 111     | 11.764706 |
| 12 | 32751385 | 32751551 | 167     | 11.764706 |
| 12 | 32797205 | 34591668 | 1794464 | 11.764706 |
| 14 | 20942890 | 20943222 | 333     | 11.764706 |
| 14 | 50596637 | 50597479 | 843     | 11.764706 |
| 14 | 50671026 | 50671179 | 154     | 11.764706 |
| 14 | 50671179 | 50768742 | 97564   | 11.764706 |
| 14 | 73789851 | 73822253 | 32403   | 11.764706 |
| 14 | 73876874 | 74425061 | 548188  | 11.764706 |
| 14 | 1.03E+08 | 1.03E+08 | 45679   | 11.764706 |
| 15 | 41562793 | 41961373 | 398581  | 11.764706 |
| 15 | 44898259 | 44900781 | 2523    | 11.764706 |
| 15 | 44951263 | 44952618 | 1356    | 11.764706 |
| 15 | 63579635 | 63673002 | 93368   | 11.764706 |
| 15 | 65276001 | 65281708 | 5708    | 11.764706 |
| 15 | 78770736 | 78834731 | 63996   | 11.764706 |
| 15 | 93487545 | 93487634 | 90      | 11.764706 |
| 15 | 93489253 | 93496573 | 7321    | 11.764706 |
| 16 | 46713139 | 46715275 | 2137    | 11.764706 |
| 16 | 70551635 | 70553577 | 1943    | 11.764706 |
| 17 | 15880430 | 17218532 | 1338103 | 11.764706 |
| 17 | 19720206 | 19728354 | 8149    | 11.764706 |
| 17 | 29123314 | 29123434 | 121     | 11.764706 |
| 17 | 29663929 | 29669971 | 6043    | 11.764706 |
| 17 | 29704134 | 30190276 | 486143  | 11.764706 |
| 17 | 44248362 | 44269718 | 21357   | 11.764706 |
| 17 | 44269718 | 44270027 | 310     | 11.764706 |
| 17 | 44302802 | 44788332 | 485531  | 11.764706 |
| 17 | 61560736 | 61560846 | 111     | 11.764706 |
| 18 | 9134199  | 9134357  | 159     | 11.764706 |
| 19 | 11230886 | 11230989 | 104     | 11.764706 |
| 20 | 8770749  | 8770961  | 213     | 11.764706 |
| 20 | 31706596 | 33834793 | 2128198 | 11.764706 |
| 21 | 44496313 | 44496400 | 88      | 11.764706 |
| 22 | 40758971 | 42373034 | 1614064 | 11.764706 |
| 22 | 42373034 | 42373066 | 33      | 11.764706 |
| X  | 40460110 | 41599792 | 1139683 | 11.764706 |



Supplementary Table 6. Chromosomal regions with gains and losses present in > 10% of SALS2 patients.

| Duplications |          |          |                       |               | Deletions  |          |          |                       |               |
|--------------|----------|----------|-----------------------|---------------|------------|----------|----------|-----------------------|---------------|
| Chromosome   | Start    | Stop     | Aberration Size (bps) | Frequency (%) | Chromosome | Start    | Stop     | Aberration Size (bps) | Frequency (%) |
| 14           | 31552632 | 31552690 | 59                    | 76.92308      | 3          | 1.56E+08 | 1.56E+08 | 12674                 | 69.23077      |
| 17           | 17716576 | 17720711 | 4136                  | 69.23077      | 20         | 33986975 | 35575306 | 1588332               | 69.23077      |
| 22           | 24376158 | 24384300 | 8143                  | 69.23077      | 1          | 47767175 | 47770585 | 3411                  | 61.53846      |
| 17           | 17720711 | 17726812 | 6102                  | 61.53846      | 18         | 9117815  | 9134199  | 16385                 | 61.53846      |
| 9            | 1.29E+08 | 1.29E+08 | 186207                | 53.846153     | 3          | 1.56E+08 | 1.56E+08 | 103                   | 53.846153     |
| 9            | 1.31E+08 | 1.31E+08 | 6600                  | 53.846153     | 12         | 1.12E+08 | 1.12E+08 | 37511                 | 53.846153     |
| 17           | 17715816 | 17716576 | 761                   | 53.846153     | 1          | 47435653 | 47767175 | 331523                | 46.153847     |
| 1            | 55331123 | 55527185 | 196063                | 46.153847     | 1          | 47770585 | 47770755 | 171                   | 46.153847     |
| 2            | 1.28E+08 | 1.28E+08 | 631173                | 46.153847     | 2          | 32314495 | 32409410 | 94916                 | 46.153847     |
| 2            | 2.42E+08 | 2.42E+08 | 71409                 | 46.153847     | 10         | 70432579 | 70441196 | 8618                  | 46.153847     |
| 5            | 1.77E+08 | 1.77E+08 | 15676                 | 46.153847     | 14         | 92527804 | 92562372 | 34569                 | 46.153847     |
| 17           | 17726812 | 17726864 | 53                    | 46.153847     | 16         | 46695793 | 46703042 | 7250                  | 46.153847     |
| 19           | 50766570 | 50795529 | 28960                 | 46.153847     | 17         | 2541457  | 2569504  | 28048                 | 46.153847     |
| 20           | 23614298 | 23618518 | 4221                  | 46.153847     | 18         | 9117738  | 9117815  | 78                    | 46.153847     |
| 20           | 62037795 | 62599159 | 561365                | 46.153847     | 1          | 46685884 | 47435653 | 749770                | 38.46154      |
| X            | 1.22E+08 | 1.22E+08 | 2083                  | 46.153847     | 2          | 32312627 | 32314495 | 1869                  | 38.46154      |
| 1            | 2337815  | 6557050  | 4219236               | 38.46154      | 2          | 32409410 | 32434737 | 25328                 | 38.46154      |
| 1            | 2.08E+08 | 2.08E+08 | 55564                 | 38.46154      | 3          | 1.56E+08 | 1.56E+08 | 101                   | 38.46154      |
| 2            | 1.28E+08 | 1.28E+08 | 1900                  | 38.46154      | 5          | 69372317 | 70247951 | 875635                | 38.46154      |
| 9            | 1.29E+08 | 1.29E+08 | 80299                 | 38.46154      | 6          | 74303319 | 74351597 | 48279                 | 38.46154      |
| 10           | 99504592 | 99519055 | 14464                 | 38.46154      | 9          | 1.28E+08 | 1.28E+08 | 122795                | 38.46154      |
| 11           | 17408294 | 17450206 | 41913                 | 38.46154      | 10         | 1.21E+08 | 1.21E+08 | 111867                | 38.46154      |
| 14           | 1.05E+08 | 1.05E+08 | 21095                 | 38.46154      | 12         | 1.12E+08 | 1.12E+08 | 38                    | 38.46154      |
| 15           | 89346786 | 90198653 | 851868                | 38.46154      | 14         | 92413787 | 92527804 | 114018                | 38.46154      |
| 16           | 28488776 | 28502793 | 14018                 | 38.46154      | 15         | 44912321 | 44951263 | 38943                 | 38.46154      |
| 19           | 50364748 | 50766570 | 401823                | 38.46154      | 15         | 50911927 | 50955264 | 43338                 | 38.46154      |
| 19           | 50795529 | 50796566 | 1038                  | 38.46154      | 16         | 46694461 | 46695793 | 1333                  | 38.46154      |
| 20           | 23618518 | 23618656 | 139                   | 38.46154      | 16         | 46703042 | 46713139 | 10098                 | 38.46154      |
| 20           | 61992392 | 62037795 | 45404                 | 38.46154      | 17         | 2541347  | 2541457  | 111                   | 38.46154      |
| X            | 1.22E+08 | 1.22E+08 | 16487                 | 38.46154      | 17         | 2569504  | 2580007  | 10504                 | 38.46154      |
| X            | 1.53E+08 | 1.54E+08 | 475280                | 38.46154      | 18         | 9134199  | 9134357  | 159                   | 38.46154      |
| 1            | 16348551 | 22216964 | 5868414               | 30.76923      | 22         | 32154613 | 32206586 | 51974                 | 38.46154      |
| 1            | 1.65E+08 | 1.65E+08 | 202242                | 30.76923      | 1          | 47770755 | 47776133 | 5379                  | 30.76923      |
| 1            | 2.05E+08 | 2.05E+08 | 29273                 | 30.76923      | 1          | 2.08E+08 | 2.08E+08 | 21968                 | 30.76923      |
| 1            | 2.08E+08 | 2.08E+08 | 647                   | 30.76923      | 2          | 64143925 | 64199380 | 55456                 | 30.76923      |
| 1            | 2.08E+08 | 2.08E+08 | 280                   | 30.76923      | 3          | 1.56E+08 | 1.56E+08 | 2765                  | 30.76923      |
| 1            | 2.27E+08 | 2.27E+08 | 97122                 | 30.76923      | 6          | 32412763 | 32485173 | 72411                 | 30.76923      |
| 5            | 37834861 | 37834984 | 124                   | 30.76923      | 6          | 32485173 | 32489935 | 4763                  | 30.76923      |
| 6            | 31919858 | 32148778 | 228921                | 30.76923      | 6          | 73497268 | 74303319 | 806052                | 30.76923      |
| 7            | 2281791  | 4830775  | 2548985               | 30.76923      | 6          | 74351597 | 74354308 | 2712                  | 30.76923      |
| 7            | 1E+08    | 1E+08    | 134                   | 30.76923      | 9          | 1.35E+08 | 1.35E+08 | 41086                 | 30.76923      |
| 9            | 87283500 | 87285883 | 2384                  | 30.76923      | 12         | 1.12E+08 | 1.12E+08 | 156                   | 30.76923      |
| 9            | 1.29E+08 | 1.29E+08 | 77                    | 30.76923      | 15         | 21200700 | 23044610 | 1843911               | 30.76923      |
| 9            | 1.31E+08 | 1.31E+08 | 622                   | 30.76923      | 15         | 44900781 | 44912321 | 11541                 | 30.76923      |
| 11           | 17450206 | 17464859 | 14654                 | 30.76923      | 15         | 44951263 | 44952618 | 1356                  | 30.76923      |
| 16           | 28502793 | 28503629 | 837                   | 30.76923      | 15         | 50955264 | 50975081 | 19818                 | 30.76923      |
| 17           | 17726864 | 17740072 | 13209                 | 30.76923      | 17         | 2580007  | 4605227  | 2025221               | 30.76923      |
| 17           | 56350271 | 56357941 | 7671                  | 30.76923      | 22         | 32206586 | 32206711 | 126                   | 30.76923      |
| 19           | 50364607 | 50364748 | 142                   | 30.76923      | 1          | 63836485 | 63903304 | 66820                 | 23.076923     |
| 19           | 50796566 | 50836689 | 40124                 | 30.76923      | 1          | 1.74E+08 | 1.74E+08 | 29292                 | 23.076923     |
| Y            | 4114337  | 8158564  | 4044228               | 30.76923      | 1          | 1.86E+08 | 1.86E+08 | 14397                 | 23.076923     |
| 1            | 22216964 | 22222489 | 5526                  | 23.076923     | 1          | 2.08E+08 | 2.08E+08 | 1585                  | 23.076923     |
| 1            | 1.56E+08 | 1.57E+08 | 790848                | 23.076923     | 1          | 2.08E+08 | 2.08E+08 | 381214                | 23.076923     |
| 1            | 1.65E+08 | 1.65E+08 | 1388                  | 23.076923     | 2          | 39249998 | 39286024 | 36027                 | 23.076923     |
| 1            | 2.05E+08 | 2.05E+08 | 179                   | 23.076923     | 2          | 64119802 | 64143925 | 24124                 | 23.076923     |
| 1            | 2.08E+08 | 2.08E+08 | 18483                 | 23.076923     | 2          | 2.22E+08 | 2.22E+08 | 77                    | 23.076923     |
| 1            | 2.27E+08 | 2.27E+08 | 17578                 | 23.076923     | 6          | 32412626 | 32412763 | 138                   | 23.076923     |
| 2            | 20818975 | 20850933 | 31959                 | 23.076923     | 6          | 74354308 | 74530628 | 176321                | 23.076923     |
| 2            | 1.28E+08 | 1.28E+08 | 239                   | 23.076923     | 8          | 38092084 | 38099800 | 7717                  | 23.076923     |
| 2            | 2.42E+08 | 2.42E+08 | 936                   | 23.076923     | 9          | 1.08E+08 | 1.08E+08 | 289                   | 23.076923     |
| 4            | 1.02E+08 | 1.03E+08 | 1154706               | 23.076923     | 9          | 1.35E+08 | 1.35E+08 | 2167                  | 23.076923     |
| 5            | 1.38E+08 | 1.38E+08 | 4209                  | 23.076923     | 9          | 1.35E+08 | 1.35E+08 | 1452                  | 23.076923     |
| 5            | 1.68E+08 | 1.69E+08 | 386913                | 23.076923     | 10         | 76154068 | 76768859 | 614792                | 23.076923     |
| 6            | 29910241 | 29910772 | 532                   | 23.076923     | 10         | 94373202 | 94405187 | 31986                 | 23.076923     |
| 6            | 32148778 | 32149461 | 684                   | 23.076923     | 12         | 1.12E+08 | 1.12E+08 | 31488                 | 23.076923     |
| 6            | 32166526 | 32191834 | 25309                 | 23.076923     | 15         | 20575646 | 21200700 | 625055                | 23.076923     |
| 6            | 32485173 | 32489935 | 4763                  | 23.076923     | 15         | 44892847 | 44900781 | 7935                  | 23.076923     |
| 7            | 1E+08    | 1E+08    | 5687                  | 23.076923     | 15         | 50849380 | 50911927 | 62548                 | 23.076923     |
| 8            | 1.45E+08 | 1.45E+08 | 413943                | 23.076923     | 16         | 46693906 | 46694461 | 556                   | 23.076923     |
| 9            | 1.31E+08 | 1.31E+08 | 252                   | 23.076923     | 17         | 19752773 | 19769218 | 16446                 | 23.076923     |

|    |          |          |         |           |    |          |          |         |           |
|----|----------|----------|---------|-----------|----|----------|----------|---------|-----------|
| 9  | 1.36E+08 | 1.4E+08  | 3671630 | 23.076923 | 17 | 29110052 | 29124350 | 14299   | 23.076923 |
| 11 | 424565   | 7324653  | 6900089 | 23.076923 | 17 | 29663929 | 29667773 | 3845    | 23.076923 |
| 11 | 17464859 | 17470241 | 5383    | 23.076923 | 17 | 30212981 | 30228745 | 15765   | 23.076923 |
| 11 | 45906997 | 45925785 | 18789   | 23.076923 | 17 | 30228745 | 30326197 | 97453   | 23.076923 |
| 12 | 57587270 | 57605854 | 18585   | 23.076923 | 17 | 34151035 | 34169542 | 18508   | 23.076923 |
| 12 | 1.25E+08 | 1.25E+08 | 291     | 23.076923 | 17 | 61560736 | 61560846 | 111     | 23.076923 |
| 14 | 99641841 | 1E+08    | 551735  | 23.076923 | 20 | 43059979 | 44350752 | 1290774 | 23.076923 |
| 15 | 42678271 | 42703427 | 25157   | 23.076923 | 1  | 44173154 | 44201940 | 28787   | 15.384615 |
| 15 | 50978890 | 51201129 | 222240  | 23.076923 | 1  | 63836432 | 63836485 | 54      | 15.384615 |
| 16 | 1250785  | 2147716  | 896932  | 23.076923 | 1  | 1.74E+08 | 1.74E+08 | 1427    | 15.384615 |
| 16 | 57685031 | 57698265 | 13235   | 23.076923 | 1  | 1.74E+08 | 1.79E+08 | 5492971 | 15.384615 |
| 17 | 75277604 | 78092622 | 2815019 | 23.076923 | 1  | 1.86E+08 | 1.86E+08 | 3400    | 15.384615 |
| 19 | 50836689 | 50885869 | 49181   | 23.076923 | 1  | 1.86E+08 | 1.86E+08 | 58      | 15.384615 |
| 20 | 1963661  | 2411082  | 447422  | 23.076923 | 1  | 2.06E+08 | 2.06E+08 | 5691    | 15.384615 |
| 21 | 43693384 | 44496400 | 803017  | 23.076923 | 1  | 2.08E+08 | 2.08E+08 | 224     | 15.384615 |
| 21 | 44496400 | 46931240 | 2434841 | 23.076923 | 1  | 2.08E+08 | 2.08E+08 | 1314    | 15.384615 |
| 22 | 37622611 | 37640194 | 17584   | 23.076923 | 1  | 2.47E+08 | 2.47E+08 | 64537   | 15.384615 |
| X  | 1.22E+08 | 1.22E+08 | 123377  | 23.076923 | 2  | 32434737 | 32610141 | 175405  | 15.384615 |
| Y  | 8158564  | 8694578  | 536015  | 23.076923 | 2  | 39240556 | 39249998 | 9443    | 15.384615 |
| Y  | 17890214 | 22086267 | 4196054 | 23.076923 | 2  | 39286024 | 39294940 | 8917    | 15.384615 |
| 1  | 1950820  | 1950907  | 88      | 15.384615 | 3  | 1.56E+08 | 1.57E+08 | 1100126 | 15.384615 |
| 1  | 1950907  | 2337815  | 386909  | 15.384615 | 4  | 1810306  | 3434075  | 1623770 | 15.384615 |
| 1  | 15834248 | 16348551 | 514304  | 15.384615 | 4  | 84193142 | 84200133 | 6992    | 15.384615 |
| 1  | 22222489 | 22379326 | 156838  | 15.384615 | 6  | 32489935 | 32489967 | 33      | 15.384615 |
| 1  | 55527185 | 55529886 | 2702    | 15.384615 | 6  | 74530628 | 76884915 | 2354288 | 15.384615 |
| 1  | 65854982 | 65855380 | 399     | 15.384615 | 7  | 22771002 | 23018107 | 247106  | 15.384615 |
| 1  | 1.1E+08  | 1.1E+08  | 186810  | 15.384615 | 8  | 38090450 | 38092084 | 1635    | 15.384615 |
| 1  | 1.65E+08 | 1.65E+08 | 213     | 15.384615 | 8  | 38099800 | 38899455 | 799656  | 15.384615 |
| 1  | 1.65E+08 | 1.65E+08 | 27410   | 15.384615 | 8  | 94767910 | 94830376 | 62467   | 15.384615 |
| 1  | 2.08E+08 | 2.08E+08 | 141121  | 15.384615 | 9  | 1.08E+08 | 1.08E+08 | 15844   | 15.384615 |
| 1  | 2.27E+08 | 2.27E+08 | 462663  | 15.384615 | 9  | 1.31E+08 | 1.31E+08 | 14542   | 15.384615 |
| 2  | 20818280 | 20818975 | 696     | 15.384615 | 9  | 1.35E+08 | 1.35E+08 | 87      | 15.384615 |
| 2  | 74589902 | 74590293 | 392     | 15.384615 | 10 | 75960468 | 76154068 | 193601  | 15.384615 |
| 2  | 1.53E+08 | 1.53E+08 | 335     | 15.384615 | 10 | 94369290 | 94373202 | 3913    | 15.384615 |
| 2  | 1.72E+08 | 1.72E+08 | 14175   | 15.384615 | 10 | 94405187 | 94409813 | 4627    | 15.384615 |
| 2  | 2.42E+08 | 2.42E+08 | 8449    | 15.384615 | 10 | 1.02E+08 | 1.02E+08 | 4014    | 15.384615 |
| 3  | 1.28E+08 | 1.28E+08 | 9415    | 15.384615 | 11 | 77812064 | 77815111 | 3048    | 15.384615 |
| 4  | 473916   | 1810305  | 1336390 | 15.384615 | 11 | 85714533 | 85737381 | 22849   | 15.384615 |
| 4  | 3434076  | 9785385  | 6351310 | 15.384615 | 11 | 1.08E+08 | 1.08E+08 | 51012   | 15.384615 |
| 4  | 41216529 | 41259802 | 43274   | 15.384615 | 12 | 32751385 | 32786500 | 35116   | 15.384615 |
| 4  | 41700207 | 41748255 | 48049   | 15.384615 | 12 | 49692322 | 51495933 | 1803612 | 15.384615 |
| 4  | 1.02E+08 | 1.02E+08 | 168033  | 15.384615 | 12 | 64178732 | 64895282 | 716551  | 15.384615 |
| 4  | 1.85E+08 | 1.85E+08 | 275     | 15.384615 | 14 | 50597479 | 50666488 | 69010   | 15.384615 |
| 5  | 37824072 | 37834861 | 10790   | 15.384615 | 14 | 1.04E+08 | 1.04E+08 | 267919  | 15.384615 |
| 5  | 37834984 | 37835437 | 454     | 15.384615 | 15 | 20190548 | 20575646 | 385099  | 15.384615 |
| 5  | 70307077 | 70309855 | 2779    | 15.384615 | 15 | 23044610 | 23052587 | 7978    | 15.384615 |
| 5  | 1.21E+08 | 1.22E+08 | 235225  | 15.384615 | 15 | 41535920 | 41961373 | 425454  | 15.384615 |
| 5  | 1.38E+08 | 1.38E+08 | 2289    | 15.384615 | 15 | 50975081 | 50978890 | 3810    | 15.384615 |
| 5  | 1.38E+08 | 1.38E+08 | 399     | 15.384615 | 15 | 50978890 | 51285562 | 306673  | 15.384615 |
| 5  | 1.68E+08 | 1.68E+08 | 514463  | 15.384615 | 15 | 64226370 | 65275796 | 1049427 | 15.384615 |
| 5  | 1.69E+08 | 1.77E+08 | 7939684 | 15.384615 | 15 | 78732085 | 78893680 | 161596  | 15.384615 |
| 6  | 29910772 | 29911268 | 497     | 15.384615 | 16 | 46713139 | 46715275 | 2137    | 15.384615 |
| 6  | 32149461 | 32166526 | 17066   | 15.384615 | 17 | 19729339 | 19752773 | 23435   | 15.384615 |
| 6  | 32191834 | 32191906 | 73      | 15.384615 | 17 | 29663223 | 29663929 | 707     | 15.384615 |
| 6  | 32489935 | 32489967 | 33      | 15.384615 | 17 | 30190276 | 30212981 | 22706   | 15.384615 |
| 7  | 4830775  | 4832078  | 1304    | 15.384615 | 17 | 30326197 | 30327458 | 1262    | 15.384615 |
| 8  | 42037953 | 42065260 | 27308   | 15.384615 | 17 | 34144751 | 34151035 | 6285    | 15.384615 |
| 8  | 1.45E+08 | 1.45E+08 | 1358    | 15.384615 | 17 | 34169542 | 34171318 | 1777    | 15.384615 |
| 9  | 35068399 | 35072760 | 4362    | 15.384615 | 17 | 44302758 | 44302802 | 45      | 15.384615 |
| 9  | 87283404 | 87283500 | 97      | 15.384615 | 19 | 37207281 | 38919986 | 1712706 | 15.384615 |
| 9  | 1.16E+08 | 1.16E+08 | 12322   | 15.384615 | 20 | 33834793 | 33986975 | 152183  | 15.384615 |
| 9  | 1.36E+08 | 1.36E+08 | 580363  | 15.384615 | 20 | 44350752 | 44732891 | 382140  | 15.384615 |
| 10 | 94333786 | 94353243 | 19458   | 15.384615 | 22 | 40758929 | 42373034 | 1614106 | 15.384615 |
| 11 | 45832404 | 45906997 | 74594   | 15.384615 | 22 | 42373034 | 42373060 | 27      | 15.384615 |
| 11 | 45925785 | 46750928 | 825144  | 15.384615 | X  | 1.2E+08  | 1.2E+08  | 5016    | 15.384615 |
| 12 | 57549817 | 57587270 | 37454   | 15.384615 |    |          |          |         |           |
| 12 | 57605854 | 57606775 | 922     | 15.384615 |    |          |          |         |           |
| 12 | 1.25E+08 | 1.25E+08 | 42      | 15.384615 |    |          |          |         |           |
| 13 | 51483764 | 51484234 | 471     | 15.384615 |    |          |          |         |           |
| 13 | 99064338 | 99099142 | 34805   | 15.384615 |    |          |          |         |           |
| 14 | 98514914 | 99641841 | 1126928 | 15.384615 |    |          |          |         |           |
| 15 | 27017550 | 27018935 | 1386    | 15.384615 |    |          |          |         |           |
| 15 | 42703427 | 42703603 | 177     | 15.384615 |    |          |          |         |           |
| 16 | 931290   | 1250785  | 319496  | 15.384615 |    |          |          |         |           |
| 16 | 2147716  | 6069877  | 3922162 | 15.384615 |    |          |          |         |           |

|    |          |          |         |           |
|----|----------|----------|---------|-----------|
| 16 | 7680488  | 7743336  | 62849   | 15.384615 |
| 16 | 10273832 | 10276571 | 2740    | 15.384615 |
| 16 | 57653630 | 57685031 | 31402   | 15.384615 |
| 16 | 57698265 | 57698622 | 358     | 15.384615 |
| 16 | 70323409 | 70517903 | 194495  | 15.384615 |
| 16 | 72093075 | 74808756 | 2715682 | 15.384615 |
| 17 | 1648197  | 1658560  | 10364   | 15.384615 |
| 17 | 8785037  | 8808289  | 23253   | 15.384615 |
| 17 | 17715423 | 17715816 | 394     | 15.384615 |
| 17 | 17740072 | 17740236 | 165     | 15.384615 |
| 17 | 26083763 | 27076535 | 992773  | 15.384615 |
| 18 | 77439765 | 77496404 | 56640   | 15.384615 |
| 19 | 1000387  | 1549191  | 548805  | 15.384615 |
| 20 | 1963574  | 1963661  | 88      | 15.384615 |
| 20 | 2411082  | 2636794  | 225713  | 15.384615 |
| 20 | 3869789  | 3870616  | 828     | 15.384615 |
| 20 | 60718894 | 61992392 | 1273499 | 15.384615 |
| 21 | 46931240 | 46933629 | 2390    | 15.384615 |
| 22 | 24384300 | 24828385 | 444086  | 15.384615 |
| 22 | 37621845 | 37622611 | 767     | 15.384615 |
| 22 | 37640194 | 38577837 | 937644  | 15.384615 |
| 22 | 42486755 | 42526821 | 40067   | 15.384615 |
| X  | 47433998 | 53349964 | 5915967 | 15.384615 |
| X  | 62875495 | 63005325 | 129831  | 15.384615 |
| X  | 1.22E+08 | 1.22E+08 | 88      | 15.384615 |
| Y  | 8694578  | 9072145  | 377568  | 15.384615 |
| Y  | 14389646 | 17890214 | 3500569 | 15.384615 |
| Y  | 22086267 | 24874322 | 2788056 | 15.384615 |

---

Supplementary Table 7. List of genes located in the most recurrent CNVs of SALS patients (penetrance &gt; 10%).

| Duplications   |                                                          |            |                 |               |           | Deletions |                                                                                      |            |                 |               |           |
|----------------|----------------------------------------------------------|------------|-----------------|---------------|-----------|-----------|--------------------------------------------------------------------------------------|------------|-----------------|---------------|-----------|
| Gene name      | Gene description                                         | Chromosome | Gene start (bp) | Gene end (bp) | Size (bp) | Gene name | Gene description                                                                     | Chromosome | Gene start (bp) | Gene end (bp) | Size (bp) |
| ABCA2          | ATP binding cassette subfamily A member 2                | 9          | 139901686       | 139923367     | 21682     | ACE       | angiotensin I converting enzyme                                                      | 17         | 61554422        | 61599205      | 44784     |
| ABCC8          | ATP binding cassette subfamily C member 8                | 11         | 17414432        | 17498449      | 84018     | ADAM17    | ADAM metalloproteinase domain 17                                                     | 2          | 9628615         | 9695921       | 67307     |
| ABCG1          | ATP binding cassette subfamily G member 1                | 21         | 43619799        | 43717354      | 97556     | ADK       | adenosine kinase                                                                     | 10         | 75910960        | 76469061      | 558102    |
| ABHD2          | abhydrolase domain containing 2                          | 15         | 89630690        | 89745591      | 114902    | ADSL      | adenylosuccinate lyase                                                               | 22         | 40742507        | 40786467      | 43961     |
| ACAN           | aggrecan                                                 | 15         | 89346674        | 89418585      | 71912     | ALG6      | ALG6, alpha-1,3-glucosyltransferase                                                  | 1          | 63833261        | 63904233      | 70973     |
| ACHE           | acetylcholinesterase (Cartwright blood group)            | 7          | 100487615       | 100494594     | 6980      | AP4E1     | adaptor related protein complex 4 epsilon 1 subunit                                  | 15         | 51200869        | 51298097      | 97229     |
| ADARB1         | adenosine deaminase, RNA specific B1                     | 21         | 46493768        | 46646478      | 152711    | APH1B     | aph-1 homolog B, gamma-secretase subunit                                             | 15         | 63568217        | 63601325      | 33109     |
| ADGRG1         | adhesion G protein-coupled receptor G1                   | 16         | 57653442        | 57698944      | 45503     | APOM      | apolipoprotein M                                                                     | 6          | 31620193        | 31625987      | 5795      |
| AGER           | advanced glycosylation end-product specific receptor     | 6          | 32148745        | 32152101      | 3357      | ATM       | ATM serine/threonine kinase                                                          | 11         | 108093211       | 108239829     | 146619    |
| AKAP4          | A-kinase anchoring protein 4                             | X          | 49955406        | 49965664      | 10259     | ATP6AP2   | ATPase H+ transporting accessory protein 2                                           | X          | 40440146        | 40465889      | 25744     |
| AKT1           | AKT serine/threonine kinase 1                            | 14         | 105235686       | 105262088     | 26403     | ATXN2     | ataxin 2                                                                             | 12         | 111890018       | 112037480     | 147463    |
| ALDH4A1        | aldehyde dehydrogenase 4 family member A1                | 1          | 19197926        | 19229275      | 31350     | ATXN3     | ataxin 3                                                                             | 14         | 92524896        | 92572965      | 48070     |
| ALPL           | alkaline phosphatase, liver/bone/kidney                  | 1          | 21835858        | 21904905      | 69048     | B3GNT2    | UDP-GlcNAc:betaGal beta-1,3-N-acetylglucosaminyltransferase 2                        | 2          | 62423248        | 62451866      | 28619     |
| ANO9           | anoctamin 9                                              | 11         | 417933          | 442011        | 24079     | BDP1      | B double prime 1, subunit of RNA polymerase III transcription initiation factor IIIB | 5          | 70751442        | 70863649      | 112208    |
| AP2A2          | adaptor related protein complex 2 alpha 2 subunit        | 11         | 924894          | 1012239       | 87346     | BIRC6     | baculoviral IAP repeat containing 6                                                  | 2          | 32582096        | 32843966      | 261871    |
| AP4E1          | adaptor related protein complex 4 epsilon 1 subunit      | 15         | 51200869        | 51298097      | 97229     | CA12      | carbonic anhydrase 12                                                                | 15         | 63613577        | 63674360      | 60784     |
| AP4S1          | adaptor related protein complex 4 sigma 1 subunit        | 14         | 31494312        | 31562818      | 68507     | CASK      | calcium/calmodulin dependent serine protein kinase                                   | X          | 41374187        | 41782716      | 408530    |
| AP5Z1          | adaptor related protein complex 5 zeta 1 subunit         | 7          | 4815253         | 4833943       | 18691     | CBS       | cystathionine-beta-synthase                                                          | 21         | 44473301        | 44497053      | 23753     |
| APBB1          | amyloid beta precursor protein binding family B member 1 | 11         | 6416355         | 6440644       | 24290     | CCT4      | chaperonin containing TCP1 subunit 4                                                 | 2          | 62095224        | 62115939      | 20716     |
| APBB2          | amyloid beta precursor protein binding family B member 2 | 4          | 40812044        | 41218731      | 406688    | CD109     | CD109 molecule                                                                       | 6          | 74405508        | 74538040      | 132533    |
| ARHGEP9        | Cdc42 guanine nucleotide exchange factor 9               | X          | 62854847        | 63005426      | 150580    | CHD2      | chromodomain helicase DNA binding protein 2                                          | 15         | 93426526        | 93571237      | 144712    |
| ATP13A2        | ATPase 13A2                                              | 1          | 17312453        | 17338423      | 25971     | CHP1      | calcineurin like EF-hand protein 1                                                   | 15         | 41523037        | 41574043      | 51007     |
| BANK1          | B-cell scaffold protein with ankyrin repeats 1           | 4          | 102332443       | 102995969     | 663527    | CNTNAP3   | contactin associated protein-like 3                                                  | 9          | 39072764        | 39288312      | 215549    |
| <b>BCL11B</b>  | B-cell CLL/lymphoma 11B                                  | 14         | 99635624        | 99737861      | 102238    | COG4      | component of oligomeric golgi complex 4                                              | 16         | 70514471        | 70557468      | 42998     |
| BIN1           | bridging integrator 1                                    | 2          | 127805603       | 127864931     | 59329     | COQ2      | coenzyme Q2, polyprenyltransferase complement C3b/C4b receptor 1 (Knops blood group) | 4          | 84182689        | 84206067      | 23379     |
| BRD3           | bromodomain containing 3                                 | 9          | 136895427       | 136933657     | 38231     | CR1       | receptor 1 (Knops blood group)                                                       | 1          | 207669492       | 207813992     | 144501    |
| C1QTNF1        | C1q and TNF related 1                                    | 17         | 77018896        | 77045870      | 26975     | CRLF3     | cytokine receptor like factor 3                                                      | 17         | 29096406        | 29151794      | 55389     |
| C1QTNF1-AS1    | C1QTNF1 antisense RNA 1                                  | 17         | 77015291        | 77023737      | 8447      | CSNK1G1   | casein kinase 1 gamma 1                                                              | 15         | 64457716        | 64648442      | 190727    |
| C4A            | complement C4A (Rodgers blood group)                     | 6          | 31949801        | 31970458      | 20658     | CUL4B     | cullin 4B                                                                            | X          | 119658464       | 119709649     | 51186     |
| CABIN1         | calcineurin binding protein 1                            | 22         | 24407642        | 24574596      | 166955    | CYP2C19   | cytochrome P450 family 2 subfamily C member 19                                       | 10         | 96447911        | 96613017      | 165107    |
| <b>CACNA1H</b> | calcium voltage-gated channel subunit alpha1 H           | 16         | 1203241         | 1271771       | 68531     | DAPK2     | death associated protein kinase 2                                                    | 15         | 64199235        | 64364232      | 164998    |
| CACNB4         | calcium voltage-gated channel auxiliary subunit beta 4   | 2          | 152689290       | 152955593     | 266304    | DARS2     | aspartyl-tRNA synthetase 2, mitochondrial                                            | 1          | 173793641       | 173827684     | 34044     |
| CAMSAP1        | calmodulin regulated spectrin associated protein 1       | 9          | 138700333       | 138799074     | 98742     | DDHD2     | DDHD domain containing 2                                                             | 8          | 38082736        | 38133076      | 50341     |
| CAPN3          | calpain 3                                                | 15         | 42640301        | 42704516      | 64216     | DDX3X     | DEAD-box helicase 3, X-linked                                                        | X          | 41192651        | 41223725      | 31075     |
| CARD11         | caspase recruitment domain family member 11              | 7          | 2945775         | 3083579       | 137805    | DENND1A   | DENN domain containing 1A                                                            | 9          | 126141933       | 126692431     | 550499    |

|               |                                                                                      |    |           |           |        |              |                                                                              |    |           |           |        |
|---------------|--------------------------------------------------------------------------------------|----|-----------|-----------|--------|--------------|------------------------------------------------------------------------------|----|-----------|-----------|--------|
| CBS           | cystathionine-beta-synthase                                                          | 21 | 44473301  | 44497053  | 23753  | DEPDC5       | DEP domain containing 5                                                      | 22 | 32149944  | 32303012  | 153069 |
| CCDC120       | coiled-coil domain containing 120                                                    | X  | 48911101  | 48927509  | 16409  | DLGAP4       | DLG associated protein 4                                                     | 20 | 34894258  | 35157040  | 262783 |
| CCKBR         | cholecystokinin B receptor                                                           | 11 | 6280966   | 6293357   | 12392  | DNAJB6       | DnaJ heat shock protein family (Hsp40) member B6                             | 7  | 157128075 | 157210133 | 82059  |
| CCL3          | C-C motif chemokine ligand 3                                                         | 17 | 34415602  | 34417515  | 1914   | EHBP1        | EH domain binding protein 1                                                  | 2  | 62900986  | 63273622  | 372637 |
| CCL5          | C-C motif chemokine ligand 5                                                         | 17 | 34198495  | 34207797  | 9303   | EHMT2        | euchromatic histone lysine methyltransferase 2                               | 6  | 31847536  | 31865464  | 17929  |
| CD24          | CD24 molecule                                                                        | 6  | 107417708 | 107422630 | 4923   | EPB41L1      | erythrocyte membrane protein band 4.1 like 1                                 | 20 | 34679426  | 34820721  | 141296 |
| CDA           | cytidine deaminase                                                                   | 1  | 20915441  | 20945401  | 29961  | EPHA4        | EPH receptor A4                                                              | 2  | 222282747 | 222438922 | 156176 |
| CEP104        | centrosomal protein 104                                                              | 1  | 3728645   | 3773778   | 45134  | ERLIN1       | ER lipid raft associated 1                                                   | 10 | 101909851 | 101948091 | 38241  |
| CEP164        | centrosomal protein 164                                                              | 11 | 117185273 | 117283984 | 98712  | FAM126A      | family with sequence similarity 126 member A                                 | 7  | 22980878  | 23053749  | 72872  |
| CHD5          | chromodomain helicase DNA binding protein 5                                          | 1  | 6161853   | 6240183   | 78331  | FAM193A      | family with sequence similarity 193 member A                                 | 4  | 2626988   | 2734292   | 107305 |
| CHRNA4        | cholinergic receptor nicotinic alpha 4 subunit                                       | 20 | 61975420  | 62009753  | 34334  | FBLN5        | fibulin 5                                                                    | 14 | 92335756  | 92414331  | 78576  |
| CIRBP         | cold inducible RNA binding protein                                                   | 19 | 1259384   | 1274879   | 15496  | FCHO2        | FCH domain only 2                                                            | 5  | 72251808  | 72386349  | 134542 |
| CLCNKA        | chloride voltage-gated channel Ka                                                    | 1  | 16345370  | 16360545  | 15176  | FGD4         | FYVE, RhoGEF and PH domain containing 4                                      | 12 | 32552463  | 32798984  | 246522 |
| CLCNKB        | chloride voltage-gated channel Kb                                                    | 1  | 16370272  | 16383803  | 13532  | FGFR3        | fibroblast growth factor receptor 3                                          | 4  | 1795034   | 1810599   | 15566  |
| CLN3          | CLN3, battenin                                                                       | 16 | 28477983  | 28506896  | 28914  | FKTN         | fukutin                                                                      | 9  | 108320411 | 108403399 | 82989  |
| CNTN2         | contactin 2                                                                          | 1  | 205012325 | 205047627 | 35303  | GRK5         | G protein-coupled receptor kinase 5                                          | 10 | 120967101 | 121215131 | 248031 |
| COL18A1       | collagen type XVIII alpha 1 chain                                                    | 21 | 46825052  | 46933634  | 108583 | GUSBP3       | glucuronidase, beta pseudogene 3                                             | 5  | 68790040  | 69006341  | 216302 |
| CSF1          | colony stimulating factor 1                                                          | 1  | 110452864 | 110473614 | 20751  | HERC1        | HECT and RLD domain containing E3 ubiquitin protein ligase family member 1   | 15 | 63900817  | 64126141  | 225325 |
| <b>CST3</b>   | cystatin C                                                                           | 20 | 23608534  | 23619110  | 10577  | HLA-DRA      | major histocompatibility complex, class II, DR alpha                         | 6  | 32407619  | 32412823  | 5205   |
| CSTB          | cystatin B                                                                           | 21 | 45192393  | 45196326  | 3934   | HLA-DRB5     | major histocompatibility complex, class II, DR beta 5                        | 6  | 32485120  | 32498064  | 12945  |
| CTSD          | cathepsin D                                                                          | 11 | 1773982   | 1785222   | 11241  | HNF4A        | hepatocyte nuclear factor 4 alpha                                            | 20 | 42984340  | 43061485  | 77146  |
| <b>CYP2D6</b> | cytochrome P450 family 2 subfamily D member 6                                        | 22 | 42522501  | 42526908  | 4408   | HSPA1A       | heat shock protein family A (Hsp70) member 1A                                | 6  | 31783291  | 31785723  | 2433   |
| CYP46A1       | cytochrome P450 family 46 subfamily A member 1                                       | 14 | 100150641 | 100193638 | 42998  | HSPA1B       | heat shock protein family A (Hsp70) member 1B                                | 6  | 31795512  | 31798031  | 2520   |
| CYTH1         | cytohesin 1                                                                          | 17 | 76670130  | 76778379  | 108250 | HSPA1L       | heat shock protein family A (Hsp70) member 1 like                            | 6  | 31777396  | 31783437  | 6042   |
| <b>DBH</b>    | dopamine beta-hydroxylase                                                            | 9  | 136501482 | 136524466 | 22985  | HSPA5        | heat shock protein family A (Hsp70) member 5                                 | 9  | 127997132 | 128003609 | 6478   |
| <b>DCTN1</b>  | dynactin subunit 1                                                                   | 2  | 74588281  | 74619214  | 30934  | HTT          | huntingtin                                                                   | 4  | 3076408   | 3245676   | 169269 |
| DDOST         | dolichyl-diphosphooligosaccharide--protein glycosyltransferase non-catalytic subunit | 1  | 20978270  | 20988000  | 9731   | HYKK         | hydroxylysine kinase                                                         | 15 | 78799906  | 78829714  | 29809  |
| <b>DEAF1</b>  | DEAF1, transcription factor                                                          | 11 | 644233    | 706715    | 62483  | IDE          | insulin degrading enzyme                                                     | 10 | 94211441  | 94333833  | 122393 |
| DHCR24        | 24-dehydrocholesterol reductase                                                      | 1  | 55315306  | 55352891  | 37586  | IL6          | interleukin 6                                                                | 7  | 22765503  | 22771621  | 6119   |
| DIDO1         | death inducer-obliterator 1                                                          | 20 | 61509090  | 61569304  | 60215  | IREB2        | iron responsive element binding protein 2                                    | 15 | 78729773  | 78793798  | 64026  |
| DNAH17        | dynein axonemal heavy chain 17                                                       | 17 | 76419778  | 76573476  | 153699 | ITGAE        | integrin subunit alpha E                                                     | 17 | 3617922   | 3704537   | 86616  |
| DNAJC6        | DnaJ heat shock protein family (Hsp40) member C6                                     | 1  | 65713902  | 65881552  | 167651 | KANSL1       | KAT8 regulatory NSL complex subunit 1                                        | 17 | 44107282  | 44302733  | 195452 |
| <b>DRD4</b>   | dopamine receptor D4                                                                 | 11 | 637293    | 640706    | 3414   | KAT6B        | lysine acetyltransferase 6B                                                  | 10 | 76585340  | 76792380  | 207041 |
| ECE1          | endothelin converting enzyme 1                                                       | 1  | 21543740  | 21671997  | 128258 | KCNAB1       | potassium voltage-gated channel subfamily A member regulatory beta subunit 1 | 3  | 155755490 | 156256545 | 501056 |
| EDF1          | endothelial differentiation related factor 1                                         | 9  | 139756571 | 139760738 | 4168   | <b>KCNQ5</b> | potassium voltage-gated channel subfamily Q member 5                         | 6  | 73331520  | 73908574  | 577055 |
| <b>EEF1D</b>  | eukaryotic translation elongation factor 1 delta                                     | 8  | 144661867 | 144681711 | 19845  | KIF11        | kinesin family member 11                                                     | 10 | 94353043  | 94415150  | 62108  |
| EIF4G3        | eukaryotic translation initiation factor 4 gamma 3                                   | 1  | 21132963  | 21503377  | 370415 | KIF2A        | kinesin family member 2A                                                     | 5  | 61601989  | 61833076  | 231088 |

|               |                                                       |    |           |           |        |                 |                                                                        |    |           |           |        |
|---------------|-------------------------------------------------------|----|-----------|-----------|--------|-----------------|------------------------------------------------------------------------|----|-----------|-----------|--------|
| ELK1          | ELK1, ETS transcription factor                        | X  | 47494920  | 47510003  | 15084  | LDLR            | low density lipoprotein receptor                                       | 19 | 11200038  | 11244492  | 44455  |
| FA2H          | fatty acid 2-hydroxylase                              | 16 | 74746853  | 74808729  | 61877  | LEKR1           | leucine, glutamate and lysine rich 1                                   | 3  | 156543270 | 156763918 | 220649 |
| FAM50A        | family with sequence similarity 50 member A           | X  | 153672473 | 153679002 | 6530   | MARVELD2        | MARVEL domain containing 2                                             | 5  | 68710939  | 68740157  | 29219  |
| FANCI         | Fanconi anemia complementation group I                | 15 | 89787180  | 89860492  | 73313  | MED14           | mediator complex subunit 14                                            | X  | 40507558  | 40595110  | 87553  |
| <b>FBXO42</b> | F-box protein 42                                      | 1  | 16573334  | 16678949  | 105616 | MGA             | MGA, MAX dimerization protein                                          | 15 | 41913422  | 42062141  | 148720 |
| FLNA          | filamin A                                             | X  | 153576892 | 153603006 | 26115  | MIR1268A        | microRNA 1268a                                                         | 15 | 22513229  | 22513280  | 52     |
| GAA           | glucosidase alpha, acid                               | 17 | 78075355  | 78093678  | 18324  | MIR548F1        | microRNA 548f-1                                                        | 10 | 56367634  | 56367717  | 84     |
| GAB3          | GRB2 associated binding protein 3                     | X  | 153903529 | 153979858 | 76330  | MKL1            | megakaryoblastic leukemia (translocation) 1                            | 22 | 40806285  | 41032706  | 226422 |
| GABRB3        | gamma-aminobutyric acid type A receptor beta3 subunit | 15 | 26788693  | 27184686  | 395994 | MKNK1           | MAP kinase interacting serine/threonine kinase 1                       | 1  | 47023090  | 47082515  | 59426  |
| GABRD         | gamma-aminobutyric acid type A receptor delta subunit | 1  | 1950780   | 1962192   | 11413  | MMP24           | matrix metalloproteinase 24                                            | 20 | 33814457  | 33864801  | 50345  |
| GAD1          | glutamate decarboxylase 1                             | 2  | 171669723 | 171717661 | 47939  | MRPS27          | mitochondrial ribosomal protein S27                                    | 5  | 71515236  | 71616473  | 101238 |
| GAMT          | guanidinoacetate N-methyltransferase                  | 19 | 1397091   | 1401569   | 4479   | <b>NAIP</b>     | NLR family apoptosis inhibitory protein                                | 5  | 70264310  | 70320941  | 56632  |
| GATA2         | GATA binding protein 2                                | 3  | 128198270 | 128212028 | 13759  | NDRG3           | NDRG family member 3                                                   | 20 | 35280169  | 35374481  | 94313  |
| GATA2-AS1     | GATA2 antisense RNA 1                                 | 3  | 128208036 | 128216768 | 8733   | NDUFAF1         | NADH:ubiquinone oxidoreductase complex assembly factor 1               | 15 | 41679551  | 41694717  | 15167  |
| GDNF          | glial cell derived neurotrophic factor                | 5  | 37812779  | 37839788  | 27010  | NDUFV2          | NADH:ubiquinone oxidoreductase core subunit V2                         | 18 | 9102628   | 9134343   | 31716  |
| GNA12         | G protein subunit alpha 12                            | 7  | 2767746   | 2883958   | 116213 | NF1             | neurofibromin 1                                                        | 17 | 29421945  | 29709134  | 287190 |
| GPSM3         | G protein signalling modulator 3                      | 6  | 32158543  | 32163300  | 4758   | NFS1            | NFS1, cysteine desulfurase                                             | 20 | 34255977  | 34287281  | 31305  |
| GRIA3         | glutamate ionotropic receptor AMPA type subunit 3     | X  | 122318006 | 122624766 | 306761 | <b>NIPA1</b>    | non imprinted in Prader-Willi/Angelman syndrome 1                      | 15 | 23043277  | 23100005  | 56729  |
| GRIN1         | glutamate ionotropic receptor NMDA type subunit 1     | 9  | 140032842 | 140063207 | 30366  | NIPA2           | non imprinted in Prader-Willi/Angelman syndrome 2                      | 15 | 23004684  | 23034427  | 29744  |
| GRIN2A        | glutamate ionotropic receptor NMDA type subunit 2A    | 16 | 9852376   | 10276611  | 424236 | NOP14           | NOP14 nucleolar protein                                                | 4  | 2939660   | 2965112   | 25453  |
| GRIN3B        | glutamate ionotropic receptor NMDA type subunit 3B    | 19 | 1000418   | 1009731   | 9314   | NR6A1           | nuclear receptor subfamily 6 group A member 1                          | 9  | 127279554 | 127533589 | 254036 |
| GRK6          | G protein-coupled receptor kinase 6                   | 5  | 176830205 | 176869902 | 39698  | NSF             | N-ethylmaleimide sensitive factor, vesicle fusing ATPase               | 17 | 44668035  | 44834830  | 166796 |
| <b>GSDMD</b>  | gasdermin D                                           | 8  | 144635377 | 144645232 | 9856   | NSUN4           | NOP2/Sun RNA methyltransferase family member 4                         | 1  | 46805849  | 46830824  | 24976  |
| GSPT2         | G1 to S phase transition 2                            | X  | 51486481  | 51489324  | 2844   | NUCKS1          | nuclear casein kinase and cyclin dependent kinase substrate 1          | 1  | 205681947 | 205719404 | 37458  |
| GSTM3         | glutathione S-transferase mu 3                        | 1  | 110276554 | 110284384 | 7831   | NUMB            | NUMB, endocytic adaptor protein                                        | 14 | 73741815  | 73930348  | 188534 |
| GSTT1         | glutathione S-transferase theta 1                     | 22 | 24376133  | 24384680  | 8548   | NUSAP1          | nucleolar and spindle associated protein 1                             | 15 | 41624892  | 41673248  | 48357  |
| HBB           | hemoglobin subunit beta                               | 11 | 5246694   | 5250625   | 3932   | PAFAH1B1        | platelet activating factor acetylhydrolase 1b regulatory subunit 1     | 17 | 2496504   | 2588909   | 92406  |
| HDAC6         | histone deacetylase 6                                 | X  | 48659784  | 48683392  | 23609  | <b>PELP1</b>    | proline, glutamate and leucine rich protein 1                          | 17 | 4574679   | 4607632   | 32954  |
| HLA-A         | major histocompatibility complex, class I, A          | 6  | 29909037  | 29913661  | 4625   | PHF20           | PHD finger protein 20                                                  | 20 | 34359896  | 34538303  | 178408 |
| HLA-DRB5      | major histocompatibility complex, class II, DR beta 5 | 6  | 32485120  | 32498064  | 12945  | PICALM          | phosphatidylinositol binding clathrin assembly protein                 | 11 | 85668727  | 85780924  | 112198 |
| HS1BP3        | HCLS1 binding protein 3                               | 2  | 20760208  | 20850849  | 90642  | PKIG            | cAMP-dependent protein kinase inhibitor gamma                          | 20 | 43160426  | 43252888  | 92463  |
| HSF2BP        | heat shock transcription factor 2 binding protein     | 21 | 44949072  | 45079374  | 130303 | PLXNA2          | plexin A2                                                              | 1  | 208195587 | 208417665 | 222079 |
| HSPG2         | heparan sulfate proteoglycan 2                        | 1  | 22148738  | 22263790  | 115053 | POLN            | DNA polymerase nu                                                      | 4  | 2073645   | 2243848   | 170204 |
| HTR6          | 5-hydroxytryptamine receptor 6                        | 1  | 19991780  | 20006055  | 14276  | POMGNT1         | protein O-linked mannose N-acetylglucosaminyltransferase 1 (beta 1,2-) | 1  | 46654354  | 46685977  | 31624  |
| IGF2          | insulin like growth factor 2                          | 11 | 2150342   | 2170833   | 20492  | <b>PPP1R13B</b> | protein phosphatase 1 regulatory subunit 13B                           | 14 | 104200089 | 104313927 | 113839 |
| IGSF21        | immunoglobulin superfamily member 21                  | 1  | 18434240  | 18704977  | 270738 | PSMA4           | proteasome subunit alpha 4                                             | 15 | 78832747  | 78841604  | 8858   |
| INS-IGF2      | INS-IGF2 readthrough                                  | 11 | 2153768   | 2182439   | 28672  | PUS10           | pseudouridylate synthase 10                                            | 2  | 61167357  | 61245394  | 78038  |

|            |                                                              |    |           |           |        |          |                                                                                 |    |           |           |        |
|------------|--------------------------------------------------------------|----|-----------|-----------|--------|----------|---------------------------------------------------------------------------------|----|-----------|-----------|--------|
| IQSEC2     | IQ motif and Sec7 domain 2                                   | X  | 53262058  | 53350522  | 88465  | RABGAP1L | RAB GTPase activating protein 1 like                                            | 1  | 174128548 | 174964445 | 835898 |
| ITGB2      | integrin subunit beta 2                                      | 21 | 46305868  | 46351904  | 46037  | RAP1GAP2 | RAP1 GTPase activating protein 2                                                | 17 | 2680350   | 2941033   | 260684 |
| IZUMO2     | IZUMO family member 2                                        | 19 | 50655805  | 50666452  | 10648  | REL      | REL proto-oncogene, NF-kB subunit                                               | 2  | 61108656  | 61158745  | 50090  |
| KCNC3      | potassium voltage-gated channel subfamily C member 3         | 19 | 50815194  | 50836772  | 21579  | RGS12    | regulator of G protein signaling 12                                             | 4  | 3294755   | 3441640   | 146886 |
| KCNJ11     | potassium voltage-gated channel subfamily J member 11        | 11 | 17407406  | 17410878  | 3473   | RIMS4    | regulating synaptic membrane exocytosis 4                                       | 20 | 43380449  | 43438979  | 58531  |
| KCNQ1      | potassium voltage-gated channel subfamily Q member 1         | 11 | 2465914   | 2870339   | 404426 | RNU6-83P | RNA, U6 small nuclear 83, pseudogene                                            | 13 | 99677488  | 99677599  | 112    |
| KCNQ2      | potassium voltage-gated channel subfamily Q member 2         | 20 | 62037542  | 62103993  | 66452  | RTN3     | reticulon 3                                                                     | 11 | 63448918  | 63527363  | 78446  |
| KCNT1      | potassium sodium-activated channel subfamily T member 1      | 9  | 138594031 | 138684992 | 90962  | SAMHD1   | SAM and HD domain containing deoxynucleoside triphosphate triphosphohydrolase 1 | 20 | 35518632  | 35580246  | 61615  |
| KDM5C      | lysine demethylase 5C                                        | X  | 53220503  | 53254604  | 34102  | SCAI     | suppressor of cancer cell invasion                                              | 9  | 127704887 | 127905785 | 200899 |
| KDM5D      | lysine demethylase 5D                                        | Y  | 21865751  | 21906825  | 41075  | SETX     | senataxin                                                                       | 9  | 135136743 | 135230372 | 93630  |
| KIF1A      | kinesin family member 1A                                     | 2  | 241653181 | 241759725 | 106545 | SIPA1L3  | signal induced proliferation associated 1 like 3                                | 19 | 38397868  | 38699012  | 301145 |
| KIF7       | kinesin family member 7                                      | 15 | 90152020  | 90198682  | 46663  | SLC17A5  | solute carrier family 17 member 5                                               | 6  | 74303102  | 74363878  | 60777  |
| KRTAP5-AS1 | KRTAP5-1/KRTAP5-2 antisense RNA 1                            | 11 | 1592583   | 1620414   | 27832  | SLC30A6  | solute carrier family 30 member 6                                               | 2  | 32390933  | 32449448  | 58516  |
| L1CAM      | L1 cell adhesion molecule                                    | X  | 153126969 | 153174677 | 47709  | SLC33A1  | solute carrier family 33 member 1                                               | 3  | 155538813 | 155572218 | 33406  |
| LDLRAD2    | low density lipoprotein receptor class A domain containing 2 | 1  | 22138758  | 22151714  | 12957  | SMN1     | survival of motor neuron 1, telomeric                                           | 5  | 70220768  | 70249769  | 29002  |
| LIMCH1     | LIM and calponin homology domains 1                          | 4  | 41361624  | 41702061  | 340438 | SMYD3    | SET and MYND domain containing 3                                                | 1  | 245912642 | 246670614 | 757973 |
| LIMS2      | LIM zinc finger domain containing 2                          | 2  | 128395956 | 128439360 | 43405  | SOS1     | SOS Ras/Rac guanine nucleotide exchange factor 1                                | 2  | 39208537  | 39351486  | 142950 |
| LINC01284  | long intergenic non-protein coding RNA 1284                  | X  | 51095844  | 51171400  | 75557  | SOS2     | SOS Ras/Rho guanine nucleotide exchange factor 2                                | 14 | 50583847  | 50698276  | 114430 |
| LMNA       | lamin A/C                                                    | 1  | 156052364 | 156109880 | 57517  | SPAST    | spastin                                                                         | 2  | 32288680  | 32382706  | 94027  |
| LMX1A      | LIM homeobox transcription factor 1 alpha                    | 1  | 165171104 | 165325952 | 154849 | SPG11    | SPG11, spatacsin vesicle trafficking associated                                 | 15 | 44854894  | 44955876  | 100983 |
| LMX1B      | LIM homeobox transcription factor 1 beta                     | 9  | 129376722 | 129463311 | 86590  | SPG21    | SPG21, maspardin                                                                | 15 | 65255362  | 65282648  | 27287  |
| LOX        | lysyl oxidase                                                | 5  | 121398890 | 121413980 | 15091  | SREBF2   | sterol regulatory element binding transcription factor 2                        | 22 | 42229109  | 42303312  | 74204  |
| LRP1       | LDL receptor related protein 1                               | 12 | 57522276  | 57607134  | 84859  | ST3GAL3  | ST3 beta-galactoside alpha-2,3-sialyltransferase 3                              | 1  | 44171495  | 44396831  | 225337 |
| MAN1B1     | mannosidase alpha class 1B member 1                          | 9  | 139981379 | 140003635 | 22257  | STIL     | SCL/TAL1 interrupting locus                                                     | 1  | 47715811  | 47779819  | 64009  |
| MAPK8IP1   | mitogen-activated protein kinase 8 interacting protein 1     | 11 | 45907202  | 45928016  | 20815  | STK4     | serine/threonine kinase 4                                                       | 20 | 43595115  | 43708600  | 113486 |
| MECP2      | methyl-CpG binding protein 2                                 | X  | 153287024 | 153363212 | 76189  | STRBP    | spermatid perinuclear RNA binding protein                                       | 9  | 125871779 | 126030855 | 159077 |
| MIR1-1HG   | MIR1-1 host gene                                             | 20 | 61147660  | 61167971  | 20312  | SUZ12    | SUZ12 polycomb repressive complex 2 subunit                                     | 17 | 30264037  | 30328064  | 64028  |
| MIR1268A   | microRNA 1268a membrane                                      | 15 | 22513229  | 22513280  | 52     | SYT10    | synaptotagmin 10                                                                | 12 | 33527173  | 33592754  | 65582  |
| MMEL1      | metalloendopeptidase like 1                                  | 1  | 2522078   | 2564481   | 42404  | TAF15    | TATA-box binding protein associated factor 15                                   | 17 | 34136459  | 34191619  | 55161  |
| MORN1      | MORN repeat containing 1                                     | 1  | 2252692   | 2323146   | 70455  | TDRD9    | tudor domain containing 9                                                       | 14 | 104394799 | 104519004 | 124206 |
| MPO        | myeloperoxidase                                              | 17 | 56347217  | 56358296  | 11080  | TEF      | TEF, PAR bZIP transcription factor                                              | 22 | 41763337  | 41795330  | 31994  |
| MVB12B     | multivesicular body subunit 12B                              | 9  | 129089128 | 129269320 | 180193 | TET1     | tet methylcytosine dioxygenase 1                                                | 10 | 70320413  | 70454239  | 133827 |
| MYH14      | myosin heavy chain 14                                        | 19 | 50691443  | 50813802  | 122360 | TFB2M    | transcription factor B2, mitochondrial                                          | 1  | 246703862 | 246729626 | 25765  |
| NAP1L4     | nucleosome assembly protein 1 like 4                         | 11 | 2965667   | 3013607   | 47941  | TIPARP   | TCDD inducible poly(ADP-ribose) polymerase                                      | 3  | 156391024 | 156424559 | 33536  |
| NDUFA6     | NADH:ubiquinone oxidoreductase subunit A6                    | 22 | 42481529  | 42486959  | 5431   | TLDC2    | TBC/LysM-associated domain containing 2                                         | 20 | 35504524  | 35522638  | 18115  |
| NDUF57     | NADH:ubiquinone oxidoreductase core subunit 57               | 19 | 1383526   | 1395583   | 12058  | TMEM17   | transmembrane protein 17                                                        | 2  | 62727356  | 62739029  | 11674  |
| NELFE      | negative elongation factor complex member E                  | 6  | 31919864  | 31926887  | 7024   | TMEM67   | transmembrane protein 67                                                        | 8  | 94767072  | 94831462  | 64391  |
| NFKB1      | nuclear factor kappa B subunit 1                             | 4  | 103422486 | 103538459 | 115974 | TRIP4    | thyroid hormone receptor interactor 4                                           | 15 | 64679947  | 64747502  | 67556  |

|              |                                                                                         |    |           |           |         |         |                                                                  |    |           |           |        |
|--------------|-----------------------------------------------------------------------------------------|----|-----------|-----------|---------|---------|------------------------------------------------------------------|----|-----------|-----------|--------|
| NOP56        | NOP56 ribonucleoprotein                                                                 | 20 | 2632791   | 2639039   | 6249    | TRPM7   | transient receptor potential cation channel subfamily M member 7 | 15 | 50844670  | 50979012  | 134343 |
| NOTCH4       | notch 4                                                                                 | 6  | 32162620  | 32191844  | 29225   | UBE3C   | ubiquitin protein ligase E3C                                     | 7  | 156931607 | 157062066 | 130460 |
| NPHP4        | nephrocystin 4                                                                          | 1  | 5922871   | 6052533   | 129663  | ULK2    | unc-51 like autophagy activating kinase 2                        | 17 | 19674142  | 19771249  | 97108  |
| NR1H2        | nuclear receptor subfamily 1 group H member 2                                           | 19 | 50832910  | 50886239  | 53330   | UQCC1   | ubiquinol-cytochrome c reductase complex assembly factor 1       | 20 | 33890369  | 33999944  | 109576 |
| NTRK1        | neurotrophic receptor tyrosine kinase 1                                                 | 1  | 156785432 | 156851642 | 66211   | USP34   | ubiquitin specific peptidase 34                                  | 2  | 61414598  | 61697904  | 283307 |
| NTRK2        | neurotrophic receptor tyrosine kinase 2                                                 | 9  | 87283466  | 87638505  | 355040  | UTP6    | UTP6, small subunit processome component                         | 17 | 30187923  | 30228784  | 40862  |
| NUDT1        | nudix hydrolase 1                                                                       | 7  | 2281857   | 2290781   | 8925    | VPS35   | VPS35, retromer complex component                                | 16 | 46690054  | 46723430  | 33377  |
| PANK2        | pantothenate kinase 2                                                                   | 20 | 3869486   | 3907605   | 38120   | VPS54   | VPS54, GARP complex subunit                                      | 2  | 64119280  | 64246206  | 126927 |
| PCDH11Y      | protocadherin 11 Y-linked                                                               | Y  | 4868267   | 5610265   | 741999  | WDPCP   | WD repeat containing planar cell polarity effector               | 2  | 63348518  | 64054977  | 706460 |
| PCSK9        | proprotein convertase subtilisin/kexin type 9                                           | 1  | 55505221  | 55530525  | 25305   | XPNPEP3 | X-prolyl aminopeptidase 3                                        | 22 | 41253081  | 41363838  | 110758 |
| PDXK         | pyridoxal kinase                                                                        | 21 | 45138975  | 45182188  | 43214   | ZBTB37  | zinc finger and BTB domain containing 37                         | 1  | 173837220 | 173872687 | 35468  |
| PDYN         | prodynorphin                                                                            | 20 | 1959403   | 1974732   | 15330   | ZFYVE28 | zinc finger FYVE-type containing 28                              | 4  | 2271309   | 2420390   | 149082 |
| PEX10        | peroxisomal biogenesis factor 10                                                        | 1  | 2336236   | 2345236   | 9001    | ZNF567  | zinc finger protein 567                                          | 19 | 37178514  | 37218603  | 40090  |
| PHOX2B       | paired like homeobox 2b                                                                 | 4  | 41746099  | 41750987  | 4889    | ZNF585A | zinc finger protein 585A                                         | 19 | 37597636  | 37663643  | 66008  |
| PIK3C2B      | phosphatidylinositol-4-phosphate 3-kinase catalytic subunit type 2 beta                 | 1  | 204391756 | 204463852 | 72097   |         |                                                                  |    |           |           |        |
| PIK3R5       | phosphoinositide-3-kinase regulatory subunit 5                                          | 17 | 8782233   | 8869029   | 86797   |         |                                                                  |    |           |           |        |
| PINK1        | PTEN induced putative kinase 1                                                          | 1  | 20959948  | 20978004  | 18057   |         |                                                                  |    |           |           |        |
| PINK1-AS     | PINK1 antisense RNA                                                                     | 1  | 20969150  | 20978686  | 9537    |         |                                                                  |    |           |           |        |
| PKD1         | polycystin 1, transient receptor potential channel interacting                          | 16 | 2138711   | 2185899   | 47189   |         |                                                                  |    |           |           |        |
| PLAT         | plasminogen activator, tissue type                                                      | 8  | 42032236  | 42065242  | 33007   |         |                                                                  |    |           |           |        |
| PLEC         | plectin                                                                                 | 8  | 144989321 | 145050902 | 61582   |         |                                                                  |    |           |           |        |
| PLEKHG5      | pleckstrin homology and RhoGEF domain containing G5                                     | 1  | 6526152   | 6580121   | 53970   |         |                                                                  |    |           |           |        |
| PLXNA2       | plexin A2                                                                               | 1  | 208195587 | 208417665 | 222079  |         |                                                                  |    |           |           |        |
| PNKP         | polynucleotide kinase 3'-phosphatase                                                    | 19 | 50364461  | 50371166  | 6706    |         |                                                                  |    |           |           |        |
| POLG         | DNA polymerase gamma, catalytic subunit                                                 | 15 | 89859534  | 89878092  | 18559   |         |                                                                  |    |           |           |        |
| PORCN        | porcupine homolog (Drosophila)                                                          | X  | 48367350  | 48379202  | 11853   |         |                                                                  |    |           |           |        |
| PPP1R3F      | protein phosphatase 1 regulatory subunit 3F                                             | X  | 49126306  | 49157929  | 31624   |         |                                                                  |    |           |           |        |
| PPP3CA       | protein phosphatase 3 catalytic subunit alpha                                           | 4  | 101944566 | 102269435 | 324870  |         |                                                                  |    |           |           |        |
| PRDM16       | PR/SET domain 16                                                                        | 1  | 2985732   | 3355185   | 369454  |         |                                                                  |    |           |           |        |
| PRKCZ        | protein kinase C zeta                                                                   | 1  | 1981909   | 2116834   | 134926  |         |                                                                  |    |           |           |        |
| PRKY         | protein kinase, Y-linked, pseudogene                                                    | Y  | 7142013   | 7249589   | 107577  |         |                                                                  |    |           |           |        |
| PRODH        | proline dehydrogenase 1                                                                 | 22 | 18900294  | 18924066  | 23773   |         |                                                                  |    |           |           |        |
| PSEN2        | presenilin 2                                                                            | 1  | 227057885 | 227083806 | 25922   |         |                                                                  |    |           |           |        |
| PTTG1IP      | PTTG1 interacting protein                                                               | 21 | 46269500  | 46293752  | 24253   |         |                                                                  |    |           |           |        |
| RAC2         | ras-related C3 botulinum toxin substrate 2 (rho family, small GTP binding protein Rac2) | 22 | 37621301  | 37640488  | 19188   |         |                                                                  |    |           |           |        |
| RBFOX1       | RNA binding protein, fox-1 homolog 1                                                    | 16 | 6069095   | 7763340   | 1694246 |         |                                                                  |    |           |           |        |
| RBFOX3       | RNA binding protein, fox-1 homolog 3                                                    | 17 | 77085427  | 77613550  | 528124  |         |                                                                  |    |           |           |        |
| RCC2         | regulator of chromosome condensation 2                                                  | 1  | 17733256  | 17766220  | 32965   |         |                                                                  |    |           |           |        |
| REEP2        | receptor accessory protein 2                                                            | 5  | 137774706 | 137782658 | 7953    |         |                                                                  |    |           |           |        |
| REN          | renin                                                                                   | 1  | 204123944 | 204135465 | 11522   |         |                                                                  |    |           |           |        |
| RER1         | retention in endoplasmic reticulum sorting receptor 1                                   | 1  | 2323267   | 2336883   | 13617   |         |                                                                  |    |           |           |        |
| RHCG         | Rh family C glycoprotein                                                                | 15 | 89998680  | 90039844  | 41165   |         |                                                                  |    |           |           |        |
| RNASEH2B-AS1 | RNASEH2B antisense RNA 1                                                                | 13 | 51450822  | 51484848  | 34027   |         |                                                                  |    |           |           |        |
| RRP8         | ribosomal RNA processing 8, methyltransferase, homolog (yeast)                          | 11 | 6616305   | 6624850   | 8546    |         |                                                                  |    |           |           |        |
| RXRA         | retinoid X receptor alpha                                                               | 9  | 137208944 | 137332431 | 123488  |         |                                                                  |    |           |           |        |



|                 |                                                                     |    |           |           |        |
|-----------------|---------------------------------------------------------------------|----|-----------|-----------|--------|
| RXRG            | retinoid X receptor gamma                                           | 1  | 165370159 | 165414433 | 44275  |
| SARM1           | sterile alpha and TIR motif containing 1                            | 17 | 26691378  | 26728065  | 36688  |
| SBNO2           | strawberry notch homolog 2                                          | 19 | 1107636   | 1174282   | 66647  |
| SCARB1          | scavenger receptor class B member 1                                 | 12 | 125261402 | 125367214 | 105813 |
| SDK1            | sidekick cell adhesion molecule 1                                   | 7  | 3341080   | 4308632   | 967553 |
| SEC16A          | SEC16 homolog A, endoplasmic reticulum export factor                | 9  | 139334549 | 139372141 | 37593  |
| SEPT3           | septin 3                                                            | 22 | 42372276  | 42394225  | 21950  |
| SEPT9           | septin 9                                                            | 17 | 75276651  | 75496678  | 220028 |
| SERPINF2        | serpin family F member 2                                            | 17 | 1646130   | 1658562   | 12433  |
| SETD3           | SET domain containing 3                                             | 14 | 99864083  | 99947216  | 83134  |
| SH2D2A          | SH2 domain containing 2A                                            | 1  | 156776035 | 156786654 | 10620  |
| SHROOM4         | shroom family member 4                                              | X  | 50334647  | 50557302  | 222656 |
| SLC25A22        | solute carrier family 25 member 22                                  | 11 | 790475    | 798316    | 7842   |
| SLC35A2         | solute carrier family 35 member A2                                  | X  | 48760459  | 48769235  | 8777   |
| SLC37A1         | solute carrier family 37 member 1                                   | 21 | 43916118  | 44001550  | 85433  |
| SLIT3           | slit guidance ligand 3                                              | 5  | 168088745 | 168728133 | 639389 |
| SNCAIP          | synuclein alpha interacting protein                                 | 5  | 121647049 | 121799914 | 152866 |
| SPECC1L         | sperm antigen with calponin homology and coiled-coil domains 1 like | 22 | 24666786  | 24813708  | 146923 |
| SPECC1L-ADORA2A | SPECC1L-ADORA2A readthrough (NMD candidate)                         | 22 | 24666866  | 24838324  | 171459 |
| SREBF1          | sterol regulatory element binding transcription factor 1            | 17 | 17713713  | 17740325  | 26613  |
| SS18L1          | SS18L1, nBAF chromatin remodeling complex subunit                   | 20 | 60718822  | 60757540  | 38719  |
| SSX5            | SSX family member 5                                                 | X  | 48045656  | 48056199  | 10544  |
| STIM1           | stromal interaction molecule 1                                      | 11 | 3875757   | 4114439   | 238683 |
| STK11           | serine/threonine kinase 11                                          | 19 | 1189406   | 1228428   | 39023  |
| SYN1            | synapsin I                                                          | X  | 47431303  | 47479252  | 47950  |
| SYT9            | synaptotagmin 9                                                     | 11 | 7260009   | 7490273   | 230265 |
| TBC1D16         | TBC1 domain family member 16                                        | 17 | 77906142  | 78009647  | 103506 |
| TBL1Y           | transducin beta like 1, Y-linked                                    | Y  | 6778727   | 6959724   | 180998 |
| TGM6            | transglutaminase 6                                                  | 20 | 2361554   | 2413399   | 51846  |
| TH              | tyrosine hydroxylase                                                | 11 | 2185159   | 2193107   | 7949   |
| TIMP2           | TIMP metallopeptidase inhibitor 2                                   | 17 | 76849059  | 76921469  | 72411  |
| TNRC6C          | trinucleotide repeat containing 6C                                  | 17 | 76000249  | 76104916  | 104668 |
| TOM1L2          | target of myb1 like 2 membrane trafficking protein                  | 17 | 17746828  | 17875736  | 128909 |
| TP73            | tumor protein p73                                                   | 1  | 3569084   | 3652765   | 83682  |
| TPP1            | tripeptidyl peptidase 1                                             | 11 | 6634000   | 6640692   | 6693   |
| TRAF2           | TNF receptor associated factor 2                                    | 9  | 139776364 | 139821059 | 44696  |
| TRIM5           | tripartite motif containing 5                                       | 11 | 5684425   | 5959849   | 275425 |
| TRPM7           | transient receptor potential cation channel subfamily M member 7    | 15 | 50844670  | 50979012  | 134343 |
| TSC1            | tuberous sclerosis 1                                                | 9  | 135766735 | 135820020 | 53286  |
| TSC2            | tuberous sclerosis 2                                                | 16 | 2097466   | 2138716   | 41251  |
| TSPEAR          | thrombospondin type laminin G domain and EAR repeats                | 21 | 45917775  | 46131495  | 213721 |
| TTY10           | testis-specific transcript, Y-linked 10 (non-protein coding)        | Y  | 22627554  | 22681114  | 53561  |
| TTY14           | testis-specific transcript, Y-linked 14 (non-protein coding)        | Y  | 21034387  | 21239302  | 204916 |
| UBASH3A         | ubiquitin associated and SH3 domain containing A                    | 21 | 43824008  | 43867791  | 43784  |
| UBE2I           | ubiquitin conjugating enzyme E2 I                                   | 16 | 1355548   | 1377019   | 21472  |
| UBR4            | ubiquitin protein ligase E3 component n-recognin 4                  | 1  | 19401000  | 19536770  | 135771 |
| UCHL1           | ubiquitin C-terminal hydrolase L1                                   | 4  | 41258430  | 41270472  | 12043  |
| UNKL            | unkempt family like zinc finger                                     | 16 | 1413206   | 1464752   | 51547  |

|                |                                               |    |           |           |        |
|----------------|-----------------------------------------------|----|-----------|-----------|--------|
| USP48          | ubiquitin specific peptidase 48               | 1  | 22004791  | 22110099  | 105309 |
| <b>VCP</b>     | valosin containing protein                    | 9  | 35056061  | 35073246  | 17186  |
| VWA5B1         | von Willebrand factor A domain containing 5B1 | 1  | 20617412  | 20681387  | 63976  |
| WDR13          | WD repeat domain 13                           | X  | 48448430  | 48463581  | 15152  |
| WDR45          | WD repeat domain 45                           | X  | 48929385  | 48958108  | 28724  |
| WWC1           | WW and C2 domain containing 1                 | 5  | 167718656 | 167899308 | 180653 |
| YTHDF1         | YTH N6-methyladenosine RNA binding protein 1  | 20 | 61826781  | 61847586  | 20806  |
| ZBTB46         | zinc finger and BTB domain containing 46      | 20 | 62375019  | 62462597  | 87579  |
| ZFYVE27        | zinc finger FYVE-type containing 27           | 10 | 99496878  | 99520664  | 23787  |
| ZNF182         | zinc finger protein 182                       | X  | 47834250  | 47863377  | 29128  |
| <b>ZNF512B</b> | zinc finger protein 512B                      | 20 | 62588055  | 62680113  | 92059  |

---

Supplementary Table 8. List of genes located in the most recurrent CNVs of SALS1 patients (penetrance &gt; 10%).

| Duplications |                                                                                             |            |                 |               |           |                  | Deletions |                                                                                      |            |                 |               |           |                  |
|--------------|---------------------------------------------------------------------------------------------|------------|-----------------|---------------|-----------|------------------|-----------|--------------------------------------------------------------------------------------|------------|-----------------|---------------|-----------|------------------|
| Gene name    | Gene description                                                                            | Chromosome | Gene start (bp) | Gene end (bp) | Size (bp) | Log2Ratio (Mean) | Gene name | Gene description                                                                     | Chromosome | Gene start (bp) | Gene end (bp) | Size (bp) | Log2Ratio (Mean) |
| ABHD2        | abhydrolase domain containing 2                                                             | 15         | 89630690        | 89745591      | 114902    | 0.723228         | ACE       | angiotensin I converting enzyme                                                      | 17         | 61554422        | 61599205      | 44784     | -1.544           |
| ACAN         | aggrecan                                                                                    | 15         | 89346674        | 89418585      | 71912     | 0.723228         | ADAM17    | ADAM metallopeptidase domain 17                                                      | 2          | 9628615         | 9695921       | 67307     | -0.526407        |
| ACHE         | acetylcholinesterase (Cartwright blood group)                                               | 7          | 100487615       | 100494594     | 6980      | 0.7050535        | ADAMTS6   | ADAM metallopeptidase with thrombospondin type 1 motif 6                             | 5          | 64444563        | 64777747      | 333185    | -0.525298        |
| ADGRG1       | adhesion G protein-coupled receptor G1 advanced glycosylation end-product specific receptor | 16         | 57653442        | 57698944      | 45503     | 0.701157         | ADK       | adenosine kinase                                                                     | 10         | 75910960        | 76469061      | 558102    | -0.53911         |
| AGER         | AKT serine/threonine kinase 1                                                               | 6          | 32148745        | 32152101      | 3357      | 0.618968         | ADSL      | adenylosuccinate lyase                                                               | 22         | 40742507        | 40786467      | 43961     | -1.262164        |
| AKT1         | AKT serine/threonine kinase 1                                                               | 14         | 105235686       | 105262088     | 26403     | 0.660989         | AHCY      | adenosylhomocysteinease                                                              | 20         | 32868074        | 32899608      | 31535     | -0.559453        |
| ALDH4A1      | aldehyde dehydrogenase 4 family member A1                                                   | 1          | 19197926        | 19229275      | 31350     | 0.641693         | ALG6      | ALG6, alpha-1,3-glucosyltransferase                                                  | 1          | 63833261        | 63904233      | 70973     | -0.663621        |
| ALPL         | alkaline phosphatase, liver/bone/kidney                                                     | 1          | 21835858        | 21904905      | 69048     | 0.641693         | AP4E1     | adaptor related protein complex 4 epsilon 1 subunit                                  | 15         | 51200869        | 51298097      | 97229     | -0.607008        |
| AP4S1        | adaptor related protein complex 4 sigma 1 subunit                                           | 14         | 31494312        | 31562818      | 68507     | 1.361322         | APH1B     | aph-1 homolog B, gamma-secretase subunit                                             | 15         | 63568217        | 63601325      | 33109     | -0.541159        |
| AP5Z1        | adaptor related protein complex 5 zeta 1 subunit                                            | 7          | 4815253         | 4833943       | 18691     | 0.718            | APOM      | apolipoprotein M                                                                     | 6          | 31620193        | 31625987      | 5795      | -0.297285        |
| ATP13A2      | ATPase 13A2                                                                                 | 1          | 17312453        | 17338423      | 25971     | 0.641693         | ARHGEF28  | Rho guanine nucleotide exchange factor 28                                            | 5          | 72921983        | 73237818      | 315836    | -0.773799        |
| ATPAF2       | ATP synthase mitochondrial F1 complex assembly factor 2                                     | 17         | 17880723        | 17942523      | 61801     | 0.73833333       | ARSB      | arylsulfatase B                                                                      | 5          | 78073032        | 78281910      | 208879    | -0.773799        |
| BIN1         | bridging integrator 1                                                                       | 2          | 127805603       | 127864931     | 59329     | 0.69319          | ATP6AP2   | ATPase H+ transporting accessory protein 2                                           | X          | 40440146        | 40465889      | 25744     | -0.67002         |
| C1QTNF1      | C1q and TNF related 1                                                                       | 17         | 77018896        | 77045870      | 26975     | 0.596693         | ATXN2     | ataxin 2                                                                             | 12         | 111890018       | 112037480     | 147463    | -0.484845        |
| C1QTNF1-AS1  | C1QTNF1 antisense RNA 1                                                                     | 17         | 77015291        | 77023737      | 8447      | 0.596693         | ATXN3     | ataxin 3                                                                             | 14         | 92524896        | 92572965      | 48070     | -0.654345        |
| C4A          | complement C4A (Rodgers blood group)                                                        | 6          | 31949801        | 31970458      | 20658     | 0.618968         | B3GNT2    | UDP-GlcNAc:betaGal beta-1,3-N-acetylglucosaminyltransferase 2                        | 2          | 62423248        | 62451866      | 28619     | -0.682618        |
| CABIN1       | calcineurin binding protein 1                                                               | 22         | 24407642        | 24574596      | 166955    | 0.575321         | BDP1      | B double prime 1, subunit of RNA polymerase III transcription initiation factor IIIB | 5          | 70751442        | 70863649      | 112208    | -0.773799        |
| CAPN3        | calpain 3                                                                                   | 15         | 42640301        | 42704516      | 64216     | 0.637835         | BIRC6     | baculoviral IAP repeat containing 6                                                  | 2          | 32582096        | 32843966      | 261871    | -0.634216        |
| CCL3         | C-C motif chemokine ligand 3                                                                | 17         | 34415602        | 34417515      | 1914      | 0.648784         | CA12      | carbonic anhydrase 12                                                                | 15         | 63613577        | 63674360      | 60784     | -0.624229        |
| CCL5         | C-C motif chemokine ligand 5                                                                | 17         | 34198495        | 34207797      | 9303      | 0.648784         | CASK      | calcium/calmodulin dependent serine protein kinase                                   | X          | 41374187        | 41782716      | 408530    | -0.67002         |
| CD24         | CD24 molecule                                                                               | 6          | 107417708       | 107422630     | 4923      | 1.08             | CBFA2T2   | CBFA2/RUNX1 translocation partner 2                                                  | 20         | 32077881        | 32237842      | 159962    | -0.559453        |
| CDA          | cytidine deaminase                                                                          | 1          | 20915441        | 20945401      | 29961     | 0.641693         | CBS       | cystathionine-beta-synthase                                                          | 21         | 44473301        | 44497053      | 23753     | -0.956621        |
| CEP104       | centrosomal protein 104                                                                     | 1          | 3728645         | 3773778       | 45134     | 0.526325         | CCDC144A  | coiled-coil domain containing 144A                                                   | 17         | 16592851        | 16707767      | 114917    | -0.543799        |
| CEP164       | centrosomal protein 164                                                                     | 11         | 117185273       | 117283984     | 98712     | 0.541087         | CCT4      | chaperonin containing TCP1 subunit 4                                                 | 2          | 62095224        | 62115939      | 20716     | -0.682618        |
| CHD5         | chromodomain helicase DNA binding protein 5                                                 | 1          | 6161853         | 6240183       | 78331     | 0.526325         | CHD2      | chromodomain helicase DNA binding protein 2                                          | 15         | 93426526        | 93571237      | 144712    | -0.624229        |
| CHRNA4       | cholinergic receptor nicotinic alpha 4 subunit                                              | 20         | 61975420        | 62009753      | 34334     | 0.625377         | CHMP4B    | charged multivesicular body protein 4B                                               | 20         | 32399110        | 32442172      | 43063     | -0.559453        |
| CLCNKA       | chloride voltage-gated channel Ka                                                           | 1          | 16345370        | 16360545      | 15176     | 0.641693         | CHP1      | calcineurin like EF-hand protein 1                                                   | 15         | 41523037        | 41574043      | 51007     | -0.624229        |
| CLCNKB       | chloride voltage-gated channel Kb                                                           | 1          | 16370272        | 16383803      | 13532     | 0.641693         | CNTNAP3   | contactin associated protein-like 3                                                  | 9          | 39072764        | 39288312      | 215549    | -1.295           |
| CLN3         | CLN3, battenin                                                                              | 16         | 28477983        | 28506896      | 28914     | 0.701157         | COG4      | component of oligomeric golgi complex 4                                              | 16         | 70514471        | 70557468      | 42998     | -0.657947        |
| CLTCL1       | clathrin heavy chain like 1                                                                 | 22         | 19166986        | 19279239      | 112254    | 0.575321         | COQ2      | coenzyme Q2, polyprenyltransferase                                                   | 4          | 84182689        | 84206067      | 23379     | -0.608374        |
| CNTN2        | contactin 2                                                                                 | 1          | 205012325       | 205047627     | 35303     | 0.332593         | COQ6      | coenzyme Q6, monoxygenase                                                            | 14         | 74416629        | 74430373      | 13745     | -0.531832        |
| CST3         | cystatin C                                                                                  | 20         | 23608534        | 23619110      | 10577     | 0.625377         | CR1       | complement C3b/C4b receptor 1 (Knops blood group)                                    | 1          | 207669492       | 207813992     | 144501    | -0.677425        |
| CYTH1        | cytohesin 1                                                                                 | 17         | 76670130        | 76778379      | 108250    | 0.596693         | CRLF3     | cytokine receptor like factor 3                                                      | 17         | 29096406        | 29151794      | 55389     | -0.956621        |
| DCTN1        | dynactin subunit 1                                                                          | 2          | 74588281        | 74619214      | 30934     | 0.5347745        | CSNK1G1   | casein kinase 1 gamma 1                                                              | 15         | 64457716        | 64648442      | 190727    | -0.624229        |
| DDOST        | dolichyl-diphosphooligosaccharide-protein glycosyltransferase non-catalytic subunit         | 1          | 20978270        | 20988000      | 9731      | 0.641693         | CWC27     | CWC27 spliceosome associated protein homolog                                         | 5          | 64064757        | 64314590      | 249834    | -0.525298        |
| DHCR24       | 24-dehydrocholesterol reductase                                                             | 1          | 55315306        | 55352891      | 37586     | 0.883039         | CYP2C19   | cytochrome P450 family 2 subfamily C member 19                                       | 10         | 96447911        | 96613017      | 165107    | -0.952624        |
| DNAH17       | dynein axonemal heavy chain 17                                                              | 17         | 76419778        | 76573476      | 153699    | 0.596693         | DAPK2     | death associated protein kinase 2                                                    | 15         | 64199235        | 64364232      | 164998    | -0.624229        |
| ECE1         | endothelin converting enzyme 1                                                              | 1          | 21543740        | 21671997      | 128258    | 0.641693         | DARS2     | aspartyl-tRNA synthetase 2, mitochondrial                                            | 1          | 173793641       | 173827684     | 34044     | -0.584528        |
| EEF1D        | eukaryotic translation elongation factor 1 delta                                            | 8          | 144661867       | 144681711     | 19845     | 0.557456         | DDX3X     | DEAD-box helicase 3, X-linked                                                        | X          | 41192651        | 41223725      | 31075     | -0.67002         |
| EIF4G3       | eukaryotic translation initiation factor 4 gamma 3                                          | 1          | 21132963        | 21503377      | 370415    | 0.641693         | DENND1A   | DENN domain containing 1A                                                            | 9          | 126141933       | 126692431     | 550499    | -0.605549        |
| F8           | coagulation factor VIII family with sequence similarity 50 member A                         | X          | 154064063       | 154255215     | 191153    | 0.533195         | DEPDC5    | DEP domain containing 5                                                              | 22         | 32149944        | 32303012      | 153069    | -0.591894        |
| FAM50A       | family with sequence similarity 50 member A                                                 | X          | 153672473       | 153679002     | 6530      | 0.533195         | DLGAP4    | DLG associated protein 4                                                             | 20         | 34894258        | 35157040      | 262783    | -0.737749        |

|          |                                                              |    |           |           |        |            |          |                                                                            |    |           |           |        |           |
|----------|--------------------------------------------------------------|----|-----------|-----------|--------|------------|----------|----------------------------------------------------------------------------|----|-----------|-----------|--------|-----------|
| FANCI    | Fanconi anemia complementation group I                       | 15 | 89787180  | 89860492  | 73313  | 0.723228   | DNAJB6   | DnaJ heat shock protein family (Hsp40) member B6                           | 7  | 157128075 | 157210133 | 82059  | -0.562186 |
| FBXO42   | F-box protein 42                                             | 1  | 16573334  | 16678949  | 105616 | 0.641693   | DPY30    | dpy-30, histone methyltransferase complex regulatory subunit               | 2  | 32092878  | 32264881  | 172004 | -0.682618 |
| FLNA     | filamin A                                                    | X  | 153576892 | 153603006 | 26115  | 0.5389445  | EHBP1    | EH domain binding protein 1                                                | 2  | 62900986  | 63273622  | 372637 | -0.682618 |
| GAA      | glucosidase alpha, acid                                      | 17 | 78075355  | 78093678  | 18324  | 0.596693   | EHMT2    | euchromatic histone lysine methyltransferase 2                             | 6  | 31847536  | 31865464  | 17929  | -0.594569 |
| GAB3     | GRB2 associated binding protein 3                            | X  | 153903529 | 153979858 | 76330  | 0.533195   | EPB41L1  | erythrocyte membrane protein band 4.1 like 1                               | 20 | 34679426  | 34820721  | 141296 | -0.737749 |
| GDNF     | glial cell derived neurotrophic factor                       | 5  | 37812779  | 37839788  | 27010  | 1.336      | EPHA4    | EPH receptor A4                                                            | 2  | 222282747 | 222438922 | 156176 | -1.037    |
| GRIA3    | glutamate ionotropic receptor AMPA type subunit 3            | X  | 122318006 | 122624766 | 306761 | 0.71429825 | FAM126A  | family with sequence similarity 126 member A                               | 7  | 22980878  | 23053749  | 72872  | -0.598219 |
| GRIN2A   | glutamate ionotropic receptor NMDA type subunit 2A           | 16 | 9852376   | 10276611  | 424236 | 0.545872   | FAM161B  | family with sequence similarity 161 member B                               | 14 | 74398204  | 74417117  | 18914  | -0.531832 |
| GRK6     | G protein-coupled receptor kinase 6                          | 5  | 176830205 | 176869902 | 39698  | 0.625797   | FAM193A  | family with sequence similarity 193 member A                               | 4  | 2626988   | 2734292   | 107305 | -0.708963 |
| GSDMD    | gasdermin D                                                  | 8  | 144635377 | 144645232 | 9856   | 0.557456   | FBLN5    | fibulin 5                                                                  | 14 | 92335756  | 92414331  | 78576  | -0.682712 |
| GSTT1    | glutathione S-transferase theta 1                            | 22 | 24376133  | 24384680  | 8548   | 1.1011605  | FCHO2    | FCH domain only 2                                                          | 5  | 72251808  | 72386349  | 134542 | -0.618199 |
| HIRA     | histone cell cycle regulator                                 | 22 | 19318221  | 19435224  | 117004 | 0.575321   | FGD4     | FYVE, RhoGEF and PH domain containing 4                                    | 12 | 32552463  | 32798984  | 246522 | -0.961062 |
| HLA-DRB5 | major histocompatibility complex, class II, DR beta 5        | 6  | 32485120  | 32498064  | 12945  | 0.309484   | FGFR3    | fibroblast growth factor receptor 3                                        | 4  | 1795034   | 1810599   | 15566  | -0.708963 |
| HS1BP3   | HCLS1 binding protein 3                                      | 2  | 20760208  | 20850849  | 90642  | 0.10316133 | FKTN     | fukutin                                                                    | 9  | 108320411 | 108403399 | 82989  | -0.758742 |
| HSPG2    | heparan sulfate proteoglycan 2                               | 1  | 22148738  | 22263790  | 115053 | 0.641693   | GRK5     | G protein-coupled receptor kinase 5                                        | 10 | 120967101 | 121215131 | 248031 | -1.3632   |
| HTR6     | 5-hydroxytryptamine receptor 6                               | 1  | 19991780  | 20006055  | 14276  | 0.641693   | GUSBP3   | glucuronidase, beta pseudogene 3                                           | 5  | 68790040  | 69006341  | 216302 | -0.618199 |
| IGF1     | insulin like growth factor 1                                 | 12 | 102789645 | 102874423 | 84779  | 1.068      | HERC1    | HECT and RLD domain containing E3 ubiquitin protein ligase family member 1 | 15 | 63900817  | 64126141  | 225325 | -0.624229 |
| IGF2     | insulin like growth factor 2                                 | 11 | 2150342   | 2170833   | 20492  | 0.541087   | HLA-DRA  | major histocompatibility complex, class II, DR alpha                       | 6  | 32407619  | 32412823  | 5205   | -0.40774  |
| IGSF21   | immunoglobulin superfamily member 21                         | 1  | 18434240  | 18704977  | 270738 | 0.641693   | HLA-DRB5 | major histocompatibility complex, class II, DR beta 5                      | 6  | 32485120  | 32498064  | 12945  | -0.91158  |
| KCNC3    | potassium voltage-gated channel subfamily C member 3         | 19 | 50815194  | 50836772  | 21579  | 0.731731   | HSPA1A   | heat shock protein family A (Hsp70) member 1A                              | 6  | 31783291  | 31785723  | 2433   | -0.696205 |
| KCNQ2    | potassium voltage-gated channel subfamily Q member 2         | 20 | 62037542  | 62103993  | 66452  | 0.625377   | HSPA1B   | heat shock protein family A (Hsp70) member 1B                              | 6  | 31795512  | 31798031  | 2520   | -0.696205 |
| KCNT1    | potassium sodium-activated channel subfamily T member 1      | 9  | 138594031 | 138684992 | 90962  | 0.9877315  | HSPA1L   | heat shock protein family A (Hsp70) member 1 like                          | 6  | 31777396  | 31783437  | 6042   | -0.696205 |
| KDM5D    | lysine demethylase 5D                                        | Y  | 21865751  | 21906825  | 41075  | 1.08       | HSPA5    | heat shock protein family A (Hsp70) member 5                               | 9  | 127997132 | 128003609 | 6478   | -0.758742 |
| KIF1A    | kinesin family member 1A                                     | 2  | 241653181 | 241759725 | 106545 | 0.6180155  | HTT      | huntingtin                                                                 | 4  | 3076408   | 3245676   | 169269 | -0.708963 |
| KIF7     | kinesin family member 7                                      | 15 | 90152020  | 90198682  | 46663  | 0.723228   | HYKK     | hydroxylysine kinase                                                       | 15 | 78799906  | 78829714  | 29809  | -0.677136 |
| L1CAM    | L1 cell adhesion molecule                                    | X  | 153126969 | 153174677 | 47709  | 0.5389445  | IDE      | insulin degrading enzyme                                                   | 10 | 94211441  | 94333833  | 122393 | -0.60181  |
| LDLRAD2  | low density lipoprotein receptor class A domain containing 2 | 1  | 22138758  | 22151714  | 12957  | 0.641693   | IL6      | interleukin 6                                                              | 7  | 22765503  | 22771621  | 6119   | -0.598219 |
| LIMCH1   | LIM and calponin homology domains 1                          | 4  | 41361624  | 41702061  | 340438 | 0.894707   | IPO11    | importin 11                                                                | 5  | 61699799  | 61924409  | 224611 | -0.525298 |
| LIMS2    | LIM zinc finger domain containing 2                          | 2  | 128395956 | 128439360 | 43405  | 0.69319    | IREB2    | iron responsive element binding protein 2                                  | 15 | 78729773  | 78793798  | 64026  | -0.677136 |
| LMX1A    | LIM homeobox transcription factor 1 alpha                    | 1  | 165171104 | 165325952 | 154849 | 0.641693   | ITGAE    | integrin subunit alpha E                                                   | 17 | 3617922   | 3704537   | 86616  | -0.551457 |
| LMX1B    | LIM homeobox transcription factor 1 beta                     | 9  | 129376722 | 129463311 | 86590  | 0.711392   | KANSL1   | KAT8 regulatory NSL complex subunit 1                                      | 17 | 44107282  | 44302733  | 195452 | -0.551457 |
| LRP1     | LDL receptor related protein 1                               | 12 | 57522276  | 57607134  | 84859  | 0.634824   | KAT6B    | lysine acetyltransferase 6B                                                | 10 | 76585340  | 76792380  | 207041 | -0.60181  |
| MC1R     | melanocortin 1 receptor                                      | 16 | 89978527  | 89987385  | 8859   | 0.545872   | KIF11    | kinesin family member 11                                                   | 10 | 94353043  | 94415150  | 62108  | -0.60181  |
| MECP2    | methyl-CpG binding protein 2                                 | X  | 153287024 | 153363212 | 76189  | 0.5389445  | KIF1B    | kinesin family member 1B                                                   | 1  | 10270863  | 10441661  | 170799 | -0.76503  |
| MIR1268A | microRNA 1268a membrane                                      | 15 | 22513229  | 22513280  | 52     |            | KIF2A    | kinesin family member 2A                                                   | 5  | 61601989  | 61833076  | 231088 | -0.525298 |
| MMEL1    | metalloendopeptidase like 1                                  | 1  | 2522078   | 2564481   | 42404  | 0.526325   | L2HGDH   | L-2-hydroxyglutarate dehydrogenase                                         | 14 | 50704281  | 50779266  | 74986  | -0.586852 |
| MPO      | myeloperoxidase                                              | 17 | 56347217  | 56358296  | 11080  | 0.557864   | LDLR     | low density lipoprotein receptor                                           | 19 | 11200038  | 11244492  | 44455  | -0.57591  |
| MVB12B   | multivesicular body subunit 12B                              | 9  | 129089128 | 129269320 | 180193 | 0.835427   | MARVELD2 | MARVEL domain containing 2                                                 | 5  | 68710939  | 68740157  | 29219  | -0.618199 |
| MYH14    | myosin heavy chain 14                                        | 19 | 50691443  | 50813802  | 122360 | 0.731731   | MED14    | mediator complex subunit 14                                                | X  | 40507558  | 40595110  | 87553  | -0.67002  |
| NELFE    | negative elongation factor complex member E                  | 6  | 31919864  | 31926887  | 7024   | 0.618968   | MGA      | MGA, MAX dimerization protein                                              | 15 | 41913422  | 42062141  | 148720 | -0.645528 |
| NPH4     | nephrocystin 4                                               | 1  | 5922871   | 6052533   | 129663 | 0.526325   | MKL1     | megakaryoblastic leukemia (translocation) 1                                | 22 | 40806285  | 41032706  | 226422 | -0.585327 |
| NTRK2    | neurotrophic receptor tyrosine kinase 2                      | 9  | 87283466  | 87638505  | 355040 | 0.835427   | MKNK1    | MAP kinase interacting serine/threonine kinase 1                           | 1  | 47023090  | 47082515  | 59426  | -0.687345 |
| PCDH11Y  | protocadherin 11 Y-linked                                    | Y  | 4868267   | 5610265   | 741999 | 1.517      | MMP24    | matrix metalloproteinase 24                                                | 20 | 33814457  | 33864801  | 50345  | -0.727813 |
| PCSK9    | proprotein convertase subtilisin/kexin type 9                | 1  | 55505221  | 55530525  | 25305  | 0.883039   | MPRIIP   | myosin phosphatase Rho interacting protein                                 | 17 | 16945859  | 17120993  | 175135 | -0.543799 |
| PDYN     | prodynorphin                                                 | 20 | 1959403   | 1974732   | 15330  | 0.625377   | MRPS27   | mitochondrial ribosomal protein S27                                        | 5  | 71515236  | 71616473  | 101238 | -0.773799 |
| PEX10    | peroxisomal biogenesis factor 10                             | 1  | 2336236   | 2345236   | 9001   | 0.526325   | MYH7B    | myosin heavy chain 7B                                                      | 20 | 33563206  | 33590240  | 27035  | -0.559453 |
| PHOX2B   | paired like homeobox 2b                                      | 4  | 41746099  | 41750987  | 4889   | 0.894707   | NAIP     | NLR family apoptosis inhibitory protein                                    | 5  | 70264310  | 70320941  | 56632  | -0.773799 |

|                 |                                                                                         |    |           |           |        |           |          |                                                                                 |    |           |           |        |           |
|-----------------|-----------------------------------------------------------------------------------------|----|-----------|-----------|--------|-----------|----------|---------------------------------------------------------------------------------|----|-----------|-----------|--------|-----------|
| PIK3C2B         | phosphatidylinositol-4-phosphate 3-kinase catalytic subunit type 2 beta                 | 1  | 204391756 | 204463852 | 72097  | 0.665186  | NDRG3    | NDRG family member 3                                                            | 20 | 35280169  | 35374481  | 94313  | -0.737749 |
| PIK3R5          | phosphoinositide-3-kinase regulatory subunit 5                                          | 17 | 8782233   | 8869029   | 86797  | 0.596693  | NDUFAF1  | NADH:ubiquinone oxidoreductase complex assembly factor 1                        | 15 | 41679551  | 41694717  | 15167  | -0.645528 |
| PINK1           | PTEN induced putative kinase 1                                                          | 1  | 20959948  | 20978004  | 18057  | 0.641693  | NDUFV2   | NADH:ubiquinone oxidoreductase core subunit V2                                  | 18 | 9102628   | 9134343   | 31716  | -0.771303 |
| PINK1-AS        | PINK1 antisense RNA                                                                     | 1  | 20969150  | 20978686  | 9537   | 0.641693  | NF1      | neurofibromin 1                                                                 | 17 | 29421945  | 29709134  | 287190 | -0.737749 |
| PLAT            | plasminogen activator, tissue type                                                      | 8  | 42032236  | 42065242  | 33007  | 0.603083  | NFS1     | NFS1, cysteine desulfurase                                                      | 20 | 34255977  | 34287281  | 31305  | -0.559453 |
| PLEC            | plectin                                                                                 | 8  | 144989321 | 145050902 | 61582  | 0.557456  | NIPA1    | non imprinted in Prader-Willi/Angelman syndrome 1                               | 15 | 23043277  | 23100005  | 56729  | -1.103854 |
| PLEKHG5         | pleckstrin homology and RhoGEF domain containing G5                                     | 1  | 6526152   | 6580121   | 53970  | 0.526325  | NIPA2    | non imprinted in Prader-Willi/Angelman syndrome 2                               | 15 | 23004684  | 23034427  | 29744  | -1.103854 |
| PLXNA2          | plexin A2                                                                               | 1  | 208195587 | 208417665 | 222079 | 0.6498045 | NOP14    | NOP14 nucleolar protein                                                         | 4  | 2939660   | 2965112   | 25453  | -0.708963 |
| POLG            | DNA polymerase gamma, catalytic subunit                                                 | 15 | 89859534  | 89878092  | 18559  | 0.723228  | NR6A1    | nuclear receptor subfamily 6 group A member 1                                   | 9  | 127279554 | 127533589 | 254036 | -0.605549 |
| PON1            | paraoxonase 1                                                                           | 7  | 94926988  | 95025673  | 98686  | 0.7050535 | NSF      | N-ethylmaleimide sensitive factor, vesicle fusing ATPase                        | 17 | 44668035  | 44834830  | 166796 | -0.551457 |
| PPP3CA          | protein phosphatase 3 catalytic subunit alpha                                           | 4  | 101944566 | 102269435 | 324870 | 0.894707  | NSUN4    | NOP2/Sun RNA methyltransferase family member 4                                  | 1  | 46805849  | 46830824  | 24976  | -0.687345 |
| PRDM16          | PR/SET domain 16                                                                        | 1  | 2985732   | 3355185   | 369454 | 0.526325  | NT5M     | 5',3'-nucleotidase, mitochondrial                                               | 17 | 17206649  | 17250977  | 44329  | -0.543799 |
| PRKY            | protein kinase, Y-linked, pseudogene                                                    | Y  | 7142013   | 7249589   | 107577 | 1.517     | NUMB     | NUMB, endocytic adaptor protein                                                 | 14 | 73741815  | 73930348  | 188534 | -0.681062 |
| PRODH           | proline dehydrogenase 1                                                                 | 22 | 18900294  | 18924066  | 23773  | 0.575321  | NUSAP1   | nucleolar and spindle associated protein 1                                      | 15 | 41624892  | 41673248  | 48357  | -0.645528 |
| RAB39B          | RAB39B, member RAS oncogene family                                                      | X  | 154487526 | 154493874 | 6349   | 0.533195  | PAFAH1B1 | platelet activating factor acetylhydrolase 1b regulatory subunit 1              | 17 | 2496504   | 2588909   | 92406  | -0.551457 |
| RAC2            | ras-related C3 botulinum toxin substrate 2 (rho family, small GTP binding protein Rac2) | 22 | 37621301  | 37640488  | 19188  | 0.575321  | PARP1    | poly(ADP-ribose) polymerase 1                                                   | 1  | 226548392 | 226595780 | 47389  | -0.930865 |
| RBFOX3          | RNA binding protein, fox-1 homolog 3                                                    | 17 | 77085427  | 77613550  | 528124 | 0.93128   | PELP1    | proline, glutamate and leucine rich protein 1                                   | 17 | 4574679   | 4607632   | 32954  | -0.551457 |
| RCC2            | regulator of chromosome condensation 2                                                  | 1  | 17733256  | 17766220  | 32965  | 0.641693  | PEX14    | peroxisomal biogenesis factor 14                                                | 1  | 10532345  | 10690815  | 158471 | -0.76503  |
| REEP2           | receptor accessory protein 2                                                            | 5  | 137774706 | 137782658 | 7953   | 0.630557  | PHF20    | PHD finger protein 20                                                           | 20 | 34359896  | 34538303  | 178408 | -0.737749 |
| REN             | renin                                                                                   | 1  | 204123944 | 204135465 | 11522  | 0.665186  | PICALM   | phosphatidylinositol binding clathrin assembly protein                          | 11 | 85668727  | 85780924  | 112198 | -0.683973 |
| RHCG            | Rh family C glycoprotein                                                                | 15 | 89998680  | 90039844  | 41165  | 0.723228  | PIGL     | phosphatidylinositol glycan anchor biosynthesis class L                         | 17 | 16120505  | 16252115  | 131611 | -0.543799 |
| RXRG            | retinoid X receptor gamma                                                               | 1  | 165370159 | 165414433 | 44275  |           | PLCB1    | phospholipase C beta 1                                                          | 20 | 8112824   | 8949003   | 836180 | -0.737749 |
| SCN8A           | sodium voltage-gated channel alpha subunit 8                                            | 12 | 51984050  | 52206648  | 222599 | 0.898473  | PNP      | purine nucleoside phosphorylase                                                 | 14 | 20937113  | 20945253  | 8141   | -0.953144 |
| SEPT9           | septin 9                                                                                | 17 | 75276651  | 75496678  | 220028 | 0.596693  | POLN     | DNA polymerase nu                                                               | 4  | 2073645   | 2243848   | 170204 | -0.708963 |
| SLIT3           | slit guidance ligand 3                                                                  | 5  | 168088745 | 168728133 | 639389 | 0.630557  | POMGNT1  | protein O-linked mannose N-acetylglucosaminyltransferase 1 (beta 1,2-)          | 1  | 46654354  | 46685977  | 31624  | -0.687345 |
| SPECC1L         | sperm antigen with calponin homology and coiled-coil domains 1 like                     | 22 | 24666786  | 24813708  | 146923 | 0.575321  | PPP1R13B | protein phosphatase 1 regulatory subunit 13B                                    | 14 | 104200089 | 104313927 | 113839 | -0.697744 |
| SPECC1L-ADORA2A | SPECC1L-ADORA2A readthrough (NMD candidate)                                             | 22 | 24666866  | 24838324  | 171459 | 0.575321  | PSMA4    | proteasome subunit alpha 4                                                      | 15 | 78832747  | 78841604  | 8858   | -0.624229 |
| SREBF1          | sterol regulatory element binding transcription factor 1                                | 17 | 17713713  | 17740325  | 26613  | 0.93128   | PTEN     | phosphatase and tensin homolog                                                  | 10 | 89622870  | 89731687  | 108818 | -0.60181  |
| SS18L1          | SS18L1, nBAF chromatin remodeling complex subunit                                       | 20 | 60718822  | 60757540  | 38719  | 0.625377  | PTK7     | protein tyrosine kinase 7 (inactive)                                            | 6  | 43044006  | 43129457  | 85452  | -0.564755 |
| SYNE1           | spectrin repeat containing nuclear envelope protein 1                                   | 6  | 152442819 | 152958936 | 516118 | 0.618968  | PUS10    | pseudouridylyl synthase 10                                                      | 2  | 61167357  | 61245394  | 78038  | -0.649384 |
| TAF15           | TATA-box binding protein associated factor 15                                           | 17 | 34136459  | 34191619  | 55161  | 0.324392  | RALY     | RALY heterogeneous nuclear ribonucleoprotein                                    | 20 | 32581452  | 32696114  | 114663 | -0.559453 |
| TBC1D16         | TBC1 domain family member 16                                                            | 17 | 77906142  | 78009647  | 103506 | 0.596693  | RAP1GAP2 | RAP1 GTPase activating protein 2                                                | 17 | 2680350   | 2941033   | 260684 | -0.551457 |
| TBL1Y           | transducin beta like 1, Y-linked                                                        | Y  | 6778727   | 6959724   | 180998 | 1.517     | RARS2    | arginyl-tRNA synthetase 2, mitochondrial                                        | 6  | 88224096  | 88299721  | 75626  | -0.860462 |
| TGM6            | transglutaminase 6                                                                      | 20 | 2361554   | 2413399   | 51846  | 0.625377  | REL      | REL proto-oncogene, NF-kB subunit                                               | 2  | 61108656  | 61158745  | 50090  | -0.649384 |
| TIMP2           | TIMP metalloproteinase inhibitor 2                                                      | 17 | 76849059  | 76921469  | 72411  | 0.596693  | RG512    | regulator of G protein signaling 12                                             | 4  | 3294755   | 3441640   | 146886 | -0.708963 |
| TNRC6C          | trinucleotide repeat containing GC target of myb1 like 2                                | 17 | 76000249  | 76104916  | 104668 | 0.596693  | RNF180   | ring finger protein 180                                                         | 5  | 63461671  | 63668696  | 207026 | -0.525298 |
| TOM1L2          | membrane trafficking protein                                                            | 17 | 17746828  | 17875736  | 128909 | 0.596693  | RNU6-83P | RNA, U6 small nuclear 83, pseudogene                                            | 13 | 99677488  | 99677599  | 112    | -0.674938 |
| TP73            | tumor protein p73                                                                       | 1  | 3569084   | 3652765   | 83682  | 0.526325  | RTN3     | reticulin 3                                                                     | 11 | 63448918  | 63527363  | 78446  | -0.683973 |
| TTY10           | testis-specific transcript, Y-linked 10 (non-protein coding)                            | Y  | 22627554  | 22681114  | 53561  | 1.08      | SAMHD1   | SAM and HD domain containing deoxynucleoside triphosphate triphosphohydrolase 1 | 20 | 35518632  | 35580246  | 61615  | -0.737749 |
| TTY14           | testis-specific transcript, Y-linked 14 (non-protein coding)                            | Y  | 21034387  | 21239302  | 204916 | 1.08      | SCAI     | suppressor of cancer cell invasion                                              | 9  | 127704887 | 127905785 | 200899 | -0.697678 |
| TUBB3           | tubulin beta 3 class III                                                                | 16 | 89987800  | 90005169  | 17370  | 0.545872  | SEPT3    | septin 3                                                                        | 22 | 42372276  | 42394225  | 21950  | -0.585327 |

|         |                                                   |    |           |           |        |          |         |                                                                                     |    |           |           |        |           |
|---------|---------------------------------------------------|----|-----------|-----------|--------|----------|---------|-------------------------------------------------------------------------------------|----|-----------|-----------|--------|-----------|
| UBR4    | ubiquitin protein ligase E3 component n-recogin 4 | 1  | 19401000  | 19536770  | 135771 | 0.641693 | SETX    | senataxin                                                                           | 9  | 135136743 | 135230372 | 93630  | -0.637964 |
| USP48   | ubiquitin specific peptidase 48                   | 1  | 22004791  | 22110099  | 105309 | 0.641693 | SGTB    | small glutamine rich tetratricopeptide repeat containing beta                       | 5  | 64961755  | 65018862  | 57108  | -0.525298 |
| VBP1    | VHL binding protein 1                             | X  | 154425284 | 154468098 | 42815  | 0.533195 | SLC30A6 | solute carrier family 30 member 6                                                   | 2  | 32390933  | 32449448  | 58516  | -0.649384 |
| VWASB1  | von Willebrand factor A domain containing 5B1     | 1  | 20617412  | 20681387  | 63976  | 0.641693 | SLC33A1 | solute carrier family 33 member 1                                                   | 3  | 155538813 | 155572218 | 33406  | -0.853769 |
| ZBTB46  | zinc finger and BTB domain containing 46          | 20 | 62375019  | 62462597  | 87579  | 0.625377 | SLC35A1 | solute carrier family 35 member A1                                                  | 6  | 88180341  | 88222054  | 41714  | -0.564755 |
| ZFYVE27 | zinc finger FYVE-type containing 27               | 10 | 99496878  | 99520664  | 23787  | 0.799744 | SMN1    | survival of motor neuron 1, telomeric                                               | 5  | 70220768  | 70249769  | 29002  | -0.773799 |
| ZNF512B | zinc finger protein 512B                          | 20 | 63956702  | 63969865  | 13164  | 0.625377 | SMYD3   | SET and MYND domain containing 3                                                    | 1  | 245912642 | 246670614 | 757973 | -0.929971 |
|         |                                                   |    |           |           |        |          | SOS2    | SOS Ras/Rho guanine nucleotide exchange factor 2                                    | 14 | 50583847  | 50698276  | 114430 | -0.659072 |
|         |                                                   |    |           |           |        |          | SPAST   | spastin                                                                             | 2  | 32288680  | 32382706  | 94027  | -0.649384 |
|         |                                                   |    |           |           |        |          | SPG11   | SPG11, spatacsin vesicle trafficking associated                                     | 15 | 44854894  | 44955876  | 100983 | -0.609004 |
|         |                                                   |    |           |           |        |          | SPG21   | SPG21, maspardin                                                                    | 15 | 65255362  | 65282648  | 27287  | -0.624229 |
|         |                                                   |    |           |           |        |          | SREBF2  | sterol regulatory element binding transcription factor 2                            | 22 | 42229109  | 42303312  | 74204  | -0.585327 |
|         |                                                   |    |           |           |        |          | ST3GAL3 | ST3 beta-galactoside alpha-2,3-sialyltransferase 3                                  | 1  | 44171495  | 44396831  | 225337 | -0.640765 |
|         |                                                   |    |           |           |        |          | STIL    | SCL/TAL1 interrupting locus                                                         | 1  | 47715811  | 47779819  | 64009  | -0.640765 |
|         |                                                   |    |           |           |        |          | STRBP   | spermatid perinuclear RNA binding protein                                           | 9  | 125871779 | 126030855 | 159077 | -0.605549 |
|         |                                                   |    |           |           |        |          | SUZ12   | SUZ12 polycomb repressive complex 2 subunit                                         | 17 | 30264037  | 30328064  | 64028  | -0.657847 |
|         |                                                   |    |           |           |        |          | SYT10   | synaptotagmin 10                                                                    | 12 | 33527173  | 33592754  | 65582  | -0.568094 |
|         |                                                   |    |           |           |        |          | TDRD9   | tudor domain containing 9                                                           | 14 | 104394799 | 104519004 | 124206 | -0.697744 |
|         |                                                   |    |           |           |        |          | TECPR2  | tectonin beta-propeller repeat containing 2                                         | 14 | 102829300 | 102968818 | 139519 | -0.753573 |
|         |                                                   |    |           |           |        |          | TEF     | TEF, PAR bZIP transcription factor                                                  | 22 | 41763337  | 41795330  | 31994  | -0.585327 |
|         |                                                   |    |           |           |        |          | TET1    | tet methylcytosine dioxygenase 1                                                    | 10 | 70320413  | 70454239  | 133827 | -0.60181  |
|         |                                                   |    |           |           |        |          | TFB2M   | transcription factor B2, mitochondrial                                              | 1  | 246703862 | 246729626 | 25765  | -1.365486 |
|         |                                                   |    |           |           |        |          | TLCD2   | TBC/LysM-associated domain containing 2                                             | 20 | 35504524  | 35522638  | 18115  | -0.559453 |
|         |                                                   |    |           |           |        |          | TMEM17  | transmembrane protein 17                                                            | 2  | 62727356  | 62739029  | 11674  | -0.649384 |
|         |                                                   |    |           |           |        |          | TMEM67  | transmembrane protein 67                                                            | 8  | 94767072  | 94831462  | 64391  | -0.791099 |
|         |                                                   |    |           |           |        |          | TRIP4   | thyroid hormone receptor interactor 4                                               | 15 | 64679947  | 64747502  | 67556  | -0.624229 |
|         |                                                   |    |           |           |        |          | TRPC4AP | transient receptor potential cation channel subfamily C member 4 associated protein | 20 | 33590207  | 33680674  | 90468  | -0.559453 |
|         |                                                   |    |           |           |        |          | TRPM7   | transient receptor potential cation channel subfamily M member 7                    | 15 | 50844670  | 50979012  | 134343 | -0.598606 |
|         |                                                   |    |           |           |        |          | UBE3C   | ubiquitin protein ligase E3C                                                        | 7  | 156931607 | 157062066 | 130460 | -0.562186 |
|         |                                                   |    |           |           |        |          | ULK2    | unc-51 like autophagy activating kinase 2                                           | 17 | 19674142  | 19771249  | 97108  | -0.683327 |
|         |                                                   |    |           |           |        |          | UQCC1   | ubiquinol-cytochrome c reductase complex assembly factor 1                          | 20 | 33890369  | 33999944  | 109576 | -0.559453 |
|         |                                                   |    |           |           |        |          | USP34   | ubiquitin specific peptidase 34                                                     | 2  | 61414598  | 61697904  | 283307 | -0.649384 |
|         |                                                   |    |           |           |        |          | UTP15   | UTP15, small subunit processome component                                           | 5  | 72861268  | 72877794  | 16527  | -0.648573 |
|         |                                                   |    |           |           |        |          | UTP6    | UTP6, small subunit processome component                                            | 17 | 30187923  | 30228784  | 40862  | -0.657847 |
|         |                                                   |    |           |           |        |          | VEGFA   | vascular endothelial growth factor A                                                | 6  | 43737921  | 43754224  | 16304  | -0.564755 |
|         |                                                   |    |           |           |        |          | VPS35   | VPS35, retromer complex component                                                   | 16 | 46690054  | 46723430  | 33377  | -0.657947 |
|         |                                                   |    |           |           |        |          | VPS54   | VPS54, GARP complex subunit                                                         | 2  | 64119280  | 64246206  | 126927 | -0.368232 |
|         |                                                   |    |           |           |        |          | WDPCP   | WD repeat containing planar cell polarity effector                                  | 2  | 63348518  | 64054977  | 706460 | -0.368232 |
|         |                                                   |    |           |           |        |          | XPNPEP3 | X-prolyl aminopeptidase 3                                                           | 22 | 41253081  | 41363838  | 110758 | -0.585327 |
|         |                                                   |    |           |           |        |          | XPO5    | exportin 5                                                                          | 6  | 43490072  | 43543812  | 53741  | -0.564755 |
|         |                                                   |    |           |           |        |          | ZFYVE28 | zinc finger FYVE-type containing 28                                                 | 4  | 2271309   | 2420390   | 149082 | -0.708963 |
|         |                                                   |    |           |           |        |          | ZNF287  | zinc finger protein 287                                                             | 17 | 16454701  | 16472520  | 17820  | -0.543799 |
|         |                                                   |    |           |           |        |          | ZNF318  | zinc finger protein 318                                                             | 6  | 43274872  | 43337216  | 62345  | -0.564755 |
|         |                                                   |    |           |           |        |          | ZSWIM7  | zinc finger SWIM-type containing 7                                                  | 17 | 15879874  | 15903031  | 23158  | -0.543799 |

Supplementary Table 9. List of genes located in the most recurrent CNVs of SALS2 patients (penetrance &gt; 10%).

| Duplications     |                                                              |            |                 |               |           |                  | Deletions |                                                                         |            |                 |               |           |
|------------------|--------------------------------------------------------------|------------|-----------------|---------------|-----------|------------------|-----------|-------------------------------------------------------------------------|------------|-----------------|---------------|-----------|
| Gene name        | Gene description                                             | Chromosome | Gene start (bp) | Gene end (bp) | Size (bp) | Log2Ratio (Mean) | Gene name | Gene description                                                        | Chromosome | Gene start (bp) | Gene end (bp) | Size (bp) |
| ABCA2            | ATP binding cassette subfamily A member 2                    | 9          | 139901686       | 139923367     | 21682     | 0.694392         | ABL2      | ABL proto-oncogene 2, non-receptor tyrosine kinase                      | 1          | 179068462       | 179198819     | 130358    |
| ABCA3            | ATP binding cassette subfamily A member 3                    | 16         | 2325882         | 2390747       | 64866     | 0.551909         | ACE       | angiotensin I converting enzyme                                         | 17         | 61554422        | 61599205      | 44784     |
| ABCC8            | ATP binding cassette subfamily C member 8                    | 11         | 17414432        | 17498449      | 84018     | 0.5762887        | ADAM9     | ADAM metalloproteinase domain 9                                         | 8          | 38854388        | 38962663      | 108276    |
| ABCG1            | ATP binding cassette subfamily G member 1                    | 21         | 43619799        | 43717354      | 97556     | 0.6119098        | ADK       | adenosine kinase                                                        | 10         | 75910960        | 76469061      | 558102    |
| ABHD2            | abhydrolase domain containing 2                              | 15         | 89630690        | 89745591      | 114902    | 0.5753199        | ADSL      | adenylosuccinate lyase                                                  | 22         | 40742507        | 40786467      | 43961     |
| ABLIM2           | actin binding LIM protein family member 2                    | 4          | 7967039         | 8160559       | 193521    | 0.5575473        | ALG6      | ALG6, alpha-1,3-glucosyltransferase                                     | 1          | 63833261        | 63904233      | 70973     |
| ACAN             | aggreccan                                                    | 15         | 89346674        | 89418585      | 71912     | 0.5753199        | AP4E1     | adaptor related protein complex 4 epsilon 1 subunit                     | 15         | 51200869        | 51298097      | 97229     |
| ACHE             | acetylcholinesterase (Cartwright blood group)                | 7          | 100487615       | 100494594     | 6980      | 0.835491         | ASTN1     | astrotactin 1                                                           | 1          | 176826438       | 177134109     | 307672    |
| ADARB1           | adenosine deaminase, RNA specific B1                         | 21         | 46493768        | 46646478      | 152711    | 0.6119098        | ATM       | ATM serine/threonine kinase                                             | 11         | 108093211       | 108239829     | 146619    |
| ADCY9            | adenylate cyclase 9                                          | 16         | 4003388         | 4166186       | 162799    | 0.551909         | ATXN2     | ataxin 2                                                                | 12         | 111890018       | 112037480     | 147463    |
| ADGRG1           | adhesion G protein-coupled receptor G1                       | 16         | 57653442        | 57698944      | 45503     | 0.551909         | ATXN3     | ataxin 3                                                                | 14         | 92524896        | 92572965      | 48070     |
| AFAP1            | actin filament associated protein 1                          | 4          | 7760441         | 7941653       | 181213    | 0.5575473        | BIRC6     | baculoviral IAP repeat containing 6                                     | 2          | 32582096        | 32843966      | 261871    |
| AGER             | advanced glycosylation end-product specific receptor         | 6          | 32148745        | 32152101      | 3357      | 0.6979757        | C12orf56  | chromosome 12 open reading frame 56                                     | 12         | 64660217        | 64784972      | 124756    |
| AKAP4            | A-kinase anchoring protein 4                                 | X          | 49955406        | 49965664      | 10259     | 0.58026          | CD109     | CD109 molecule                                                          | 6          | 74405508        | 74538040      | 132533    |
| AKT1             | AKT serine/threonine kinase 1                                | 14         | 105235686       | 105262088     | 26403     | 0.6005069        | CHP1      | calcineurin like EF-hand protein 1                                      | 15         | 41523037        | 41574043      | 51007     |
| ALAD             | aminolevulinic acid dehydratase                              | 9          | 116148597       | 116163613     | 15017     | 0.590879         | CHRNA3    | cholinergic receptor nicotinic alpha 3 subunit                          | 15         | 78885394        | 78913637      | 28244     |
| ALDH4A1          | aldehyde dehydrogenase 4 family member A1                    | 1          | 19197926        | 19229275      | 31350     | 0.5043603        | CHRNA5    | cholinergic receptor nicotinic alpha 5 subunit                          | 15         | 78857862        | 78887611      | 29750     |
| ALG1             | ALG1, chitobiosylidiphosphodolichol beta-mannosyltransferase | 16         | 5083703         | 5137380       | 53678     | 0.551909         | COQ2      | coenzyme Q2, polyprenyltransferase                                      | 4          | 84182689        | 84206067      | 23379     |
| ALPL             | alkaline phosphatase, liver/bone/kidney                      | 1          | 21835858        | 21904905      | 69048     | 0.5884203        | CR1       | complement C3b/C4b receptor 1 (Knops blood group)                       | 1          | 207669492       | 207813992     | 144501    |
| AMBRA1           | autophagy and beclin 1 regulator 1                           | 11         | 46417964        | 46615675      | 197712    | 0.609723         | CRLF3     | cytokine receptor like factor 3                                         | 17         | 29096406        | 29151794      | 55389     |
| ANO9             | anoctamin 9                                                  | 11         | 417933          | 442011        | 24079     | 0.589939         | CSNK1G1   | casein kinase 1 gamma 1                                                 | 15         | 64457716        | 64648442      | 190727    |
| AP2A2            | adaptor related protein complex 2 alpha 2 subunit            | 11         | 924894          | 1012239       | 87346     | 0.589939         | CUL4B     | culin 4B                                                                | X          | 119658464       | 119709649     | 51186     |
| AP4E1            | adaptor related protein complex 4 epsilon 1 subunit          | 15         | 51200869        | 51298097      | 97229     | 0.5420542        | DAPK2     | death associated protein kinase 2                                       | 15         | 64199235        | 64364232      | 164998    |
| AP4S1            | adaptor related protein complex 4 sigma 1 subunit            | 14         | 31494312        | 31562818      | 68507     | 1.1897469        | DARS2     | aspartyl-tRNA synthetase 2, mitochondrial                               | 1          | 173793641       | 173827684     | 34044     |
| AP5Z1            | adaptor related protein complex 5 zeta 1 subunit             | 7          | 4815253         | 4833943       | 18691     | 0.589939         | DDHD2     | DDHD domain containing 2                                                | 8          | 38082736        | 38133076      | 50341     |
| APBB1            | amyloid beta precursor protein binding family B member 1     | 11         | 6416355         | 6440644       | 24290     | 0.9882033        | DEPDC5    | DEP domain containing 5                                                 | 22         | 32149944        | 32303012      | 153069    |
| APBB2            | amyloid beta precursor protein binding family B member 2     | 4          | 40812044        | 41218731      | 406688    | 0.8738957        | DIP2B     | disco interacting protein 2 homolog B                                   | 12         | 50898768        | 51142450      | 243683    |
| ARHGEF9          | Cdc42 guanine nucleotide exchange factor 9                   | X          | 62854847        | 63005426      | 150580    | 0.5884203        | DLGAP4    | DLG associated protein 4                                                | 20         | 34894258        | 35157040      | 262783    |
| ATP13A2          | ATPase 13A2                                                  | 1          | 17312453        | 17338423      | 25971     | 0.033088         | EPB41L1   | erythrocyte membrane protein band 4.1 like 1                            | 20         | 34679426        | 34820721      | 141296    |
| BANK1            | B-cell scaffold protein with ankyrin repeats 1               | 4          | 102332443       | 102995969     | 663527    | 0.8441654        | EPHA4     | EPH receptor A4                                                         | 2          | 222282747       | 222438922     | 156176    |
| BCL11B           | B-cell CLL/lymphoma 11B                                      | 14         | 99635624        | 99737861      | 102238    | 0.5981354        | ERLIN1    | ER lipid raft associated 1 family with sequence similarity 126 member A | 10         | 101909851       | 101948091     | 38241     |
| BIN1             | bridging integrator 1                                        | 2          | 127805603       | 127864931     | 59329     | 0.644462         | FAM126A   | family with sequence similarity 126 member A                            | 7          | 22980878        | 23053749      | 72872     |
| BRD3             | bromodomain containing 3                                     | 9          | 136895427       | 136933657     | 38231     | 0.694392         | FAM193A   | family with sequence similarity 193 member A                            | 4          | 2626988         | 2734292       | 107305    |
| <b>C14orf177</b> | chromosome 14 open reading frame 177                         | 14         | 99177950        | 99184098      | 6149      | 0.5073495        | FBLN5     | fibulin 5                                                               | 14         | 92335756        | 92414331      | 78576     |
| C16orf89         | chromosome 16 open reading frame 89                          | 16         | 5094123         | 5116111       | 21989     | 0.551909         | FGD4      | FYVE, RhoGEF and PH domain containing 4                                 | 12         | 32552463        | 32798984      | 246522    |
| C1QTNF1          | C1q and TNF related 1                                        | 17         | 77018896        | 77045870      | 26975     | 0.621791         | FGFR1     | fibroblast growth factor receptor 1                                     | 8          | 38268656        | 38326352      | 57697     |
| C1QTNF1-AS1      | C1QTNF1 antisense RNA 1                                      | 17         | 77015291        | 77023737      | 8447      | 0.621791         | FGFR3     | fibroblast growth factor receptor 3                                     | 4          | 1795034         | 1810599       | 15566     |
| C4A              | complement C4A (Rodgers blood group)                         | 6          | 31949801        | 31970458      | 20658     | 0.6979757        | FILIP1    | filamin A interacting protein 1                                         | 6          | 76001575        | 76203454      | 201880    |
| CABIN1           | calcineurin binding protein 1                                | 22         | 24407642        | 24574596      | 166955    | 0.7796157        | FKTN      | fukutin                                                                 | 9          | 108320411       | 108403399     | 82989     |
| <b>CACNA1H</b>   | calcium voltage-gated channel subunit alpha1 H               | 16         | 1203241         | 1271771       | 68531     | 0.7071723        | GRK5      | G protein-coupled receptor kinase 5                                     | 10         | 120967101       | 121215131     | 248031    |
| CACNB4           | calcium voltage-gated channel auxiliary subunit beta 4       | 2          | 152689290       | 152955593     | 266304    | 0.5448835        | GUSBP3    | glucuronidase, beta pseudogene 3                                        | 5          | 68790040        | 69006341      | 216302    |
| CAMSAP1          | calmodulin regulated spectrin associated protein 1           | 9          | 138700333       | 138799074     | 98742     | 0.694392         | HLA-DRA   | major histocompatibility complex, class II, DR alpha                    | 6          | 32407619        | 32412823      | 5205      |
| CAPN3            | calpain 3                                                    | 15         | 42640301        | 42704516      | 64216     | 0.3195894        | HLA-DRB5  | major histocompatibility complex, class II, DR beta 5                   | 6          | 32485120        | 32498064      | 12945     |
| CARD11           | caspase recruitment domain family member 11                  | 7          | 2945775         | 3083579       | 137805    | 0.5919394        | HNF4A     | hepatocyte nuclear factor 4 alpha                                       | 20         | 42984340        | 43061485      | 77146     |
| CASP9            | caspase 9                                                    | 1          | 15817327        | 15853029      | 35703     | 0.4600978        | HSPAS5    | heat shock protein family A (Hsp70) member 5                            | 9          | 127997132       | 128003609     | 6478      |
| CBS              | cystathionine-beta-synthase                                  | 21         | 44473301        | 44497053      | 23753     | 0.7725278        | HTT       | huntingtin                                                              | 4          | 3076408         | 3245676       | 169269    |
| CCDC120          | coiled-coil domain containing 120                            | X          | 48911101        | 48927509      | 16409     | 0.58026          | HYKK      | hydroxylysine kinase                                                    | 15         | 78799906        | 78829714      | 29809     |
| CCKBR            | cholecystokinin B receptor                                   | 11         | 6280966         | 6293357       | 12392     | 0.589939         | IL6       | interleukin 6                                                           | 7          | 22765503        | 22771621      | 6119      |

|         |                                                                                      |    |           |           |        |           |          |                                                                                 |    |           |           |        |
|---------|--------------------------------------------------------------------------------------|----|-----------|-----------|--------|-----------|----------|---------------------------------------------------------------------------------|----|-----------|-----------|--------|
| CD24    | CD24 molecule                                                                        | 6  | 107417708 | 107422630 | 4923   | 1.0052812 | IREB2    | iron responsive element binding protein 2                                       | 15 | 78729773  | 78793798  | 64026  |
| CDA     | cytidine deaminase                                                                   | 1  | 20915441  | 20945401  | 29961  | 0.5884203 | ITGAE    | integrin subunit alpha E                                                        | 17 | 3617922   | 3704537   | 86616  |
| CEP104  | centrosomal protein 104                                                              | 1  | 3728645   | 3773778   | 45134  | 0.5884203 | KAT6B    | lysine acetyltransferase 6B                                                     | 10 | 76585340  | 76792380  | 207041 |
| CHD5    | chromodomain helicase DNA binding protein 5                                          | 1  | 6161853   | 6240183   | 78331  | 0.5861476 | KCNAB1   | potassium voltage-gated channel subfamily A member regulatory beta subunit 1    | 3  | 155755490 | 156256545 | 501056 |
| CHRNA4  | cholinergic receptor nicotinic alpha 4 subunit                                       | 20 | 61975420  | 62009753  | 34334  | 0.6292466 | KCNQ5    | potassium voltage-gated channel subfamily Q member 5                            | 6  | 73331520  | 73908574  | 577055 |
| CIRBP   | cold inducible RNA binding protein                                                   | 19 | 1259384   | 1274879   | 15496  | 0.7471475 | KIF11    | kinesin family member 11                                                        | 10 | 94353043  | 94415150  | 62108  |
| CLCNKA  | chloride voltage-gated channel Ka                                                    | 1  | 16345370  | 16360545  | 15176  | 0.5988849 | LEKR1    | leucine, glutamate and lysine rich 1                                            | 3  | 156543270 | 156763918 | 220649 |
| CLCNKB  | chloride voltage-gated channel Kb                                                    | 1  | 16370272  | 16383803  | 13532  | 0.5988849 | LETMD1   | LETM1 domain containing 1                                                       | 12 | 51441745  | 51454207  | 12463  |
| CLN3    | CLN3, battenin                                                                       | 16 | 28477983  | 28506896  | 28914  | 0.5629104 | MGA      | MGA, MAX dimerization protein                                                   | 15 | 41913422  | 42062141  | 148720 |
| CNTN2   | contactin 2                                                                          | 1  | 205012325 | 205047627 | 35303  | 0.636841  | MIR1268A | microRNA 1268a                                                                  | 15 | 22513229  | 22513280  | 52     |
| COG4    | component of oligomeric golgi complex 4                                              | 16 | 70514471  | 70557468  | 42998  | 0.4390636 | MIR548F1 | microRNA 548f-1                                                                 | 10 | 56367634  | 56367717  | 84     |
| COL18A1 | collagen type XVIII alpha 1 chain                                                    | 21 | 46825052  | 46933634  | 108583 | 0.6119098 | MKL1     | megakaryoblastic leukemia (translocation) 1                                     | 22 | 40806285  | 41032706  | 226422 |
| CPEB4   | cytoplasmic polyadenylation element binding protein 4                                | 5  | 173315283 | 173388979 | 73697  | 0.5299    | MKNK1    | MAP kinase interacting serine/threonine kinase 1                                | 1  | 47023090  | 47082515  | 59426  |
| CPZ     | carboxypeptidase Z                                                                   | 4  | 8594387   | 8621488   | 27102  | 0.5575473 | MMP24    | matrix metalloproteinase 24                                                     | 20 | 33814457  | 33864801  | 50345  |
| CREBBP  | CREB binding protein                                                                 | 16 | 3775055   | 3930727   | 155673 | 0.551909  | MMP9     | matrix metalloproteinase 9                                                      | 20 | 44637547  | 44645200  | 7654   |
| CRMP1   | collapsin response mediator protein 1                                                | 4  | 5749811   | 5894785   | 144975 | 0.5575473 | MYO6     | myosin VI                                                                       | 6  | 76458909  | 76629254  | 170346 |
| CRY2    | cryptochrome circadian clock 2                                                       | 11 | 45868669  | 45904798  | 36130  | 0.609723  | NDRG3    | NDRG family member 3                                                            | 20 | 35280169  | 35374481  | 94313  |
| CSF1    | colony stimulating factor 1                                                          | 1  | 110452864 | 110473614 | 20751  | 0.5301805 | NDUFAF1  | NADH:ubiquinone oxidoreductase complex assembly factor 1                        | 15 | 41679551  | 41694717  | 15167  |
| CST3    | cystatin C                                                                           | 20 | 23608534  | 23619110  | 10577  | 0.9021142 | NDUFV2   | NADH:ubiquinone oxidoreductase core subunit V2                                  | 18 | 9102628   | 9134343   | 31716  |
| CSTB    | cystatin B                                                                           | 21 | 45192393  | 45196326  | 3934   | 0.6119098 | NF1      | neurofibromin 1                                                                 | 17 | 29421945  | 29709134  | 287190 |
| CTDP1   | CTD phosphatase subunit 1                                                            | 18 | 77439801  | 77514510  | 74710  | 0.626131  | NFS1     | NFS1, cysteine desulfurase                                                      | 20 | 34255977  | 34287281  | 31305  |
| CTSD    | cathepsin D                                                                          | 11 | 1773982   | 1785222   | 11241  | 0.589939  | NIPA1    | non imprinted in Prader-Willi/Angelman syndrome 1                               | 15 | 23043277  | 23100005  | 56729  |
| CYP2D6  | cytochrome P450 family 2 subfamily D member 6                                        | 22 | 42522501  | 42526908  | 4408   | 0.6372778 | NIPA2    | non imprinted in Prader-Willi/Angelman syndrome 2                               | 15 | 23004684  | 23034427  | 29744  |
| CYP46A1 | cytochrome P450 family 46 subfamily A member 1                                       | 14 | 100150641 | 100193638 | 42998  | 0.5981354 | NOP14    | NOP14 nucleolar protein                                                         | 4  | 2939660   | 2965112   | 25453  |
| CYTH1   | cytohesin 1                                                                          | 17 | 76670130  | 76778379  | 108250 | 0.621791  | NSUN4    | NOP2/Sun RNA methyltransferase family member 4                                  | 1  | 46805849  | 46830824  | 24976  |
| DBH     | dopamine beta-hydroxylase                                                            | 9  | 136501482 | 136524466 | 22985  | 0.694392  | NUCKS1   | nuclear casein kinase and cyclin dependent kinase substrate 1                   | 1  | 205681947 | 205719404 | 37458  |
| DCTN1   | dynactin subunit 1                                                                   | 2  | 74588281  | 74619214  | 30934  | 0.63725   | NUSAP1   | nucleolar and spindle associated protein 1                                      | 15 | 41624892  | 41673248  | 48357  |
| DDOST   | dolichyl-diphosphooligosaccharide--protein glycosyltransferase non-catalytic subunit | 1  | 20978270  | 20988000  | 9731   | 0.5884203 | PAFAH1B1 | platelet activating factor acetylhydrolase 1b regulatory subunit 1              | 17 | 2496504   | 2588909   | 92406  |
| DEAF1   | DEAF1, transcription factor                                                          | 11 | 644233    | 706715    | 62483  | 0.589939  | PAPPA2   | pappalysin 2                                                                    | 1  | 176432307 | 176814735 | 382429 |
| DGKQ    | diacylglycerol kinase theta                                                          | 4  | 952675    | 980683    | 28009  | 0.5575473 | PELP1    | proline, glutamate and leucine rich protein 1                                   | 17 | 4574679   | 4607632   | 32954  |
| DHCR24  | 24-dehydrocholesterol reductase                                                      | 1  | 55315306  | 55352891  | 37586  | 0.6525684 | PHF20    | PHD finger protein 20                                                           | 20 | 34359896  | 34538303  | 178408 |
| DIDO1   | death inducer-obliterator 1                                                          | 20 | 61509090  | 61569304  | 60215  | 0.6180608 | PICALM   | phosphatidylinositol binding clathrin assembly protein                          | 11 | 85668727  | 85780924  | 112198 |
| DNAH17  | dynein axonemal heavy chain 17                                                       | 17 | 76419778  | 76573476  | 153699 | 0.621791  | PKIG     | cAMP-dependent protein kinase inhibitor gamma                                   | 20 | 43160426  | 43252888  | 92463  |
| DNAJC6  | DnaJ heat shock protein family (Hsp40) member C6                                     | 1  | 65713902  | 65881552  | 167651 | 0.995453  | PLXNA2   | plexin A2                                                                       | 1  | 208195587 | 208417665 | 222079 |
| DOCK2   | dedicator of cytokinesis 2                                                           | 5  | 169064251 | 169510386 | 446136 | 0.5299    | POLN     | DNA polymerase nu                                                               | 4  | 2073645   | 2243848   | 170204 |
| DRD1    | dopamine receptor D1                                                                 | 5  | 174867042 | 174871211 | 4170   | 0.5299    | POMGNT1  | protein O-linked mannose N-acetylglucosaminyltransferase 1 (beta 1,2-)          | 1  | 46654354  | 46685977  | 31624  |
| DRD4    | dopamine receptor D4                                                                 | 11 | 637293    | 640706    | 3414   | 0.589939  | PPP1R13B | protein phosphatase 1 regulatory subunit 13B                                    | 14 | 104200089 | 104313927 | 113839 |
| DRD5    | dopamine receptor D5                                                                 | 4  | 9783258   | 9785632   | 2375   | 0.540562  | PSMA4    | proteasome subunit alpha 4                                                      | 15 | 78832747  | 78841604  | 8858   |
| ECE1    | endothelin converting enzyme 1                                                       | 1  | 21543740  | 21671997  | 128258 | 0.5884203 | RABGAP1L | RAB GTPase activating protein 1 like                                            | 1  | 174128548 | 174964445 | 835898 |
| EDF1    | endothelial differentiation related factor 1                                         | 9  | 139756571 | 139760738 | 4168   | 0.694392  | RAP1GAP2 | RAP1 GTPase activating protein 2                                                | 17 | 2680350   | 2941033   | 260684 |
| EEF1D   | eukaryotic translation elongation factor 1 delta                                     | 8  | 144661867 | 144681711 | 19845  | 0.6315766 | RASAL2   | RAS protein activator like 2                                                    | 1  | 178062864 | 178448644 | 385781 |
| EIF4G3  | eukaryotic translation initiation factor 4 gamma 3                                   | 1  | 21132963  | 21503377  | 370415 | 0.5884203 | RGS12    | regulator of G protein signaling 12                                             | 4  | 3294755   | 3441640   | 146886 |
| ELFN2   | extracellular leucine rich repeat and fibronectin type III domain containing 2       | 22 | 37764000  | 37823505  | 59506  | 0.5478177 | RIMS4    | regulating synaptic membrane exocytosis 4                                       | 20 | 43380449  | 43438979  | 58531  |
| ELK1    | ELK1, ETS transcription factor                                                       | X  | 47494920  | 47510003  | 15084  | 0.58026   | RNU6-83P | RNA, U6 small nuclear 83, pseudogene                                            | 13 | 99677488  | 99677599  | 112    |
| F2      | coagulation factor II, thrombin                                                      | 11 | 46740730  | 46761056  | 20327  | 0.4572923 | SAMHD1   | SAM and HD domain containing deoxynucleoside triphosphate triphosphohydrolase 1 | 20 | 35518632  | 35580246  | 61615  |



|               |                                                       |    |           |           |        |           |          |                                                                  |    |           |           |        |
|---------------|-------------------------------------------------------|----|-----------|-----------|--------|-----------|----------|------------------------------------------------------------------|----|-----------|-----------|--------|
| FA2H          | fatty acid 2-hydroxylase                              | 16 | 74746853  | 74808729  | 61877  | 0.6553103 | SCAI     | suppressor of cancer cell invasion                               | 9  | 127704887 | 127905785 | 200899 |
| FANCI         | Fanconi anemia complementation group I                | 15 | 89787180  | 89860492  | 73313  | 0.5753199 | SENP6    | SUMO1/sentrin specific peptidase 6                               | 6  | 76311225  | 76427997  | 116773 |
| FARP1         | FERM, ARH/RhoGEF and pleckstrin domain protein 1      | 13 | 98794816  | 99102027  | 307212 | 0.6639247 | SETX     | senataxin                                                        | 9  | 135136743 | 135230372 | 93630  |
| <b>FBXO42</b> | F-box protein 42                                      | 1  | 16573334  | 16678949  | 105616 | 0.5884203 | SIP1L3   | signal induced proliferation associated 1 like 3                 | 19 | 38397868  | 38699012  | 301145 |
| FBXW11        | F-box and WD repeat domain containing 11              | 5  | 171288553 | 171433877 | 145325 | 0.5299    | SLC11A2  | solute carrier family 11 member 2                                | 12 | 51373184  | 51422349  | 49166  |
| FLNA          | filamin A                                             | X  | 153576892 | 153603006 | 26115  | 0.6237213 | SLC17A5  | solute carrier family 17 member 5                                | 6  | 74303102  | 74363878  | 60777  |
| GAA           | glucosidase alpha, acid                               | 17 | 78075355  | 78093678  | 18324  | 0.621791  | SLC30A6  | solute carrier family 30 member 6                                | 2  | 32390933  | 32449448  | 58516  |
| GABRB3        | gamma-aminobutyric acid type A receptor beta3 subunit | 15 | 26788693  | 27184686  | 395994 | 0.8187364 | SLC33A1  | solute carrier family 33 member 1                                | 3  | 155538813 | 155572218 | 33406  |
| GABRD         | gamma-aminobutyric acid type A receptor delta subunit | 1  | 1950780   | 1962192   | 11413  | 0.4622    | SMN1     | survival of motor neuron 1, telomeric                            | 5  | 70220768  | 70249769  | 29002  |
| GAD1          | glutamate decarboxylase 1                             | 2  | 171669723 | 171717661 | 47939  | 0.7396482 | SMYD3    | SET and MYND domain containing 3                                 | 1  | 245912642 | 246670614 | 757973 |
| GAK           | cyclin G associated kinase                            | 4  | 843064    | 926161    | 83098  | 0.5575473 | SOAT1    | sterol O-acyltransferase 1                                       | 1  | 179262925 | 179327815 | 64891  |
| GAMT          | guanidinoacetate N-methyltransferase                  | 19 | 1397091   | 1401569   | 4479   | 0.7471475 | SOS1     | SOS Ras/Rac guanine nucleotide exchange factor 1                 | 2  | 39208537  | 39351486  | 142950 |
| GATA2         | GATA binding protein 2                                | 3  | 128198270 | 128212028 | 13759  | 0.7199733 | SOS2     | SOS Ras/Rho guanine nucleotide exchange factor 2                 | 14 | 50583847  | 50698276  | 114430 |
| GATA2-AS1     | GATA2 antisense RNA 1                                 | 3  | 128208036 | 128216768 | 8733   | 0.7199733 | SPAST    | spastin                                                          | 2  | 32288680  | 32382706  | 94027  |
| GDNF          | glial cell derived neurotrophic factor                | 5  | 37812779  | 37839788  | 27010  | 1.1191921 | SPATS2   | spermatogenesis associated serine rich 2                         | 12 | 49760367  | 49921205  | 160839 |
| GLG1          | golgi glycoprotein 1                                  | 16 | 74485856  | 74641012  | 155157 | 0.5259785 | SPG11    | SPG11, spatacsin vesicle trafficking associated                  | 15 | 44854894  | 44955876  | 100983 |
| GLYR1         | glyoxylate reductase 1 homolog                        | 16 | 4853204   | 4897343   | 44140  | 0.551909  | SPG21    | SPG21, maspardin                                                 | 15 | 65255362  | 65282648  | 27287  |
| GNA12         | G protein subunit alpha 12                            | 7  | 2767746   | 2883958   | 116213 | 0.5919394 | SREBF2   | sterol regulatory element binding transcription factor 2         | 22 | 42229109  | 42303312  | 74204  |
| GPSM3         | G protein signaling modulator 3                       | 6  | 32158543  | 32163300  | 4758   | 0.655532  | SRGAP1   | SLIT-ROBO Rho GTPase activating protein 1                        | 12 | 64238073  | 64541613  | 303541 |
| GRIA3         | glutamate ionotropic receptor AMPA type subunit 3     | X  | 122318006 | 122624766 | 306761 | 0.7209059 | ST3GAL3  | ST3 beta-galactoside alpha-2,3-sialyltransferase 3               | 1  | 44171495  | 44396831  | 225337 |
| GRIN1         | glutamate ionotropic receptor NMDA type subunit 1     | 9  | 140032842 | 140063207 | 30366  | 0.694392  | STIL     | SCL/TAL1 interrupting locus                                      | 1  | 47715811  | 47779819  | 64009  |
| GRIN2A        | glutamate ionotropic receptor NMDA type subunit 2A    | 16 | 9852376   | 10276611  | 424236 | 0.8357534 | STK4     | serine/threonine kinase 4                                        | 20 | 43595115  | 43708600  | 113486 |
| GRIN3B        | glutamate ionotropic receptor NMDA type subunit 3B    | 19 | 1000418   | 1009731   | 9314   | 0.7471475 | SUZ12    | SUZ12 polycomb repressive complex 2 subunit                      | 17 | 30264037  | 30328064  | 64028  |
| GRK6          | G protein-coupled receptor kinase 6                   | 5  | 176830205 | 176869902 | 39698  | 0.5927958 | TAF15    | TATA-box binding protein associated factor 15                    | 17 | 34136459  | 34191619  | 55161  |
| <b>GSDMD</b>  | gasdermin D                                           | 8  | 144635377 | 144645232 | 9856   | 0.6315766 | TBK1     | TANK binding kinase 1                                            | 12 | 64845660  | 64895888  | 50229  |
| GSPT2         | G1 to S phase transition 2                            | X  | 51486481  | 51489324  | 2844   | 0.58026   | TDRD9    | tudor domain containing 9                                        | 14 | 104394799 | 104519004 | 124206 |
| GSTM3         | glutathione S-transferase mu 3                        | 1  | 110276554 | 110284384 | 7831   | 0.5301805 | TEF      | TEF, PAR bZIP transcription factor                               | 22 | 41763337  | 41795330  | 31994  |
| GSTT1         | glutathione S-transferase theta 1                     | 22 | 24376133  | 24384680  | 8548   | 1.1054935 | TET1     | tet methylcytosine dioxygenase 1                                 | 10 | 70320413  | 70454239  | 133827 |
| HBB           | hemoglobin subunit beta                               | 11 | 5246694   | 5250625   | 3932   | 0.589939  | TFB2M    | transcription factor B2, mitochondrial                           | 1  | 246703862 | 246729626 | 25765  |
| HDAC6         | histone deacetylase 6                                 | X  | 48659784  | 48683392  | 23609  | 0.58026   | TFCP2    | transcription factor CP2                                         | 12 | 51487446  | 51566926  | 79481  |
| HLA-A         | major histocompatibility complex, class I, A          | 6  | 29909037  | 29913661  | 4625   | 0.9732702 | TIPARP   | TCDD inducible poly(ADP-ribose) polymerase                       | 3  | 156391024 | 156424559 | 33536  |
| HLA-DRB5      | major histocompatibility complex, class II, DR beta 5 | 6  | 32485120  | 32498064  | 12945  | 0.5135375 | TLOC2    | TBC/LysM-associated domain containing 2                          | 20 | 35504524  | 35522638  | 18115  |
| HMOX2         | heme oxygenase 2                                      | 16 | 4524691   | 4560348   | 35658  | 0.551909  | TMEM5    | transmembrane protein 5                                          | 12 | 64173583  | 64203338  | 29756  |
| HP            | haptoglobin                                           | 16 | 72088491  | 72094954  | 6464   | 0.5259785 | TMEM67   | transmembrane protein 67                                         | 8  | 94767072  | 94831462  | 64391  |
| HS1BP3        | HCLS1 binding protein 3                               | 2  | 20760208  | 20850849  | 90642  | 0.6359472 | TNR      | tenascin R                                                       | 1  | 175284330 | 175712906 | 428577 |
| HSF2BP        | heat shock transcription factor 2 binding protein     | 21 | 44949072  | 45079374  | 130303 | 0.6119098 | TRIP4    | thyroid hormone receptor interactor 4                            | 15 | 64679947  | 64747502  | 67556  |
| HSPG2         | heparan sulfate proteoglycan 2                        | 1  | 22148738  | 22263790  | 115053 | 0.5781296 | TRPM7    | transient receptor potential cation channel subfamily M member 7 | 15 | 50844670  | 50979012  | 134343 |
| HTR6          | 5-hydroxytryptamine receptor 6                        | 1  | 19991780  | 20006055  | 14276  | 0.5884203 | ULK2     | unc-51 like autophagy activating kinase 2                        | 17 | 19674142  | 19771249  | 97108  |
| IDE           | insulin degrading enzyme                              | 10 | 94211441  | 94333833  | 122393 | 0.2374174 | UQCCL1   | ubiquinol-cytochrome c reductase complex assembly factor 1       | 20 | 33890369  | 33999944  | 109576 |
| IGF2          | insulin like growth factor 2                          | 11 | 2150342   | 2170833   | 20492  | 0.7673512 | UTP6     | UTP6, small subunit processome component                         | 17 | 30187923  | 30228784  | 40862  |
| IGSF21        | immunoglobulin superfamily member 21                  | 1  | 18434240  | 18704977  | 270738 | 0.5884203 | VPS35    | VPS35, retromer complex component                                | 16 | 46690054  | 46723430  | 33377  |
| INS-IGF2      | INS-IGF2 readthrough                                  | 11 | 2153768   | 2182439   | 28672  | 0.7673512 | VPS54    | VPS54, GARP complex subunit                                      | 2  | 64119280  | 64246206  | 126927 |
| IQSEC2        | IQ motif and Sec7 domain 2                            | X  | 53262058  | 53350522  | 88465  | 0.58026   | XPNPPEP3 | X-prolyl aminopeptidase 3                                        | 22 | 41253081  | 41363838  | 110758 |
| ITGB2         | integrin subunit beta 2                               | 21 | 46305868  | 46351904  | 46037  | 0.6119098 | ZBTB37   | zinc finger and BTB domain containing 37                         | 1  | 173837220 | 173872687 | 35468  |
| ITPKB         | inositol-trisphosphate 3-kinase B                     | 1  | 226819391 | 226927024 | 107634 | 0.6475943 | ZFYVE28  | zinc finger FYVE-type containing 28                              | 4  | 2271309   | 2420390   | 149082 |
| IZUMO2        | IZUMO family member 2                                 | 19 | 50655805  | 50666452  | 10648  | 0.588151  | ZNF567   | zinc finger protein 567                                          | 19 | 36687612  | 36727701  | 40090  |
| JAKMIP1       | janus kinase and microtubule interacting protein 1    | 4  | 6027926   | 6202318   | 174393 | 0.5575473 | ZNF585A  | zinc finger protein 585A                                         | 19 | 37106734  | 37172741  | 66008  |
| KCNC3         | potassium voltage-gated channel subfamily C member 3  | 19 | 50815194  | 50836772  | 21579  | 0.588151  |          |                                                                  |    |           |           |        |
| KCNIP1        | potassium voltage-gated channel interacting protein 1 | 5  | 169780491 | 170163636 | 383146 | 0.5299    |          |                                                                  |    |           |           |        |
| KCNJ11        | potassium voltage-gated channel subfamily J member 11 | 11 | 17407406  | 17410878  | 3473   | 0.5815642 |          |                                                                  |    |           |           |        |

|            |                                                              |    |           |           |        |           |
|------------|--------------------------------------------------------------|----|-----------|-----------|--------|-----------|
| KCNQ1      | potassium voltage-gated channel subfamily Q member 1         | 11 | 2465914   | 2870339   | 404426 | 0.589939  |
| KCNQ2      | potassium voltage-gated channel subfamily Q member 2         | 20 | 62037542  | 62103993  | 66452  | 0.623586  |
| KCNT1      | potassium sodium-activated channel subfamily T member 1      | 9  | 138594031 | 138684992 | 90962  | 0.7767136 |
| KDM5C      | lysine demethylase 5C                                        | X  | 53220503  | 53254604  | 34102  | 0.58026   |
| KDM5D      | lysine demethylase 5D                                        | Y  | 21865751  | 21906825  | 41075  | 1.0052812 |
| KIAA0232   | KIAA0232                                                     | 4  | 6783102   | 6885897   | 102796 | 0.5575473 |
| KIAA1191   | KIAA1191                                                     | 5  | 175773064 | 175788971 | 15908  | 0.5299    |
| KIF11      | kinesin family member 11                                     | 10 | 94353043  | 94415150  | 62108  | 0.1978478 |
| KIF1A      | kinesin family member 1A                                     | 2  | 241653181 | 241759725 | 106545 | 0.5962652 |
| KIF7       | kinesin family member 7                                      | 15 | 90152020  | 90198682  | 46663  | 0.5753199 |
| KRTAP5-AS1 | KRTAP5-1/KRTAP5-2 antisense RNA 1                            | 11 | 1592583   | 1620414   | 27832  | 0.7673512 |
| L1CAM      | L1 cell adhesion molecule                                    | X  | 153126969 | 153174677 | 47709  | 0.6237213 |
| LDLRAD2    | low density lipoprotein receptor class A domain containing 2 | 1  | 22138758  | 22151714  | 12957  | 0.5781296 |
| LIMCH1     | LIM and calponin homology domains 1                          | 4  | 41361624  | 41702061  | 340438 | 1.1705494 |
| LIMS2      | LIM zinc finger domain containing 2                          | 2  | 128395956 | 128439360 | 43405  | 0.644462  |
| LINC00955  | long intergenic non-protein coding RNA 955                   | 4  | 3578596   | 3592438   | 13843  | 1.1705494 |
| LINC01284  | long intergenic non-protein coding RNA 1284                  | X  | 50844121  | 50844465  | 345    | 0.58026   |
| LINC01411  | long intergenic non-protein coding RNA 1411                  | 5  | 173953231 | 173954142 | 912    | 0.1368968 |
| LINC01568  | long intergenic non-protein coding RNA 1568                  | 16 | 73420704  | 73455295  | 34592  | 0.5259785 |
| LINC01572  | long intergenic non-protein coding RNA 1572                  | 16 | 72302913  | 72324506  | 21594  | 0.5259785 |
| LMF1       | lipase maturation factor 1                                   | 16 | 903634    | 1031318   | 127685 | 0.6570818 |
| LMNA       | lamin A/C                                                    | 1  | 156052364 | 156109880 | 57517  | 0.6092605 |
| LMX1A      | LIM homeobox transcription factor 1 alpha                    | 1  | 165171104 | 165325952 | 154849 | 0.5950276 |
| LMX1B      | LIM homeobox transcription factor 1 beta                     | 9  | 129376722 | 129463311 | 86590  | 0.7284717 |
| LOX        | lysyl oxidase                                                | 5  | 121398890 | 121413980 | 15091  | 0.7595988 |
| LRP1       | LDL receptor related protein 1                               | 12 | 57522276  | 57607134  | 84859  | 0.6543884 |
| LRPAP1     | LDL receptor related protein associated protein 1            | 4  | 3508103   | 3534286   | 26184  | 0.5575473 |
| LYAR       | Ly1 antibody reactive                                        | 4  | 4269428   | 4291896   | 22469  | 0.5575473 |
| MAN1B1     | mannosidase alpha class 1B member 1                          | 9  | 139981379 | 140003635 | 22257  | 0.694392  |
| MAPK8IP1   | mitogen-activated protein kinase 8 interacting protein 1     | 11 | 45907202  | 45928016  | 20815  | 0.7521324 |
| MECP2      | methyl-CpG binding protein 2                                 | X  | 153287024 | 153363212 | 76189  | 0.6237213 |
| MEFV       | MEFV, pyrin innate immunity regulator                        | 16 | 3292028   | 3306627   | 14600  | 0.551909  |
| MIR1-1HG   | MIR1-1 host gene                                             | 20 | 61147660  | 61167971  | 20312  | 0.565306  |
| MIR1268A   | microRNA 1268a                                               | 15 | 22513229  | 22513280  | 52     | 0.2710271 |
| MMEL1      | membrane metalloendopeptidase like 1                         | 1  | 2522078   | 2564481   | 42404  | 0.5861476 |
| MORN1      | MORN repeat containing 1                                     | 1  | 2252692   | 2323146   | 70455  | 0.1048694 |
| MPO        | myeloperoxidase                                              | 17 | 56347217  | 56358296  | 11080  | 0.6162667 |
| MVB12B     | multivesicular body subunit 12B                              | 9  | 129089128 | 129269320 | 180193 | 0.7145743 |
| MYH14      | myosin heavy chain 14                                        | 19 | 50691443  | 50813802  | 122360 | 0.6069893 |
| NAIP       | NLR family apoptosis inhibitory protein                      | 5  | 70264310  | 70320941  | 56632  | 0.1368968 |
| NAP1L4     | nucleosome assembly protein 1 like 4                         | 11 | 2965667   | 3013607   | 47941  | 0.589939  |
| NDUFA6     | NADH:ubiquinone oxidoreductase subunit A6                    | 22 | 42481529  | 42486959  | 5431   | 0.6372778 |
| NDUF57     | NADH:ubiquinone oxidoreductase core subunit S7               | 19 | 1383526   | 1395583   | 12058  | 0.7471475 |
| NELFE      | negative elongation factor complex member E                  | 6  | 31919864  | 31926887  | 7024   | 0.6273893 |
| NFKB1      | nuclear factor kappa B subunit 1                             | 4  | 103422486 | 103538459 | 115974 | 0.8441654 |
| NLGN4Y     | neuroligin 4, Y-linked                                       | Y  | 16634518  | 16957530  | 323013 | 0.902015  |
| NMRAL1     | NmrA like redox sensor 1                                     | 16 | 4511681   | 4545764   | 34084  | 0.551909  |
| NOP56      | NOP56 ribonucleoprotein                                      | 20 | 2632791   | 2639039   | 6249   | 0.4282188 |
| NOS2       | nitric oxide synthase 2                                      | 17 | 26083792  | 26127525  | 43734  | 0.5250283 |
| NOTCH4     | notch 4                                                      | 6  | 32162620  | 32191844  | 29225  | 0.6273893 |
| NPHP4      | nephrocystin 4                                               | 1  | 5922871   | 6052533   | 129663 | 0.5861476 |
| NR1H2      | nuclear receptor subfamily 1 group H member 2                | 19 | 50832910  | 50886239  | 53330  | 0.5744436 |
| NSD1       | nuclear receptor binding SET domain protein 1                | 5  | 176560026 | 176727216 | 167191 | 0.2475641 |
| NTRK1      | neurotrophic receptor tyrosine kinase 1                      | 1  | 156785432 | 156851642 | 66211  | 0.6092605 |
| NTRK2      | neurotrophic receptor tyrosine kinase 2                      | 9  | 87283466  | 87638505  | 355040 | 1.0474547 |
| NUDT1      | nudix hydrolase 1                                            | 7  | 2281857   | 2290781   | 8925   | 0.5919394 |
| PANK2      | pantothenate kinase 2                                        | 20 | 3869486   | 3907605   | 38120  | 0.9746154 |
| PCDH11Y    | protocadherin 11 Y-linked                                    | Y  | 4868267   | 5610265   | 741999 | 1.1085184 |
| PCGF3      | polycomb group ring finger 3                                 | 4  | 699537    | 764428    | 64892  | 0.5575473 |
| PCSK9      | proprotein convertase subtilisin/kexin type 9                | 1  | 55505221  | 55530525  | 25305  | 0.6525684 |
| PDXK       | pyridoxal kinase                                             | 21 | 45138975  | 45182188  | 43214  | 0.6119098 |
| PDYN       | prodynorphin                                                 | 20 | 1959403   | 1974732   | 15330  | 0.565306  |
| PEX10      | peroxisomal biogenesis factor 10                             | 1  | 2336236   | 2345236   | 9001   | 0.5861476 |
| PHOX2B     | paired like homeobox 2b                                      | 4  | 41746099  | 41750987  | 4889   | 1.1705494 |

|                 |                                                                                                                   |    |           |           |         |           |
|-----------------|-------------------------------------------------------------------------------------------------------------------|----|-----------|-----------|---------|-----------|
| PIGS            | phosphatidylinositol glycan anchor biosynthesis class 5                                                           | 17 | 26880401  | 26898890  | 18490   | 0.5112525 |
| PIK3R5          | phosphoinositide-3-kinase regulatory subunit 5                                                                    | 17 | 8782233   | 8869029   | 86797   | 0.6240758 |
| PINK1           | PTEN induced putative kinase 1                                                                                    | 1  | 20959948  | 20978004  | 18057   | 0.5884203 |
| PINK1-AS        | PINK1 antisense RNA polycystin 1, transient                                                                       | 1  | 20969150  | 20978686  | 9537    | 0.5884203 |
| PKD1            | receptor potential channel interacting                                                                            | 16 | 2138711   | 2185899   | 47189   | 0.5804946 |
| PLA2G6          | phospholipase A2 group VI                                                                                         | 22 | 38507502  | 38601697  | 94196   | 0.0873912 |
| PLAT            | plasminogen activator, tissue type                                                                                | 8  | 42032236  | 42065242  | 33007   | 0.5478177 |
| PLEC            | plectin                                                                                                           | 8  | 144989321 | 145050902 | 61582   | 0.5544203 |
| PLEKHG5         | plekstrin homology and RhoGEF domain containing G5                                                                | 1  | 6526152   | 6580121   | 53970   | 0.5861476 |
| PLXNA2          | plexin A2                                                                                                         | 1  | 208195587 | 208417665 | 222079  | 0.3842927 |
| PNKP            | polynucleotide kinase 3'-phosphatase                                                                              | 19 | 50364461  | 50371166  | 6706    | 0.6122093 |
| POLG            | DNA polymerase gamma, catalytic subunit                                                                           | 15 | 89859534  | 89878092  | 18559   | 0.5753199 |
| POLR2F          | RNA polymerase II subunit F                                                                                       | 22 | 38348614  | 38437922  | 89309   | 0.5478177 |
| PORCN           | porcupine homolog (Drosophila)                                                                                    | X  | 48367350  | 48379202  | 11853   | 0.58026   |
| PPP1R3F         | protein phosphatase 1 regulatory subunit 3F                                                                       | X  | 49126306  | 49157929  | 31624   | 0.58026   |
| PPP2R2C         | protein phosphatase 2 regulatory subunit Bgamma                                                                   | 4  | 6322305   | 6565327   | 243023  | 0.5575473 |
| PPP3CA          | protein phosphatase 3 catalytic subunit alpha                                                                     | 4  | 101944566 | 102269435 | 324870  | 0.8441654 |
| PRDM16          | PR/SET domain 16                                                                                                  | 1  | 2985732   | 3355185   | 369454  | 0.5861476 |
| PRKCZ           | protein kinase C zeta                                                                                             | 1  | 1981909   | 2116834   | 134926  | 0.6162667 |
| PRKY            | protein kinase, Y-linked, pseudogene                                                                              | Y  | 7142013   | 7249589   | 107577  | 1.1085184 |
| PROCA1          | protein interacting with cyclin A1                                                                                | 17 | 27030215  | 27038872  | 8658    | 0.5112525 |
| PRY             | PTPN13-like, Y-linked                                                                                             | Y  | 24636544  | 24660784  | 24241   | 0.9863595 |
| PSEN2           | presenilin 2                                                                                                      | 1  | 227057885 | 227083806 | 25922   | 0.627898  |
| PTTG1IP         | PTTG1 interacting protein ras-related C3 botulinum toxin substrate 2 (rho family, small GTP binding protein Rac2) | 21 | 46269500  | 46293752  | 24253   | 0.6119098 |
| RAC2            | ras-related C3 botulinum toxin substrate 2 (rho family, small GTP binding protein Rac2)                           | 22 | 37621301  | 37640488  | 19188   | 0.575554  |
| RANBP17         | RAN binding protein 17                                                                                            | 5  | 170288874 | 170727019 | 438146  | 0.5299    |
| RBFOX1          | RNA binding protein, fox-1 homolog 1                                                                              | 16 | 6069095   | 7763340   | 1694246 | 0.551909  |
| RBFOX3          | RNA binding protein, fox-1 homolog 3                                                                              | 17 | 77085427  | 77613550  | 528124  | 0.5112525 |
| RCC2            | regulator of chromosome condensation 2                                                                            | 1  | 17733256  | 17766220  | 32965   | 0.5884203 |
| REEP2           | receptor accessory protein 2                                                                                      | 5  | 137774706 | 137782658 | 7953    | 0.6014213 |
| RER1            | retention in endoplasmic reticulum sorting receptor 1                                                             | 1  | 2323267   | 2336883   | 13617   | 0.6162667 |
| RHCG            | Rh family C glycoprotein                                                                                          | 15 | 89998680  | 90039844  | 41165   | 0.5753199 |
| RNASEH2B-AS1    | RNASEH2B antisense RNA 1                                                                                          | 13 | 51450822  | 51484848  | 34027   | 0.6639247 |
| ROGDI           | rogdi homolog                                                                                                     | 16 | 4846969   | 4852951   | 5983    | 0.551909  |
| RRP8            | ribosomal RNA processing 8, methyltransferase, homolog (yeast)                                                    | 11 | 6616305   | 6624850   | 8546    | 0.589939  |
| RXRA            | retinoid X receptor alpha                                                                                         | 9  | 137208944 | 137332431 | 123488  | 0.694392  |
| RXRG            | retinoid X receptor gamma                                                                                         | 1  | 165370159 | 165414433 | 44275   | 0.5950276 |
| SARM1           | sterile alpha and TIR motif containing 1                                                                          | 17 | 26691378  | 26728065  | 36688   | 0.617968  |
| SBN02           | strawberry notch homolog 2                                                                                        | 19 | 1107636   | 1174282   | 66647   | 0.7471475 |
| SCARB1          | scavenger receptor class B member 1                                                                               | 12 | 125261402 | 125367214 | 105813  | 1.2428278 |
| SDK1            | sidekick cell adhesion molecule 1                                                                                 | 7  | 3341080   | 4308632   | 967553  | 0.5919394 |
| SEC16A          | SEC16 homolog A, endoplasmic reticulum export factor                                                              | 9  | 139334549 | 139372141 | 37593   | 0.694392  |
| SEPT9           | septin 9                                                                                                          | 17 | 75276651  | 75496678  | 220028  | 0.621791  |
| SERPINF2        | serpin family F member 2                                                                                          | 17 | 1646130   | 1658562   | 12433   | 0.7342318 |
| SETD3           | SET domain containing 3                                                                                           | 14 | 99864083  | 99947216  | 83134   | 0.5981354 |
| SH2D2A          | SH2 domain containing 2A                                                                                          | 1  | 156776035 | 156786654 | 10620   | 0.6092605 |
| SHROOM4         | shroom family member 4                                                                                            | X  | 50334647  | 50557302  | 222656  | 0.58026   |
| SLC25A22        | solute carrier family 25 member 22                                                                                | 11 | 790475    | 798316    | 7842    | 0.589939  |
| SLC35A2         | solute carrier family 35 member A2                                                                                | X  | 48760459  | 48769235  | 8777    | 0.58026   |
| SLC35C1         | solute carrier family 35 member C1                                                                                | 11 | 45825623  | 45834566  | 8944    | 0.609723  |
| SLC37A1         | solute carrier family 37 member 1                                                                                 | 21 | 43916118  | 44001550  | 85433   | 0.6119098 |
| SLC46A1         | solute carrier family 46 member 1                                                                                 | 17 | 26721661  | 26734215  | 12555   | 0.5250283 |
| SLIT3           | slit guidance ligand 3                                                                                            | 5  | 168088745 | 168728133 | 639389  | 0.8875385 |
| SNCAIP          | synuclein alpha interacting protein                                                                               | 5  | 121647049 | 121799914 | 152866  | 0.7595988 |
| SNCB            | synuclein beta                                                                                                    | 5  | 176047085 | 176057530 | 10446   | 0.5299    |
| SORCS2          | sortilin related VPS10 domain containing receptor 2                                                               | 4  | 7194265   | 7744554   | 550290  | 0.5575473 |
| SPAG5-AS1       | SPAG5 antisense RNA 1                                                                                             | 17 | 26925808  | 26944393  | 18586   | 0.5112525 |
| SPECC1L         | sperm antigen with calponin homology and coiled-coil domains 1 like                                               | 22 | 24666786  | 24813708  | 146923  | 0.7796157 |
| SPECC1L-ADORA2A | SPECC1L-ADORA2A readthrough (NMD candidate)                                                                       | 22 | 24666866  | 24838324  | 171459  | 0.7796157 |

|                |                                                                        |    |           |           |        |           |
|----------------|------------------------------------------------------------------------|----|-----------|-----------|--------|-----------|
| SPEN           | spen family transcriptional repressor                                  | 1  | 16174359  | 16266955  | 92597  | 0.4600978 |
| SREBF1         | sterol regulatory element binding transcription factor 1               | 17 | 17713713  | 17740325  | 26613  | 0.7216414 |
| <b>SS18L1</b>  | SS18L1, nBAF chromatin remodeling complex subunit                      | 20 | 60718822  | 60757540  | 38719  | 0.7820486 |
| SSX5           | SSX family member 5                                                    | X  | 48045656  | 48056199  | 10544  | 0.58026   |
| STIM1          | stromal interaction molecule 1                                         | 11 | 3875757   | 4114439   | 238683 | 0.589939  |
| STK11          | serine/threonine kinase 11                                             | 19 | 1189406   | 1228428   | 39023  | 0.7471475 |
| STK32B         | serine/threonine kinase 32B                                            | 4  | 5053169   | 5502725   | 449557 | 0.5575473 |
| STX18          | syntaxin 18                                                            | 4  | 4417469   | 4544073   | 126605 | 0.5575473 |
| SYN1           | synapsin 1                                                             | X  | 47431303  | 47479252  | 47950  | 0.58026   |
| <b>SYT9</b>    | synaptotagmin 9                                                        | 11 | 7260009   | 7490273   | 230265 | 0.589939  |
| TBC1D16        | TBC1 domain family member 16                                           | 17 | 77906142  | 78009647  | 103506 | 0.621791  |
| TBC1D24        | TBC1 domain family member 24                                           | 16 | 2525147   | 2555735   | 30589  | 0.551909  |
| TBL1Y          | transducin beta like 1, Y-linked                                       | Y  | 6778727   | 6959724   | 180998 | 1.1085184 |
| TGM6           | transglutaminase 6                                                     | 20 | 2361554   | 2413399   | 51846  | 0.565306  |
| TH             | tyrosine hydroxylase                                                   | 11 | 2185159   | 2193107   | 7949   | 0.589939  |
| <b>TIMP2</b>   | TIMP metalloproteinase inhibitor 2                                     | 17 | 76849059  | 76921469  | 72411  | 0.621791  |
| TMEM97         | transmembrane protein 97                                               | 17 | 26646121  | 26655707  | 9587   | 0.5250283 |
| TNRC6C         | trinucleotide repeat containing 6C                                     | 17 | 76000249  | 76104916  | 104668 | 0.621791  |
| TP73           | tumor protein p73                                                      | 1  | 3569084   | 3652765   | 83682  | 0.5861476 |
| TPP1           | tripeptidyl peptidase 1                                                | 11 | 6634000   | 6640692   | 6693   | 0.589939  |
| TRAF2          | TNF receptor associated factor 2                                       | 9  | 139776364 | 139821059 | 44696  | 0.694392  |
| TRAF4          | TNF receptor associated factor 4                                       | 17 | 27071002  | 27077974  | 6973   | 0.5112525 |
| TRAP1          | TNF receptor associated protein 1                                      | 16 | 3701640   | 3767598   | 65959  | 0.551909  |
| TRIM5          | tripartite motif containing 5                                          | 11 | 5684425   | 5959849   | 275425 | 0.589939  |
| TRMT44         | tRNA methyltransferase 44 homolog (S. cerevisiae)                      | 4  | 8437867   | 8495258   | 57392  | 0.5575473 |
| <b>TRPM7</b>   | transient receptor potential cation channel subfamily M member 7       | 15 | 50844670  | 50979012  | 134343 | 0.2710271 |
| TSC1           | tuberous sclerosis 1                                                   | 9  | 135766735 | 135820020 | 53286  | 0.75104   |
| TSC2           | tuberous sclerosis 2                                                   | 16 | 2097466   | 2138716   | 41251  | 0.5804946 |
| TSPEAR         | thrombospondin type laminin G domain and EAR repeats                   | 21 | 45917775  | 46131495  | 213721 | 0.6119098 |
| TTY10          | testis-specific transcript, Y-linked 10 (non-protein coding)           | Y  | 22627554  | 22681114  | 53561  | 0.923349  |
| TTY14          | testis-specific transcript, Y-linked 14 (non-protein coding)           | Y  | 21034387  | 21239302  | 204916 | 1.0052812 |
| UBASH3A        | ubiquitin associated and SH3 domain containing A                       | 21 | 43824008  | 43867791  | 43784  | 0.6119098 |
| <b>UBE2I</b>   | ubiquitin conjugating enzyme E2 I                                      | 16 | 1355548   | 1377019   | 21472  | 0.6549837 |
| UBR4           | ubiquitin protein ligase E3 component n-recogin 4                      | 1  | 19401000  | 19536770  | 135771 | 0.5043603 |
| UCHL1          | ubiquitin C-terminal hydrolase L1                                      | 4  | 41258430  | 41270472  | 12043  | 0.9882033 |
| UIMC1          | ubiquitin interaction motif containing 1                               | 5  | 176332006 | 176449634 | 117629 | 0.5299    |
| UNKL           | unkempt family like zinc finger                                        | 16 | 1413206   | 1464752   | 51547  | 0.5889578 |
| USP48          | ubiquitin specific peptidase 48                                        | 1  | 22004791  | 22110099  | 105309 | 0.5884203 |
| UTY            | ubiquitously transcribed tetratricopeptide repeat containing, Y-linked | Y  | 15360259  | 15592553  | 232295 | 0.902015  |
| <b>VCP</b>     | valosin containing protein                                             | 9  | 35056061  | 35073246  | 17186  | 1.1148755 |
| VWASB1         | von Willebrand factor A domain containing 5B1                          | 1  | 20617412  | 20681387  | 63976  | 0.5884203 |
| WDR13          | WD repeat domain 13                                                    | X  | 48448430  | 48463581  | 15152  | 0.58026   |
| WDR45          | WD repeat domain 45                                                    | X  | 48929385  | 48958108  | 28724  | 0.58026   |
| WFS1           | wolframin ER transmembrane glycoprotein                                | 4  | 6271576   | 6304992   | 33417  | 0.5575473 |
| WWC1           | WW and C2 domain containing 1                                          | 5  | 167718656 | 167899308 | 180653 | 0.5299    |
| YTHDF1         | YTH N6-methyladenosine RNA binding protein 1                           | 20 | 61826781  | 61847586  | 20806  | 0.6180608 |
| ZBTB46         | zinc finger and BTB domain containing 46                               | 20 | 62375019  | 62462597  | 87579  | 0.623586  |
| ZFX3           | zinc finger homeobox 3                                                 | 16 | 72816784  | 73093597  | 276814 | 0.5259785 |
| ZFYVE27        | zinc finger FYVE-type containing 27                                    | 10 | 99496878  | 99520664  | 23787  | 0.6028431 |
| ZNF182         | zinc finger protein 182                                                | X  | 47974851  | 48003978  | 29128  | 0.58026   |
| ZNF200         | zinc finger protein 200                                                | 16 | 3222325   | 3236221   | 13897  | 0.551909  |
| <b>ZNF512B</b> | zinc finger protein 512B                                               | 20 | 63956702  | 63969865  | 13164  | 0.623586  |
| ZNF597         | zinc finger protein 597                                                | 16 | 3432422   | 3443542   | 11121  | 0.551909  |
| ZNF721         | zinc finger protein 721                                                | 4  | 425815    | 499156    | 73342  | 0.540562  |

Supplementary Table 10. List of CNV-driven differentially expressed genes in SALS1 patients.

Genes with concordant changes in CNV and GE

| Region                    | Cytoband     | Size (bp) | Gene Symbol | Gene Name                                                                              | Gain/Loss | Gene expression |
|---------------------------|--------------|-----------|-------------|----------------------------------------------------------------------------------------|-----------|-----------------|
| chr1:17733251-17766250    | 1p36.13      | 31.81     | RCC2*       | regulator of chromosome condensation 2                                                 | Gain      | Up              |
| chr1:19197924-19229293    | 1p36.13      | 31.37     | ALDH4A1*    | aldehyde dehydrogenase 4 family, member A1                                             | Gain      | Up              |
| chr1:19401000-19536812    | 1p36.13      | 135.75    | UBR4*       | ubiquitin protein ligase E3 component n-recognin 4                                     | Gain      | Up              |
| chr1:208195587-208417665  | 1q32.2       | 222.08    | PLXNA2      | plexin A2                                                                              | Gain      | Up              |
| chr1:2985565-3355185      | 1p36.32      | 369.44    | PRDM16      | PR domain containing 16                                                                | Gain      | Up              |
| chr2:127805599-127864903  | 2q14.3       | 59.31     | BIN1*       | bridging integrator 1                                                                  | Gain      | Up              |
| chr2:20817564-20850867    | 2p24.1       | 33.30     | HS1BP3      | HCLS1 binding protein 3                                                                | Gain      | Up              |
| chr2:241653181-241759725  | 2q37.3       | 106.55    | KIF1A       | kinesin family member 1A                                                               | Gain      | Up              |
| chr4:41362802-41702061    | 4p13         | 161.87    | LIMCH1      | LIM and calponin homology domains 1                                                    | Gain      | Up              |
| chr6:152442819-152958534  | 6q25.1-q25.2 | 515.72    | SYNE1       | spectrin repeat containing, nuclear envelope 1                                         | Gain      | Up              |
| chr6:31919864-31926864    | 6p21.33      | 7.00      | NELFE       | negative elongation factor complex member E                                            | Gain      | Up              |
| chr6:32485151-32498006    | 6p21.32      | 12.85     | HLA-DRB5    | major histocompatibility complex, class II, DR beta 5                                  | Gain      | Up              |
| chr8:144661867-144679845  | 8q24.3       | 17.98     | EEF1D       | eukaryotic translation elongation factor 1 delta (guanine nucleotide exchange protein) | Gain      | Up              |
| chr15:42646545-42704515   | 15q15.1      | 52.82     | CAPN3       | calpain 3, (p94)                                                                       | Gain      | Up              |
| chr15:89631381-89745591   | 15q26.1      | 114.21    | ABHD2       | abhydrolase domain containing 2                                                        | Gain      | Up              |
| chr16:89984287-89987385   | 16q24.3      | 3.10      | MC1R        | melanocortin 1 receptor (alpha melanocyte stimulating hormone receptor)                | Gain      | Up              |
| chr16:89988417-90002505   | 16q24.3      | 12.82     | TUBB3       | tubulin, beta 3 class III                                                              | Gain      | Up              |
| chr17:76849059-76921472   | 17q25.3      | 72.41     | TIMP2       | TIMP metalloproteinase inhibitor 2                                                     | Gain      | Up              |
| chr17:77906142-78009657   | 17q25.3      | 103.52    | TBC1D16     | TBC1 domain family, member 16                                                          | Gain      | Up              |
| chr17:78075339-78093680   | 17q25.3      | 18.33     | GAA         | glucosidase, alpha; acid                                                               | Gain      | Up              |
| chr20:23608534-23618685   | 20p11.21     | 4.28      | CST3        | cystatin C                                                                             | Gain      | Up              |
| chrX:153287025-153363188  | Xq28         | 75.93     | MECP2       | methyl CpG binding protein 2 (Rett syndrome)                                           | Gain      | Up              |
| chrX:153672473-153679002  | Xq28         | 6.53      | FAM50A      | family with sequence similarity 50, member A                                           | Gain      | Up              |
| chrY:6778727-6959977      | Yp11.2       | 181.00    | TBL1Y       | transducin (beta)-like 1, Y-linked                                                     | Gain      | Up              |
| chr1:207669473-207815110: | 1q32.2       | 145.64    | CR1*        | complement component (3b/4b) receptor 1 (Knops blood group)                            | Loss      | Down            |
| chr1:47715811-47779819:   | 1p33         | 64.01     | STIL        | SCL/TAL1 interrupting locus                                                            | Loss      | Down            |
| chr2:32390910-32449181:   | 2p22.3       | 58.27     | SLC30A6     | solute carrier family 30 (zinc transporter), member 6                                  | Loss      | Down            |
| chr4:2627159-2734302:     | 4p16.3       | 136.48    | FAM193A*    | family with sequence similarity 193, member A                                          | Loss      | Down            |
| chr4:2939663-2965233:     | 4p16.3       | 25.46     | NOP14*      | NOP14 nucleolar protein                                                                | Loss      | Down            |
| chr4:84184972-84206067:   | 4q21.23      | 21.09     | COQ2        | coenzyme Q2 4-hydroxybenzoate polyprenyltransferase                                    | Loss      | Down            |
| chr5:72861568-72878984:   | 5q13.2       | 16.20     | UTP15       | UTP15, U3 small nucleolar ribonucleoprotein, homolog (S. cerevisiae)                   | Loss      | Down            |
| chr10:76584685-76792380:  | 10q22.2      | 206.21    | KAT6B       | K(lysine) acetyltransferase 6B                                                         | Loss      | Down            |
| chr14:92524896-92572965:  | 14q32.12     | 48.07     | ATXN3       | ataxin 3                                                                               | Loss      | Down            |
| chr15:41624892-41673248:  | 15q15.1      | 48.36     | NUSAP1      | nucleolar and spindle associated protein 1                                             | Loss      | Down            |
| chr22:41253085-41328823:  | 22q13.2      | 75.74     | XPNPEP3     | X-prolyl aminopeptidase (aminopeptidase P) 3, putative                                 | Loss      | Down            |

Genes with discordant changes in CNV and GE

| Region                    | Cytoband      | Size (bp) | Gene Symbol | Gene Name                                                              | Gain/Loss | Gene expression |
|---------------------------|---------------|-----------|-------------|------------------------------------------------------------------------|-----------|-----------------|
| chr1:20915444-20945400    | 1p36.12       | 29.96     | CDA*        | Cytidine Deaminase                                                     | Gain      | Down            |
| chr1:3569129-3652765      | 1p36.32       | 83.64     | TP73        | Tumor Protein P73                                                      | Gain      | Down            |
| chr5:37812779-37835929    | 5p13.2        | 23.15     | GDNF        | Glial Cell Derived Neurotrophic Factor                                 | Gain      | Down            |
| chr17:76000318-76104916   | 17q25.3       | 104.60    | TNRC6C      | Trinucleotide Repeat Containing 6C                                     | Gain      | Down            |
| chr20:62031567-62033370   | 20q13.33      | 1.80      | KCNQ2       | Potassium Voltage-Gated Channel Subfamily Q Member 2                   | Gain      | Down            |
| chr1:10270606-10441664    | 1p36.22       | 170.90    | KIF1B       | kinesin family member 1B                                               | Loss      | Up              |
| chr1:245912642-246670644  | 1q44          | 758.00    | SMYD3       | SET and MYND domain containing 3                                       | Loss      | Up              |
| chr1:44173204-44396837    | 1p34.1        | 223.63    | ST3GAL3     | ST3 beta-galactoside alpha-2,3-sialyltransferase 3                     | Loss      | Up              |
| chr1:46654353-46685977    | 1p34.1        | 31.63     | POMGNT1     | protein O-linked mannose N-acetylglucosaminyltransferase 1 (beta 1,2-) | Loss      | Up              |
| chr2:61108709-61171410    | 2p16.1        | 41.43     | REL         | v-rel avian reticuloendotheliosis viral oncogene homolog               | Loss      | Up              |
| chr4:1795039-1810599      | 4p16.3        | 15.56     | FGFR3       | fibroblast growth factor receptor 3                                    | Loss      | Up              |
| chr4:3315874-3441640      | 4p16.3        | 125.77    | RGS12*      | regulator of G-protein signaling 12                                    | Loss      | Up              |
| chr5:64064755-64314590    | 5q12.3        | 249.84    | CWC27       | CWC27 spliceosome-associated protein homolog (S. cerevisiae)           | Loss      | Up              |
| chr6:31782952-31785719    | 6p21.33       | 2.43      | HSPA1A*     | heat shock 70kDa protein 1A                                            | Loss      | Up              |
| chr6:31847536-31865464    | 6p21.33       | 17.93     | EHMT2       | euchromatic histone-lysine N-methyltransferase 2                       | Loss      | Up              |
| chr6:32485151-32498006    | 6p21.32       | 12.85     | HLA-DRB5    | major histocompatibility complex, class II, DR beta 5                  | Loss      | Up              |
| chr7:157129692-157210133  | 7q36.3        | 80.42     | DNAJB6      | DnaJ (Hsp40) homolog, subfamily B, member 6                            | Loss      | Up              |
| chr9:127997127-128003666  | 9q33.3        | 6.54      | HSPA5       | heat shock 70kDa protein 5 (glucose-regulated protein, 78kDa)          | Loss      | Up              |
| chr9:135136827-135232113  | 9q34.13       | 93.55     | SETX        | senataxin                                                              | Loss      | Up              |
| chr10:75910943-76469061   | 10q22.2       | 558.12    | ADK         | adenosine kinase                                                       | Loss      | Up              |
| chr14:104394776-104519004 | 14q32.33      | 124.19    | TDRD9       | tudor domain containing 9                                              | Loss      | Up              |
| chr14:73741858-73925288   | 14q24.2-q24.3 | 183.37    | NUMB        | numb homolog (Drosophila)                                              | Loss      | Up              |

|                         |                 |        |               |                                                                 |      |    |
|-------------------------|-----------------|--------|---------------|-----------------------------------------------------------------|------|----|
| chr14:92335755-92414046 | 14q32.12        | 78.29  | FBLN5         | fibulin 5                                                       | Loss | Up |
| chr15:41913432-42062141 | 15q15.1         | 109.53 | MGA           | MGA, MAX dimerization protein                                   | Loss | Up |
| chr15:64680003-64747502 | 15q22.31        | 67.50  | TRIP4         | thyroid hormone receptor interactor 4                           | Loss | Up |
| chr15:93442286-93571237 | 15q26.1         | 127.69 | CHD2          | chromodomain helicase DNA binding protein 2                     | Loss | Up |
| chr16:46693589-46723144 | 16q11.2         | 29.56  | VPS35         | vacuolar protein sorting 35 homolog (S. cerevisiae)             | Loss | Up |
| chr16:70514472-70557457 | 16q22.1         | 42.99  | COG4*         | component of oligomeric golgi complex 4                         | Loss | Up |
| chr17:15879874-15903006 | 17p12           | 23.13  | <b>ZSWIM7</b> | zinc finger, SWIM-type containing 7                             | Loss | Up |
| chr17:16945790-17095962 | 17p11.2         | 27.99  | MPRIP         | myosin phosphatase Rho interacting protein                      | Loss | Up |
| chr17:30190190-30228729 | 17q11.2         | 38.54  | UTP6          | UTP6, small subunit (SSU) processome component, homolog (yeast) | Loss | Up |
| chr20:32581458-32670991 | 20q11.22        | 89.53  | RALY          | RALY heterogeneous nuclear ribonucleoprotein                    | Loss | Up |
| chr20:33543704-33590240 | 20q11.22        | 46.54  | MYH7B         | myosin, heavy chain 7B, cardiac muscle, beta                    | Loss | Up |
| chr20:34359923-34538292 | 20q11.22-q11.23 | 178.37 | PHF20         | PHD finger protein 20                                           | Loss | Up |
| chr21:44473301-44496472 | 21q22.3         | 23.17  | CBS*          | cystathionine-beta-synthase                                     | Loss | Up |
| chrX:41192561-41209527  | Xp11.4          | 16.87  | DDX3X         | DEAD (Asp-Glu-Ala-Asp) box helicase 3, X-linked                 | Loss | Up |

\*CNV-encompassed genes selectively detected in SALS patients and not in control individuals.

Supplementary Table 11. List of CNV-driven differentially expressed genes in SALS2 patients.

| Genes with concordant changes in CNV and GE |                |           |             |                                                                                        |           |                 |
|---------------------------------------------|----------------|-----------|-------------|----------------------------------------------------------------------------------------|-----------|-----------------|
| Region                                      | Cytoband       | Size (bp) | Gene Symbol | Gene Name                                                                              | Gain/Loss | Gene expression |
| chr1:110276554-110283660                    | 1p13.3         | 7.107     | GSTM3*      | glutathione S-transferase mu 3 (brain)                                                 | Gain      | Up              |
| chr1:110453233-110473616                    | 1p13.3         | 20.384    | CSF1*       | colony stimulating factor 1 (macrophage)                                               | Gain      | Up              |
| chr1:165370159-165414592                    | 1q23.3         | 44.434    | RXRG*       | retinoid X receptor, gamma                                                             | Gain      | Up              |
| chr1:205012340-205047173                    | 1q32.1         | 34.832    | CNTN2       | contactin 2 (axonal)                                                                   | Gain      | Up              |
| chr1:21835475-21904905                      | 1p36.12        | 69.048    | ALPL*       | alkaline phosphatase, liver/bone/kidney                                                | Gain      | Up              |
| chr1:22004791-22109688                      | 1p36.12        | 104.897   | USP48*      | ubiquitin specific peptidase 48                                                        | Gain      | Up              |
| chr1:22148737-22263750                      | 1p36.12        | 115.014   | HSPG2*      | heparan sulfate proteoglycan 2                                                         | Gain      | Up              |
| chr1:2251719-2323190                        | 1p36.33-p36.32 | 70.298    | MORN1       | MORN repeat containing 1                                                               | Gain      | Up              |
| chr1:3728645-3773797                        | 1p36.32        | 45.153    | CEP104      | centrosomal protein 104kDa                                                             | Gain      | Up              |
| chr3:128198265-128212030                    | 3q21.3         | 13.766    | GATA2       | GATA binding protein 2                                                                 | Gain      | Up              |
| chr4:3505324-3534224                        | 4p16.3         | 28.901    | LRPAP1      | low density lipoprotein receptor-related protein associated protein 1                  | Gain      | Up              |
| chr4:41746099-41750987                      | 4p13           | 4.889     | PHOX2B      | paired-like homeobox 2b                                                                | Gain      | Up              |
| chr4:5053527-5502728                        | 4p16.2         | 449.199   | STK32B      | serine/threonine kinase 32B                                                            | Gain      | Up              |
| chr4:5822491-5894785                        | 4p16.2         | 72.295    | CRMP1       | collapsin response mediator protein 1                                                  | Gain      | Up              |
| chr4:843065-926174                          | 4p16.3         | 83.11     | GAK         | cyclin G associated kinase                                                             | Gain      | Up              |
| chr4:8442532-8478282                        | 4p16.1         | 38.729    | TRMT44      | tRNA methyltransferase 44 homolog (S. cerevisiae)                                      | Gain      | Up              |
| chr5:121647455-121799794                    | 5q23.2         | 151.975   | SNCAIP      | synuclein, alpha interacting protein                                                   | Gain      | Up              |
| chr5:169064251-169510386                    | 5q35.1         | 446.136   | DOCK2       | dedicator of cytokinesis 2                                                             | Gain      | Up              |
| chr5:176560026-176727214                    | 5q35.2-q35.3   | 166.382   | NSD1        | nuclear receptor binding SET domain protein 1                                          | Gain      | Up              |
| chr5:37812779-37839782                      | 5p13.2         | 23.151    | GDNF        | glial cell derived neurotrophic factor                                                 | Gain      | Up              |
| chr7:2767739-2883963                        | 7p22.3-p22.2   | 116.219   | GNA12       | guanine nucleotide binding protein (G protein) alpha 12                                | Gain      | Up              |
| chr7:3341080-4308632                        | 7p22.2         | 967.552   | SDK1        | sidekick cell adhesion molecule 1                                                      | Gain      | Up              |
| chr8:144635383-144645232                    | 8q24.3         | 4.755     | GSDMD       | gasdermin D                                                                            | Gain      | Up              |
| chr8:144661867-144679845                    | 8q24.3         | 17.979    | EEF1D       | eukaryotic translation elongation factor 1 delta (guanine nucleotide exchange protein) | Gain      | Up              |
| chr8:144989321-145050913                    | 8q24.3         | 35.724    | PLEC        | plectin                                                                                | Gain      | Up              |
| chr9:116148592-116163618                    | 9q32           | 15.027    | ALAD        | aminolevulinic acid dehydratase                                                        | Gain      | Up              |
| chr9:129089123-129269320                    | 9q33.3         | 180.198   | MVB12B      | multivesicular body subunit 12B                                                        | Gain      | Up              |
| chr9:139776341-139821853                    | 9q34.3         | 40.103    | TRAF2*      | TNF receptor-associated factor 2                                                       | Gain      | Up              |
| chr9:139901686-139923374                    | 9q34.3         | 21.06     | ABCA2*      | ATP-binding cassette, sub-family A (ABC1), member 2                                    | Gain      | Up              |
| chr9:139981379-140003639                    | 9q34.3         | 22.261    | MAN1B1*     | mannosidase, alpha, class 1B, member 1                                                 | Gain      | Up              |
| chr10:94352825-94415152                     | 10q23.33       | 62.328    | KIF11       | kinesin family member 11                                                               | Gain      | Up              |
| chr11:2965660-3013607                       | 11p15.4        | 47.948    | NAP1L4      | nucleosome assembly protein 1-like 4                                                   | Gain      | Up              |
| chr11:46740743-46761056                     | 11p11.2        | 20.314    | F2          | coagulation factor II (thrombin)                                                       | Gain      | Up              |
| chr11:5676740-5706339                       | 11p15.4        | 21.915    | TRIM5       | tripartite motif containing 5                                                          | Gain      | Up              |
| chr12:57522282-57607142                     | 12q13.3        | 84.844    | LRP1        | low density lipoprotein receptor-related protein 1                                     | Gain      | Up              |
| chr14:105235686-105262080                   | 14q32.33       | 26.394    | AKT1        | v-akt murine thymoma viral oncogene homolog 1                                          | Gain      | Up              |
| chr14:99864083-99947228                     | 14q32.2        | 83.144    | SETD3       | SET domain containing 3                                                                | Gain      | Up              |
| chr16:1413206-1464750                       | 16p13.3        | 51.5      | UNKL        | unemph homolog (Drosophila)-like                                                       | Gain      | Up              |
| chr16:2138709-2185899                       | 16p13.3        | 47.189    | PKD1        | polycystic kidney disease 1 (autosomal dominant)                                       | Gain      | Up              |
| chr16:3775055-3930121                       | 16p13.3        | 155.066   | CREBBP      | CREB binding protein                                                                   | Gain      | Up              |
| chr16:4012650-4166186                       | 16p13.3        | 153.537   | ADCY9       | adenylate cyclase 9                                                                    | Gain      | Up              |
| chr17:26721661-26733230                     | 17q11.2        | 11.57     | SLC46A1     | solute carrier family 46 (folate transporter), member 1                                | Gain      | Up              |
| chr17:75277492-75496678                     | 17q25.2-q25.3  | 219.187   | SEPT9       | septin 9                                                                               | Gain      | Up              |
| chr19:1107633-1174282                       | 19p13.3        | 66.65     | SBNO2       | strawberry notch homolog 2 (Drosophila)                                                | Gain      | Up              |
| chr19:1205798-1228434                       | 19p13.3        | 22.637    | STK11       | serine/threonine kinase 11                                                             | Gain      | Up              |
| chr20:1959402-1974931                       | 20p13          | 14.993    | PDYN        | prodynorphin                                                                           | Gain      | Up              |
| chr20:3869486-3904538                       | 20p13          | 34.761    | PANK2       | pantothenate kinase 2                                                                  | Gain      | Up              |
| chr20:61509090-61569304                     | 20q13.33       | 48.814    | DIDO1       | death inducer-obliterator 1                                                            | Gain      | Up              |
| chr20:61974662-62009487                     | 20q13.33       | 18.087    | CHRNA4      | cholinergic receptor, nicotinic, alpha 4 (neuronal)                                    | Gain      | Up              |
| chr21:43919742-44001550                     | 21q22.3        | 81.809    | SLC37A1     | solute carrier family 37 (glucose-6-phosphate transporter), member 1                   | Gain      | Up              |
| chr21:44473301-44496472                     | 21q22.3        | 23.172    | CBS*        | cystathionine-beta-synthase                                                            | Gain      | Up              |
| chr21:46494493-46646478                     | 21q22.3        | 151.986   | ADARB1      | adenosine deaminase, RNA-specific, B1                                                  | Gain      | Up              |
| chrX:153126969-153151628                    | Xq28           | 24.66     | L1CAM       | L1 cell adhesion molecule                                                              | Gain      | Up              |
| chr1:174128552-174964445                    | 1q25.1         | 798.776   | RABGAP1L*   | RAB GTPase activating protein 1-like                                                   | Loss      | Down            |
| chr1:176826441-177134024                    | 1q25.2         | 303.822   | ASTN1       | astrotactin 1                                                                          | Loss      | Down            |
| chr1:178062864-178448649                    | 1q25.2         | 385.785   | RASAL2      | RAS protein activator like 2                                                           | Loss      | Down            |
| chr1:179262849-179327815                    | 1q25.2         | 64.966    | SOAT1       | sterol O-acyltransferase 1                                                             | Loss      | Down            |
| chr1:205681947-205719372                    | 1q32.1         | 37.426    | NUCKS1      | nuclear casein kinase and cyclin-dependent kinase substrate 1                          | Loss      | Down            |
| chr1:207669473-207815110                    | 1q32.2         | 145.638   | CR1*        | complement component (3b/4b) receptor 1 (Knops blood group)                            | Loss      | Down            |
| chr1:47023079-47069966                      | 1p33           | 46.888    | MKKN1       | MAP kinase interacting serine/threonine kinase 1                                       | Loss      | Down            |
| chr2:222282747-222437010                    | 2q36.1         | 154.264   | EPHA4       | EPH receptor A4                                                                        | Loss      | Down            |
| chr2:32288660-32382706                      | 2p22.3         | 94.027    | SPAST       | spastin                                                                                | Loss      | Down            |
| chr3:155838337-156256927                    | 3q25.31        | 418.591   | KCNAB1*     | potassium voltage-gated channel, shaker-related subfamily, beta member 1               | Loss      | Down            |
| chr3:156392205-156424559                    | 3q25.31        | 30.105    | TIPARP*     | TCDD-inducible poly(ADP-ribose) polymerase                                             | Loss      | Down            |
| chr4:2271324-2420370                        | 4p16.3         | 149.047   | ZFYVE28*    | zinc finger, FYVE domain containing 28                                                 | Loss      | Down            |
| chr4:3076408-3245687                        | 4p16.3         | 169.28    | HTT         | huntingtin                                                                             | Loss      | Down            |
| chr4:84184972-84206067                      | 4q21.23        | 21.091    | COQ2        | coenzyme Q2 4-hydroxybenzoate polyprenyltransferase                                    | Loss      | Down            |
| chr5:70220768-70248839                      | 5q13.2         | 27.184    | SMN1        | survival of motor neuron 1, telomeric                                                  | Loss      | Down            |

|                           |               |         |          |                                                                                          |      |      |
|---------------------------|---------------|---------|----------|------------------------------------------------------------------------------------------|------|------|
| chr6:74303102-74363737    | 6q13          | 60.636  | SLC17A5* | solute carrier family 17 (acidic sugar transporter), member 5                            | Loss | Down |
| chr6:74405508-74538041    | 6q13          | 132.534 | CD109    | CD109 molecule                                                                           | Loss | Down |
| chr6:76004607-76203516    | 6q14.1        | 185.697 | FILIP1   | filamin A interacting protein 1                                                          | Loss | Down |
| chr6:76458893-76629254    | 6q14.1        | 170.346 | MYO6     | myosin VI                                                                                | Loss | Down |
| chr7:22766766-22771621    | 7p15.3        | 4.856   | IL6      | interleukin 6 (interferon, beta 2)                                                       | Loss | Down |
| chr7:22980878-23053814    | 7p15.3        | 72.893  | FAM126A  | family with sequence similarity 126, member A                                            | Loss | Down |
| chr8:38088861-38120351    | 8p11.23       | 30.817  | DDHD2    | DDHD domain containing 2                                                                 | Loss | Down |
| chr8:38127217-38239872    | 8p11.23       | 107.23  | WHSC1L1  | Wolf-Hirschhorn syndrome candidate 1-like 1                                              | Loss | Down |
| chr9:127704887-127905838  | 9q33.3        | 200.951 | SCAI     | suppressor of cancer cell invasion                                                       | Loss | Down |
| chr9:127997127-128003666  | 9q33.3        | 6.54    | HSPA5    | heat shock 70kDa protein 5 (glucose-regulated protein, 78kDa)                            | Loss | Down |
| chr9:135136827-135232113  | 9q34.13       | 93.546  | SETX     | senataxin                                                                                | Loss | Down |
| chr12:111890018-112037480 | 12q24.12      | 147.463 | ATXN2    | ataxin 2                                                                                 | Loss | Down |
| chr12:32552518-32798984   | 12p11.21      | 143.944 | FGD4     | FYVE, RhoGEF and PH domain containing 4                                                  | Loss | Down |
| chr12:50898768-51142450   | 12q13.12      | 243.683 | DIP2B    | DIP2 disco-interacting protein 2 homolog B (Drosophila)                                  | Loss | Down |
| chr12:51373566-51422118   | 12q13.12      | 42.284  | SLC11A2  | solute carrier family 11 (proton-coupled divalent metal ion transporter), member 2       | Loss | Down |
| chr12:51442082-51454207   | 12q13.12      | 12.126  | LETMD1   | LETM1 domain containing 1                                                                | Loss | Down |
| chr12:64173583-64203338   | 12q14.2       | 29.756  | TMEM5    | transmembrane protein 5                                                                  | Loss | Down |
| chr12:64845840-64895899   | 12q14.2       | 50.06   | TBK1     | TANK-binding kinase 1                                                                    | Loss | Down |
| chr14:50583846-50698596   | 14q21.3       | 114.254 | SOS2     | son of sevenless homolog 2 (Drosophila)                                                  | Loss | Down |
| chr14:92335755-92414046   | 14q32.12      | 78.292  | FBLN5    | fibulin 5                                                                                | Loss | Down |
| chr15:41523341-41574085   | 15q15.1       | 50.647  | CHP1     | calcineurin-like EF-hand protein 1                                                       | Loss | Down |
| chr15:41679547-41694658   | 15q15.1       | 15.112  | NDUFA1   | NADH dehydrogenase (ubiquinone) complex I, assembly factor 1                             | Loss | Down |
| chr15:44854894-44955876   | 15q21.1       | 100.983 | SPG11    | spastic paraplegia 11 (autosomal recessive)                                              | Loss | Down |
| chr15:51200780-51298097   | 15q21.2       | 97.229  | AP4E1    | adaptor-related protein complex 4, epsilon 1 subunit                                     | Loss | Down |
| chr15:65255363-65282251   | 15q22.31      | 26.889  | SPG21    | spastic paraplegia 21 (autosomal recessive, Mast syndrome)                               | Loss | Down |
| chr15:78832747-78841562   | 15q25.1       | 8.817   | PSMA4    | proteasome (prosome, macropain) subunit, alpha type, 4                                   | Loss | Down |
| chr16:46693589-46723144   | 16q11.2       | 29.556  | VPS35    | vacuolar protein sorting 35 homolog (S. cerevisiae)                                      | Loss | Down |
| chr17:19674143-19771239   | 17p11.2       | 97.097  | ULK2     | unc-51 like autophagy activating kinase 2                                                | Loss | Down |
| chr17:2496923-2588909     | 17p13.3       | 91.987  | PAFAH1B1 | platelet-activating factor acetylhydrolase 1b, regulatory subunit 1 (45kDa)              | Loss | Down |
| chr17:29109702-29151778   | 17q11.2       | 42.077  | CRLF3    | cytokine receptor-like factor 3                                                          | Loss | Down |
| chr17:29421945-29704695   | 17q11.2       | 282.751 | NF1      | neurofibromin 1                                                                          | Loss | Down |
| chr17:30264044-30328057   | 17q11.2       | 64.014  | SUZ12    | SUZ12 polycomb repressive complex 2 subunit                                              | Loss | Down |
| chr17:34136459-34174246   | 17q12         | 37.788  | TAF15    | TAF15 RNA polymerase II, TATA box binding protein (TBP)-associated factor, 68kDa         | Loss | Down |
| chr17:3617919-3704537     | 17p13.2       | 86.619  | ITGAE    | integrin, alpha E (antigen CD103, human mucosal lymphocyte antigen 1; alpha polypeptide) | Loss | Down |
| chr18:9102628-9134343     | 18p11.22      | 31.716  | NDUFV2   | NADH dehydrogenase (ubiquinone) flavoprotein 2, 24kDa                                    | Loss | Down |
| chr20:34256610-34287287   | 20q11.22      | 30.678  | NFS1     | NFS1 cysteine desulfurase                                                                | Loss | Down |
| chr20:34679426-34820721   | 20q11.23      | 78.06   | EPB41L1  | erythrocyte membrane protein band 4.1-like 1                                             | Loss | Down |
| chr20:34995444-35157040   | 20q11.23      | 161.593 | DLGAP4   | discs, large (Drosophila) homolog-associated protein 4                                   | Loss | Down |
| chr20:43595120-43708600   | 20q13.12      | 113.474 | STK4     | serine/threonine kinase 4                                                                | Loss | Down |
| chr20:44637547-44645200   | 20q13.12      | 7.654   | MMP9     | matrix metalloproteinase 9 (gelatinase B, 92kDa gelatinase, 92kDa type IV collagenase)   | Loss | Down |
| chr22:32149937-32303020   | 22q12.2-q12-3 | 153.012 | DEPDC5   | DEP domain containing 5                                                                  | Loss | Down |
| chr22:41253085-41328823   | 22q13.2       | 75.739  | XPNPEP3  | X-prolyl aminopeptidase (aminopeptidase P) 3, putative                                   | Loss | Down |
| chr22:42229083-42303312   | 22q13.2       | 73.27   | SREBF2   | sterol regulatory element binding transcription factor 2                                 | Loss | Down |
| chrX:119658444-119709684  | Xq24          | 51.239  | CUL4B*   | cullin 4B                                                                                | Loss | Down |

### Genes with discordant changes in CNV and GE

| Region                   | Cytoband       | Size (bp) | Gene Symbol | Gene Name                                                                              | Gain/Loss | Gene expression |
|--------------------------|----------------|-----------|-------------|----------------------------------------------------------------------------------------|-----------|-----------------|
| chr1:1981909-2116834     | 1p36.33        | 134.93    | PRKCZ       | protein kinase C, zeta                                                                 | Gain      | Down            |
| chr1:2323214-2336883     | 1p36.32        | 13.672    | RER1        | RER1 retention in endoplasmic reticulum 1 homolog (S. cerevisiae)                      | Gain      | Down            |
| chr1:3728645-3773797     | 1p36.32        | 45.153    | CEP104      | centrosomal protein 104kDa                                                             | Gain      | Down            |
| chr1:5922870-6052618     | 1p36.31        | 129.664   | NPHP4       | nephronophthisis 4                                                                     | Gain      | Down            |
| chr1:6526152-6580121     | 1p36.31        | 19.378    | PLEKHG5     | pleckstrin homology domain containing, family G (with RhoGef domain) member 5          | Gain      | Down            |
| chr1:16174359-16266951   | 1p36.21-p36.13 | 92.592    | SPEN        | spen homolog, transcriptional regulator (Drosophila)                                   | Gain      | Down            |
| chr1:17733251-17766250   | 1p36.13        | 31.809    | RCC2*       | regulator of chromosome condensation 2                                                 | Gain      | Down            |
| chr1:18434240-18704977   | 1p36.13        | 270.738   | IGSF21*     | immunoglobulin superfamily, member 21                                                  | Gain      | Down            |
| chr1:20959948-20978004   | 1p36.12        | 18.057    | PINK1*      | PTEN induced putative kinase 1                                                         | Gain      | Down            |
| chr1:20978260-20988037   | 1p36.12        | 9.778     | DDOST*      | dolichyl-diphosphooligosaccharide--protein glycosyltransferase subunit (non-catalytic) | Gain      | Down            |
| chr1:21132785-21503381   | 1p36.12        | 370.597   | EIF4G3*     | eukaryotic translation initiation factor 4 gamma, 3                                    | Gain      | Down            |
| chr1:22004791-22109688   | 1p36.12        | 104.897   | USP48*      | ubiquitin specific peptidase 48                                                        | Gain      | Down            |
| chr1:55315300-55352921   | 1p32.3         | 37.622    | DHCR24      | 24-dehydrocholesterol reductase                                                        | Gain      | Down            |
| chr1:110276554-110283660 | 1p13.3         | 7.107     | GSTM3*      | glutathione S-transferase mu 3 (brain)                                                 | Gain      | Down            |
| chr1:156776035-156786640 | 1q23.1         | 10.606    | SH2D2A      | SH2 domain containing 2A                                                               | Gain      | Down            |
| chr1:205012340-205047173 | 1q32.1         | 34.832    | CNTN2       | contactin 2 (axonal)                                                                   | Gain      | Down            |
| chr1:226819391-226927028 | 1q42.12        | 107.486   | ITPKB       | inositol-trisphosphate 3-kinase B                                                      | Gain      | Down            |



|                           |              |         |               |                                                                                        |      |      |
|---------------------------|--------------|---------|---------------|----------------------------------------------------------------------------------------|------|------|
| chr1:227057885-227083804  | 1q42.13      | 25.532  | PSEN2         | presenilin 2 (Alzheimer disease 4)                                                     | Gain | Down |
| chr2:74588281-74619214    | 2p13.1       | 19.202  | <b>DCTN1</b>  | dynactin 1                                                                             | Gain | Down |
| chr2:127805599-127864903  | 2q14.3       | 59.305  | BIN1*         | bridging integrator 1                                                                  | Gain | Down |
| chr2:171673200-171717661  | 2q31.1       | 44.46   | GAD1          | glutamate decarboxylase 1 (brain, 67kDa)                                               | Gain | Down |
| chr2:241653181-241759725  | 2q37.3       | 106.545 | KIF1A         | kinesin family member 1A                                                               | Gain | Down |
| chr4:433773-492960        | 4p16.3       | 59.188  | ZNF721        | zinc finger protein 721                                                                | Gain | Down |
| chr4:695537-764428        | 4p16.3       | 64.855  | PCGF3         | polycomb group ring finger 3                                                           | Gain | Down |
| chr4:3505324-3534224      | 4p16.3       | 28.901  | LRPAP1        | low density lipoprotein receptor-related protein associated protein 1                  | Gain | Down |
| chr4:5822491-5894785      | 4p16.2       | 72.295  | CRMP1         | collapsin response mediator protein 1                                                  | Gain | Down |
| chr4:6322305-6565327      | 4p16.1       | 61.293  | PPP2R2C       | protein phosphatase 2, regulatory subunit B, gamma                                     | Gain | Down |
| chr4:6784459-6885899      | 4p16.1       | 101.441 | KIAA0232      | KIAA0232                                                                               | Gain | Down |
| chr4:7967037-8160559      | 4p16.1       | 193.523 | ABLIM2        | actin binding LIM protein family, member 2                                             | Gain | Down |
| chr4:8442532-8478282      | 4p16.1       | 38.729  | TRMT44        | tRNA methyltransferase 44 homolog (S. cerevisiae)                                      | Gain | Down |
| chr4:40812044-41218731    | 4p14-p13     | 404.592 | APBB2         | amyloid beta (A4) precursor protein-binding, family B, member 2                        | Gain | Down |
| chr4:41258898-41270446    | 4p13         | 11.549  | UCHL1         | ubiquitin carboxyl-terminal esterase L1 (ubiquitin thiolesterase)                      | Gain | Down |
| chr4:41362802-41702061    | 4p13         | 161.871 | LIMCH1        | LIM and calponin homology domains 1                                                    | Gain | Down |
| chr4:101944587-102268655  | 4q24         | 324.042 | <b>PPP3CA</b> | protein phosphatase 3, catalytic subunit, alpha isozyme                                | Gain | Down |
| chr4:102711764-102995969  | 4q24         | 284.206 | BANK1         | B-cell scaffold protein with ankyrin repeats 1                                         | Gain | Down |
| chr4:103422486-103538459  | 4q24         | 115.974 | NFKB1         | nuclear factor of kappa light polypeptide gene enhancer in B-cells 1                   | Gain | Down |
| chr5:137774690-137782658  | 5q31.2       | 7.969   | REEP2         | receptor accessory protein 2                                                           | Gain | Down |
| chr5:167719065-167899308  | 5q34         | 180.244 | WWC1          | WW and C2 domain containing 1                                                          | Gain | Down |
| chr5:168088738-168728133  | 5q34-q35.1   | 639.396 | SLIT3         | slit homolog 3 (Drosophila)                                                            | Gain | Down |
| chr5:171288553-171433877  | 5q35.1       | 145.322 | FBXW11        | F-box and WD repeat domain containing 11                                               | Gain | Down |
| chr5:173315331-173387313  | 5q35.2       | 71.983  | CPEB4         | cytoplasmic polyadenylation element binding protein 4                                  | Gain | Down |
| chr5:175773065-175788809  | 5q35.2       | 15.744  | KIAA1191      | KIAA1191                                                                               | Gain | Down |
| chr5:176047210-176057557  | 5q35.2       | 10.348  | SNCB          | synuclein, beta                                                                        | Gain | Down |
| chr5:176332006-176433795  | 5q35.2       | 101.79  | UIMC1         | ubiquitin interaction motif containing 1                                               | Gain | Down |
| chr5:176560026-176727214  | 5q35.2-q35.3 | 166.382 | NSD1          | nuclear receptor binding SET domain protein 1                                          | Gain | Down |
| chr5:176853687-176869850  | 5q35.3       | 16.164  | GRK6          | G protein-coupled receptor kinase 6                                                    | Gain | Down |
| chr6:31919864-31926864    | 6p21.33      | 7.001   | NELFE         | negative elongation factor complex member E                                            | Gain | Down |
| chr6:32148745-32152099    | 6p21.32      | 3.355   | AGER          | advanced glycosylation end product-specific receptor                                   | Gain | Down |
| chr6:32158543-32163300    | 6p21.32      | 4.758   | GPSM3         | G-protein signaling modulator 3                                                        | Gain | Down |
| chr6:32162620-32191844    | 6p21.32      | 29.225  | NOTCH4        | notch 4                                                                                | Gain | Down |
| chr7:2281857-2290780      | 7p22.3       | 8.924   | NUDT1         | nudix (nucleoside diphosphate linked moiety X)-type motif 1                            | Gain | Down |
| chr8:42032236-42065242    | 8p11.21      | 32.959  | PLAT          | plasminogen activator, tissue                                                          | Gain | Down |
| chr8:144661867-144679845  | 8q24.3       | 17.979  | <b>EEF1D</b>  | eukaryotic translation elongation factor 1 delta (guanine nucleotide exchange protein) | Gain | Down |
| chr9:35056065-35072739    | 9p13.3       | 16.675  | <b>VCP</b>    | valosin containing protein                                                             | Gain | Down |
| chr9:87283417-87641985    | 9p21.33      | 355.04  | NTRK2         | neurotrophic tyrosine kinase, receptor, type 2                                         | Gain | Down |
| chr9:137218316-137332431  | 9q34.2       | 89.297  | RXRA*         | retinoid X receptor, alpha                                                             | Gain | Down |
| chr9:139756566-139760788  | 9q34.3       | 4.168   | EDF1*         | endothelial differentiation-related factor 1                                           | Gain | Down |
| chr9:140033609-140063214  | 9q34.3       | 29.606  | GRIN1*        | glutamate receptor, ionotropic, N-methyl D-aspartate 1                                 | Gain | Down |
| chr10:99496878-99520664   | 10q24.2      | 23.787  | ZFYVE27       | zinc finger, FYVE domain containing 27                                                 | Gain | Down |
| chr11:637305-640706       | 11p15.5      | 3.401   | <b>DRD4</b>   | dopamine receptor D4                                                                   | Gain | Down |
| chr11:644225-695740       | 11p15.5      | 51.516  | <b>DEAF1</b>  | DEAF1 transcription factor                                                             | Gain | Down |
| chr11:790475-798269       | 11p15.5      | 7.795   | SLC25A22      | solute carrier family 25 (mitochondrial carrier: glutamate), member 22                 | Gain | Down |
| chr11:925809-1012245      | 11p15.5      | 86.437  | AP2A2         | adaptor-related protein complex 2, alpha 2 subunit                                     | Gain | Down |
| chr11:2150346-2179611     | 11p15.5      | 12      | IGF2          | insulin-like growth factor 2 (somatomedin A)                                           | Gain | Down |
| chr11:2185159-2193107     | 11p15.5      | 7.877   | TH            | tyrosine hydroxylase                                                                   | Gain | Down |
| chr11:3876933-4114440     | 11p15.4      | 237.508 | STIM1         | stromal interaction molecule 1                                                         | Gain | Down |
| chr11:5246696-5248301     | 11p15.4      | 1.606   | HBB           | hemoglobin, beta                                                                       | Gain | Down |
| chr11:5676740-5706339     | 11p15.4      | 21.915  | TRIM5         | tripartite motif containing 5                                                          | Gain | Down |
| chr11:6621144-6624884     | 11p15.4      | 3.737   | RRP8          | ribosomal RNA processing 8, methyltransferase, homolog (yeast)                         | Gain | Down |
| chr11:6633997-6640692     | 11p15.4      | 6.696   | TPP1          | tripeptidyl peptidase I                                                                | Gain | Down |
| chr11:17414432-17498449   | 11p15.1      | 84.018  | ABCC8         | ATP-binding cassette, sub-family C (CFTR/MRP), member 8                                | Gain | Down |
| chr11:45825623-45834568   | 11p11.2      | 8.945   | SLC35C1       | solute carrier family 35 (GDP-fucose transporter), member C1                           | Gain | Down |
| chr11:45868669-45904799   | 11p11.2      | 35.843  | CRY2          | cryptochrome 2 (photolyase-like)                                                       | Gain | Down |
| chr12:125262174-125348519 | 12q24.31     | 86.346  | SCARB1        | scavenger receptor class B, member 1                                                   | Gain | Down |
| chr13:98794893-99102023   | 13q32.2      | 306.59  | FARP1         | FERM, RhoGEF (ARHGEF) and pleckstrin domain protein 1 (chondrocyte-derived)            | Gain | Down |
| chr14:99635624-99738514   | 13q32.2      | 102.198 | <b>BCL11B</b> | B-cell CLL/lymphoma 11B (zinc finger protein)                                          | Gain | Down |
| chr15:42646545-42704515   | 15q15.1      | 52.818  | CAPN3         | calpain 3, (p94)                                                                       | Gain | Down |
| chr15:51200780-51298097   | 15q21.2      | 97.229  | AP4E1         | adaptor-related protein complex 4, epsilon 1 subunit                                   | Gain | Down |
| chr15:89346674-89418585   | 15q26.1      | 71.912  | ACAN          | aggreccan                                                                              | Gain | Down |
| chr15:89785634-89860362   | 15q26.1      | 73.169  | FANCI         | Fanconi anemia, complementation group I                                                | Gain | Down |
| chr16:1357420-1377019     | 16p13.3      | 17.866  | <b>UBE2I</b>  | ubiquitin-conjugating enzyme E2I                                                       | Gain | Down |
| chr16:1728201-1752073     | 16p13.3      | 23.796  | HN1L          | hematological and neurological expressed 1-like                                        | Gain | Down |
| chr16:2525146-2555734     | 16p13.3      | 30.588  | TBC1D24       | TBC1 domain family, member 24                                                          | Gain | Down |
| chr16:3292028-3306648     | 16p13.3      | 14.6    | MEFV          | Mediterranean fever                                                                    | Gain | Down |
| chr16:4524719-4560348     | 16p13.3      | 34.008  | HMOX2         | heme oxygenase (decycling) 2                                                           | Gain | Down |

|                           |                 |         |                |                                                                                         |      |      |
|---------------------------|-----------------|---------|----------------|-----------------------------------------------------------------------------------------|------|------|
| chr16:4853204-4897383     | 16p13.3         | 44.1    | GLYR1          | glyoxylate reductase 1 homolog (Arabidopsis)                                            | Gain | Down |
| chr16:5121810-5137380     | 16p13.3         | 15.571  | ALG1           | ALG1, chitobiosyldiphosphodolichol beta-mannosyltransferase                             | Gain | Down |
| chr16:5289469-7763342     | 16p13.3         | 380.59  | RBFOX1         | RNA binding protein, fox-1 homolog (C. elegans) 1                                       | Gain | Down |
| chr16:9847265-10276611    | 16p13.2         | 428.999 | GRIN2A         | glutamate receptor, ionotropic, N-methyl D-aspartate 2A                                 | Gain | Down |
| chr16:28488600-28505897   | 16p11.2         | 15.024  | CLN3           | ceroid-lipofuscinosis, neuronal 3                                                       | Gain | Down |
| chr16:74481325-74641042   | 16q23.1         | 159.717 | GLG1           | golgi glycoprotein 1                                                                    | Gain | Down |
| chr16:74746853-74808729   | 16q23.1         | 61.874  | FA2H           | fatty acid 2-hydroxylase                                                                | Gain | Down |
| chr17:26083792-26127555   | 17q11.2         | 43.764  | NOS2           | nitric oxide synthase 2, inducible                                                      | Gain | Down |
| chr17:26646121-26655711   | 17q11.2         | 9.591   | TMEM97         | transmembrane protein 97                                                                | Gain | Down |
| chr17:26721661-26733230   | 17q11.2         | 11.57   | SLC46A1        | solute carrier family 46 (folate transporter), member 1                                 | Gain | Down |
| chr17:75277492-75496678   | 17q25.2-q25.3   | 219.187 | SEPT9          | septin 9                                                                                | Gain | Down |
| chr17:76000194-76104916   | 17q25.3         | 104.599 | TNRC6C         | trinucleotide repeat containing 6C                                                      | Gain | Down |
| chr17:76670130-76778376   | 17q25.3         | 108.247 | CYTH1          | cytohesin 1                                                                             | Gain | Down |
| chr19:1269267-1274809     | 19p13.3         | 3.905   | CIRBP          | cold inducible RNA binding protein                                                      | Gain | Down |
| chr19:1383526-1395588     | 19p13.3         | 11.882  | NDUFS7         | NADH dehydrogenase (ubiquinone) Fe-S protein 7, 20kDa (NADH-coenzyme Q reductase)       | Gain | Down |
| chr19:1397025-1401569     | 19p13.3         | 3.76    | GAMT           | guanidinoacetate N-methyltransferase                                                    | Gain | Down |
| chr19:50706885-50813801   | 19q13.33        | 106.917 | MYH14          | myosin, heavy chain 14, non-muscle                                                      | Gain | Down |
| chr19:50818765-50832634   | 19q13.33        | 13.87   | KCNC3          | potassium voltage-gated channel, Shaw-related subfamily, member 3                       | Gain | Down |
| chr19:50879680-50886285   | 19q13.33        | 6.794   | NR1H2          | nuclear receptor subfamily 1, group H, member 2                                         | Gain | Down |
| chr20:2633178-2639039     | 20p13           | 5.862   | NOP56          | NOP56 ribonucleoprotein                                                                 | Gain | Down |
| chr20:61509090-61569304   | 20q13.33        | 48.814  | DIDO1          | death inducer-obliterator 1                                                             | Gain | Down |
| chr20:61826781-61847538   | 20q13.33        | 20.757  | YTHDF1         | YTH domain family, member 1                                                             | Gain | Down |
| chr20:62031561-62103993   | 20q13.33        | 1.804   | KCNQ2          | potassium voltage-gated channel, KQT-like subfamily, member 2                           | Gain | Down |
| chr20:62375021-62463731   | 20q13.33        | 61.836  | ZBTB46         | zinc finger and BTB domain containing 46                                                | Gain | Down |
| chr20:62588057-62601223   | 20q13.33        | 13.167  | <b>ZNF512B</b> | zinc finger protein 512B                                                                | Gain | Down |
| chr21:44473301-44496472   | 21q22.3         | 23.172  | CBS*           | cystathionine-beta-synthase                                                             | Gain | Down |
| chr21:45138978-45182188   | 21q22.3         | 43.211  | PDXK           | pyridoxal (pyridoxine, vitamin B6) kinase                                               | Gain | Down |
| chr21:45193546-45196256   | 21q22.3         | 2.711   | CSTB           | cystatin B (stefin B)                                                                   | Gain | Down |
| chr21:46269500-46294487   | 21q22.3         | 24.319  | PTTG1IP        | pituitary tumor-transforming 1 interacting protein                                      | Gain | Down |
| chr22:24376135-24384284   | 22q21.23        | 8.146   | GSTT1          | glutathione S-transferase theta 1                                                       | Gain | Down |
| chr22:24407642-24574596   | 22q11.23        | 166.832 | CABIN1         | calineurin binding protein 1                                                            | Gain | Down |
| chr22:24666785-24813708   | 22q11.23        | 146.919 | SPECC1L        | sperm antigen with calponin homology and coiled-coil domains 1-like                     | Gain | Down |
| chr22:37621301-37640339   | 22q13.1         | 18.996  | RAC2           | ras-related C3 botulinum toxin substrate 2 (rho family, small GTP binding protein Rac2) | Gain | Down |
| chr22:37764000-37823505   | 22q13.1         | 59.506  | ELFN2          | extracellular leucine-rich repeat and fibronectin type III domain containing 2          | Gain | Down |
| chr22:38349674-38368463   | 22q13.1         | 15.646  | POLR2F         | polymerase (RNA) II (DNA directed) polypeptide F                                        | Gain | Down |
| chr22:38507502-38577857   | 22q13.1         | 70.26   | PLA2G6         | phospholipase A2, group VI (cytosolic, calcium-independent)                             | Gain | Down |
| chr22:42481530-42486888   | 22q13.2         | 5.359   | NDUFA6         | NADH dehydrogenase (ubiquinone) 1 alpha subcomplex, 6, 14kDa                            | Gain | Down |
| chrX:47431300-47479256    | Xp11.23         | 47.957  | SYN1           | synapsin I                                                                              | Gain | Down |
| chrX:48367347-48379202    | Xp11.23         | 11.031  | PORCN          | porcupine homolog (Drosophila)                                                          | Gain | Down |
| chrX:48455880-48463582    | Xp11.23         | 7.703   | WDR13          | WD repeat domain 13                                                                     | Gain | Down |
| chrX:48910961-48927510    | Xp11.23         | 11.014  | CCDC120        | coiled-coil domain containing 120                                                       | Gain | Down |
| chrX:49126305-49144557    | Xp11.23         | 18.25   | PPP1R3F        | protein phosphatase 1, regulatory subunit 3F                                            | Gain | Down |
| chrX:53262058-53350522    | Xp11.22         | 88.465  | IQSEC2         | IQ motif and Sec7 domain 2                                                              | Gain | Down |
| chrX:122317996-122624766  | Xq25            | 306.671 | GRIA3          | glutamate receptor, ionotropic, AMPA 3                                                  | Gain | Down |
| chrX:153287025-153363188  | Xq28            | 75.925  | MECP2          | methyl CpG binding protein 2 (Rett syndrome)                                            | Gain | Down |
| chrY:16634488-16956825    | Yq11.221        | 320.223 | NLGN4Y         | neuroligin 4, Y-linked                                                                  | Gain | Down |
| chrY:21212994-21239302    | Yq11.222        | 144.718 | TTY14          | testis-specific transcript, Y-linked 14 (non-protein coding)                            | Gain | Down |
| chrY:21867301-21906825    | Yq11.222        | 39.525  | KDM5D          | lysine (K)-specific demethylase 5D                                                      | Gain | Down |
| chr1:175291935-175712752  | 1q25.1          | 420.818 | TNR            | tenascin R                                                                              | Loss | Up   |
| chr1:176432307-176814737  | 1q25.2          | 379.664 | PAPPA2         | pappalysin 2                                                                            | Loss | Up   |
| chr2:32581735-32843966    | 2p22.3          | 261.87  | BIRC6          | baculoviral IAP repeat containing 6                                                     | Loss | Up   |
| chr4:1795039-1810599      | 4p16.3          | 15.561  | FGFR3*         | fibroblast growth factor receptor 3                                                     | Loss | Up   |
| chr6:76311596-76427997    | 6q14.1          | 116.373 | SENPA6         | SUMO1/sentrin specific peptidase 6                                                      | Loss | Up   |
| chr8:38127217-38239872    | 8p11.23         | 107.23  | WHSC1L1        | Wolf-Hirschhorn syndrome candidate 1-like 1                                             | Loss | Up   |
| chr8:38268656-38326352    | 8p11.23-p11.22  | 56.708  | FGFR1          | fibroblast growth factor receptor 1                                                     | Loss | Up   |
| chr8:38854505-38962780    | 8p11.22         | 108.275 | ADAM9          | ADAM metallopeptidase domain 9                                                          | Loss | Up   |
| chr9:135136827-135232113  | 9q34.13         | 93.546  | SETX           | senataxin                                                                               | Loss | Up   |
| chr10:76584685-76792380   | 10q22.2         | 206.21  | KAT6B          | K(lysine) acetyltransferase 6B                                                          | Loss | Up   |
| chr10:94352825-94415152   | 10q23.33        | 62.328  | KIF11          | kinesin family member 11                                                                | Loss | Up   |
| chr11:108093559-108239829 | 11q22.3         | 146.268 | ATM*           | ataxia telangiectasia mutated                                                           | Loss | Up   |
| chr14:92524896-92572965   | 14q32.12        | 48.07   | ATXN3          | ataxin 3                                                                                | Loss | Up   |
| chr15:64199235-64363614   | 15q22.31        | 139.287 | DAPK2*         | death-associated protein kinase 2                                                       | Loss | Up   |
| chr15:78885394-78913637   | 15q25.1         | 25.991  | CHRNA3         | cholinergic receptor, nicotinic, alpha 3 (neuronal)                                     | Loss | Up   |
| chr17:2659050-2941035     | 17p13.3         | 241.304 | RAP1GAP2       | RAP1 GTPase activating protein 2                                                        | Loss | Up   |
| chr17:29421945-29704695   | 17q11.2         | 282.751 | NF1            | neurofibromin 1                                                                         | Loss | Up   |
| chr19:37638340-37663643   | 19q13.12        | 22.615  | ZNF585A        | zinc finger protein 585A                                                                | Loss | Up   |
| chr20:34359923-34538292   | 20q11.22-q11.23 | 178.366 | PHF20          | PHD finger protein 20                                                                   | Loss | Up   |
| chr20:42984441-43061485   | 20q13.12        | 51.675  | HNF4A          | hepatocyte nuclear factor 4, alpha                                                      | Loss | Up   |

\*CNV-encompassed genes selectively detected in SALS patients and not in control individuals.

Supplementary Table 12. The top 15 functional enrichment of CNV-associated DEGs in SALS.

| SALS1                       |                                                        |         |         |
|-----------------------------|--------------------------------------------------------|---------|---------|
| GO Term                     | GO name                                                | Ratio   | p-value |
| <i>Biological processes</i> |                                                        |         |         |
| GO:0051129                  | negative regulation of cellular component organization | 8/474   | 0.0002  |
| GO:0071103                  | DNA conformation change                                | 4/99    | 0.0004  |
| GO:1901214                  | regulation of neuron death                             | 5/225   | 0.0012  |
| GO:0051346                  | negative regulation of hydrolase activity              | 6/354   | 0.0015  |
| GO:0009123                  | nucleoside monophosphate metabolic process             | 6/427   | 0.0038  |
| GO:0051962                  | positive regulation of nervous system development      | 5/313   | 0.0048  |
| GO:0016568                  | chromatin modification                                 | 6/475   | 0.0063  |
| GO:0010564                  | regulation of cell cycle process                       | 6/481   | 0.0067  |
| GO:0006457                  | protein folding                                        | 4/221   | 0.0075  |
| GO:0010720                  | positive regulation of cell development                | 5/358   | 0.0084  |
| GO:0007411                  | axon guidance                                          | 5/367   | 0.0093  |
| GO:0097485                  | neuron projection guidance                             | 5/367   | 0.0093  |
| GO:0052547                  | regulation of peptidase activity                       | 5/372   | 0.0098  |
| GO:0046034                  | ATP metabolic process                                  | 5/377   | 0.0103  |
| GO:0006281                  | DNA repair                                             | 5/403   | 0.0135  |
| <i>Molecular functions</i>  |                                                        |         |         |
| GO:0044389                  | small conjugating protein ligase binding               | 5/182   | 0.0004  |
| GO:0031625                  | ubiquitin protein ligase binding                       | 5/182   | 0.0004  |
| GO:0004386                  | helicase activity                                      | 4/150   | 0.0019  |
| GO:0016887                  | ATPase activity                                        | 6/395   | 0.0026  |
| GO:0008017                  | microtubule binding                                    | 4/171   | 0.0031  |
| GO:0051082                  | unfolded protein binding                               | 3/101   | 0.0054  |
| GO:0015631                  | tubulin binding                                        | 4/241   | 0.0101  |
| GO:0003774                  | motor activity                                         | 3/132   | 0.0112  |
| GO:0005524                  | ATP binding                                            | 11/1494 | 0.0142  |
| GO:0050839                  | cell adhesion molecule binding                         | 3/168   | 0.0211  |
| <i>Cellular components</i>  |                                                        |         |         |
| GO:0044449                  | contractile fiber part                                 | 4/167   | 0.0028  |
| GO:0005925                  | focal adhesion                                         | 5/352   | 0.0078  |
| GO:0005874                  | microtubule                                            | 5/360   | 0.0086  |
| GO:0044420                  | extracellular matrix part                              | 3/127   | 0.0100  |
| GO:0031965                  | nuclear membrane                                       | 3/149   | 0.0154  |
| GO:0005694                  | chromosome                                             | 3/166   | 0.0205  |
| GO:0005730                  | nucleolus                                              | 11/1653 | 0.0279  |
| GO:0005774                  | vacuolar membrane                                      | 3/208   | 0.0365  |
| GO:0031301                  | integral component of organelle membrane               | 3/211   | 0.0378  |
| GO:0005765                  | lysosomal membrane                                     | 3/196   | 0.0314  |

| SALS2                       |                                                            |         |             |
|-----------------------------|------------------------------------------------------------|---------|-------------|
| GO Term                     | GO name                                                    | Ratio   | p-value     |
| <i>Biological processes</i> |                                                            |         |             |
| GO:0050804                  | regulation of synaptic transmission                        | 21/245  | 3.45E-12    |
| GO:0007611                  | learning or memory                                         | 19/198  | 5.26503E-12 |
| GO:1901214                  | regulation of neuron death                                 | 18/225  | 3.94422E-10 |
| GO:0007626                  | locomotory behavior                                        | 16/183  | 1.04645E-09 |
| GO:0048167                  | regulation of synaptic plasticity                          | 12/120  | 2.99133E-08 |
| GO:0048710                  | regulation of astrocyte differentiation                    | 6/24    | 3.64235E-07 |
| GO:0060078                  | regulation of postsynaptic membrane potential              | 8/58    | 5.27232E-07 |
| GO:0050905                  | neuromuscular process                                      | 9/79    | 5.41697E-07 |
| GO:0030036                  | actin cytoskeleton organization                            | 15/253  | 6.0561E-07  |
| GO:0051588                  | regulation of neurotransmitter transport                   | 8/63    | 1.01036E-06 |
| GO:0030029                  | actin filament-based process                               | 16/303  | 1.18514E-06 |
| GO:0036293                  | response to decreased oxygen levels                        | 14/245  | 2.23185E-06 |
| GO:0032368                  | regulation of lipid transport                              | 8/83    | 8.32898E-06 |
| GO:0033674                  | positive regulation of kinase activity                     | 19/480  | 8.39154E-06 |
| GO:0045664                  | regulation of neuron differentiation                       | 17/405  | 1.19437E-05 |
| <i>Molecular functions</i>  |                                                            |         |             |
| GO:0016597                  | amino acid binding                                         | 9/107   | 7.00126E-06 |
| GO:0008134                  | transcription factor binding                               | 17/464  | 6.6232E-05  |
| GO:0005516                  | calmodulin binding                                         | 9/170   | 0.000263527 |
| GO:0005231                  | excitatory extracellular ligand-gated ion channel activity | 5/48    | 0.000300649 |
| GO:0005524                  | ATP binding                                                | 34/1494 | 0.000371211 |
| GO:0048037                  | cofactor binding                                           | 11/266  | 0.000478237 |
| GO:0015459                  | potassium channel regulator activity                       | 4/40    | 0.001441792 |
| GO:0008270                  | zinc ion binding                                           | 28/1256 | 0.001704809 |
| GO:0002020                  | protease binding                                           | 5/77    | 0.002600257 |
| GO:0043130                  | ubiquitin binding                                          | 5/77    | 0.002600257 |
| <i>Cellular components</i>  |                                                            |         |             |
| GO:0005829                  | cytosol                                                    | 70/2529 | 2.48352E-11 |
| GO:0030425                  | dendrite                                                   | 17/236  | 6.04827E-09 |
| GO:0044456                  | synapse part                                               | 19/395  | 4.83099E-07 |
| GO:0009986                  | cell surface                                               | 20/437  | 5.24901E-07 |
| GO:0043025                  | neuronal cell body                                         | 15/270  | 1.37172E-06 |
| GO:0030424                  | axon                                                       | 11/161  | 5.12808E-06 |
| GO:0030426                  | growth cone                                                | 8/99    | 3.05361E-05 |
| GO:0043235                  | receptor complex                                           | 13/272  | 3.44742E-05 |
| GO:0005774                  | vacuolar membrane                                          | 11/208  | 5.60909E-05 |
| GO:0005654                  | nucleoplasm                                                | 26/1051 | 0.000569112 |

**Supplementary Table 13. The signal pathway enrichment of CNV-associated DEGs**

| #  | Maps                              | min(pValue) | min(FDR) | -log(pValue) | SALS1/CTRL+ |          |          |              | SALS2_CTRL |          |          |              |
|----|-----------------------------------|-------------|----------|--------------|-------------|----------|----------|--------------|------------|----------|----------|--------------|
|    |                                   |             |          |              | Ratio       | p-value  | FDR      | -log(pValue) | Ratio      | p-value  | FDR      | -log(pValue) |
| 1  | Ras signaling pathway             | 0.000001    | 0.000314 | 5.8570       | 2/227       | 0.188667 | 0.355397 | 0.7243       | 14/227     | 0.000001 | 0.000194 | 6.0436       |
| 2  | Huntington's disease signaling    | 0.000002    | 0.000147 | 5.6658       | 9/124       | 0.000023 | 0.000751 | 4.6360       | 11/124     | 0.000002 | 0.000147 | 5.6658       |
| 3  | Axon guidance                     | 0.000002    | 0.000682 | 5.6223       | 5/515       | 0.034246 | 0.268766 | 1.4654       | 21/515     | 0.000002 | 0.000719 | 5.7597       |
| 4  | MAPK signaling pathway            | 0.000026    | 0.001940 | 4.5891       | 2/255       | 0.224438 | 0.363538 | 0.6489       | 13/255     | 0.000018 | 0.001252 | 4.7555       |
| 5  | mTOR signaling pathway            | 0.000103    | 0.005779 | 3.9857       | 1/68        | 0.303613 | 0.333815 | 0.5177       | 7/68       | 0.000103 | 0.005779 | 3.9857       |
| 6  | T cell activation                 | 0.000184    | 0.009671 | 3.7347       | 5/101       | 0.000184 | 0.009671 | 3.7347       | 6/101      | 0.005663 | 0.047492 | 2.2469       |
| 7  | HMGB1/RAGE signaling pathway      | 0.000193    | 0.008624 | 3.7149       | 1/53        | 0.245588 | 0.316988 | 0.6098       | 6/53       | 0.000193 | 0.008624 | 3.7149       |
| 8  | p53 pathway                       | 0.000605    | 0.008650 | 3.2179       | 2/71        | 0.025693 | 0.081846 | 1.5902       | 5/71       | 0.001818 | 0.019700 | 2.7403       |
| 9  | Glucocorticoid receptor signaling | 0.000624    | 0.014958 | 3.2047       | 1/25        | 0.124312 | 0.316988 | 0.9055       | 4/25       | 0.000624 | 0.014958 | 3.2047       |
| 10 | FGF signaling pathway             | 0.000636    | 0.008650 | 3.1965       | 1/99        | 0.293875 | 0.347679 | 0.5318       | 7/99       | 0.000223 | 0.003618 | 3.6524       |
| 11 | TNF signaling pathway             | 0.000810    | 0.017543 | 3.0913       | 1/46        | 0.216912 | 0.316988 | 0.6637       | 5/46       | 0.000810 | 0.017543 | 3.0913       |
| 12 | Apoptosis and survival signaling  | 0.003908    | 0.029524 | 2.4081       | 3/102       | 0.005505 | 0.081846 | 2.2593       | 4/102      | 0.037272 | 0.093179 | 1.4286       |
| 13 | Notch signaling pathway           | 0.005292    | 0.041244 | 2.2763       | 1/48        | 0.155063 | 0.352632 | 0.8095       | 3/48       | 0.021175 | 0.085499 | 1.6742       |
| 14 | B cell receptor signaling pathway | 0.007520    | 0.108525 | 2.1238       | 3/192       | 0.029819 | 0.268766 | 1.5255       | 7/192      | 0.009809 | 0.088754 | 2.0084       |
| 15 | Extracellular matrix organization | 0.009173    | 0.108525 | 2.0375       | 3/283       | 0.076919 | 0.268766 | 1.1140       | 9/283      | 0.008598 | 0.087814 | 2.0656       |
| 16 | VEGF signaling pathway            | 0.009334    | 0.108525 | 2.0299       | 2/328       | 0.319027 | 0.385167 | 0.4962       | 11/328     | 0.002573 | 0.051877 | 2.5895       |
| 17 | PI3K-Akt signaling pathway        | 0.012219    | 0.068626 | 1.9130       | 1/341       | 0.700575 | 0.709332 | 0.1545       | 11/341     | 0.003459 | 0.026436 | 2.4611       |
| 18 | Protein folding and processing    | 0.012450    | 0.068626 | 1.9048       | 3/169       | 0.021470 | 0.286433 | 1.6682       | 6/169      | 0.018361 | 0.075561 | 1.7361       |
| 19 | Regulation of actin cytoskeleton  | 0.013858    | 0.073399 | 1.8583       | 1/214       | 0.529681 | 0.564529 | 0.2760       | 8/214      | 0.005117 | 0.032209 | 2.2910       |
| 20 | Interleukin signaling pathway     | 0.030398    | 0.177505 | 1.5172       | 2/392       | 0.399958 | 0.448255 | 0.3980       | 11/392     | 0.009529 | 0.088754 | 2.0209       |

**Supplementary Table 14. Cluster random assignment of SALS patients.**

| <b>Patient code</b> | <b>Unsupervised Clustering</b> | <b>Randomized clustering assignement</b> |
|---------------------|--------------------------------|------------------------------------------|
| 1                   | Control                        | Control                                  |
| 2                   | Control                        | Control                                  |
| 3                   | Control                        | Control                                  |
| 4                   | Control                        | Control                                  |
| 5                   | Control                        | Control                                  |
| 6                   | Control                        | Control                                  |
| 7                   | Control                        | Control                                  |
| 8                   | Control                        | Control                                  |
| 9                   | Control                        | Control                                  |
| 10                  | Control                        | Control                                  |
| 11                  | ALS 1                          | Group 1                                  |
| 12                  | ALS 1                          | Group 1                                  |
| 13                  | ALS 1                          | Group 2                                  |
| 14                  | ALS 1                          | Group 2                                  |
| 15                  | ALS 2                          | Group 2                                  |
| 16                  | ALS 1                          | Group 2                                  |
| 17                  | ALS 1                          | Group 2                                  |
| 18                  | ALS 1                          | Group 2                                  |
| 19                  | ALS 1                          | Group 2                                  |
| 20                  | ALS 1                          | Group 2                                  |
| 21                  | ALS 1                          | Group 1                                  |
| 22                  | ALS 1                          | Group 1                                  |
| 23                  | ALS 1                          | Group 1                                  |
| 24                  | ALS 1                          | Group 2                                  |
| 25                  | ALS 1                          | Group 2                                  |
| 26                  | ALS 1                          | Group 2                                  |
| 27                  | ALS 1                          | Group 1                                  |
| 29                  | ALS 2                          | Group 1                                  |
| 30                  | ALS 2                          | Group 1                                  |
| 31                  | ALS 2                          | Group 2                                  |
| 32                  | ALS 2                          | Group 2                                  |
| 33                  | ALS 2                          | Group 2                                  |
| 34                  | ALS 2                          | Group 2                                  |
| 35                  | ALS 2                          | Group 1                                  |
| 36                  | ALS 2                          | Group 1                                  |
| 37                  | ALS 2                          | Group 1                                  |
| 38                  | ALS 2                          | Group 1                                  |
| 39                  | ALS 2                          | Group 1                                  |
| 40                  | ALS 2                          | Group 1                                  |
| 41                  | ALS 2                          | Group 1                                  |
